# Supplementary material for: WHIRLY1 Acts Upstream of ABA-Related Reprogramming of Drought-Induced Gene Expression in Barley and Affects Stress-Related Histone Modifications
Source: Int J Mol Sci. 2023 Mar 28;24(7):6326. doi: 10.3390/ijms24076326 (PMC10094662; doi:10.3390/ijms24076326)
Supplement: Supplementary file 1 [file ijms-24-06326-s001.zip]

Archive with 5 entries (5 files):
- Supplemental Figures and Tables legends.pdf
- Supplemental table S1_1.xlsx
- Supplemental table S2.xlsx
- Supplemental table S315.02.RANKING.xlsx
- Supplemental table S4.xlsx
