# Supplementary material for: WHIRLY1 Acts Upstream of ABA-Related Reprogramming of Drought-Induced Gene Expression in Barley and Affects Stress-Related Histone Modifications
Source: Int J Mol Sci. 2023 Mar 28;24(7):6326. doi: 10.3390/ijms24076326 (PMC10094662; doi:10.3390/ijms24076326)
Supplement: Supplementary file 1 [file ijms-24-06326-s001.zip › Supplemental table S1_1.xlsx]

## Sheet: Sheet1
Primer	Sequence (5'-3')	Gene ID	Product size (bp)	Description
HvPP2A-for	CACCATTTCTCAGCTTGTATTG	HORVU.MOREX.r2.4HG0335530	140	qRT-PCR reference gene
HvPP2A-rev	CACCCCTTTGTTATTGTTTGTTG	HORVU.MOREX.r2.4HG0335530		qRT-PCR reference gene
HvNCED1-fw02	CGCCCTCCATCCCTCCCATCTTCT	HORVU.MOREX.r2.5HG0354290	132	qRT-PCR
HvNCED1-rv02	CCGCCGCTAACTGTTTCCTCTTCC	HORVU.MOREX.r2.5HG0354290		qRT-PCR
HvS40_for01	CGACGGCGACGTCCGATGTA	HORVU.MOREX.r2.1HG0067180	137	qRT-PCR
HvS40_rev01	CTTTGAGCGTCCTCCCTTTGC	HORVU.MOREX.r2.1HG0067180		qRT-PCR
HvEF-1α_F	GAAGATGATTCCCACCAAGC	HORVU.MOREX.r2.5HG0427750	107	qRT-PCR reference gene
HvEF-1α_R	TGACACCAACAGCCACAGTT	HORVU.MOREX.r2.5HG0427750		qRT-PCR reference gene
HvCCD5_02_fw	CACGATGAGGGCACAAATA	HORVU.MOREX.r2.3HG0267820	116	qRT-PCR
HvCCD5_02_rv	GCTCCATGAAAGCCATAGG	HORVU.MOREX.r2.3HG0267820		qRT-PCR
HvCCD8_03_fw	AGAGTCCAGTGAGATATGGG	HORVU.MOREX.r2.5HG0392060	102	qRT-PCR
HvCCD8_03_rv	CGATTGGCGTAGGAGATTG	HORVU.MOREX.r2.5HG0392060		qRT-PCR
HvS40_CHIP_IV_fw	CCTTCCTTCCACAGCACACC	HORVU.MOREX.r2.1HG0067180	238	CHIP-qPCR
HvS40_CHIP_IV_rv	GAGGACCGGGGCAGACAG	HORVU.MOREX.r2.1HG0067180		CHIP-qPCR
HvS40_CHIP_II_fw	CCGCCATTGGTAAGTAGGAC	HORVU.MOREX.r2.1HG0067180	136	CHIP-qPCR
HvS40_CHIP_II_rv	GATGGAAGGAAGGAAGGGGTTG	HORVU.MOREX.r2.1HG0067180		CHIP-qPCR
HvS40_CHIP_III_fw	CAGGCGCAGGCAGAGACAC	HORVU.MOREX.r2.1HG0067180	141	CHIP-qPCR
HvS40_CHIP_III_rv	GAAGGGGATGGAGATTGGAGAAG	HORVU.MOREX.r2.1HG0067180		CHIP-qPCR
NCED1_CHIP_02_fw	ATCTCCCTCACTCCCATCAC	HORVU.MOREX.r2.5HG0354290	128	CHIP-qPCR
NCED1_CHIP_02_rv	AGAAGAAGAGAGCTGGTCCG	HORVU.MOREX.r2.5HG0354290		CHIP-qPCR
NCED1_CHIP_04_fw	GAGCAGAGCCTCAACTTCTT	HORVU.MOREX.r2.5HG0354290	82	CHIP-qPCR
NCED1_CHIP_04_rv	CCAGGACATTGTTGATGAACC	HORVU.MOREX.r2.5HG0354290		CHIP-qPCR
NCED1_CHIP_03_fw	TTCCTCTGCTCTCCCTTCCC	HORVU.MOREX.r2.5HG0354290	149	CHIP-qPCR
NCED1_CHIP_03_rv	GAGTCTGCATCGCTGATCCT	HORVU.MOREX.r2.5HG0354290		CHIP-qPCR
NCED1_CHIP_01_fw	GCAGGAGAGGAGGAGGAAAAAG	HORVU.MOREX.r2.5HG0354290	130	CHIP-qPCR
NCED1_CHIP_01_rv	GAGGTGAGGTGAGGTGAGTCGT	HORVU.MOREX.r2.5HG0354290		CHIP-qPCR
