# Supplementary material for: WHIRLY1 Acts Upstream of ABA-Related Reprogramming of Drought-Induced Gene Expression in Barley and Affects Stress-Related Histone Modifications
Source: Int J Mol Sci. 2023 Mar 28;24(7):6326. doi: 10.3390/ijms24076326 (PMC10094662; doi:10.3390/ijms24076326)
Supplement: Supplementary file 1 [file ijms-24-06326-s001.zip › Supplemental table S2.xlsx]

## Sheet: All DEGs
gene_id	WT_28C	OE_28C	WT_28D	OE_28D	gene_description	tf_family
HORVU.MOREX.r2.7HG0539530	14.0866	2834.56	12.8742	2781.9	- && B2LXS7.1 RecName: Full=Single-stranded DNA-binding protein WHY1, chloroplastic; AltName: Full=Protein WHIRLY 1; Short=ZmWHY1; Flags: Precursor && PF08536:Whirly transcription factor	-
HORVU.MOREX.r2.5HG0411100	0.691067	25.6933	0.416789	22.9765	- && - && PF02362:B3 DNA binding domain	B3
HORVU.MOREX.r2.7HG0585880	0.456602	26.8029	0.817862	23.9563	- && Q5JLB5.2 RecName: Full=Zinc finger CCCH domain-containing protein 12; Short=OsC3H12; AltName: Full=Zinc finger CCCH domain-containing protein ZFN-like 2 && PF00642:Zinc finger C-x8-C-x5-C-x3-H type (and similar)	zf-CCCH
HORVU.MOREX.r2.UnG0635510	4.74257	67.013	2.68576	67.9564	- && P12119.3 RecName: Full=Cytochrome b6-f complex subunit 4; AltName: Full=17 kDa polypeptide >A1E9V5.1 RecName: Full=Cytochrome b6-f complex subunit 4; AltName: Full=17 kDa polypeptide >P12361.4 RecName: Full=Cytochrome b6-f complex subunit 4; AltName:	-
novel.1597	0.26604	10.0564	0.123643	11.7244	- && - && -	-
HORVU.MOREX.r2.3HG0206750	1.03675	25.1503	0.849685	66.7818	- && Q07469.1 RecName: Full=Bark storage protein A; Flags: Precursor [Populus deltoides] && PF01048:Phosphorylase superfamily	-
HORVU.MOREX.r2.5HG0390620	46.4743	0.0703617	56.7608	0.126791	- && P07370.1 RecName: Full=Chlorophyll a-b binding protein 1B, chloroplastic; AltName: Full=LHCII type I CAB-1B; Short=LHCP; Flags: Precursor && PF00504:Chlorophyll A-B binding protein	-
HORVU.MOREX.r2.UnG0632750	3.1331	41.3645	2.0534	36.1475	- && Q6ENW6.1 RecName: Full=ATP synthase subunit alpha, chloroplastic; AltName: Full=ATP synthase F1 sector subunit alpha; AltName: Full=F-ATPase subunit alpha >A1E9S1.1 RecName: Full=ATP synthase subunit alpha, chloroplastic; AltName: Full=ATP synthase F	ATP-synt_ab
HORVU.MOREX.r2.2HG0110920	0.0470245	40.1495	0.0958675	34.2435	- && - && -	-
HORVU.MOREX.r2.2HG0090880	0.383179	15.9346	0.0848353	14.9314	- && Q9SG80.1 RecName: Full=Alpha-L-arabinofuranosidase 1; Short=AtASD1; AltName: Full=Beta-D-xylosidase; Flags: Precursor && PF06964:Alpha-L-arabinofuranosidase C-terminus	-
novel.1006	0.459328	11.6713	0.271168	10.1069	- && P69668.1 RecName: Full=50S ribosomal protein L23, chloroplastic >A1EA51.1 RecName: Full=50S ribosomal protein L23-B, chloroplastic && -	-
HORVU.MOREX.r2.6HG0461250	17.6069	0.182996	17.7732	0.258209	- && - && PF12937:F-box-like	-
HORVU.MOREX.r2.6HG0487790	4.51996	37.9082	2.66391	34.9323	- && A1E9I8.1 RecName: Full=ATP synthase subunit alpha, chloroplastic; AltName: Full=ATP synthase F1 sector subunit alpha; AltName: Full=F-ATPase subunit alpha && PF00306:ATP synthase alpha/beta chain, C terminal domain|PF00006:ATP synthase alpha/beta fam	ATP-synt_ab
novel.1082	0.0891494	4.17826	0.0598707	3.97293	- && O98691.1 RecName: Full=NAD(P)H-quinone oxidoreductase subunit H, chloroplastic; AltName: Full=NAD(P)H dehydrogenase subunit H; AltName: Full=NADH-plastoquinone oxidoreductase 49 kDa subunit; AltName: Full=NADH-plastoquinone oxidoreductase subunit H &	TPR_1
HORVU.MOREX.r2.UnG0633470	1.45235	37.0813	0.721686	30.8488	- && A1E9L2.1 RecName: Full=30S ribosomal protein S18, chloroplastic && PF01084:Ribosomal protein S18	-
HORVU.MOREX.r2.UnG0636270	560.214	3841.55	331.049	3283.28	- && Q6ENA6.3 RecName: Full=Photosystem I iron-sulfur center; AltName: Full=9 kDa polypeptide; AltName: Full=PSI-C; AltName: Full=Photosystem I subunit VII; AltName: Full=PsaC >Q6ENP6.3 RecName: Full=Photosystem I iron-sulfur center; AltName: Full=9 kDa p	-
novel.508	0	3.77417	0.0418675	7.77013	- && - && -	-
novel.1234	0.0901834	15.0891	0.104876	16.7022	- && - && -	-
HORVU.MOREX.r2.5HG0396600	4.24322	53.0618	3.92072	55.9773	- && - && -	-
HORVU.MOREX.r2.2HG0169050	134.148	11.111	381.416	13.0293	- && - && -	-
novel.27	1.09407	10.3832	0.723058	9.4118	- && - && -	-
novel.1785	1.99121	17.7356	0.814809	13.5322	- && A1E9N8.1 RecName: Full=50S ribosomal protein L32, chloroplastic && -	-
HORVU.MOREX.r2.1HG0057620	6.23046	3.43704	20.4657	2.58518	- && Q9SR86.1 RecName: Full=Alanine--glyoxylate aminotransferase 2 homolog 3, mitochondrial; AltName: Full=Beta-alanine-pyruvate aminotransferase 3; Flags: Precursor && PF00202:Aminotransferase class-III	Aminotran_3
HORVU.MOREX.r2.1HG0051090	0.493634	49.0939	0.139323	49.5203	- && - && -	-
HORVU.MOREX.r2.4HG0280660	58.0435	121.621	3.84632	37.616	- && Q10E50.1 RecName: Full=Phospholipase A2 homolog 3; Flags: Precursor && -	-
HORVU.MOREX.r2.3HG0192020	35.7911	9.2057	103.151	7.1508	- && A0SPJ6.1 RecName: Full=NAC transcription factor NAM-B2; Short=TtNAM-B2 && PF02365:No apical meristem (NAM) protein	NAM
novel.400	0.10109	1.65553	0.0697443	1.67612	- && Q9XPS5.1 RecName: Full=Uncharacterized protein ycf70; AltName: Full=ORF42 && -	-
HORVU.MOREX.r2.UnG0635350	0.279585	16.8352	0.0786745	13.5807	- && Q76LL9.1 RecName: Full=Maturase K; AltName: Full=Intron maturase >Q76LM0.1 RecName: Full=Maturase K; AltName: Full=Intron maturase && PF01824:MatK/TrnK amino terminal region|PF01348:Type II intron maturase	-
HORVU.MOREX.r2.7HG0623230	26.7374	49.13	5.18846	31.7861	- && Q8L5A7.1 RecName: Full=Cytosolic sulfotransferase 15; Short=AtSOT15; AltName: Full=Sulfotransferase 2a; Short=AtST2a && PF00685:Sulfotransferase domain	Sulfotransfer_1
HORVU.MOREX.r2.2HG0159460	0.131387	17.8208	0.168739	15.8155	- && - && -	-
HORVU.MOREX.r2.1HG0067320	53.395	4.41842	187.445	3.60799	- && P39101.1 RecName: Full=Protein CAJ1 && PF00226:DnaJ domain|PF13370:4Fe-4S single cluster domain of Ferredoxin I	DnaJ
HORVU.MOREX.r2.2HG0143250	2.43608	10.5279	0.122862	7.86198	- && P47082.1 RecName: Full=Vacuolar amino acid transporter 1 && PF01490:Transmembrane amino acid transporter protein	Aa_trans
HORVU.MOREX.r2.7HG0555570	3.2297	0.731463	20.203	1.21836	- && Q9CAB8.1 RecName: Full=Probable peroxygenase 5; Short=AtPXG5; AltName: Full=Caleosin-5 && PF05042:Caleosin related protein	-
novel.1781	0.615665	9.62251	0.350673	8.05326	- && P20175.1 RecName: Full=Photosystem II reaction center protein J; Short=PSII-J >Q6W6Q8.1 RecName: Full=Photosystem II reaction center protein J; Short=PSII-J >Q6W6R2.1 RecName: Full=Photosystem II reaction center protein J; Short=PSII-J && -	-
HORVU.MOREX.r2.1HG0067180	139.164	8.59471	475.196	9.01581	- && - && PF04520:Senescence regulator	-
HORVU.MOREX.r2.3HG0251960	2.86576	1.3627	8.5992	1.14825	- && O04226.2 RecName: Full=Delta-1-pyrroline-5-carboxylate synthase; Short=P5CS; Includes: RecName: Full=Glutamate 5-kinase; Short=GK; AltName: Full=Gamma-glutamyl kinase; Includes: RecName: Full=Gamma-glutamyl phosphate reductase; Short=GPR; AltName: Fu	AA_kinase
HORVU.MOREX.r2.UnG0634920	0.221902	22.5739	0.218835	21.8221	- && A1EA58.1 RecName: Full=Cytochrome c biogenesis protein CcsA && PF01578:Cytochrome C assembly protein	-
HORVU.MOREX.r2.UnG0635430	20.5551	115.355	11.5437	95.0357	- && Q6ENA6.3 RecName: Full=Photosystem I iron-sulfur center; AltName: Full=9 kDa polypeptide; AltName: Full=PSI-C; AltName: Full=Photosystem I subunit VII; AltName: Full=PsaC >Q6ENP6.3 RecName: Full=Photosystem I iron-sulfur center; AltName: Full=9 kDa p	-
HORVU.MOREX.r2.7HG0602170	2.29348	13.772	0.773972	14.5908	- && - && -	-
HORVU.MOREX.r2.3HG0255670	11.0575	34.5751	2.20594	36.6527	- && - && PF05697:Bacterial trigger factor protein (TF)	-
HORVU.MOREX.r2.2HG0169380	184.071	37.666	831.403	35.9211	- && F4JJL0.1 RecName: Full=Endonuclease 4; Short=AtENDO4; AltName: Full=Deoxyribonuclease ENDO4; AltName: Full=Single-stranded-nucleate endonuclease ENDO4; Flags: Precursor && PF02265:S1/P1 Nuclease	-
HORVU.MOREX.r2.2HG0166210	0.231584	10.5932	0.219435	7.09956	- && - && PF02902:Ulp1 protease family, C-terminal catalytic domain	Peptidase_C48
HORVU.MOREX.r2.4HG0302250	1.75229	15.5801	1.03951	10.172	- && - && PF13418:Galactose oxidase, central domain	-
HORVU.MOREX.r2.5HG0410240	35.1516	5.71317	105.43	4.34875	- && Q9ZVN2.1 RecName: Full=Acyltransferase-like protein At1g54570, chloroplastic; Flags: Precursor && PF12146:Serine aminopeptidase, S33|PF03982:Diacylglycerol acyltransferase	-
HORVU.MOREX.r2.3HG0242100	3.60564	0.685598	11.9736	0.526276	- && P0C0M2.1 RecName: Full=Probable indole-3-acetic acid-amido synthetase GH3.2; AltName: Full=Auxin-responsive GH3-like protein 2; Short=OsGH3-2 && PF03321:GH3 auxin-responsive promoter	-
HORVU.MOREX.r2.3HG0205850	4.44663	1.28784	30.9354	1.81866	- && Q9CA93.1 RecName: Full=Mitochondrial arginine transporter BAC2; AltName: Full=Mitochondrial basic amino acid carrier 2; Short=AtMBAC2 && PF00153:Mitochondrial carrier protein	Mito_carr
novel.325	0	27.0558	0	31.3459	- && - && -	-
HORVU.MOREX.r2.3HG0190050	32.7757	5.15409	121.322	2.65957	- && Q43257.1 RecName: Full=indole-2-monooxygenase; AltName: Full=Cytochrome P450 71C4; AltName: Full=Protein benzoxazineless 2 && PF00067:Cytochrome P450	p450
HORVU.MOREX.r2.1HG0039150	129.356	279.243	48.3576	254.188	- && - && PF04043:Plant invertase/pectin methylesterase inhibitor	-
HORVU.MOREX.r2.UnG0634190	38.4203	259.344	15.5554	224.279	- && O03060.2 RecName: Full=NAD(P)H-quinone oxidoreductase chain 4, chloroplastic; AltName: Full=NAD(P)H dehydrogenase, chain 4; AltName: Full=NADH-plastoquinone oxidoreductase chain 4 && -	-
novel.435	0.124201	5.05703	0.20305	3.85062	- && O82413.1 RecName: Full=Histidine--tRNA ligase, chloroplastic/mitochondrial; AltName: Full=Histidyl-tRNA synthetase; Short=HisRS; AltName: Full=Histidyl-tRNA synthetase 1; Short=AtHRS1; Flags: Precursor && -	-
HORVU.MOREX.r2.4HG0346110	2.89024	24.8851	0.94714	29.6724	- && Q700E3.1 RecName: Full=Transcription factor bHLH27; AltName: Full=Basic helix-loop-helix protein 27; Short=AtbHLH27; Short=bHLH 27; AltName: Full=Transcription factor EN 42; AltName: Full=bHLH transcription factor bHLH027 && PF00010:Helix-loop-helix	HLH
novel.1121	0.0369736	4.82142	0	12.0541	- && - && -	-
HORVU.MOREX.r2.1HG0006800	0.544305	17.4063	0.307251	13.5176	- && - && -	-
HORVU.MOREX.r2.6HG0489720	0.503101	7.86364	0.237825	5.95408	- && - && -	-
novel.795	2.41783	13.2974	1.49167	14.5747	- && - && PF04434:SWIM zinc finger	SWIM
HORVU.MOREX.r2.2HG0178200	0.00842788	4.77608	0	2.89317	- && - && PF00931:NB-ARC domain	NB-ARC
HORVU.MOREX.r2.1HG0074930	185.074	43.9453	592.423	32.8221	- && - && -	-
HORVU.MOREX.r2.4HG0279340	0.0375746	2.31107	0.162089	6.57932	- && P22180.1 RecName: Full=Plasma membrane ATPase 1; AltName: Full=Proton pump 1 && PF00690:Cation transporter/ATPase, N-terminus|PF00122:E1-E2 ATPase|PF00702:haloacid dehalogenase-like hydrolase	E1-E2_ATPase
HORVU.MOREX.r2.2HG0129840	0.193668	4.95309	0.286627	7.44797	- && - && -	-
HORVU.MOREX.r2.2HG0149820	115.482	11.973	817.113	20.3793	- && Q7FAX1.1 RecName: Full=Peroxygenase >A2XVG1.1 RecName: Full=Peroxygenase && PF05042:Caleosin related protein	-
HORVU.MOREX.r2.7HG0589710	138.87	247.782	40.4779	278.262	- && - && -	-
HORVU.MOREX.r2.6HG0498680	27.9181	4.50745	100.406	10.5187	- && Q9XEA8.1 RecName: Full=Cysteine synthase; Short=CSase; AltName: Full=O-acetylserine (thiol)-lyase; Short=OAS-TL; AltName: Full=O-acetylserine sulfhydrylase && PF00291:Pyridoxal-phosphate dependent enzyme	PALP
HORVU.MOREX.r2.UnG0636180	20.1063	60.1894	5.83155	70.4082	- && P05698.2 RecName: Full=Ribulose bisphosphate carboxylase large chain; Short=RuBisCO large subunit; Flags: Precursor && PF00016:Ribulose bisphosphate carboxylase large chain, catalytic domain	RuBisCO_large
HORVU.MOREX.r2.7HG0608620	0.578484	27.9715	0.368738	19.393	- && - && -	-
HORVU.MOREX.r2.5HG0426890	0	7.02178	0	6.64006	- && - && PF03004:Plant transposase (Ptta/En/Spm family)	-
novel.1771	0.147433	5.70711	0.149223	5.2448	- && - && -	-
HORVU.MOREX.r2.UnG0626230	2.30353	0.369421	33.1006	3.32492	- && - && -	-
HORVU.MOREX.r2.4HG0335550	109.951	20.8269	346.419	16.5435	- && - && PF09366:Protein of unknown function (DUF1997)	-
HORVU.MOREX.r2.6HG0486210	6.95313	23.6483	2.80536	27.0567	- && P05698.2 RecName: Full=Ribulose bisphosphate carboxylase large chain; Short=RuBisCO large subunit; Flags: Precursor && PF00016:Ribulose bisphosphate carboxylase large chain, catalytic domain|PF02788:Ribulose bisphosphate carboxylase large chain, N-te	RuBisCO_large
HORVU.MOREX.r2.2HG0155090	9.50104	27.8792	2.66515	34.8399	- && Q7XU38.3 RecName: Full=Cytochrome P450 87A3 && PF00067:Cytochrome P450	p450
HORVU.MOREX.r2.2HG0142330	70.5062	10.4594	154.994	8.35044	- && - && -	-
HORVU.MOREX.r2.7HG0606060	4.24472	1.62493	70.9743	2.43036	- && P22242.1 RecName: Full=Desiccation-related protein PCC13-62; Flags: Precursor [Craterostigma plantagineum] && PF13668:Ferritin-like domain	-
HORVU.MOREX.r2.3HG0183930	6.80145	1.0318	14.0943	0.707243	- && Q9CAL3.1 RecName: Full=Cysteine-rich receptor-like protein kinase 2; Short=Cysteine-rich RLK2; Flags: Precursor && PF00069:Protein kinase domain|PF01657:Salt stress response/antifungal	Pkinase
HORVU.MOREX.r2.5HG0434090	7.1739	12.7932	0.570189	7.88074	- && P04784.1 RecName: Full=Chlorophyll a-b binding protein, chloroplastic; AltName: Full=LHCII type I CAB; Short=LHCP; Flags: Precursor && PF00504:Chlorophyll A-B binding protein	-
HORVU.MOREX.r2.UnG0633480	0.629917	18.5779	0.4494	16.1671	- && Q95H54.3 RecName: Full=50S ribosomal protein L20, chloroplastic >A1E9L3.1 RecName: Full=50S ribosomal protein L20, chloroplastic && PF00453:Ribosomal protein L20	-
HORVU.MOREX.r2.5HG0401200	9.23219	22.923	2.34803	14.4895	- && Q53QK0.1 RecName: Full=Flavonoid O-methyltransferase-like protein Os11g0303600 && PF00891:O-methyltransferase|PF08100:Dimerisation domain	-
HORVU.MOREX.r2.UnG0633510	4.38637	22.8778	2.49928	24.9941	- && Q9MTN7.2 RecName: Full=Photosystem I P700 chlorophyll a apoprotein A2; AltName: Full=PSI-B; AltName: Full=PsaB && PF00223:Photosystem I psaA/psaB protein	-
HORVU.MOREX.r2.1HG0000660	2.88441	0.38764	10.6639	0.153289	- && F4JJ23.1 RecName: Full=Protein NEN4; AltName: Full=NAC45/NAC86-dependent exonuclease-domain protein 4 && -	-
HORVU.MOREX.r2.3HG0242240	2.80303	0.0903257	16.2544	0.609351	- && - && -	-
HORVU.MOREX.r2.UnG0628810	0.998607	11.5251	0.675844	12.1215	- && P20454.2 RecName: Full=Photosystem I assembly protein Ycf4 && PF02392:Ycf4	-
HORVU.MOREX.r2.3HG0190020	2.06627	0.440993	9.75349	0.142949	- && Q43257.1 RecName: Full=indole-2-monooxygenase; AltName: Full=Cytochrome P450 71C4; AltName: Full=Protein benzoxazineless 2 && PF00067:Cytochrome P450	p450
HORVU.MOREX.r2.1HG0074610	0.681365	0.160562	7.27951	0.248186	- && Q65XK7.1 RecName: Full=Probable protein phosphatase 2C 51; Short=OsPP2C51 && PF00481:Protein phosphatase 2C	PP2C
HORVU.MOREX.r2.1HG0064190	3.51705	20.7549	3.84121	31.7235	- && Q5ZBY9.1 RecName: Full=Photosystem II reaction center W protein, chloroplastic; AltName: Full=PSII 6.1 kDa protein; Flags: Precursor && PF07123:Photosystem II reaction centre W protein (PsbW)	-
HORVU.MOREX.r2.3HG0226400	1.60756	24.2759	0.834527	17.5356	- && Q9SA52.1 RecName: Full=Chloroplast stem-loop binding protein of 41 kDa b, chloroplastic; Short=CSP41-b; AltName: Full=Heteroglycan-interacting protein 1.3; AltName: Full=Protein CHLOROPLAST RNA BINDING; AltName: Full=Protein Gb5f; Flags: Precursor &&	Epimerase
HORVU.MOREX.r2.5HG0425220	6.57455	22.0382	2.30884	18.0673	- && - && PF02298:Plastocyanin-like domain	Cu_bind_like
novel.1091	0	2.70751	0	2.96396	- && - && -	-
HORVU.MOREX.r2.4HG0323980	3.2459	0.85324	22.8102	0.813137	- && - && -	-
HORVU.MOREX.r2.3HG0193420	5.14064	1.06157	9.97205	1.53948	- && Q8L5Z1.1 RecName: Full=GDSL esterase/lipase At1g33811; AltName: Full=Extracellular lipase At1g33811; Flags: Precursor && PF00657:GDSL-like Lipase/Acylhydrolase	Lipase_GDSL
HORVU.MOREX.r2.5HG0355750	2.07836	0.500034	18.6522	1.72569	- && Q84WN3.2 RecName: Full=Bidirectional sugar transporter SWEET17; Short=AtSWEET17; AltName: Full=Protein SUGARS WILL EVENTUALLY BE EXPORTED TRANSPORTERS 17 && PF03083:Sugar efflux transporter for intercellular exchange	-
HORVU.MOREX.r2.5HG0418660	12.2833	4.46967	66.6111	5.92813	- && - && PF00190:Cupin	-
HORVU.MOREX.r2.7HG0608630	0.753195	31.2582	0.722908	20.9889	- && - && PF02902:Ulp1 protease family, C-terminal catalytic domain	Peptidase_C48
HORVU.MOREX.r2.3HG0241800	6.25914	18.4728	1.27576	16.0171	- && Q9FL87.1 RecName: Full=Protein CHLORORESPIRATORY REDUCTION 7, chloroplastic; Flags: Precursor && PF12095:Protein of unknown function (DUF3571)	-
HORVU.MOREX.r2.6HG0467720	5.80147	27.9803	1.38902	37.8409	- && - && -	-
HORVU.MOREX.r2.1HG0053700	40.9663	11.5959	71.2035	5.2594	- && - && -	-
HORVU.MOREX.r2.5HG0392330	2.6813	0.537647	28.1373	3.45634	- && Q0J2L7.2 RecName: Full=Probable protein phosphatase 2C 68; Short=OsPP2C68 && PF00481:Protein phosphatase 2C	PP2C
HORVU.MOREX.r2.2HG0141340	44.5943	19.9145	201.118	22.8644	- && - && PF12937:F-box-like	-
HORVU.MOREX.r2.5HG0413910	128.106	38.7348	387.734	34.8685	- && Q652K1.1 RecName: Full=Protein STAY-GREEN, chloroplastic; AltName: Full=Protein STAYGREEN; Flags: Precursor && PF12638:Staygreen protein	-
HORVU.MOREX.r2.2HG0160590	19.6351	3.21924	111.01	5.19171	- && O23913.1 RecName: Full=Ubiquinol oxidase 1b, mitochondrial; AltName: Full=Alternative oxidase 1b; Flags: Precursor && PF01786:Alternative oxidase	AOX
HORVU.MOREX.r2.5HG0423380	5.02674	0.755045	5.15619	0.83162	- && P0CH27.1 RecName: Full=Ubiquitin-60S ribosomal protein L40; Contains: RecName: Full=Ubiquitin; Contains: RecName: Full=60S ribosomal protein L40; Flags: Precursor && PF00240:Ubiquitin family	ubiquitin
HORVU.MOREX.r2.UnG0628820	22.4747	75.344	8.96366	87.9541	- && P05698.2 RecName: Full=Ribulose bisphosphate carboxylase large chain; Short=RuBisCO large subunit; Flags: Precursor && PF02788:Ribulose bisphosphate carboxylase large chain, N-terminal domain	-
novel.886	0	1.76823	0	3.89454	- && - && -	-
HORVU.MOREX.r2.3HG0254170	0.69306	0.0962942	6.83883	0.255989	- && P43156.1 RecName: Full=Thiol protease SEN102; Flags: Precursor && PF00112:Papain family cysteine protease|PF08246:Cathepsin propeptide inhibitor domain (I29)	Peptidase_C1
HORVU.MOREX.r2.7HG0527840	0.0457044	0.0211327	2.64648	0.0545613	- && Q9FSV7.1 RecName: Full=Sucrose:sucrose 1-fructosyltransferase; AltName: Full=Sucrose 1(F)-fructosyltransferase; AltName: Full=Sucrose:sucrose 1(F)-beta-D-fructosyltransferase; Flags: Precursor && PF00251:Glycosyl hydrolases family 32 N-terminal domai	-
HORVU.MOREX.r2.2HG0159220	4.96826	0.854975	15.9107	1.3297	- && Q94CD1.1 RecName: Full=Omega-hydroxypalmitate O-feruloyl transferase; AltName: Full=Omega-hydroxyacid hydroxycinnamoyltransferase; AltName: Full=Protein ALIPHATIC SUBERIN FERULOYL TRANSFERASE && PF02458:Transferase family	-
HORVU.MOREX.r2.6HG0519230	18.0213	53.3741	2.66887	26.6189	- && - && -	-
HORVU.MOREX.r2.4HG0323130	114.777	18.9603	327.789	28.5106	- && - && PF13419:Haloacid dehalogenase-like hydrolase	-
novel.1411	0.19983	3.89348	0.294468	3.71075	- && O22285.1 RecName: Full=Probable methyltransferase PMT11 && -	-
HORVU.MOREX.r2.6HG0479070	0.06136	5.43571	0.391686	8.66737	- && - && -	-
HORVU.MOREX.r2.5HG0363420	20.5103	3.31303	78.9837	3.27461	- && O22533.1 RecName: Full=Zinc finger protein ZAT6; AltName: Full=COLD INDUCED ZINC FINGER PROTEIN 2 && PF13912:C2H2-type zinc finger	-
HORVU.MOREX.r2.7HG0595850	2.48541	0.2566	13.1505	0.280228	- && - && -	-
HORVU.MOREX.r2.2HG0134800	2.69606	24.2736	1.47904	25.8848	- && P69694.1 RecName: Full=Photosystem II reaction center protein K; Short=PSII-K; Flags: Precursor >P69693.1 RecName: Full=Photosystem II reaction center protein K; Short=PSII-K; Flags: Precursor && PF02533:Photosystem II 4 kDa reaction centre component	-
HORVU.MOREX.r2.6HG0504120	12.9027	14.7655	0.565917	7.44595	- && Q67U69.1 RecName: Full=Formate dehydrogenase 2, mitochondrial; Short=FDH 2; AltName: Full=NAD-dependent formate dehydrogenase 2; Flags: Precursor && PF02826:D-isomer specific 2-hydroxyacid dehydrogenase, NAD binding domain	2-Hacid_dh_C
HORVU.MOREX.r2.1HG0073880	1005.37	185.285	2382	171.031	- && Q53QK0.1 RecName: Full=Flavonoid O-methyltransferase-like protein Os11g0303600 && PF00891:O-methyltransferase|PF08100:Dimerisation domain	-
HORVU.MOREX.r2.4HG0325040	1.11435	3.76085	0.0425131	3.05367	- && B9FGV7.1 RecName: Full=Solute carrier family 40 member 3, chloroplastic; Flags: Precursor && PF06963:Ferroportin1 (FPN1)	-
novel.334	0	1.73741	0	1.33508	- && - && -	-
novel.553	0.102822	2.26768	0.0540485	1.70456	- && A1E9I2.1 RecName: Full=DNA-directed RNA polymerase subunit beta'; AltName: Full=PEP; AltName: Full=Plastid-encoded RNA polymerase subunit beta'; Short=RNA polymerase subunit beta' && PF05000:RNA polymerase Rpb1, domain 4|PF00623:RNA polymerase Rpb1,	-
HORVU.MOREX.r2.2HG0086010	4.5434	8.83233	1.16657	15.9518	- && P26667.1 RecName: Full=Ribulose bisphosphate carboxylase small chain PW9, chloroplastic; Short=RuBisCO small subunit PW9; Flags: Precursor && PF12338:Ribulose-1,5-bisphosphate carboxylase small subunit|PF00101:Ribulose bisphosphate carboxylase, small	-
HORVU.MOREX.r2.7HG0597270	2.02443	86.9167	16.3392	324.86	- && O64411.1 RecName: Full=Polyamine oxidase; Flags: Precursor && PF01593:Flavin containing amine oxidoreductase	Amino_oxidase
HORVU.MOREX.r2.3HG0212380	0.211905	11.4628	0.407062	10.1648	- && - && -	-
HORVU.MOREX.r2.7HG0604310	2.83351	0.280435	29.3143	1.23511	- && Q5Z6F5.1 RecName: Full=Probable protein phosphatase 2C 59; Short=OsPP2C59; Flags: Precursor && PF00481:Protein phosphatase 2C	PP2C
HORVU.MOREX.r2.2HG0176690	7.02467	44.061	4.16584	35.8336	- && P69694.1 RecName: Full=Photosystem II reaction center protein K; Short=PSII-K; Flags: Precursor >P69693.1 RecName: Full=Photosystem II reaction center protein K; Short=PSII-K; Flags: Precursor && PF02533:Photosystem II 4 kDa reaction centre component	-
HORVU.MOREX.r2.7HG0572820	38.9585	10.289	127.276	10.8339	- && Q67Y83.2 RecName: Full=Serine carboxypeptidase-like 51; Flags: Precursor && PF00450:Serine carboxypeptidase	Peptidase_S10
HORVU.MOREX.r2.6HG0517650	3.61755	20.6085	1.36413	40.7753	- && Q9SDZ9.1 RecName: Full=Purple acid phosphatase 2; AltName: Full=Manganese(II) purple acid phosphatase 2; Flags: Precursor && PF14008:Iron/zinc purple acid phosphatase-like protein C|PF16656:Purple acid Phosphatase, N-terminal domain|PF00149:Calcineur	Metallophos
HORVU.MOREX.r2.3HG0232400	21.7272	5.64109	114.81	7.36694	- && Q93ZR6.1 RecName: Full=O-acyltransferase WSD1; AltName: Full=Diacylglycerol O-acyltransferase; Short=DGAT; AltName: Full=Long-chain-alcohol O-fatty-acyltransferase; AltName: Full=Wax synthase; Short=WS && PF06974:Protein of unknown function (DUF1298)	-
HORVU.MOREX.r2.4HG0335630	3.6784	6.2089	1.76705	8.92081	- && Q9C788.1 RecName: Full=Cytochrome P450 704B1; AltName: Full=Long-chain fatty acid omega-hydroxylase && PF00067:Cytochrome P450	p450
HORVU.MOREX.r2.2HG0126480	16.725	4.57653	64.6388	6.92207	- && Q40070.1 RecName: Full=Photosystem II 10 kDa polypeptide, chloroplastic; Flags: Precursor && PF04725:Photosystem II 10 kDa polypeptide PsbR	-
HORVU.MOREX.r2.7HG0610820	1.10297	0.217928	5.73318	0.389935	- && Q43257.1 RecName: Full=indole-2-monooxygenase; AltName: Full=Cytochrome P450 71C4; AltName: Full=Protein benzoxazineless 2 && PF00067:Cytochrome P450	p450
HORVU.MOREX.r2.3HG0245240	3.30072	2.03931	28.1915	3.38493	- && Q0JIL1.1 RecName: Full=Probable nucleoredoxin 2; Short=OsNrx2 && PF13905:Thioredoxin-like	-
HORVU.MOREX.r2.1HG0072930	51.0839	146.608	34.1406	202.687	- && P51373.1 RecName: Full=Uncharacterized protein ycf23 (chloroplast) [Porphyra purpurea] && PF04481:Protein of unknown function (DUF561)	-
HORVU.MOREX.r2.5HG0351790	2.99281	21.4903	0.925973	19.24	- && Q6ENX9.1 RecName: Full=Photosystem II reaction center protein Z; Short=PSII-Z >P69695.1 RecName: Full=Photosystem II reaction center protein Z; Short=PSII-Z >P69696.1 RecName: Full=Photosystem II reaction center protein Z; Short=PSII-Z >Q6L3B0.1 RecN	-
HORVU.MOREX.r2.3HG0265860	35.388	51.3878	2.72561	35.0299	- && Q02126.1 RecName: Full=Glucan endo-1,3-beta-glucosidase GIII; AltName: Full=(1->3)-beta-glucan endohydrolase GIII; AltName: Full=(1->3)-beta-glucanase isoenzyme GIII; AltName: Full=Beta-1,3-endoglucanase GIII; Flags: Precursor && PF00332:Glycosyl hyd	Glyco_hydro_17
HORVU.MOREX.r2.2HG0097430	5.1765	1.2461	15.084	2.25591	- && - && -	-
HORVU.MOREX.r2.1HG0047370	4.99682	1.41287	27.1279	2.8739	- && Q9LPV8.1 RecName: Full=Eukaryotic peptide chain release factor subunit 1-2; Short=Eukaryotic release factor 1-2; Short=eRF1-2; AltName: Full=Omnipotent suppressor protein 1 homolog 2; Short=SUP1 homolog 2 && PF03465:eRF1 domain 3|PF03463:eRF1 domain	-
HORVU.MOREX.r2.5HG0424190	37.6014	15.9967	167.081	12.8777	- && A7LXU3.1 RecName: Full=Beta-glucosidase BoGH3B; AltName: Full=Glycosyl hydrolase family protein 3B; Short=BoGH3B; Flags: Precursor && PF01915:Glycosyl hydrolase family 3 C-terminal domain|PF00933:Glycosyl hydrolase family 3 N terminal domain	Glyco_hydro_3
HORVU.MOREX.r2.7HG0545310	185.387	111.33	460.88	113.322	- && Q8W496.1 RecName: Full=Protochlorophyllide-dependent translocon component 52, chloroplastic; AltName: Full=ACD1-like protein; AltName: Full=Protein TIC 55-IV; AltName: Full=Translocon at the inner envelope membrane of chloroplasts 55-IV; Flags: Precu	-
novel.429	0.0282698	1.93852	0	1.66863	- && - && PF02902:Ulp1 protease family, C-terminal catalytic domain	Peptidase_C48
HORVU.MOREX.r2.5HG0439150	22.8733	45.182	10.4773	37.0103	- && A2XNK3.1 RecName: Full=Anthranilate synthase alpha subunit 1, chloroplastic; Flags: Precursor && PF04715:Anthranilate synthase component I, N terminal region|PF00425:chorismate binding enzyme	-
HORVU.MOREX.r2.2HG0159860	64.2937	12.6755	178.792	14.6918	- && Q9FKL8.1 RecName: Full=Putative xyloglucan endotransglucosylase/hydrolase protein 13; Short=At-XTH13; Short=XTH-13; Flags: Precursor && PF00722:Glycosyl hydrolases family 16|PF06955:Xyloglucan endo-transglycosylase (XET) C-terminus	-
HORVU.MOREX.r2.2HG0094020	10.3691	1.88854	89.5382	5.96639	- && P19515.2 RecName: Full=Lipase; AltName: Full=Triacylglycerol lipase; Flags: Precursor && PF01764:Lipase (class 3)	Lipase_3
HORVU.MOREX.r2.4HG0336950	1.89169	0.02686	10.3436	0	- && - && PF12695:Alpha/beta hydrolase family	-
HORVU.MOREX.r2.4HG0335570	0.982532	0.106585	5.39962	0.248582	- && - && PF02987:Late embryogenesis abundant protein	-
HORVU.MOREX.r2.3HG0227190	3.43437	1.86784	14.3222	1.27806	- && Q8LBB2.2 RecName: Full=SNF1-related protein kinase regulatory subunit gamma-1; Short=AKIN subunit gamma-1; Short=AKING1; Short=AKINgamma1; AltName: Full=CBS domain-containing protein CBSCBS1 && -	-
HORVU.MOREX.r2.6HG0498800	0	13.6594	0	12.5238	- && - && -	-
HORVU.MOREX.r2.3HG0203620	1.85624	0.371827	8.36823	0.360005	- && Q8VY22.1 RecName: Full=Protein trichome birefringence-like 38 && PF14416:PMR5 N terminal Domain|PF13839:GDSL/SGNH-like Acyl-Esterase family found in Pmr5 and Cas1p	-
HORVU.MOREX.r2.5HG0392950	16.4818	2.41905	64.3143	2.86257	- && C0LGR6.2 RecName: Full=Probable LRR receptor-like serine/threonine-protein kinase At4g29180; Flags: Precursor && PF07714:Protein tyrosine kinase|PF12819:Carbohydrate-binding protein of the ER|PF13855:Leucine rich repeat	Pkinase_Tyr
HORVU.MOREX.r2.3HG0255060	0.193094	0	5.77161	0.140961	- && Q00742.1 RecName: Full=Dehydrin Rab15 && PF00257:Dehydrin	-
HORVU.MOREX.r2.UnG0633460	0.953325	24.7796	0.612597	19.1485	- && Q95H56.1 RecName: Full=50S ribosomal protein L33, chloroplastic >A1EA29.1 RecName: Full=50S ribosomal protein L33, chloroplastic >A1E9L1.1 RecName: Full=50S ribosomal protein L33, chloroplastic >A8Y9A7.1 RecName: Full=50S ribosomal protein L33, chlor	-
HORVU.MOREX.r2.5HG0397870	4.20648	0.522252	5.25484	0.286858	- && Q8GXZ3.1 RecName: Full=Serine/threonine-protein kinase At5g01020 && PF07714:Protein tyrosine kinase	Pkinase_Tyr
HORVU.MOREX.r2.2HG0128660	5.32928	0.834693	10.8102	0.704461	- && P93147.2 RecName: Full=Isoflavone 2'-hydroxylase; AltName: Full=CYP GE-3; AltName: Full=Cytochrome P450 81E1; AltName: Full=Cytochrome P450 91A4 && PF00067:Cytochrome P450	p450
HORVU.MOREX.r2.6HG0512770	5.60734	2.28199	36.3901	6.38522	- && - && PF00582:Universal stress protein family	Usp
HORVU.MOREX.r2.5HG0367070	4.04826	0.583186	19.3101	0.997338	- && Q9LDE1.1 RecName: Full=Transcription factor MYB108; AltName: Full=Myb-related protein 108; Short=AtMYB108; AltName: Full=Protein BOTRYTIS-SUSCEPTIBLE 1 && PF00249:Myb-like DNA-binding domain	Myb_DNA-binding
HORVU.MOREX.r2.3HG0260290	74.3339	18.6368	127.477	8.44689	- && Q06398.2 RecName: Full=Probable glutathione S-transferase GSTU6; AltName: Full=28 kDa cold-induced protein && PF13417:Glutathione S-transferase, N-terminal domain|PF13410:Glutathione S-transferase, C-terminal domain	-
HORVU.MOREX.r2.UnG0635360	0.313427	9.34183	0.109984	7.12351	- && O98693.2 RecName: Full=NAD(P)H-quinone oxidoreductase subunit 6, chloroplastic; AltName: Full=NAD(P)H dehydrogenase subunit 6; AltName: Full=NADH-plastoquinone oxidoreductase subunit 6 && PF00499:NADH-ubiquinone/plastoquinone oxidoreductase chain 6	-
HORVU.MOREX.r2.4HG0335580	2.84299	0.508016	11.6877	0.511253	- && Q3U481.1 RecName: Full=Major facilitator superfamily domain-containing protein 12 && PF13347:MFS/sugar transport protein	-
novel.18	0.00604847	1.98968	0	1.59561	- && Q6AVI0.1 RecName: Full=Zinc finger BED domain-containing protein RICESLEEPER 2; AltName: Full=Transposase-like protein RICESLEEPER 2 && PF05699:hAT family C-terminal dimerisation region|PF14372:Domain of unknown function (DUF4413)	hATC
HORVU.MOREX.r2.4HG0277700	44.8943	52.6327	5.6494	33.9422	- && Q9C983.1 RecName: Full=Probable WRKY transcription factor 57; AltName: Full=WRKY DNA-binding protein 57 && PF03106:WRKY DNA -binding domain	WRKY
HORVU.MOREX.r2.2HG0137180	1.11289	13.8443	0.654239	10.1138	- && - && -	-
HORVU.MOREX.r2.6HG0514580	2.67948	0.994339	12.3948	1.18847	- && Q84RK2.2 RecName: Full=Fatty-acid-binding protein 2; Short=AtFAP2; AltName: Full=Chalcone-flavanone isomerase family protein 2 && PF02431:Chalcone-flavanone isomerase	-
HORVU.MOREX.r2.5HG0364990	24.9636	10.4246	95.1745	11.9807	- && Q9FLR0.1 RecName: Full=Protein NEN1; AltName: Full=NAC45/NAC86-dependent exonuclease-domain protein 1 && PF00929:Exonuclease	Exonuc_X-T
HORVU.MOREX.r2.1HG0073960	512.441	91.1022	1396.73	92.0503	- && Q84N28.1 RecName: Full=Flavone O-methyltransferase 1; AltName: Full=Caffeic acid O-methyltransferase; Short=TaCOMT1 && PF08100:Dimerisation domain|PF00891:O-methyltransferase	-
HORVU.MOREX.r2.1HG0040710	1.15124	5.46563	0.967918	6.22023	- && - && -	-
novel.935	0	1.31306	0	1.85368	- && - && -	-
novel.1379	0.704607	8.69686	0.902907	7.29871	- && - && PF04493:Endonuclease V	-
HORVU.MOREX.r2.3HG0212390	0.165864	8.26916	0.213771	9.56903	- && - && -	-
HORVU.MOREX.r2.5HG0353830	13.4828	8.45227	54.4493	10.6899	- && Q9C585.2 RecName: Full=Ubiquitin carboxyl-terminal hydrolase 8; AltName: Full=Deubiquitinating enzyme 8; Short=AtUBP8; AltName: Full=Ubiquitin thioesterase 8; AltName: Full=Ubiquitin-specific-processing protease 8 && PF00443:Ubiquitin carboxyl-termin	UCH
novel.1389	0.207919	2.82303	0.129509	2.72335	- && A1EA56.1 RecName: Full=NAD(P)H-quinone oxidoreductase subunit 5, chloroplastic; AltName: Full=NAD(P)H dehydrogenase subunit 5; AltName: Full=NADH-plastoquinone oxidoreductase subunit 5 && PF00312:Ribosomal protein S15	-
HORVU.MOREX.r2.2HG0081860	7.07907	2.37461	11.7002	0.929466	- && Q9SRQ1.1 RecName: Full=Cytochrome P450 89A9 && PF00067:Cytochrome P450	p450
HORVU.MOREX.r2.1HG0065240	0.948229	0.0907272	11.5701	0.119358	- && P14928.1 RecName: Full=ABA-inducible protein PHV A1 && -	-
HORVU.MOREX.r2.1HG0007880	7.86624	0.46469	10.7746	0.105418	- && B8BKP4.1 RecName: Full=Bidirectional sugar transporter SWEET14; Short=OsSWEET14 && PF03083:Sugar efflux transporter for intercellular exchange	-
HORVU.MOREX.r2.2HG0125580	0	17.7601	0	13.7539	- && - && -	-
HORVU.MOREX.r2.1HG0052860	147.654	234.37	89.4439	247.36	- && - && -	-
HORVU.MOREX.r2.1HG0074040	7.88745	2.61076	36.1646	3.2637	- && O49627.1 RecName: Full=Iron-sulfur cluster assembly protein 1; Short=AtISU1; Short=Protein ISCU-LIKE 1; AltName: Full=NifU-like N-terminal domain-containing protein ISU1; AltName: Full=NifU-like protein ISU1; Flags: Precursor && PF01592:NifU-like N t	-
novel.552	3.3154	10.4243	2.02359	11.5298	- && A8Y9F6.1 RecName: Full=Photosystem II CP43 reaction center protein; AltName: Full=PSII 43 kDa protein; AltName: Full=Protein CP-43; Flags: Precursor && PF00421:Photosystem II protein	-
HORVU.MOREX.r2.2HG0153830	0	3.24487	0.0659901	4.25371	- && - && PF01657:Salt stress response/antifungal	-
HORVU.MOREX.r2.2HG0149830	1.63261	0.122147	20.4062	0.809973	- && Q7FAX1.1 RecName: Full=Peroxygenase >A2XVG1.1 RecName: Full=Peroxygenase && PF05042:Caleosin related protein	-
novel.734	0.276423	0.0984579	1.01388	0.134854	- && - && -	-
HORVU.MOREX.r2.3HG0239130	3.07799	2.40613	14.2829	3.56411	- && P12628.1 RecName: Full=NADP-dependent malic enzyme; Short=NADP-ME && PF03949:Malic enzyme, NAD binding domain|PF00390:Malic enzyme, N-terminal domain	Malic_M
HORVU.MOREX.r2.7HG0615690	28.6652	9.8577	115.205	16.2156	- && - && -	-
HORVU.MOREX.r2.2HG0177550	0.691155	1.90269	0.0795839	1.41899	- && Q93W34.1 RecName: Full=Polyadenylate-binding protein RBP45C; Short=Poly(A)-binding protein RBP45C; AltName: Full=RNA-binding protein 45C; Short=AtRBP45C && PF00076:RNA recognition motif. (a.k.a. RRM, RBD, or RNP domain)	RRM_1
HORVU.MOREX.r2.1HG0031680	103.13	45.7256	250.266	37.3764	- && - && PF07063:Domain of unknown function (DUF1338)	-
HORVU.MOREX.r2.1HG0055870	3.30394	1.23861	8.11609	1.87211	- && Q0DH40.1 RecName: Full=Cyclin-B1-5; AltName: Full=G2/mitotic-specific cyclin-B1-5; Short=CycB1;5 && PF02984:Cyclin, C-terminal domain|PF00134:Cyclin, N-terminal domain	Cyclin_C
HORVU.MOREX.r2.UnG0634780	1.42606	8.40975	0.141066	8.94513	- && P69443.1 RecName: Full=ATP synthase epsilon chain, chloroplastic; AltName: Full=ATP synthase F1 sector epsilon subunit; AltName: Full=F-ATPase epsilon subunit >P69444.1 RecName: Full=ATP synthase epsilon chain, chloroplastic; AltName: Full=ATP syntha	-
HORVU.MOREX.r2.2HG0105250	4.27949	13.2095	2.56745	13.2057	- && P51105.1 RecName: Full=Dihydroflavonol 4-reductase; Short=DFR; AltName: Full=Dihydrokaempferol 4-reductase; AltName: Full=Flavanone 4-reductase; Short=FNR && PF01370:NAD dependent epimerase/dehydratase family	Epimerase
HORVU.MOREX.r2.4HG0288970	10.4559	1.40574	81.8978	4.50492	- && - && -	-
HORVU.MOREX.r2.4HG0337670	17.0885	10.6877	32.9906	2.93417	- && A2WK50.2 RecName: Full=Bowman-Birk type bran trypsin inhibitor; AltName: Full=OSE727A; AltName: Full=Protein RBBI3-3; AltName: Full=RBTI; Flags: Precursor && -	-
HORVU.MOREX.r2.1HG0073870	4.08433	0.827143	13.4756	0.683459	- && Q93YP9.1 RecName: Full=Sugar transporter ERD6-like 4 && PF00083:Sugar (and other) transporter	Sugar_tr
HORVU.MOREX.r2.2HG0154040	0.114159	10.047	0.26129	6.18621	- && - && PF02902:Ulp1 protease family, C-terminal catalytic domain	Peptidase_C48
HORVU.MOREX.r2.3HG0235350	2.96047	1.04738	11.6385	1.05169	- && Q5N8F2.1 RecName: Full=IAA-amino acid hydrolase ILR1-like 2; Flags: Precursor && PF07687:Peptidase dimerisation domain|PF01546:Peptidase family M20/M25/M40	Peptidase_M20
HORVU.MOREX.r2.2HG0144690	0.839831	0.163653	3.45886	0.276949	- && B8AVF0.1 RecName: Full=Beta-glucosidase 12; Flags: Precursor && PF00232:Glycosyl hydrolase family 1	Glyco_hydro_1
HORVU.MOREX.r2.4HG0329070	2.11009	8.21937	0.611303	10.5863	- && O81117.2 RecName: Full=Cytochrome P450 94A1; AltName: Full=P450-dependent fatty acid omega-hydroxylase && PF00067:Cytochrome P450	p450
HORVU.MOREX.r2.2HG0080890	5.02697	0.815549	9.59806	0.557953	- && P93596.1 RecName: Full=Obtusifoliol 14-alpha demethylase; AltName: Full=CYPLI; AltName: Full=Cytochrome P450 51; AltName: Full=Cytochrome P450-LIA1 && PF00067:Cytochrome P450	p450
HORVU.MOREX.r2.1HG0058240	1.69246	0.0353445	5.91719	0.0774543	- && Q9SIZ6.1 RecName: Full=GDSL esterase/lipase At2g40250; AltName: Full=Extracellular lipase At2g40250; Flags: Precursor && PF00657:GDSL-like Lipase/Acylhydrolase	Lipase_GDSL
HORVU.MOREX.r2.3HG0259580	31.0244	221.207	18.5906	231.424	- && Q9XJ61.1 RecName: Full=MADS-box transcription factor 51; Short=OsMADS51; AltName: Full=OsMADS65 && -	-
HORVU.MOREX.r2.4HG0344450	4.05777	23.4649	5.81315	29.7225	- && Q53QK0.1 RecName: Full=Flavonoid O-methyltransferase-like protein Os11g0303600 && PF00891:O-methyltransferase|PF08100:Dimerisation domain	-
HORVU.MOREX.r2.2HG0083970	53.7005	18.0767	176.492	12.9568	- && Q55EX9.2 RecName: Full=Putative methyltransferase DDB_G0268948 && PF08241:Methyltransferase domain	Methyltransf_11
HORVU.MOREX.r2.UnG0635140	1.94646	7.04698	1.00448	8.15381	- && A1EA38.1 RecName: Full=Cytochrome b6 && PF13631:Cytochrome b(N-terminal)/b6/petB	-
HORVU.MOREX.r2.4HG0337410	155.657	262.739	19.7014	130.067	- && C5WYI7.1 RecName: Full=Cyanate hydratase; Short=Cyanase; AltName: Full=Cyanate hydrolase; AltName: Full=Cyanate lyase && -	-
HORVU.MOREX.r2.1HG0038230	1.14599	0.168391	9.24875	0.454377	- && - && -	-
HORVU.MOREX.r2.2HG0165150	1.00264	3.12242	0.379222	3.08878	- && A7LXU3.1 RecName: Full=Beta-glucosidase BoGH3B; AltName: Full=Glycosyl hydrolase family protein 3B; Short=BoGH3B; Flags: Precursor && PF01915:Glycosyl hydrolase family 3 C-terminal domain|PF00933:Glycosyl hydrolase family 3 N terminal domain	Glyco_hydro_3
HORVU.MOREX.r2.6HG0462680	2.52864	0.290164	9.29658	0.264036	- && Q6YXZ4.1 RecName: Full=Protein PHOSPHATE STARVATION RESPONSE 3; Short=OsPHR3 && PF00249:Myb-like DNA-binding domain|PF14379:MYB-CC type transfactor, LHEQLE motif	Myb_DNA-binding
HORVU.MOREX.r2.4HG0290160	5.87652	1.28926	32.9622	1.62612	- && - && -	-
HORVU.MOREX.r2.3HG0246030	3.18507	4.54698	0.79553	4.89812	- && O64733.1 RecName: Full=UDP-glycosyltransferase 87A2 && PF00201:UDP-glucoronosyl and UDP-glucosyl transferase	UDPGT
HORVU.MOREX.r2.5HG0356890	247.875	364.616	59.4091	245.375	- && Q7G8Y5.1 RecName: Full=Glutaredoxin-C1 && PF00462:Glutaredoxin	-
HORVU.MOREX.r2.7HG0620250	66.2014	116.36	11.8288	50.222	- && Q5SMM8.1 RecName: Full=Putrescine hydroxycinnamoyltransferase 1; Short=OsPHT1; AltName: Full=BAHD-like hydroxycinnamoyl transferase HCT3; AltName: Full=Hydroxycinnamoyltransferase 3; Short=OsHCT3 && PF02458:Transferase family	-
HORVU.MOREX.r2.UnG0636500	3.98907	31.9051	2.53011	27.1074	- && P69694.1 RecName: Full=Photosystem II reaction center protein K; Short=PSII-K; Flags: Precursor >P69693.1 RecName: Full=Photosystem II reaction center protein K; Short=PSII-K; Flags: Precursor && PF02533:Photosystem II 4 kDa reaction centre component	-
HORVU.MOREX.r2.6HG0479800	4.14843	1.82678	22.9045	1.46249	- && - && -	-
novel.412	0	2.18677	0	5.7364	- && - && -	-
HORVU.MOREX.r2.6HG0508650	330.45	90.5921	784.851	62.2556	- && Q9LVI9.1 RecName: Full=Dihydropyrimidine dehydrogenase (NADP(+)), chloroplastic; Short=DHPDH; Short=DPD; AltName: Full=Dihydroorotate dehydrogenase-like protein; AltName: Full=Dihydrothymine dehydrogenase; AltName: Full=Dihydrouracil dehydrogenase; A	DHO_dh
HORVU.MOREX.r2.1HG0010160	1.42938	0.165388	11.194	0.234007	- && Q9SK08.2 RecName: Full=LOB domain-containing protein 11; AltName: Full=ASYMMETRIC LEAVES 2-like protein 7; Short=AS2-like protein 7 && PF03195:Protein of unknown function DUF260	-
HORVU.MOREX.r2.UnG0635080	2.30851	9.76227	1.64072	12.1918	- && A1E9J1.1 RecName: Full=Photosystem I P700 chlorophyll a apoprotein A1; AltName: Full=PSI-A; AltName: Full=PsaA && PF00223:Photosystem I psaA/psaB protein	-
HORVU.MOREX.r2.5HG0398150	207.707	82.7035	677.993	75.5294	- && Q9ZPB7.3 RecName: Full=Aldehyde dehydrogenase family 7 member A1; AltName: Full=Antiquitin-1; AltName: Full=Matured fruit 60 kDa protein; Short=MF-60 && PF00171:Aldehyde dehydrogenase family	Aldedh
HORVU.MOREX.r2.3HG0235220	0.0256251	6.88163	0.0867348	6.87497	- && O98692.2 RecName: Full=NAD(P)H-quinone oxidoreductase subunit I, chloroplastic; AltName: Full=NAD(P)H dehydrogenase subunit I; Short=NDH subunit I; AltName: Full=NADH-plastoquinone oxidoreductase subunit I && PF13237:4Fe-4S dicluster domain	-
HORVU.MOREX.r2.5HG0357560	112.136	244.882	13.7308	97.9054	- && Q8GUK7.1 RecName: Full=E3 ubiquitin-protein ligase RMA3; AltName: Full=Protein RING membrane-anchor 3 && PF00097:Zinc finger, C3HC4 type (RING finger)	zf-C3HC4
HORVU.MOREX.r2.4HG0323620	14.7811	6.24569	133.341	25.6836	- && Q84JI0.1 RecName: Full=Probable protein phosphatase 2C 30; Short=OsPP2C30 && PF00481:Protein phosphatase 2C	PP2C
HORVU.MOREX.r2.6HG0469520	0	39.8375	0.067961	24.9984	- && - && -	-
novel.17	8.29162	12.1003	2.11274	10.0706	- && - && -	-
HORVU.MOREX.r2.1HG0040700	0.515421	5.27617	0.43198	4.71846	- && - && -	-
HORVU.MOREX.r2.UnG0635770	14.4006	41.4989	8.71165	40.8218	- && B1VKH0.1 RecName: Full=Photosystem II D2 protein; Short=PSII D2 protein; AltName: Full=Photosystem Q(A) protein && PF00124:Photosynthetic reaction centre protein	Photo_RC
HORVU.MOREX.r2.4HG0279600	115.01	62.5823	349.466	68.2725	- && - && PF04398:Protein of unknown function, DUF538	-
novel.405	0.792694	4.46233	0.498025	2.97268	- && A1E9H9.1 RecName: Full=Photosystem II reaction center protein M; Short=PSII-M && PF05151:Photosystem II reaction centre M protein (PsbM)	-
HORVU.MOREX.r2.5HG0389800	8.58328	2.83136	33.0008	3.48468	- && - && -	-
HORVU.MOREX.r2.5HG0421620	2.28085	0.560696	4.19819	0.679232	- && - && PF13365:Trypsin-like peptidase domain	-
HORVU.MOREX.r2.5HG0367090	26.284	58.1152	8.33763	58.8839	- && O23403.1 RecName: Full=PsbP domain-containing protein 1, chloroplastic; AltName: Full=OEC23-like protein 3; AltName: Full=PsbP-related thylakoid lumenal protein 1; Flags: Precursor && PF01789:PsbP	-
HORVU.MOREX.r2.5HG0406400	0.0719092	6.92455	0	8.17201	- && - && -	-
HORVU.MOREX.r2.1HG0045440	3.08027	1.1544	11.2833	2.81821	- && A2ZAB5.2 RecName: Full=Serine/threonine-protein kinase SAPK3; AltName: Full=Osmotic stress/abscisic acid-activated protein kinase 3; AltName: Full=Protein kinase REK >P0C5D6.1 RecName: Full=Serine/threonine-protein kinase SAPK3; AltName: Full=Osmotic	Pkinase
novel.294	0.980627	6.64149	0.691302	4.65364	- && - && -	-
HORVU.MOREX.r2.1HG0006000	12.5748	46.5079	3.72998	44.7971	- && Q0J6T3.2 RecName: Full=Probable cinnamyl alcohol dehydrogenase 5; Short=OsCAD5 && PF00107:Zinc-binding dehydrogenase|PF08240:Alcohol dehydrogenase GroES-like domain	ADH_N
HORVU.MOREX.r2.6HG0505500	158.887	62.0162	398.964	48.2681	- && - && -	-
HORVU.MOREX.r2.6HG0514200	41.2577	16.4653	206.412	22.7654	- && Q75KD7.1 RecName: Full=Allene oxide cyclase, chloroplastic; Short=OsAOC; AltName: Full=Protein COLEOPTILE PHOTOMORPHOGENESIS 2; AltName: Full=Protein HEBIBA; Flags: Precursor >A2XID3.1 RecName: Full=Allene oxide cyclase, chloroplastic; Short=OsAOC; F	-
HORVU.MOREX.r2.2HG0160700	10.5954	3.85584	56.9422	6.02156	- && - && PF04588:Hypoxia induced protein conserved region	-
HORVU.MOREX.r2.4HG0280140	6.88289	2.96976	27.5824	6.04589	- && - && PF13419:Haloacid dehalogenase-like hydrolase	-
HORVU.MOREX.r2.3HG0259910	2.13863	18.6132	1.35845	14.5711	- && Q9XJ61.1 RecName: Full=MADS-box transcription factor 51; Short=OsMADS51; AltName: Full=OsMADS65 && -	-
HORVU.MOREX.r2.2HG0134850	0.445539	9.15083	0.126899	6.91512	- && P12339.2 RecName: Full=30S ribosomal protein S7, chloroplastic >Q6ENQ9.1 RecName: Full=30S ribosomal protein S7, chloroplastic >Q6L3C6.1 RecName: Full=30S ribosomal protein S7, chloroplastic >A1EA53.1 RecName: Full=30S ribosomal protein S7, chloropla	-
HORVU.MOREX.r2.1HG0017340	0	6.04574	0	6.40372	- && - && -	-
HORVU.MOREX.r2.6HG0514820	6.83886	3.20557	28.7678	2.72352	- && Q9LVJ1.1 RecName: Full=Subtilisin-like protease SBT1.4; AltName: Full=Subtilase subfamily 1 member 4; Short=AtSBT1.4; Flags: Precursor && PF05922:Peptidase inhibitor I9|PF00082:Subtilase family|PF02225:PA domain	Peptidase_S8
HORVU.MOREX.r2.3HG0267820	103.427	23.3199	230.085	28.3374	- && O24592.2 RecName: Full=9-cis-epoxycarotenoid dioxygenase 1, chloroplastic; AltName: Full=Protein VIVIPAROUS14; Short=VP-14; Short=VP14; Flags: Precursor && PF03055:Retinal pigment epithelial membrane protein	RPE65
HORVU.MOREX.r2.2HG0139750	6.55651	1.5318	15.419	1.57536	- && Q9ZU50.2 RecName: Full=Amino-acid permease BAT1; AltName: Full=Bidirectional amino acid transporter 1; AltName: Full=GABA permease; Short=AtGABP && PF13520:Amino acid permease	-
HORVU.MOREX.r2.4HG0281260	2.93574	0.808635	29.0948	2.36395	- && Q4W8D0.1 RecName: Full=Glutamine synthetase cytosolic isozyme 1-3; AltName: Full=Glutamate--ammonia ligase GLN1;3; Short=OsGLN1;3; AltName: Full=OsGS1;3 && PF00120:Glutamine synthetase, catalytic domain|PF03951:Glutamine synthetase, beta-Grasp domain	-
HORVU.MOREX.r2.5HG0351740	0.446717	12.6829	0.0607793	12.7913	- && Q85ZV6.1 RecName: Full=Maturase K; AltName: Full=Intron maturase && PF01824:MatK/TrnK amino terminal region	-
HORVU.MOREX.r2.7HG0556530	0.614755	0.147707	4.30254	0.162868	- && Q9SBQ9.1 RecName: Full=Flavonoid 3'-monooxygenase; AltName: Full=Cytochrome P450 75B2; AltName: Full=Flavonoid 3'-hydroxylase [Petunia x hybrida] && PF00067:Cytochrome P450	p450
HORVU.MOREX.r2.6HG0513330	41.8317	10.9081	137.355	13.8213	- && - && -	-
novel.1172	0.0176579	2.12251	0	1.90983	- && - && -	-
HORVU.MOREX.r2.2HG0151400	3.31716	11.2159	0.925445	6.54988	- && Q9LHJ2.1 RecName: Full=UDP-glycosyltransferase 82A1 && PF00201:UDP-glucoronosyl and UDP-glucosyl transferase	UDPGT
HORVU.MOREX.r2.UnG0634660	0.56026	5.79246	0.206986	3.99905	- && A1E9M9.1 RecName: Full=30S ribosomal protein S3, chloroplastic && PF00189:Ribosomal protein S3, C-terminal domain	-
HORVU.MOREX.r2.1HG0003620	373.694	697.631	136.439	659.721	- && - && -	-
HORVU.MOREX.r2.1HG0074060	205.303	475.211	77.8717	522.82	- && O22386.2 RecName: Full=50S ribosomal protein L12, chloroplastic; AltName: Full=CL12; Flags: Precursor && PF16320:Ribosomal protein L7/L12 dimerisation domain|PF00542:Ribosomal protein L7/L12 C-terminal domain	-
HORVU.MOREX.r2.6HG0520340	0.163774	21.3378	0.100635	16.3738	- && - && -	-
novel.963	0	0.848382	0.0284198	1.32984	- && - && -	-
HORVU.MOREX.r2.3HG0243630	2.38854	5.14898	0.233782	4.19581	- && Q5ZAY9.1 RecName: Full=Cytokinin dehydrogenase 5; AltName: Full=Cytokinin oxidase 5; Short=OsCKX5; Flags: Precursor && PF01565:FAD binding domain|PF09265:Cytokinin dehydrogenase 1, FAD and cytokinin binding	FAD_binding_4
HORVU.MOREX.r2.7HG0547790	6.42591	3.41371	29.1279	8.60848	- && Q9C5V5.2 RecName: Full=Glutamate receptor 2.8; AltName: Full=Ligand-gated ion channel 2.8; Flags: Precursor && PF00060:Ligand-gated ion channel|PF00497:Bacterial extracellular solute-binding proteins, family 3	Lig_chan
HORVU.MOREX.r2.UnG0630690	2.53533	10.9539	1.15197	8.81245	- && Q95H60.1 RecName: Full=NAD(P)H-quinone oxidoreductase subunit J, chloroplastic; AltName: Full=NAD(P)H dehydrogenase subunit J; AltName: Full=NADH-plastoquinone oxidoreductase subunit J >Q7GT16.1 RecName: Full=NAD(P)H-quinone oxidoreductase subunit J,	-
HORVU.MOREX.r2.2HG0130560	0	8.63477	0	6.00359	- && Q9XI05.2 RecName: Full=Proteasome subunit beta type-3-A; AltName: Full=20S proteasome beta subunit C-1; AltName: Full=Proteasome component T && -	-
HORVU.MOREX.r2.7HG0542080	75.2105	147.064	37.9458	121.16	- && Q9FJ45.1 RecName: Full=GDSL esterase/lipase At5g45910; AltName: Full=Extracellular lipase At5g45910; Flags: Precursor && PF00657:GDSL-like Lipase/Acylhydrolase	Lipase_GDSL
HORVU.MOREX.r2.6HG0459750	1.10519	0.205782	11.7	0.762014	- && - && -	-
HORVU.MOREX.r2.4HG0277800	25.664	60	9.42035	61.2579	- && Q9SGU2.1 RecName: Full=Auxin-responsive protein SAUR71; AltName: Full=Protein SMALL AUXIN UP RNA 71 && PF02519:Auxin responsive protein	Auxin_inducible
HORVU.MOREX.r2.2HG0086020	63.8606	113.753	16.8188	150.246	- && P26667.1 RecName: Full=Ribulose bisphosphate carboxylase small chain PW9, chloroplastic; Short=RuBisCO small subunit PW9; Flags: Precursor && PF12338:Ribulose-1,5-bisphosphate carboxylase small subunit|PF00101:Ribulose bisphosphate carboxylase, small	-
novel.312	0.0283678	4.0284	0.0168483	4.67472	- && - && -	-
HORVU.MOREX.r2.3HG0185940	1.49925	4.4581	0.783352	5.21235	- && - && PF03145:Seven in absentia protein family	-
HORVU.MOREX.r2.7HG0587680	6.91721	1.51572	28.246	1.87415	- && - && PF00139:Legume lectin domain	-
HORVU.MOREX.r2.4HG0293270	2.38981	7.04576	1.03933	8.44689	- && P37107.1 RecName: Full=Signal recognition particle 54 kDa protein, chloroplastic; Short=54 chloroplast protein; Short=54CP; Short=SRP54; Short=cpSRP54; AltName: Full=FFC; Flags: Precursor && PF00448:SRP54-type protein, GTPase domain|PF02978:Signal pe	-
HORVU.MOREX.r2.4HG0289360	9.71734	1.81895	43.8654	2.29559	- && - && -	-
HORVU.MOREX.r2.6HG0526450	9.3481	3.38671	32.6886	3.73113	- && Q7XNX6.2 RecName: Full=Sucrose synthase 7; Short=OsSUS7; AltName: Full=Sucrose-UDP glucosyltransferase 7 && PF00534:Glycosyl transferases group 1|PF00862:Sucrose synthase	Glycos_transf_1
HORVU.MOREX.r2.2HG0154440	18.9941	8.46437	81.0364	7.58857	- && - && PF16594:Putative AtpZ or ATP-synthase-associated	-
HORVU.MOREX.r2.7HG0608610	0.600412	26.2698	0.91974	18.3042	- && - && -	-
HORVU.MOREX.r2.6HG0496470	20.6353	9.08112	60.8289	15.4715	- && O22150.1 RecName: Full=Auxin-responsive protein SAUR36; AltName: Full=Protein RESPONSE TO AUXINS AND GIBBERELLINS 1; AltName: Full=Protein SENESCENCE-ASSOCIATED GENE 201; AltName: Full=Protein SMALL AUXIN UP RNA 36 && PF02519:Auxin responsive protein	Auxin_inducible
HORVU.MOREX.r2.7HG0603250	23.3934	4.18586	70.4859	8.295	- && P32295.1 RecName: Full=Indole-3-acetic acid-induced protein ARG7 && PF02519:Auxin responsive protein	Auxin_inducible
HORVU.MOREX.r2.6HG0509890	68.9469	23.6897	183.458	22.2396	- && Q8L736.2 RecName: Full=F-box/kelch-repeat protein SKIP11; AltName: Full=SKP1-interacting partner 11 && PF01344:Kelch motif	Kelch_1
HORVU.MOREX.r2.2HG0086030	50.7649	98.3326	21.853	148.117	- && P00871.2 RecName: Full=Ribulose bisphosphate carboxylase small chain PWS4.3, chloroplastic; Short=RuBisCO small subunit PWS4.3; Flags: Precursor && PF12338:Ribulose-1,5-bisphosphate carboxylase small subunit|PF00101:Ribulose bisphosphate carboxylase,	-
HORVU.MOREX.r2.4HG0297260	2.49444	0.688632	6.76937	0.620878	- && P17801.2 RecName: Full=Putative receptor protein kinase ZmPK1; Flags: Precursor && PF00954:S-locus glycoprotein domain|PF00069:Protein kinase domain|PF00024:PAN domain|PF01453:D-mannose binding lectin	Pkinase
HORVU.MOREX.r2.6HG0489990	122.127	35.4848	346.86	35.8327	- && Q6ZI50.1 RecName: Full=High-affinity nitrate transporter-activating protein 2.1; Short=OsNAR2.1; Flags: Precursor && PF16974:High-affinity nitrate transporter accessory	-
HORVU.MOREX.r2.5HG0417090	13.2579	2.96724	36.9102	3.95193	- && Q0DJ94.2 RecName: Full=Probable calcium-binding protein CML21; AltName: Full=Calmodulin-like protein 21 && PF13499:EF-hand domain pair|PF13405:EF-hand domain	-
HORVU.MOREX.r2.7HG0611210	20.7785	4.06109	43.6465	3.31612	- && Q700D9.2 RecName: Full=Putative Myb family transcription factor At1g14600 && PF00249:Myb-like DNA-binding domain	Myb_DNA-binding
HORVU.MOREX.r2.3HG0183210	41.1247	4.30609	91.9743	13.7806	- && - && -	-
novel.1064	0	6.01213	0.0270202	9.39219	- && - && -	-
HORVU.MOREX.r2.5HG0354290	1.70952	0.417428	9.22304	1.14593	- && O24592.2 RecName: Full=9-cis-epoxycarotenoid dioxygenase 1, chloroplastic; AltName: Full=Protein VIVIPAROUS14; Short=VP-14; Short=VP14; Flags: Precursor && PF03055:Retinal pigment epithelial membrane protein	RPE65
HORVU.MOREX.r2.2HG0128360	1.35039	0.509172	10.0252	0.776177	- && P42815.1 RecName: Full=Ribonuclease 3; Flags: Precursor && PF00445:Ribonuclease T2 family	Ribonuclease_T2
HORVU.MOREX.r2.6HG0460850	15.7107	4.50973	56.7794	5.68138	- && O81970.1 RecName: Full=Cytochrome P450 71A9; AltName: Full=Cytochrome P450 CP1 && PF00067:Cytochrome P450	p450
novel.627	0	2.17143	0	2.22637	- && - && -	-
HORVU.MOREX.r2.4HG0324960	2.20361	13.5327	2.20442	15.9358	- && P0CH35.1 RecName: Full=Ubiquitin-60S ribosomal protein L40-2; Contains: RecName: Full=Ubiquitin; Contains: RecName: Full=60S ribosomal protein L40-2; AltName: Full=CEP52; Flags: Precursor >P0CH34.1 RecName: Full=Ubiquitin-60S ribosomal protein L40-1;	ubiquitin
HORVU.MOREX.r2.2HG0087670	1.81876	5.31759	0.726645	4.07925	- && Q0JF01.1 RecName: Full=9-beta-pimara-7,15-diene oxidase; AltName: Full=Cytochrome P450 99A3 && PF00067:Cytochrome P450	p450
HORVU.MOREX.r2.7HG0607230	7.41002	3.44732	24.1774	3.06508	- && Q7XA06.1 RecName: Full=Synaptotagmin-3; AltName: Full=NTMC2T1.3; AltName: Full=Synaptotagmin C && PF00168:C2 domain|PF17047:Synaptotagmin-like mitochondrial-lipid-binding domain	C2
HORVU.MOREX.r2.5HG0356780	244.481	314.593	43.3822	164.464	- && Q7G8Y5.1 RecName: Full=Glutaredoxin-C1 && PF00462:Glutaredoxin	-
HORVU.MOREX.r2.4HG0323020	4.12222	8.11587	1.8117	9.9028	- && Q65XV2.1 RecName: Full=E3 ubiquitin-protein ligase XB3; AltName: Full=Ankyrin repeat domain and RING finger-containing protein XB3; AltName: Full=XA21-binding protein 3 && PF13857:Ankyrin repeats (many copies)|PF13637:Ankyrin repeats (many copies)	-
HORVU.MOREX.r2.6HG0522340	46.3901	105.086	15.9926	78.9094	- && Q9FG13.1 RecName: Full=Probable carboxylesterase 15; AltName: Full=AtCXE15 && PF07859:alpha/beta hydrolase fold	Abhydrolase_3
HORVU.MOREX.r2.6HG0455790	0	10.3081	0	9.50258	- && P68427.2 RecName: Full=Histone H3.2 >P68428.2 RecName: Full=Histone H3.2 >P68429.2 RecName: Full=Histone H3.2; AltName: Full=Histone H3.1; AltName: Full=Major histone H3 >P68430.2 RecName: Full=Histone H3.2 && PF00125:Core histone H2A/H2B/H3/H4	Histone
HORVU.MOREX.r2.2HG0083680	0.92183	2.70621	0.48981	2.55951	- && A5U866.1 RecName: Full=Cyclopropane mycolic acid synthase 1; Short=CMAS; AltName: Full=Cyclopropane-fatty-acyl-phospholipid synthase; Short=CFA synthase; Short=Cyclopropane fatty acid synthase; AltName: Full=Mycolic acid methyltransferase; Short=MA-M	Amino_oxidase
HORVU.MOREX.r2.6HG0496810	0.511946	0.218424	2.564	0.145018	- && Q9C882.2 RecName: Full=Trihelix transcription factor GTL1; AltName: Full=GT2-LIKE protein 1; Short=AtGTL1; Short=Protein GT-2-LIKE1; AltName: Full=Trihelix DNA-binding protein GTL1 && PF13837:Myb/SANT-like DNA-binding domain	-
HORVU.MOREX.r2.5HG0424220	1.56746	0.266248	6.80594	0.627932	- && Q23892.2 RecName: Full=Lysosomal beta glucosidase; Flags: Precursor && PF00933:Glycosyl hydrolase family 3 N terminal domain|PF01915:Glycosyl hydrolase family 3 C-terminal domain	Glyco_hydro_3
HORVU.MOREX.r2.2HG0114410	0.86527	6.97109	0.55162	6.91795	- && P58420.1 RecName: Full=NAD(P)H-quinone oxidoreductase chain 4, chloroplastic; AltName: Full=NAD(P)H dehydrogenase, chain 4; AltName: Full=NADH-plastoquinone oxidoreductase chain 4 && -	-
HORVU.MOREX.r2.5HG0414090	45.0175	5.94948	138.652	8.54132	- && Q9FMK9.1 RecName: Full=Probable inactive purple acid phosphatase 29; Flags: Precursor && PF00149:Calcineurin-like phosphoesterase	Metallophos
HORVU.MOREX.r2.3HG0271760	1.86232	0.217932	6.6806	0.361842	- && - && -	-
HORVU.MOREX.r2.2HG0107840	4.84425	1.18297	25.9512	1.68393	- && Q0D541.1 RecName: Full=Probable serine/threonine-protein kinase WNK5; Short=OsWNK5; AltName: Full=Protein kinase with no lysine 5 && PF00069:Protein kinase domain	Pkinase
HORVU.MOREX.r2.3HG0226950	2.36051	5.26443	0.970557	6.17108	- && Q9SHJ5.1 RecName: Full=Glycerol-3-phosphate acyltransferase 1; Short=AtGPAT1 && PF01553:Acyltransferase	Acyltransferase
HORVU.MOREX.r2.UnG0633190	0.698379	8.39004	0.140078	7.05255	- && A1E9M6.1 RecName: Full=30S ribosomal protein S8, chloroplastic && PF00410:Ribosomal protein S8	-
HORVU.MOREX.r2.5HG0435440	0.964487	5.2501	0.798985	6.24702	- && O80939.1 RecName: Full=L-type lectin-domain containing receptor kinase IV.1; Short=Arabidopsis thaliana lectin-receptor kinase e; Short=AthlecRK-e; Short=LecRK-IV.1; AltName: Full=Lectin Receptor Kinase 1; Flags: Precursor && PF07714:Protein tyrosine	Pkinase_Tyr
HORVU.MOREX.r2.2HG0168920	114.53	20.2544	517.579	31.8371	- && - && -	-
HORVU.MOREX.r2.2HG0127220	0	3.78164	0	3.40506	- && Q9M077.1 RecName: Full=Serine/threonine-protein kinase Aurora-1; Short=AtAur1; AltName: Full=Aurora-like kinase 1 && PF00069:Protein kinase domain	Pkinase
HORVU.MOREX.r2.UnG0632780	0.181071	7.78819	0.0871422	6.20856	- && P12339.2 RecName: Full=30S ribosomal protein S7, chloroplastic >Q6ENQ9.1 RecName: Full=30S ribosomal protein S7, chloroplastic >Q6L3C6.1 RecName: Full=30S ribosomal protein S7, chloroplastic >A1EA53.1 RecName: Full=30S ribosomal protein S7, chloropla	-
HORVU.MOREX.r2.6HG0511920	8.38461	2.6803	26.1882	2.52979	- && Q9M1S3.1 RecName: Full=Probable RNA-binding protein ARP1; AltName: Full=ABA-regulated RNA-binding protein 1 && PF00076:RNA recognition motif. (a.k.a. RRM, RBD, or RNP domain)	RRM_1
HORVU.MOREX.r2.2HG0114420	1.33808	7.50617	0.63707	8.14157	- && A1EA59.1 RecName: Full=NAD(P)H-quinone oxidoreductase chain 4, chloroplastic; AltName: Full=NAD(P)H dehydrogenase, chain 4; AltName: Full=NADH-plastoquinone oxidoreductase chain 4 && PF00361:Proton-conducting membrane transporter	-
HORVU.MOREX.r2.2HG0176340	5.73488	8.33979	1.48002	7.54118	- && O64477.1 RecName: Full=G-type lectin S-receptor-like serine/threonine-protein kinase At2g19130; Flags: Precursor && PF01453:D-mannose binding lectin|PF00954:S-locus glycoprotein domain|PF00069:Protein kinase domain|PF08276:PAN-like domain	Pkinase
HORVU.MOREX.r2.7HG0563500	0.66406	2.77483	0.0791041	3.80266	- && Q9SJ81.1 RecName: Full=Fasciclin-like arabinogalactan protein 7; Flags: Precursor && PF02469:Fasciclin domain	-
HORVU.MOREX.r2.7HG0606710	3.04793	9.61547	1.48563	13.7567	- && - && -	-
HORVU.MOREX.r2.2HG0150280	26.4911	12.1373	68.4799	5.30739	- && Q8RXU4.1 RecName: Full=Probable low-specificity L-threonine aldolase 1; AltName: Full=Threonine aldolase 1 && PF01212:Beta-eliminating lyase	Beta_elim_lyase
HORVU.MOREX.r2.UnG0626130	55.372	113.217	25.5762	123.574	- && - && -	-
HORVU.MOREX.r2.6HG0516720	24.2799	1.97573	130.994	9.02695	- && P12948.1 RecName: Full=Dehydrin DHN3; AltName: Full=B17 && PF00257:Dehydrin	-
HORVU.MOREX.r2.1HG0048510	1.17961	0.784389	8.79505	0.672398	- && Q9LRB7.1 RecName: Full=E3 ubiquitin-protein ligase EL5; AltName: Full=Protein ELICITOR 5 && PF13639:Ring finger domain	-
novel.360	0.020706	3.46667	0	3.74194	- && - && -	-
HORVU.MOREX.r2.4HG0288990	6.68201	0.282815	66.7118	3.16578	- && - && -	-
HORVU.MOREX.r2.7HG0531260	21.8211	37.5628	10.6836	31.8866	- && - && -	-
HORVU.MOREX.r2.3HG0206270	208.86	109.304	510.481	111.402	- && Q5N800.1 RecName: Full=Probable chlorophyll(ide) b reductase NYC1, chloroplastic; AltName: Full=Protein NON-YELLOW COLORING 1; Short=OsNYC1; Flags: Precursor && PF00106:short chain dehydrogenase	adh_short
HORVU.MOREX.r2.7HG0541090	0	4.38853	0	2.244	- && - && -	-
HORVU.MOREX.r2.4HG0347210	20.9743	7.08587	59.8548	7.25367	- && Q20390.2 RecName: Full=Palmitoyl-protein thioesterase 1; Short=PPT-1; AltName: Full=Palmitoyl-protein hydrolase 1; Flags: Precursor && PF02089:Palmitoyl protein thioesterase	-
novel.159	0.0174956	1.03024	0.0397585	1.96278	- && - && -	-
HORVU.MOREX.r2.7HG0589200	0.94261	0.400542	15.6567	0.891799	- && O82337.1 RecName: Full=Arabinogalactan peptide 16; Short=AG-peptide 16; Flags: Precursor && PF06376:Protein of unknown function (DUF1070)	-
HORVU.MOREX.r2.3HG0249410	3.96809	7.51556	1.59481	9.03301	- && - && PF04043:Plant invertase/pectin methylesterase inhibitor	-
HORVU.MOREX.r2.5HG0424130	7.02261	13.5548	3.09655	10.6837	- && Q23892.2 RecName: Full=Lysosomal beta glucosidase; Flags: Precursor && PF00933:Glycosyl hydrolase family 3 N terminal domain|PF01915:Glycosyl hydrolase family 3 C-terminal domain	Glyco_hydro_3
HORVU.MOREX.r2.1HG0054450	0.286967	0.14449	1.56725	0.17605	- && C0LGP4.1 RecName: Full=Probable LRR receptor-like serine/threonine-protein kinase At3g47570; Flags: Precursor && PF08263:Leucine rich repeat N-terminal domain|PF00069:Protein kinase domain	Pkinase
novel.1238	0.00580347	1.3537	0.00323764	0.935504	- && - && -	-
HORVU.MOREX.r2.1HG0070660	0.381502	0.0952733	2.27215	0.177044	- && Q766C3.1 RecName: Full=Aspartic proteinase nepenthesin-1; AltName: Full=Nepenthesin-I; Flags: Precursor && PF14541:Xylanase inhibitor C-terminal|PF14543:Xylanase inhibitor N-terminal	-
HORVU.MOREX.r2.4HG0347720	7.65924	1.62575	21.9031	2.86159	- && O03982.1 RecName: Full=Heavy metal-associated isoprenylated plant protein 39; Short=AtHIP39; Flags: Precursor && PF00403:Heavy-metal-associated domain	HMA
HORVU.MOREX.r2.2HG0179580	342.35	89.5426	711.859	97.9595	- && - && -	-
HORVU.MOREX.r2.6HG0477640	23.0486	4.43666	22.6062	3.14135	- && Q9LSC2.1 RecName: Full=PTI1-like tyrosine-protein kinase At3g15890 && PF07714:Protein tyrosine kinase	Pkinase_Tyr
HORVU.MOREX.r2.2HG0128930	0.405349	10.152	1.07889	14.3622	- && - && -	-
HORVU.MOREX.r2.UnG0633150	0.453108	5.74864	0.326394	5.62713	- && A1E9J3.1 RecName: Full=30S ribosomal protein S4, chloroplastic && PF01479:S4 domain|PF00163:Ribosomal protein S4/S9 N-terminal domain	S4
HORVU.MOREX.r2.4HG0320060	14.6192	3.06704	63.7541	3.59661	- && Q10MX3.1 RecName: Full=Asparagine synthetase [glutamine-hydrolyzing] 1; AltName: Full=Glutamine-dependent asparagine synthetase 1 && PF00733:Asparagine synthase|PF13537:Glutamine amidotransferase domain	-
HORVU.MOREX.r2.5HG0382610	6.7224	2.23952	23.0455	2.92284	- && Q9FYE1.1 RecName: Full=Metacaspase-9; Short=AtMC9; Contains: RecName: Full=Metacaspase-9 subunit p20; Contains: RecName: Full=Metacaspase-9 subunit p10; AltName: Full=Metacaspase 2f; Short=AtMCP2f && PF00656:Caspase domain	Peptidase_C14
novel.704	0.0168139	2.828	0.0154975	3.64794	- && - && -	-
HORVU.MOREX.r2.3HG0196550	9.24267	19.898	4.07872	16.775	- && P0C127.1 RecName: Full=Auxin-responsive protein IAA16; AltName: Full=Indoleacetic acid-induced protein 16 && PF02309:AUX/IAA family	-
HORVU.MOREX.r2.7HG0578120	0.127999	2.9472	0.102452	4.15817	- && - && PF05699:hAT family C-terminal dimerisation region	hATC
HORVU.MOREX.r2.3HG0269080	6.16541	1.32526	12.2642	1.53068	- && Q9M0X5.1 RecName: Full=Cysteine-rich receptor-like protein kinase 25; Short=Cysteine-rich RLK25; Flags: Precursor && PF07714:Protein tyrosine kinase|PF01657:Salt stress response/antifungal	Pkinase_Tyr
HORVU.MOREX.r2.5HG0360570	23.3837	44.7233	14.3254	47.4982	- && - && PF13450:NAD(P)-binding Rossmann-like domain	-
HORVU.MOREX.r2.1HG0006780	0.279773	6.17601	0	4.22263	- && - && PF03108:MuDR family transposase	MuDR
HORVU.MOREX.r2.4HG0294410	3.77278	6.68151	1.43014	7.12333	- && O04682.1 RecName: Full=Pathogenesis-related genes transcriptional activator PTI6; AltName: Full=PTO-interacting protein 6 && PF00847:AP2 domain	AP2
HORVU.MOREX.r2.1HG0077150	0.834521	4.49712	0.350881	10.1467	- && P80022.2 RecName: Full=Extracellular ribonuclease LE; Short=RNase LE; Flags: Precursor && PF00445:Ribonuclease T2 family	Ribonuclease_T2
HORVU.MOREX.r2.6HG0516930	6.0087	1.22058	14.5112	1.62428	- && Q94AZ2.2 RecName: Full=Sugar transport protein 13; AltName: Full=Hexose transporter 13; AltName: Full=Multicopy suppressor of snf4 deficiency protein 1 && PF00083:Sugar (and other) transporter	Sugar_tr
HORVU.MOREX.r2.7HG0547720	13.8692	2.77898	24.9938	3.52603	- && Q9C5V5.2 RecName: Full=Glutamate receptor 2.8; AltName: Full=Ligand-gated ion channel 2.8; Flags: Precursor && PF00060:Ligand-gated ion channel	Lig_chan
HORVU.MOREX.r2.UnG0632370	0.853209	5.633	0.313983	6.96136	- && Q6ENF3.1 RecName: Full=Photosystem I reaction center subunit IX; AltName: Full=PSI-J >P0C374.1 RecName: Full=Photosystem I reaction center subunit IX; AltName: Full=PSI-J >P12192.2 RecName: Full=Photosystem I reaction center subunit IX; AltName: Full	-
novel.229	0	1.3711	0	1.27541	- && Q9ZV71.1 RecName: Full=Probable beta-1,3-galactosyltransferase 3 && PF01762:Galactosyltransferase	Galactosyl_T
HORVU.MOREX.r2.7HG0533490	3.89701	2.33792	9.09131	1.44873	- && O82485.1 RecName: Full=Oligopeptide transporter 7; Short=AtOPT7 && PF03169:OPT oligopeptide transporter protein	OPT
HORVU.MOREX.r2.5HG0397860	8.8296	2.28376	16.9262	3.20752	- && Q8GXZ3.1 RecName: Full=Serine/threonine-protein kinase At5g01020 && PF07714:Protein tyrosine kinase	Pkinase_Tyr
novel.344	0.173569	6.93555	0.123392	6.09192	- && - && -	-
HORVU.MOREX.r2.4HG0275900	11.6991	27.4303	5.48347	26.4249	- && - && -	-
HORVU.MOREX.r2.5HG0445070	0.960313	8.29961	0.743331	7.15794	- && - && PF12274:Protein of unknown function (DUF3615)	-
HORVU.MOREX.r2.1HG0004200	61.4668	111.423	41.6539	131.686	- && Q41050.1 RecName: Full=Outer envelope pore protein 16, chloroplastic; AltName: Full=Chloroplastic outer envelope pore protein of 16 kDa [Pisum sativum] && PF02466:Tim17/Tim22/Tim23/Pmp24 family	-
HORVU.MOREX.r2.3HG0234390	6.13339	2.32722	18.5741	2.4069	- && Q9FWX7.1 RecName: Full=ABC transporter B family member 11; Short=ABC transporter ABCB.11; Short=AtABCB11; AltName: Full=Multidrug resistance protein 8; AltName: Full=P-glycoprotein 11 && PF07673:Protein of unknown function (DUF1602)|PF00005:ABC trans	ABC_membrane
HORVU.MOREX.r2.5HG0427610	2.57104	0.327171	3.93287	0.722715	- && Q9FKL6.1 RecName: Full=Calmodulin-binding protein 60 B && PF07887:Calmodulin binding protein-like	-
novel.729	5.23271	7.07365	1.39502	8.06468	- && - && -	-
HORVU.MOREX.r2.5HG0427370	4.25243	1.0997	9.38146	1.3918	- && Q9SK55.1 RecName: Full=Transcription factor JUNGBRUNNEN 1; AltName: Full=NAC domain-containing protein 42; Short=ANAC042 && PF02365:No apical meristem (NAM) protein	NAM
HORVU.MOREX.r2.2HG0091730	26.8835	4.42771	71.1296	11.6376	- && P27061.1 RecName: Full=Acid phosphatase 1; AltName: Full=Apase-1(1); Flags: Precursor && PF03767:HAD superfamily, subfamily IIIB (Acid phosphatase)	-
HORVU.MOREX.r2.2HG0162790	3.08435	0.546368	6.06195	0.850533	- && Q9FG33.1 RecName: Full=Probable L-type lectin-domain containing receptor kinase S.5; Short=LecRK-S.5; Flags: Precursor && PF00139:Legume lectin domain|PF00069:Protein kinase domain	Pkinase
novel.1512	2.31932	0.172398	7.27602	0.224068	- && - && -	-
HORVU.MOREX.r2.5HG0439330	1.46257	0.720411	7.64447	0.636027	- && Q10B67.2 RecName: Full=Mannan endo-1,4-beta-mannosidase 4; AltName: Full=Beta-mannanase 4; AltName: Full=Endo-beta-1,4-mannanase 4; AltName: Full=OsMAN4 && PF00150:Cellulase (glycosyl hydrolase family 5)	-
HORVU.MOREX.r2.4HG0298030	0.0082091	2.44422	0.00975112	2.06386	- && Q0IQU1.2 RecName: Full=Laccase-22; AltName: Full=Benzenediol:oxygen oxidoreductase 22; AltName: Full=Diphenol oxidase 22; AltName: Full=Urishiol oxidase 22; Flags: Precursor && PF07732:Multicopper oxidase|PF00394:Multicopper oxidase|PF07731:Multicopp	-
HORVU.MOREX.r2.3HG0272070	4.09868	2.15332	21.2855	2.17933	- && - && -	-
HORVU.MOREX.r2.5HG0396910	76.7656	149.268	36.2233	180.338	- && Q6ERW7.2 RecName: Full=Probable cinnamyl alcohol dehydrogenase 8C; Short=OsCAD8C && PF00107:Zinc-binding dehydrogenase|PF08240:Alcohol dehydrogenase GroES-like domain	ADH_N
HORVU.MOREX.r2.2HG0169030	93.7428	6.81321	241.587	14.9139	- && - && -	-
HORVU.MOREX.r2.2HG0168890	71.6833	9.52282	166.504	13.2732	- && - && -	-
HORVU.MOREX.r2.UnG0633520	0.934228	5.06968	0.568677	5.29741	- && A1E9J0.1 RecName: Full=Photosystem I P700 chlorophyll a apoprotein A2; AltName: Full=PSI-B; AltName: Full=PsaB && PF00223:Photosystem I psaA/psaB protein	-
novel.498	0.0282814	1.50616	0.10638	1.68394	- && P0CD17.1 RecName: Full=NAD(P)H-quinone oxidoreductase subunit 2 B, chloroplastic; AltName: Full=NAD(P)H dehydrogenase, subunit 2 B; AltName: Full=NADH-plastoquinone oxidoreductase subunit 2 B >P0CD16.1 RecName: Full=NAD(P)H-quinone oxidoreductase sub	-
HORVU.MOREX.r2.1HG0006510	67.7695	14.4795	316.637	24.7327	- && Q0IP28.1 RecName: Full=Laccase-25; AltName: Full=Benzenediol:oxygen oxidoreductase 25; AltName: Full=Diphenol oxidase 25; AltName: Full=Urishiol oxidase 25; Flags: Precursor && PF07732:Multicopper oxidase|PF00394:Multicopper oxidase|PF07731:Multicopp	-
HORVU.MOREX.r2.3HG0246240	12.5815	3.80975	22.21	2.95611	- && Q9LDH1.1 RecName: Full=Sigma factor binding protein 1, chloroplastic; Short=AtsibI; Short=Sigma factor binding protein I; AltName: Full=SigA binding protein; AltName: Full=VQ motif-containing protein 23; Short=AtVQ23; Flags: Precursor && PF05678:VQ m	-
HORVU.MOREX.r2.6HG0493460	0.128837	8.06612	0	6.71297	- && - && -	-
HORVU.MOREX.r2.UnG0634460	18.5468	50.7773	6.65381	41.5227	- && P26303.1 RecName: Full=NAD(P)H-quinone oxidoreductase subunit 3, chloroplastic; AltName: Full=NAD(P)H dehydrogenase subunit 3; AltName: Full=NADH-plastoquinone oxidoreductase subunit 3 >A1E9J6.1 RecName: Full=NAD(P)H-quinone oxidoreductase subunit 3,	-
HORVU.MOREX.r2.5HG0367660	22.3484	14.8142	101.231	28.6277	- && - && -	-
HORVU.MOREX.r2.2HG0097130	5.3862	11.2818	5.92635	16.7574	- && B1B1U3.1 RecName: Full=Alpha-humulene synthase && PF03936:Terpene synthase family, metal binding domain|PF01397:Terpene synthase, N-terminal domain	-
HORVU.MOREX.r2.3HG0266360	0.663169	4.40782	0.870239	3.69799	- && Q10Q26.1 RecName: Full=B3 domain-containing protein Os03g0212300 && PF02362:B3 DNA binding domain	B3
novel.250	0	0.413819	0	1.41014	- && - && -	-
HORVU.MOREX.r2.7HG0590150	0.845398	0.0238991	5.94409	0.159056	- && Q9LJ97.1 RecName: Full=Late embryogenesis abundant protein 31; Short=LEA 31; AltName: Full=Protein RESPONSIVE TO ABSCISIC ACID 28; Short=AtRAB28 && PF04927:Seed maturation protein	-
HORVU.MOREX.r2.4HG0331160	125.347	70.6366	292.604	64.5529	- && Q10Q65.1 RecName: Full=Metal transporter Nramp2; Short=OsNramp2 && PF01566:Natural resistance-associated macrophage protein	-
HORVU.MOREX.r2.1HG0003030	18.2557	64.4599	9.31335	57.216	- && A1EA04.1 RecName: Full=ATP synthase subunit b, chloroplastic; AltName: Full=ATP synthase F(0) sector subunit b; AltName: Full=ATPase subunit I && PF00430:ATP synthase B/B' CF(0)	-
HORVU.MOREX.r2.4HG0281690	4.32873	6.05509	2.34949	9.48848	- && P43298.1 RecName: Full=Receptor protein kinase TMK1; AltName: Full=BARK1-like kinase 1; AltName: Full=Transmembrane kinase 1; Flags: Precursor && PF07714:Protein tyrosine kinase	Pkinase_Tyr
HORVU.MOREX.r2.6HG0520330	0	2.72221	0	1.71712	- && - && -	-
novel.692	0	2.18008	0	2.05212	- && - && -	-
HORVU.MOREX.r2.7HG0588570	1.4884	19.0448	0.69978	8.97553	- && - && -	-
HORVU.MOREX.r2.3HG0226850	1.82115	0.634337	8.41278	0.653045	- && Q9LUC5.1 RecName: Full=Cytochrome P450 72A15 && PF00067:Cytochrome P450	p450
HORVU.MOREX.r2.1HG0062250	19.445	15.4284	3.7279	15.2896	- && Q6F303.1 RecName: Full=Pseudo histidine-containing phosphotransfer protein 5; AltName: Full=OsHpt5 && -	-
HORVU.MOREX.r2.4HG0280990	8.27102	6.84323	75.8344	7.22427	- && P60496.1 RecName: Full=Chemocyanin; AltName: Full=Basic blue protein; AltName: Full=Plantacyanin; Flags: Precursor && PF02298:Plastocyanin-like domain	Cu_bind_like
HORVU.MOREX.r2.5HG0352380	0.0344417	1.0955	0	1.57443	- && - && PF12776:Myb/SANT-like DNA-binding domain	-
novel.1206	13.0639	3.71943	18.1121	3.98655	- && - && -	-
novel.600	1.06401	8.22149	0.526979	8.16687	- && - && -	-
HORVU.MOREX.r2.7HG0623140	0.566044	0.270002	1.49865	0.235587	- && Q6ET36.1 RecName: Full=Ent-copalyl diphosphate synthase 1, chloroplastic; Short=Ent-CDP synthase 1; Short=OsCPS1; Short=OsCPS1ent; AltName: Full=Ent-kaurene synthase A; AltName: Full=OsCPS; Flags: Precursor && PF01397:Terpene synthase, N-terminal dom	-
HORVU.MOREX.r2.3HG0265830	61.1018	74.8418	5.98935	40.9188	- && Q02126.1 RecName: Full=Glucan endo-1,3-beta-glucosidase GIII; AltName: Full=(1->3)-beta-glucan endohydrolase GIII; AltName: Full=(1->3)-beta-glucanase isoenzyme GIII; AltName: Full=Beta-1,3-endoglucanase GIII; Flags: Precursor && PF00332:Glycosyl hyd	Glyco_hydro_17
HORVU.MOREX.r2.7HG0588540	26.9931	7.55951	46.2521	5.32127	- && O04266.1 RecName: Full=GTP-binding protein SAR1A && PF00025:ADP-ribosylation factor family	Arf
HORVU.MOREX.r2.5HG0396930	34.3234	18.0781	101.441	17.2598	- && - && -	-
HORVU.MOREX.r2.4HG0345910	29.5006	7.82953	70.2685	12.7317	- && Q00531.1 RecName: Full=60 kDa jasmonate-induced protein; AltName: Full=rRNA N-glycosidase && -	-
HORVU.MOREX.r2.7HG0544910	16.4935	6.25464	52.5901	6.28736	- && Q8W4L0.1 RecName: Full=Probable calcium-binding protein CML49; AltName: Full=Calmodulin-like protein 49 && PF13405:EF-hand domain	-
HORVU.MOREX.r2.1HG0044670	2.77131	9.25026	1.89306	10.0961	- && Q8GZ38.1 RecName: Full=Transcription factor UNE10; AltName: Full=Basic helix-loop-helix protein 16; Short=AtbHLH16; Short=bHLH 16; AltName: Full=Protein UNFERTILIZED EMBRYO SAC 10; AltName: Full=Transcription factor EN 108; AltName: Full=bHLH transcr	HLH
HORVU.MOREX.r2.3HG0224260	5.33507	2.25459	40.9257	7.47474	- && - && -	-
HORVU.MOREX.r2.5HG0399460	12.5985	32.883	10.2415	39.9958	- && P14897.1 RecName: Full=Low molecular mass early light-inducible protein HV90, chloroplastic; Short=ELIP; Flags: Precursor && -	-
HORVU.MOREX.r2.1HG0073890	84.6523	33.5103	149.87	17.1448	- && Q96562.1 RecName: Full=Chalcone synthase 2; AltName: Full=Naringenin-chalcone synthase 2 && PF00195:Chalcone and stilbene synthases, N-terminal domain|PF02797:Chalcone and stilbene synthases, C-terminal domain	Chal_sti_synt_N
HORVU.MOREX.r2.4HG0318270	0.438675	0.224127	6.83258	0.262916	- && Q0WMZ5.1 RecName: Full=Outer envelope pore protein 16-2, chloroplastic; AltName: Full=Chloroplastic outer envelope pore protein of 16 kDa 2; Short=AtOEP16-2; Short=OEP16-2; AltName: Full=Outer plastid envelope protein 16-S; Short=AtOEP16-S; Short=See	-
novel.372	0	1.39142	0.0152131	1.88931	- && - && -	-
HORVU.MOREX.r2.2HG0127660	0.245587	8.58702	0.103028	7.00009	- && Q7H6J0.1 RecName: Full=DNA-directed RNA polymerase subunit alpha; Short=PEP; AltName: Full=Plastid-encoded RNA polymerase subunit alpha; Short=RNA polymerase subunit alpha >Q7H6J1.1 RecName: Full=DNA-directed RNA polymerase subunit alpha; Short=PEP;	RNA_pol_L
HORVU.MOREX.r2.4HG0301370	48.2993	23.2801	127.19	20.9511	- && Q9ST03.2 RecName: Full=Nicotianamine aminotransferase B && PF00155:Aminotransferase class I and II	Aminotran_1_2
HORVU.MOREX.r2.UnG0634640	1.13314	6.58784	0.44012	6.90797	- && - && -	-
HORVU.MOREX.r2.2HG0140950	15.8777	34.1993	4.34393	39.7685	- && Q9SRQ1.1 RecName: Full=Cytochrome P450 89A9 && PF00067:Cytochrome P450	p450
HORVU.MOREX.r2.5HG0421480	1.96321	0.844725	6.47656	0.61137	- && Q7XZZ3.1 RecName: Full=Probable E3 ubiquitin-protein ligase BAH1-like 1; AltName: Full=RING-type E3 ubiquitin transferase BAH1-like 1 >A2XK56.1 RecName: Full=Probable E3 ubiquitin-protein ligase BAH1-like 1; AltName: Full=RING-type E3 ubiquitin trans	-
HORVU.MOREX.r2.2HG0158730	0.573716	0.0264477	2.32182	0.0592048	- && - && PF03140:Plant protein of unknown function	-
HORVU.MOREX.r2.3HG0253580	1.35123	0.643292	6.99844	0.479242	- && Q8S233.1 RecName: Full=Ammonium transporter 2 member 3; Short=OsAMT2;3 && PF00909:Ammonium Transporter Family	Ammonium_transp
HORVU.MOREX.r2.7HG0552530	15.2062	3.97463	50.4722	5.1823	- && Q5NTH3.1 RecName: Full=Shikimate kinase 2, chloroplastic; Short=OsSK2; Flags: Precursor && PF01202:Shikimate kinase	SKI
HORVU.MOREX.r2.6HG0509520	41.8293	100.186	9.14732	117.722	- && Q9SCY3.1 RecName: Full=Photosynthetic NDH subunit of lumenal location 4, chloroplastic; AltName: Full=FK506-binding protein 16-2; Short=AtFKBP16-2; AltName: Full=Immunophilin FKBP16-2; AltName: Full=Peptidyl-prolyl cis-trans isomerase FKBP16-2; Short	FKBP_C
HORVU.MOREX.r2.1HG0005850	2.08444	3.5119	0.481801	3.12172	- && Q5BPJ0.1 RecName: Full=Protein trichome birefringence-like 11 && PF14416:PMR5 N terminal Domain|PF13839:GDSL/SGNH-like Acyl-Esterase family found in Pmr5 and Cas1p	-
HORVU.MOREX.r2.5HG0417580	0.96957	0.0561666	26.321	0.0679374	- && B7E7M8.1 RecName: Full=Probable cytokinin riboside 5'-monophosphate phosphoribohydrolase LOGL9; AltName: Full=Protein LONELY GUY-like 9 && PF03641:Possible lysine decarboxylase	-
HORVU.MOREX.r2.3HG0206050	26.7119	3.27099	126.788	8.08255	- && P46518.1 RecName: Full=Late embryogenesis abundant protein Lea14-A && PF03168:Late embryogenesis abundant protein	-
HORVU.MOREX.r2.7HG0591450	306.439	205.603	541.425	184.748	- && Q9FFZ1.1 RecName: Full=Pheophytinase, chloroplastic; AltName: Full=Pheophytin pheophorbide hydrolase; AltName: Full=Protein CO-REGULATED WITH NYE1; Flags: Precursor && PF12697:Alpha/beta hydrolase family	-
HORVU.MOREX.r2.3HG0221300	44.3184	14.951	126.081	20.538	- && - && -	-
HORVU.MOREX.r2.3HG0263430	28.6597	11.4483	42.5949	13.1043	- && O81906.1 RecName: Full=G-type lectin S-receptor-like serine/threonine-protein kinase B120; Flags: Precursor && PF07714:Protein tyrosine kinase	Pkinase_Tyr
HORVU.MOREX.r2.7HG0532740	9.2541	18.4185	4.65357	18.4703	- && - && -	-
HORVU.MOREX.r2.1HG0073980	805.997	200.534	1409.68	222.053	- && Q7XXD4.2 RecName: Full=Probable inactive methyltransferase Os04g0175900 && PF00891:O-methyltransferase|PF08100:Dimerisation domain	-
HORVU.MOREX.r2.1HG0061390	0.857796	0.185211	5.37125	0.527107	- && Q70II3.2 RecName: Full=Ethylene-responsive transcription factor ERF110 && PF00847:AP2 domain	AP2
HORVU.MOREX.r2.1HG0009540	10.1788	22.4777	7.29589	31.9353	- && - && PF02782:FGGY family of carbohydrate kinases, C-terminal domain|PF00370:FGGY family of carbohydrate kinases, N-terminal domain	FGGY_N
HORVU.MOREX.r2.7HG0531330	8.01762	2.26375	18.2271	5.28272	- && Q9C9H7.2 RecName: Full=Receptor-like protein 12; Short=AtRLP12; Flags: Precursor && PF08263:Leucine rich repeat N-terminal domain|PF13855:Leucine rich repeat	LRRNT_2
HORVU.MOREX.r2.UnG0631700	2.5725	14.5116	1.46587	14.6229	- && - && PF14111:Domain of unknown function (DUF4283)	-
HORVU.MOREX.r2.2HG0146360	60.4835	12.2194	137.135	1.50117	- && Q7XUG1.1 RecName: Full=Malate synthase && PF01274:Malate synthase	-
HORVU.MOREX.r2.2HG0154140	313.291	76.9842	705.198	109.914	- && Q9FLV0.1 RecName: Full=Protein DOWNY MILDEW RESISTANCE 6; Short=AtDMR6; AltName: Full=2-oxoglutarate (2OG)-Fe(II) oxygenase-like protein DMR6; AltName: Full=Salicylate 3-hydroxylase DMR6; Short=S3H DMR6; Short=SA 3-hydroxylase DMR6; Short=Salicylic a	2OG-FeII_Oxy
HORVU.MOREX.r2.4HG0338680	5.86092	21.8108	2.62412	25.5144	- && Q0WUA3.2 RecName: Full=2-carboxy-1,4-naphthoquinone phytyltransferase, chloroplastic; AltName: Full=1,4-dihydroxy-2-naphthoate phytyltransferase; AltName: Full=1,4-dihydroxy-2-naphthoate polyprenyltransferase; AltName: Full=Protein ABERRANT CHLOROPLA	UbiA
HORVU.MOREX.r2.7HG0553370	15.148	27.5743	7.92309	31.4369	- && Q8LE52.1 RecName: Full=Glutathione S-transferase DHAR3, chloroplastic; AltName: Full=Chloride intracellular channel homolog 3; Short=CLIC homolog 3; AltName: Full=Glutathione-dependent dehydroascorbate reductase 3; Short=AtDHAR3; Short=ChlDHAR; Short	-
HORVU.MOREX.r2.5HG0434080	7.32084	14.3836	0.519103	7.21665	- && P04784.1 RecName: Full=Chlorophyll a-b binding protein, chloroplastic; AltName: Full=LHCII type I CAB; Short=LHCP; Flags: Precursor && PF00504:Chlorophyll A-B binding protein	-
HORVU.MOREX.r2.2HG0135520	12.7341	6.97846	32.9658	5.897	- && Q9LYU3.1 RecName: Full=Ethylene-responsive transcription factor ERF113 && PF00847:AP2 domain	AP2
HORVU.MOREX.r2.7HG0569360	3.90054	8.90489	0.823468	7.13979	- && - && -	-
HORVU.MOREX.r2.3HG0185950	15.6546	22.5378	8.31906	30.7145	- && Q10PI6.1 RecName: Full=Lecithin-cholesterol acyltransferase-like 1 && PF02450:Lecithin:cholesterol acyltransferase	-
HORVU.MOREX.r2.4HG0341130	2.56504	0.533069	9.8169	1.00442	- && Q9LXA5.1 RecName: Full=L-type lectin-domain containing receptor kinase IX.1; Short=LecRK-IX.1; Flags: Precursor && PF00069:Protein kinase domain|PF00182:Chitinase class I	Pkinase
HORVU.MOREX.r2.5HG0406540	8.42106	7.06839	15.0842	3.81126	- && Q8LG88.2 RecName: Full=Tonoplast dicarboxylate transporter; Short=AttDT; AltName: Full=Sodium-dicarboxylate cotransporter-like; Short=AtSDAT; AltName: Full=Vacuolar malate transporter && PF00939:Sodium:sulfate symporter transmembrane region	Na_sulph_symp
HORVU.MOREX.r2.7HG0598430	70.3591	199.634	35.1828	200.921	- && - && -	-
HORVU.MOREX.r2.4HG0329440	140.581	308.389	62.3621	320.577	- && P25873.2 RecName: Full=50S ribosomal protein L15, chloroplastic; AltName: Full=CL15; Flags: Precursor && PF00828:Ribosomal protein L18e/L15	-
HORVU.MOREX.r2.1HG0058730	6.6423	3.83228	13.6906	0.5136	- && - && -	-
HORVU.MOREX.r2.5HG0404570	0.968374	0.144826	1.96559	0.0776019	- && Q8RXN0.1 RecName: Full=ABC transporter G family member 11; Short=ABC transporter ABCG.11; Short=AtABCG11; AltName: Full=Protein CUTICULAR DEFECT AND ORGAN FUSION 1; AltName: Full=Protein DESPERADO; AltName: Full=Protein PERMEABLE LEAVES 1; AltName: F	ABC2_membrane
HORVU.MOREX.r2.3HG0203700	50.6026	14.8601	117.362	15.0828	- && Q9FJ45.1 RecName: Full=GDSL esterase/lipase At5g45910; AltName: Full=Extracellular lipase At5g45910; Flags: Precursor && PF00657:GDSL-like Lipase/Acylhydrolase	Lipase_GDSL
HORVU.MOREX.r2.5HG0433760	0	2.02669	0.0553877	3.31335	- && - && -	-
HORVU.MOREX.r2.3HG0202810	0.757792	2.85362	0.360904	5.57603	- && - && PF10604:Polyketide cyclase / dehydrase and lipid transport	-
HORVU.MOREX.r2.3HG0232670	0.377776	0.0391065	4.94852	0.241567	- && - && PF04654:Protein of unknown function, DUF599	-
novel.516	0	1.32807	0	1.22038	- && - && -	-
HORVU.MOREX.r2.5HG0438260	11.3808	28.5416	13.258	39.1469	- && - && PF10539:Development and cell death domain	-
HORVU.MOREX.r2.1HG0011090	46.3892	73.8632	31.5839	95.8205	- && Q9M5K3.2 RecName: Full=Dihydrolipoyl dehydrogenase 1, mitochondrial; Short=AtmLPD1; Short=mtLPD1; AltName: Full=Dihydrolipoamide dehydrogenase 1; AltName: Full=Glycine cleavage system L protein 1; AltName: Full=Pyruvate dehydrogenase complex E3 subun	Pyr_redox_2
HORVU.MOREX.r2.1HG0019450	324.22	504.953	163.658	502.61	- && Q5G8Z3.1 RecName: Full=Protein EGG APPARATUS-1; AltName: Full=ZmEA1 && -	-
HORVU.MOREX.r2.3HG0244560	4.75002	1.75221	7.6868	2.47309	- && O81906.1 RecName: Full=G-type lectin S-receptor-like serine/threonine-protein kinase B120; Flags: Precursor && PF08276:PAN-like domain|PF01453:D-mannose binding lectin|PF07714:Protein tyrosine kinase|PF00954:S-locus glycoprotein domain	Pkinase_Tyr
HORVU.MOREX.r2.1HG0053260	2224.28	677.563	8559.15	653.588	- && - && -	-
HORVU.MOREX.r2.3HG0236180	10.0056	8.29316	55.9221	20.3606	- && Q6L5H6.1 RecName: Full=Probable protein phosphatase 2C 50; Short=OsPP2C50 && PF00481:Protein phosphatase 2C	PP2C
HORVU.MOREX.r2.3HG0208840	1.5954	3.42849	0.686112	4.95671	- && Q9LSM9.2 RecName: Full=Serine carboxypeptidase-like 33; Flags: Precursor && PF00450:Serine carboxypeptidase	Peptidase_S10
HORVU.MOREX.r2.5HG0401550	4.97502	9.2139	3.34506	10.9923	- && - && PF13365:Trypsin-like peptidase domain	-
HORVU.MOREX.r2.3HG0182440	8.58949	16.6609	2.43974	19.9589	- && F4HTT6.1 RecName: Full=Peptidyl-prolyl cis-trans isomerase CYP26-2, chloroplastic; Short=PPIase CYP26-2; AltName: Full=Cyclophilin of 26 kDa 2; AltName: Full=Cyclophilin-26-2; Flags: Precursor && PF00160:Cyclophilin type peptidyl-prolyl cis-trans iso	Pro_isomerase
novel.1818	0.224672	1.76668	0.143127	2.07401	- && Q1KXP9.1 RecName: Full=Putative uncharacterized protein ycf15 (chloroplast) [Helianthus annuus] && -	-
HORVU.MOREX.r2.1HG0037190	33.2771	15.5515	102.008	17.2396	- && O64823.1 RecName: Full=Calcium uniporter protein 2, mitochondrial; Flags: Precursor && PF04678:Mitochondrial calcium uniporter	-
HORVU.MOREX.r2.2HG0109810	31.361	72.4731	11.9292	73.9926	- && A2YMU2.2 RecName: Full=Ribosome-recycling factor, chloroplastic; Short=RRF; AltName: Full=Protein OsL8; AltName: Full=Ribosome-releasing factor, chloroplastic; Flags: Precursor >A3BLC3.2 RecName: Full=Ribosome-recycling factor, chloroplastic; Short=R	-
HORVU.MOREX.r2.2HG0176440	2.27701	6.87639	1.52055	6.66135	- && P11849.2 RecName: Full=Photosystem II D2 protein; Short=PSII D2 protein; AltName: Full=Photosystem Q(A) protein >A1E9Z3.1 RecName: Full=Photosystem II D2 protein; Short=PSII D2 protein; AltName: Full=Photosystem Q(A) protein && PF00124:Photosynthetic	Photo_RC
HORVU.MOREX.r2.5HG0390230	45.8088	69.5332	19.3798	86.0571	- && Q940U6.1 RecName: Full=Protein FLUORESCENT IN BLUE LIGHT, chloroplastic; Flags: Precursor && PF13424:Tetratricopeptide repeat	-
HORVU.MOREX.r2.UnG0624610	1.75355	0.675389	4.49378	0.522684	- && Q9FF31.1 RecName: Full=LEAF RUST 10 DISEASE-RESISTANCE LOCUS RECEPTOR-LIKE PROTEIN KINASE-like 2.1; AltName: Full=Probable receptor-like serine/threonine-protein kinase LRK10L-2.1; Flags: Precursor && PF14380:Wall-associated receptor kinase C-termina	Pkinase_Tyr
HORVU.MOREX.r2.7HG0581010	2.36957	0.594047	5.15027	0.499017	- && Q9SAI1.1 RecName: Full=Factor of DNA methylation 5 && PF03468:XS domain|PF03470:XS zinc finger domain|PF03469:XH domain	-
HORVU.MOREX.r2.1HG0021430	0.939215	0.282113	9.47632	0.321342	- && - && PF12681:Glyoxalase-like domain	-
HORVU.MOREX.r2.5HG0355940	16.1992	5.28766	27.416	5.30318	- && O24653.1 RecName: Full=Guanosine nucleotide diphosphate dissociation inhibitor 2; Short=AtGDI2 && PF00996:GDP dissociation inhibitor	-
HORVU.MOREX.r2.4HG0290030	3.32021	1.42322	12.6465	0.724636	- && - && -	-
HORVU.MOREX.r2.3HG0205180	17.0311	0.652516	21.7695	1.04475	- && - && -	-
HORVU.MOREX.r2.3HG0272080	54.4098	20.1077	258.893	37.3426	- && - && -	-
HORVU.MOREX.r2.UnG0634840	0.30271	5.99222	0	4.38402	- && P0CC87.1 RecName: Full=NAD(P)H-quinone oxidoreductase subunit 2 B, chloroplastic; AltName: Full=NAD(P)H dehydrogenase, subunit 2 B; AltName: Full=NADH-plastoquinone oxidoreductase subunit 2 B >P0CC86.1 RecName: Full=NAD(P)H-quinone oxidoreductase sub	-
HORVU.MOREX.r2.1HG0053820	8.37067	5.21822	28.0387	5.13886	- && - && -	-
HORVU.MOREX.r2.5HG0402660	92.8669	22.7863	246.446	22.5972	- && Q9FMU6.1 RecName: Full=Mitochondrial phosphate carrier protein 3, mitochondrial; AltName: Full=Mitochondrial phosphate transporter 3; Short=MPT3; AltName: Full=Phosphate transporter 3;1; Flags: Precursor && PF00153:Mitochondrial carrier protein	Mito_carr
HORVU.MOREX.r2.7HG0615710	26.9837	5.51783	128.066	18.8237	- && - && -	-
HORVU.MOREX.r2.3HG0275320	76.2915	108.308	9.46681	52.005	- && P30110.1 RecName: Full=Glutathione S-transferase 1; AltName: Full=GST class-phi && PF02798:Glutathione S-transferase, N-terminal domain|PF00043:Glutathione S-transferase, C-terminal domain	GST_N
HORVU.MOREX.r2.3HG0240600	17.1051	34.0681	17.4999	50.4493	- && Q9SLC4.1 RecName: Full=RING-H2 finger protein ATL40; AltName: Full=RING-type E3 ubiquitin transferase ATL40 && PF13639:Ring finger domain	-
HORVU.MOREX.r2.1HG0005990	0.187255	2.21465	0.00815475	2.01602	- && Q43250.1 RecName: Full=3-hydroxyindolin-2-one monooxygenase; AltName: Full=Cytochrome P450 71C1; AltName: Full=Protein benzoxazineless 4 && PF00067:Cytochrome P450	p450
HORVU.MOREX.r2.1HG0070400	0.210232	0	1.17094	0	- && Q9SRQ7.1 RecName: Full=Non-specific phospholipase C4 && PF04185:Phosphoesterase family	Phosphoesterase
HORVU.MOREX.r2.7HG0593880	397.377	91.2818	1374.12	156.896	- && - && PF12734:Cysteine-rich TM module stress tolerance	-
HORVU.MOREX.r2.1HG0070240	50.2004	20.4449	104.666	13.5689	- && - && PF14226:non-haem dioxygenase in morphine synthesis N-terminal	-
HORVU.MOREX.r2.5HG0396260	56.1451	98.8387	20.3069	114.531	- && Q9XIK0.1 RecName: Full=Protein PLASTID REDOX INSENSITIVE 2; Flags: Precursor && -	-
HORVU.MOREX.r2.3HG0184070	2.52678	5.25406	0.925899	4.06517	- && Q9SZJ2.1 RecName: Full=Glycine-rich domain-containing protein 2; Short=AtGRDP2 && PF07173:Protein of unknown function (DUF1399)	-
HORVU.MOREX.r2.7HG0538800	0.0401236	1.64503	0	1.88756	- && - && PF05699:hAT family C-terminal dimerisation region	hATC
novel.1294	0	1.48569	0	1.53988	- && - && -	-
HORVU.MOREX.r2.1HG0072910	0.180087	2.08767	0.0788127	2.10351	- && Q0V7S0.1 RecName: Full=F-box protein At1g47340 && PF00646:F-box domain	F-box
HORVU.MOREX.r2.5HG0385810	0.909527	0.545112	6.91373	0.43981	- && D4N501.1 RecName: Full=Probable 2-oxoglutarate/Fe(II)-dependent dioxygenase && PF03171:2OG-Fe(II) oxygenase superfamily|PF14226:non-haem dioxygenase in morphine synthesis N-terminal	2OG-FeII_Oxy
HORVU.MOREX.r2.1HG0012690	0	2.59142	0	2.47319	- && - && -	-
HORVU.MOREX.r2.7HG0595550	16.7852	38.5125	5.8031	37.1018	- && Q42400.1 RecName: Full=Amino acid permease 1; AltName: Full=Amino acid transporter AAP1; AltName: Full=Neutral amino acid transporter II && PF01490:Transmembrane amino acid transporter protein	Aa_trans
HORVU.MOREX.r2.3HG0182210	0.167283	1.18503	0.063995	1.1204	- && Q8RY25.1 RecName: Full=Nuclear pore complex protein NUP98A; AltName: Full=Nucleoporin 98A; AltName: Full=Nucleoporin autopeptidase && PF00892:EamA-like transporter family|PF04096:Nucleoporin autopeptidase|PF03552:Cellulose synthase	DUF6
HORVU.MOREX.r2.7HG0610210	26.1552	14.931	39.5536	11.2762	- && Q84TE6.2 RecName: Full=NAC domain-containing protein 21/22; Short=ANAC021/ANAC022 && PF02365:No apical meristem (NAM) protein	NAM
HORVU.MOREX.r2.7HG0614970	10.2062	39.2141	5.10299	35.9909	- && - && -	-
HORVU.MOREX.r2.1HG0002210	4.988	7.30694	0.927038	5.53335	- && Q69TI0.1 RecName: Full=Putative 12-oxophytodienoate reductase 5; AltName: Full=OPDA-reductase 5; Short=OsOPR5 && PF00724:NADH:flavin oxidoreductase / NADH oxidase family	Oxidored_FMN
HORVU.MOREX.r2.2HG0150210	33.1577	12.0026	110.791	26.1742	- && Q9H773.1 RecName: Full=dCTP pyrophosphatase 1; AltName: Full=Deoxycytidine-triphosphatase 1; Short=dCTPase 1; AltName: Full=RS21C6; AltName: Full=XTP3-transactivated gene A protein && PF03819:MazG nucleotide pyrophosphohydrolase domain	-
HORVU.MOREX.r2.3HG0195030	10.5107	7.65104	43.6004	8.65807	- && - && -	-
HORVU.MOREX.r2.6HG0508720	150.307	14.8333	268.794	26.8152	- && - && -	-
HORVU.MOREX.r2.6HG0455390	33.3284	87.9709	12.3901	79.1169	- && - && -	-
HORVU.MOREX.r2.2HG0160760	15.5528	3.1317	65.7273	4.55491	- && - && PF14368:Probable lipid transfer	-
HORVU.MOREX.r2.5HG0351680	0.190975	1.84832	0.00755664	1.8642	- && C5YHH7.2 RecName: Full=Zingiberene synthase; Short=SbTPS1 && PF01397:Terpene synthase, N-terminal domain|PF03936:Terpene synthase family, metal binding domain	-
HORVU.MOREX.r2.2HG0173550	11.9365	4.50316	24.3191	4.21896	- && O03982.1 RecName: Full=Heavy metal-associated isoprenylated plant protein 39; Short=AtHIP39; Flags: Precursor && -	-
HORVU.MOREX.r2.1HG0019390	0.447734	1.98273	0.409111	2.74363	- && Q9LMA1.1 RecName: Full=Probable flavin-containing monooxygenase 1 && PF00743:Flavin-binding monooxygenase-like	FMO-like
HORVU.MOREX.r2.1HG0047140	3.61289	7.59742	2.41573	7.99645	- && F4J264.1 RecName: Full=Peptide chain release factor PrfB3, chloroplastic; Short=AtPrfB3; Flags: Precursor && PF00472:RF-1 domain|PF03462:PCRF domain	-
HORVU.MOREX.r2.3HG0221970	11.5005	22.3996	4.65495	27.0949	- && Q38932.2 RecName: Full=Lycopene epsilon cyclase, chloroplastic; AltName: Full=Protein LUTEIN DEFICIENT 2; Flags: Precursor && PF05834:Lycopene cyclase protein	-
HORVU.MOREX.r2.3HG0246670	31.258	18.1723	107.625	21.4066	- && Q9C9Z2.1 RecName: Full=Protein RETICULATA-RELATED 3, chloroplastic; Flags: Precursor && PF11891:Domain of unknown function (DUF3411)	-
HORVU.MOREX.r2.2HG0141090	1.29334	0.179202	4.68577	0.397042	- && - && PF08241:Methyltransferase domain	Methyltransf_11
HORVU.MOREX.r2.1HG0073300	18.885	21.0866	5.78983	15.336	- && Q9SCZ4.1 RecName: Full=Receptor-like protein kinase FERONIA; AltName: Full=Protein SIRENE; Flags: Precursor && PF07714:Protein tyrosine kinase|PF12819:Carbohydrate-binding protein of the ER	Pkinase_Tyr
HORVU.MOREX.r2.7HG0617860	181.043	310.715	102.819	278.116	- && P21616.4 RecName: Full=Pyrophosphate-energized vacuolar membrane proton pump; AltName: Full=Pyrophosphate-energized inorganic pyrophosphatase; Short=H(+)-PPase; AltName: Full=Vacuolar H(+)-pyrophosphatase && PF03030:Inorganic H+ pyrophosphatase	-
HORVU.MOREX.r2.6HG0453510	3.87587	0.709634	16.1315	1.54194	- && O23791.1 RecName: Full=Fruit bromelain; AltName: Allergen=Ana c 2; Flags: Precursor && PF08246:Cathepsin propeptide inhibitor domain (I29)|PF00112:Papain family cysteine protease	Peptidase_C1
HORVU.MOREX.r2.6HG0470280	58.6519	10.1693	127.187	16.5717	- && Q9AV57.1 RecName: Full=Flotillin-like protein 1; AltName: Full=Nodulin-like protein 1 && PF01145:SPFH domain / Band 7 family	-
novel.420	0.433937	2.38109	0.150172	3.15369	- && - && -	-
HORVU.MOREX.r2.7HG0621840	1.49823	0.168992	4.30238	0.0197786	- && B5X570.1 RecName: Full=NAC domain-containing protein 14; Short=ANAC014; AltName: Full=Protein NTM1-like 2 && PF02365:No apical meristem (NAM) protein	NAM
HORVU.MOREX.r2.4HG0343720	109.698	161.095	54.4344	172.204	- && Q9MAP3.1 RecName: Full=50S ribosomal protein L11, chloroplastic; AltName: Full=CL11; Flags: Precursor && PF00298:Ribosomal protein L11, RNA binding domain|PF03946:Ribosomal protein L11, N-terminal domain	-
HORVU.MOREX.r2.5HG0394280	17.0141	5.31731	62.336	8.71465	- && - && PF05553:Cotton fibre expressed protein	-
novel.278	0.590602	8.95274	0.0977237	5.26846	- && - && -	-
HORVU.MOREX.r2.5HG0349880	38.2833	13.3633	88.2668	16.6199	- && Q9LXA5.1 RecName: Full=L-type lectin-domain containing receptor kinase IX.1; Short=LecRK-IX.1; Flags: Precursor && PF00139:Legume lectin domain|PF00069:Protein kinase domain	Pkinase
HORVU.MOREX.r2.7HG0532730	2.11226	1.09587	6.35123	0.184056	- && Q06398.2 RecName: Full=Probable glutathione S-transferase GSTU6; AltName: Full=28 kDa cold-induced protein && PF14497:Glutathione S-transferase, C-terminal domain|PF13417:Glutathione S-transferase, N-terminal domain	-
HORVU.MOREX.r2.7HG0620680	66.4293	23.5251	105.54	15.9161	- && Q41001.1 RecName: Full=Blue copper protein; Flags: Precursor && PF02298:Plastocyanin-like domain	Cu_bind_like
HORVU.MOREX.r2.3HG0235230	0.679987	10.4287	0.192695	9.98895	- && Q95H43.2 RecName: Full=NAD(P)H-quinone oxidoreductase subunit 1, chloroplastic; AltName: Full=NAD(P)H dehydrogenase subunit 1; Short=NDH subunit 1; AltName: Full=NADH-plastoquinone oxidoreductase subunit 1 && PF00146:NADH dehydrogenase	-
HORVU.MOREX.r2.3HG0263870	143.948	29.3239	526.672	42.582	- && D9J0Z8.1 RecName: Full=Inactive anthranilate O-methyltransferase 1; AltName: Full=Anthranilic acid methyltransferase 1; AltName: Full=O-methyltransferase 1 && PF03492:SAM dependent carboxyl methyltransferase	-
HORVU.MOREX.r2.2HG0088360	0	1.04338	0	1.67315	- && - && PF12776:Myb/SANT-like DNA-binding domain	-
HORVU.MOREX.r2.3HG0201000	2.30382	1.65082	5.91674	1.0364	- && Q9FG13.1 RecName: Full=Probable carboxylesterase 15; AltName: Full=AtCXE15 && PF07859:alpha/beta hydrolase fold	Abhydrolase_3
HORVU.MOREX.r2.3HG0186310	183.5	102.97	739.553	125.434	- && Q9LY84.1 RecName: Full=GDSL esterase/lipase At5g14450; AltName: Full=Extracellular lipase At5g14450; Flags: Precursor && PF00657:GDSL-like Lipase/Acylhydrolase	Lipase_GDSL
HORVU.MOREX.r2.5HG0402390	8.01682	4.05143	21.1028	1.63216	- && Q6H5X0.1 RecName: Full=Putative ripening-related protein 2; Flags: Precursor && -	-
HORVU.MOREX.r2.5HG0356660	2.07394	0.231361	2.4251	0.165173	- && Q06398.2 RecName: Full=Probable glutathione S-transferase GSTU6; AltName: Full=28 kDa cold-induced protein && PF13417:Glutathione S-transferase, N-terminal domain|PF13410:Glutathione S-transferase, C-terminal domain	-
HORVU.MOREX.r2.5HG0439310	243.655	467.105	87.2717	447.487	- && Q8SAY0.1 RecName: Full=50S ribosomal protein L18, chloroplastic; AltName: Full=CL18; Flags: Precursor && PF00861:Ribosomal L18p/L5e family	-
HORVU.MOREX.r2.4HG0348360	0.910562	0.332114	7.81424	0.756688	- && Q6EUG4.1 RecName: Full=Heat stress transcription factor C-2a; AltName: Full=Heat stress transcription factor 5; Short=OsHsf-05 && PF00447:HSF-type DNA-binding	HSF_DNA-bind
novel.1065	15.1678	42.7635	7.1434	38.5013	- && A1EA04.1 RecName: Full=ATP synthase subunit b, chloroplastic; AltName: Full=ATP synthase F(0) sector subunit b; AltName: Full=ATPase subunit I && PF00430:ATP synthase B/B' CF(0)	-
novel.1728	0.154857	3.05841	0.0584013	2.04887	- && - && -	-
HORVU.MOREX.r2.7HG0611160	31.5781	10.4394	68.0085	12.2131	- && Q700D9.2 RecName: Full=Putative Myb family transcription factor At1g14600 && PF00249:Myb-like DNA-binding domain	Myb_DNA-binding
HORVU.MOREX.r2.3HG0236740	0.168294	0.278054	2.38157	0.170893	- && Q94LW6.1 RecName: Full=Probable sulfate transporter 3.5 && PF01740:STAS domain|PF00916:Sulfate permease family	Sulfate_transp
HORVU.MOREX.r2.2HG0106450	2.87862	0.902318	13.3822	1.11696	- && Q7FAE1.1 RecName: Full=Momilactone A synthase; Short=OsMAS && PF00106:short chain dehydrogenase	adh_short
HORVU.MOREX.r2.3HG0256100	56.7487	24.5915	101.293	16.2192	- && - && -	-
HORVU.MOREX.r2.4HG0337070	2.2403	0.0848741	5.31928	0.057208	- && Q9ZUF7.1 RecName: Full=Protein LURP-one-related 6 && PF04525:LURP-one-related	-
HORVU.MOREX.r2.2HG0114990	8.46009	1.33094	59.0771	7.90678	- && Q9FGG3.1 RecName: Full=WAT1-related protein At5g64700 && PF00892:EamA-like transporter family	DUF6
HORVU.MOREX.r2.5HG0398780	5.7419	9.98756	2.13005	9.48577	- && Q8L785.1 RecName: Full=Glycine--tRNA ligase, chloroplastic/mitochondrial 2; AltName: Full=Glycyl-tRNA synthetase 2; Short=GlyRS-2; AltName: Full=Protein EMBRYO-DEFECTIVE-DEVELOPMENT 1; Flags: Precursor && PF05746:DALR anticodon binding domain	-
HORVU.MOREX.r2.7HG0611170	27.448	9.01415	49.3557	9.36443	- && Q700D9.2 RecName: Full=Putative Myb family transcription factor At1g14600 && PF00249:Myb-like DNA-binding domain	Myb_DNA-binding
HORVU.MOREX.r2.3HG0201910	5.06145	8.75119	1.8664	9.97269	- && Q9SN39.1 RecName: Full=Pentatricopeptide repeat-containing protein DOT4, chloroplastic; AltName: Full=Protein DEFECTIVELY ORGANIZED TRIBUTARIES 4; AltName: Full=Protein FLAVODENTATA; Flags: Precursor && PF13041:PPR repeat family|PF01535:PPR repeat|PF	PPR
HORVU.MOREX.r2.5HG0362860	0.420804	2.76198	0.365622	2.61643	- && - && -	-
HORVU.MOREX.r2.3HG0245170	161.363	95.5072	332.247	106.057	- && - && -	-
HORVU.MOREX.r2.1HG0051960	60.0766	30.614	224.948	43.673	- && Q7F2L3.1 RecName: Full=NAC domain-containing protein 48; Short=ONAC048 && PF02365:No apical meristem (NAM) protein	NAM
HORVU.MOREX.r2.3HG0239800	153.873	262.75	64.9145	266.66	- && Q9SYL9.1 RecName: Full=50S ribosomal protein L13, chloroplastic; AltName: Full=CL13; AltName: Full=Protein EMBRYO DEFECTIVE 1473; Flags: Precursor && PF00572:Ribosomal protein L13	-
HORVU.MOREX.r2.1HG0051320	46.7335	21.2781	89.0176	19.0316	- && B6ZJZ9.1 RecName: Full=Peroxisomal adenine nucleotide carrier 1; Short=GmPNC1 && PF00153:Mitochondrial carrier protein	Mito_carr
HORVU.MOREX.r2.2HG0122860	3.97732	8.16727	1.61855	6.60002	- && F4KE63.1 RecName: Full=Valine--tRNA ligase, chloroplastic/mitochondrial 2; AltName: Full=Protein EMBRYO DEFECTIVE 2247; AltName: Full=Valyl-tRNA synthetase; Short=ValRS; Flags: Precursor && PF08264:Anticodon-binding domain of tRNA|PF10458:Valyl tRNA	-
HORVU.MOREX.r2.3HG0241790	20.267	7.38026	69.8531	12.9841	- && Q9SD81.1 RecName: Full=Glycerophosphodiester phosphodiesterase GDPD6; AltName: Full=Glycerophosphodiester phosphodiesterase 6; Short=ATGDPD6; Flags: Precursor && PF03009:Glycerophosphoryl diester phosphodiesterase family	-
HORVU.MOREX.r2.1HG0065130	1.21084	1.96231	0.952233	7.34906	- && Q94AJ5.1 RecName: Full=Probable polygalacturonase At1g80170; Short=PG; AltName: Full=Pectinase At1g80170; Flags: Precursor && PF00295:Glycosyl hydrolases family 28	-
HORVU.MOREX.r2.3HG0181790	10.9188	7.79914	33.949	11.6633	- && Q6ZHZ1.1 RecName: Full=Probable sucrose-phosphate synthase 4; AltName: Full=Sucrose phosphate synthase 4F; Short=OsSPS4F; AltName: Full=UDP-glucose-fructose-phosphate glucosyltransferase && PF05116:Sucrose-6F-phosphate phosphohydrolase|PF00534:Glycos	Glycos_transf_1
HORVU.MOREX.r2.6HG0476600	45.6542	23.4762	87.194	24.3789	- && A8KBL5.2 RecName: Full=Putative sodium-coupled neutral amino acid transporter 11; AltName: Full=Solute carrier family 38 member 11 && PF01490:Transmembrane amino acid transporter protein	Aa_trans
HORVU.MOREX.r2.3HG0239300	1.87024	3.97963	1.23526	5.07296	- && P69781.1 RecName: Full=GATA transcription factor 12 && PF00320:GATA zinc finger	GATA
HORVU.MOREX.r2.UnG0628020	0.802569	4.3037	0.557024	5.06222	- && A1E9J1.1 RecName: Full=Photosystem I P700 chlorophyll a apoprotein A1; AltName: Full=PSI-A; AltName: Full=PsaA && PF00223:Photosystem I psaA/psaB protein	-
HORVU.MOREX.r2.UnG0635000	1.66999	10.8355	0.49786	8.44675	- && A8Y9H7.1 RecName: Full=ATP synthase subunit beta, chloroplastic; AltName: Full=ATP synthase F1 sector subunit beta; AltName: Full=F-ATPase subunit beta && PF00006:ATP synthase alpha/beta family, nucleotide-binding domain	ATP-synt_ab
HORVU.MOREX.r2.6HG0452400	0.216177	0.778018	0.0422748	0.930739	- && - && PF13968:Domain of unknown function (DUF4220)|PF04578:Protein of unknown function, DUF594	-
novel.735	0.515269	0.130494	2.38003	0.102457	- && - && -	-
HORVU.MOREX.r2.5HG0432800	8.37918	17.0642	3.3595	22.2604	- && - && -	-
HORVU.MOREX.r2.1HG0040550	2.98135	0.0707978	3.7137	0.151701	- && Q06398.2 RecName: Full=Probable glutathione S-transferase GSTU6; AltName: Full=28 kDa cold-induced protein && PF00043:Glutathione S-transferase, C-terminal domain|PF02798:Glutathione S-transferase, N-terminal domain	GST_N
HORVU.MOREX.r2.1HG0025690	0.0167973	1.54382	0	1.71241	- && - && -	-
HORVU.MOREX.r2.1HG0012530	0.863295	0.130889	3.32145	0.220621	- && P0C1U5.1 RecName: Full=Endoglucanase 14; AltName: Full=Endo-1,4-beta glucanase 14; Flags: Precursor && PF00759:Glycosyl hydrolase family 9	-
HORVU.MOREX.r2.2HG0101040	3558.53	1641.17	3432.71	1303.88	- && P08626.1 RecName: Full=Subtilisin-chymotrypsin inhibitor-2B; Short=CI-2B && PF00280:Potato inhibitor I family	-
HORVU.MOREX.r2.2HG0085290	53.9847	85.366	24.869	80.8871	- && Q9LVV5.2 RecName: Full=Thylakoid lumenal 15.0 kDa protein 2, chloroplastic; Flags: Precursor && -	-
HORVU.MOREX.r2.5HG0397900	19.0431	5.57584	36.264	8.50895	- && Q8GXZ3.1 RecName: Full=Serine/threonine-protein kinase At5g01020 && PF07714:Protein tyrosine kinase	Pkinase_Tyr
HORVU.MOREX.r2.5HG0415740	4.54503	1.43756	14.6437	1.00167	- && - && -	-
HORVU.MOREX.r2.3HG0252820	37.2683	6.6751	137.347	11.2813	- && - && PF13912:C2H2-type zinc finger	-
HORVU.MOREX.r2.1HG0021410	35.8816	26.8757	92.1861	18.6538	- && - && PF12681:Glyoxalase-like domain	-
novel.1175	1.75597	0.487876	6.39643	0.90101	- && - && -	-
HORVU.MOREX.r2.6HG0479630	26.6382	7.51903	79.5163	9.72482	- && - && -	-
HORVU.MOREX.r2.2HG0159320	18.2167	3.20033	42.0071	3.84076	- && Q9SGU2.1 RecName: Full=Auxin-responsive protein SAUR71; AltName: Full=Protein SMALL AUXIN UP RNA 71 && PF02519:Auxin responsive protein	Auxin_inducible
HORVU.MOREX.r2.5HG0394350	32.5751	7.67174	52.5315	9.77694	- && P14133.1 RecName: Full=L-ascorbate oxidase; Short=ASO; Short=Ascorbase; Flags: Precursor && PF07731:Multicopper oxidase|PF00394:Multicopper oxidase|PF07732:Multicopper oxidase	-
HORVU.MOREX.r2.2HG0088540	22.4113	6.51693	22.4238	4.06696	- && O49621.1 RecName: Full=MLO-like protein 1; Short=AtMlo1; AltName: Full=MLO protein homolog 1; Short=AtMlo-H1 && PF03094:Mlo family	-
HORVU.MOREX.r2.6HG0464000	4.70305	11.7156	3.22968	16.3051	- && - && -	-
HORVU.MOREX.r2.4HG0287960	37.2243	5.75292	68.5005	10.3499	- && Q9SXB8.3 RecName: Full=G-type lectin S-receptor-like serine/threonine-protein kinase At1g11330; Flags: Precursor && PF00069:Protein kinase domain	Pkinase
HORVU.MOREX.r2.6HG0495510	1.67998	2.40921	0.606417	6.52263	- && Q9FTA0.1 RecName: Full=GEM-like protein 4 && PF02893:GRAM domain	GRAM
HORVU.MOREX.r2.3HG0265950	1.86983	1.10671	4.63103	1.12575	- && Q5JLP4.1 RecName: Full=Cytokinin dehydrogenase 4; AltName: Full=Cytokinin oxidase 4; Short=OsCKX4; Flags: Precursor && PF09265:Cytokinin dehydrogenase 1, FAD and cytokinin binding|PF01565:FAD binding domain	FAD_binding_4
HORVU.MOREX.r2.4HG0342410	9.15279	19.0854	3.09318	18.8076	- && - && -	-
HORVU.MOREX.r2.7HG0587270	40.5841	19.7503	81.1492	29.0843	- && Q8T045.1 RecName: Full=O-glucosyltransferase rumi; Flags: Precursor && PF05686:Glycosyl transferase family 90	-
HORVU.MOREX.r2.1HG0011850	120.794	183.981	43.9045	213.801	- && - && -	-
HORVU.MOREX.r2.3HG0241870	2.05737	0.690756	9.62281	0.805094	- && O82451.3 RecName: Full=Probable glutathione S-transferase GSTF2; AltName: Full=GST-II && PF02798:Glutathione S-transferase, N-terminal domain|PF00043:Glutathione S-transferase, C-terminal domain	GST_N
HORVU.MOREX.r2.5HG0385340	788.212	344.18	1831.11	386.545	- && P29036.2 RecName: Full=Ferritin-1, chloroplastic; AltName: Full=ZmFer1; Flags: Precursor && PF00210:Ferritin-like domain	Ferritin
HORVU.MOREX.r2.UnG0635540	0.145914	3.40033	0.0995079	2.72955	- && A1EA00.1 RecName: Full=DNA-directed RNA polymerase subunit beta''; AltName: Full=PEP; AltName: Full=Plastid-encoded RNA polymerase subunit beta''; Short=RNA polymerase subunit beta'' && PF04998:RNA polymerase Rpb1, domain 5	-
HORVU.MOREX.r2.7HG0603690	9.5233	2.00715	11.7334	1.71972	- && Q6H3Z3.1 RecName: Full=Iron-phytosiderophore transporter YSL15; AltName: Full=Protein YELLOW STRIPE LIKE 15; Short=OsYSL15 && PF03169:OPT oligopeptide transporter protein	OPT
HORVU.MOREX.r2.4HG0344830	5.59213	12.7475	3.01506	18.6823	- && Q9LEX0.1 RecName: Full=F-box protein PP2-A13; AltName: Full=Protein PHLOEM PROTEIN 2-LIKE A13; Short=AtPP2-A13; AltName: Full=SKP1-interacting partner 9 && PF14299:Phloem protein 2	-
HORVU.MOREX.r2.2HG0100050	7.86746	2.455	22.3326	3.15172	- && F4IK45.1 RecName: Full=Cytochrome P450 709B2 && PF00067:Cytochrome P450	p450
HORVU.MOREX.r2.3HG0245260	29.3867	6.50935	61.3005	8.07441	- && Q9SZY3.1 RecName: Full=Subtilisin-like protease SBT3.8; AltName: Full=Subtilase subfamily 3 member 8; Short=AtSBT3.8; Flags: Precursor && PF00082:Subtilase family|PF05922:Peptidase inhibitor I9	Peptidase_S8
HORVU.MOREX.r2.2HG0162260	80.8788	108.855	5.86491	32.9513	- && P26154.1 RecName: Full=Cold-regulated protein BLT14 && -	-
HORVU.MOREX.r2.5HG0430290	1.89981	6.72961	0.397909	5.47844	- && Q96316.1 RecName: Full=Uclacyanin-3; Short=Uclacyanin-III; AltName: Full=Blue copper-binding protein III; Short=BCB III; AltName: Full=Phytocyanin 3; Flags: Precursor && PF02298:Plastocyanin-like domain	Cu_bind_like
HORVU.MOREX.r2.UnG0634140	1.0098	8.42566	1.01347	7.38165	- && A1EA02.1 RecName: Full=ATP synthase subunit a, chloroplastic; AltName: Full=ATP synthase F0 sector subunit a; AltName: Full=F-ATPase subunit IV && -	-
novel.1428	5.35575	2.46536	10.6477	2.55668	- && - && -	-
HORVU.MOREX.r2.5HG0414110	147.013	74.4473	364.463	67.4675	- && Q6H795.1 RecName: Full=Chaperone protein ClpD1, chloroplastic; AltName: Full=ATP-dependent Clp protease ATP-binding subunit ClpD homolog 1; AltName: Full=Casein lytic proteinase D1; Flags: Precursor && PF02861:Clp amino terminal domain, pathogenicity	AAA
HORVU.MOREX.r2.1HG0059960	4.24091	1.97731	9.57973	1.32955	- && Q8W486.1 RecName: Full=Uncharacterized protein At1g04910 && PF10250:GDP-fucose protein O-fucosyltransferase	-
HORVU.MOREX.r2.6HG0515810	166.196	84.1193	355.866	71.3186	- && Q9SMZ4.1 RecName: Full=Alpha-aminoadipic semialdehyde synthase; AltName: Full=cAt-LKR/SDH; Short=LKR/SDH; Includes: RecName: Full=Lysine ketoglutarate reductase; Short=LKR; Includes: RecName: Full=Saccharopine dehydrogenase; AltName: Full=cAt-SDH; Sh	Saccharop_dh
HORVU.MOREX.r2.5HG0412080	2.85952	0.576441	4.81454	0.753979	- && Q9M667.2 RecName: Full=Disease resistance protein RPP13; AltName: Full=Resistance to Peronospora parasitica protein 13 && PF00931:NB-ARC domain	NB-ARC
novel.882	0.498404	4.00174	0.462554	4.0171	- && - && -	-
HORVU.MOREX.r2.5HG0388190	343.362	217.469	833.464	217.967	- && Q6K439.1 RecName: Full=Probable plastid-lipid-associated protein 2, chloroplastic; AltName: Full=Fibrillin-like protein 2; Flags: Precursor && PF04755:PAP_fibrillin	-
HORVU.MOREX.r2.4HG0283440	432.577	256.996	837.063	251.339	- && Q4R5M2.1 RecName: Full=Cathepsin B; Contains: RecName: Full=Cathepsin B light chain; Contains: RecName: Full=Cathepsin B heavy chain; Flags: Precursor && PF00112:Papain family cysteine protease|PF08127:Peptidase family C1 propeptide	Peptidase_C1
HORVU.MOREX.r2.4HG0343900	142.878	484.724	262.775	1553.72	- && Q5MAU8.1 RecName: Full=Probable inactive purple acid phosphatase 27; Flags: Precursor && PF16656:Purple acid Phosphatase, N-terminal domain|PF14008:Iron/zinc purple acid phosphatase-like protein C|PF00149:Calcineurin-like phosphoesterase	Metallophos
novel.81	1.4668	3.8923	0.140996	2.48066	- && - && -	-
HORVU.MOREX.r2.1HG0006790	0.264205	8.18732	0.223323	6.27377	- && - && -	-
HORVU.MOREX.r2.2HG0172670	4.68561	1.47478	9.54773	1.78244	- && Q9LZD3.1 RecName: Full=Exocyst complex component EXO70A1; Short=AtExo70a1; AltName: Full=Exocyst subunit Exo70 family protein A1 && PF03081:Exo70 exocyst complex subunit	Exo70
HORVU.MOREX.r2.2HG0145390	0	1.86236	0	2.5969	- && - && PF03732:Retrotransposon gag protein	Retrotrans_gag
HORVU.MOREX.r2.6HG0515620	3.17776	7.59231	1.20355	9.56546	- && F8WKW1.1 RecName: Full=7-deoxyloganetin glucosyltransferase; AltName: Full=Genipin glucosyltransferase; AltName: Full=UDP-glucose glucosyltransferase 2; Short=GjUGT2; AltName: Full=UDP-glycosyltransferase 85A24 && PF00201:UDP-glucoronosyl and UDP-glu	UDPGT
HORVU.MOREX.r2.2HG0085980	2.64593	4.56123	0.874399	12.6813	- && P26667.1 RecName: Full=Ribulose bisphosphate carboxylase small chain PW9, chloroplastic; Short=RuBisCO small subunit PW9; Flags: Precursor && PF12338:Ribulose-1,5-bisphosphate carboxylase small subunit|PF00101:Ribulose bisphosphate carboxylase, small	-
HORVU.MOREX.r2.6HG0457660	42.8028	85.5271	22.8803	93.1236	- && Q67YC9.1 RecName: Full=Uncharacterized protein At4g14100; Flags: Precursor && -	-
HORVU.MOREX.r2.4HG0344600	35.5914	15.9721	81.853	12.9295	- && Q9LDX3.1 RecName: Full=UDP-galactose/UDP-glucose transporter 4; Short=AtUTr4 && PF08449:UAA transporter family	-
HORVU.MOREX.r2.7HG0587860	100.678	75.4148	307.403	116.742	- && Q94BN2.1 RecName: Full=Spermine synthase; Short=SPMSY; AltName: Full=Spermidine aminopropyltransferase && PF01564:Spermine/spermidine synthase	-
HORVU.MOREX.r2.UnG0635990	3.45825	11.0514	1.78327	9.64592	- && B3TNB9.1 RecName: Full=Photosystem II CP43 reaction center protein; AltName: Full=PSII 43 kDa protein; AltName: Full=Protein CP-43; Flags: Precursor && PF00421:Photosystem II protein	-
HORVU.MOREX.r2.2HG0144950	1.24616	0.56505	3.55786	0.684947	- && Q9FGS8.1 RecName: Full=C2 and GRAM domain-containing protein At5g50170 && PF02893:GRAM domain|PF00168:C2 domain|PF16016:Domain of unknown function (DUF4782)	GRAM
HORVU.MOREX.r2.7HG0531390	0.452284	6.44941	0.690583	6.39291	- && - && -	-
HORVU.MOREX.r2.6HG0487780	3.28746	23.0109	2.66291	19.841	- && Q95H62.1 RecName: Full=30S ribosomal protein S14, chloroplastic >A1E9I9.1 RecName: Full=30S ribosomal protein S14, chloroplastic && PF00253:Ribosomal protein S14p/S29e	Ribosomal_S14
HORVU.MOREX.r2.7HG0623920	0.35084	0.123018	0.861615	0.0884395	- && - && -	-
HORVU.MOREX.r2.6HG0481590	1.17645	0.223513	15.1468	0.993593	- && Q9FZ62.1 RecName: Full=Inorganic pyrophosphatase 2; Short=AtPPsPase2; Short=PPi phosphatase 2; Short=Pyrophosphate-specific phosphatase 2 && PF06888:Putative Phosphatase	-
HORVU.MOREX.r2.7HG0572130	378.651	728.299	180.345	846.066	- && P19683.1 RecName: Full=31 kDa ribonucleoprotein, chloroplastic; Flags: Precursor && PF00076:RNA recognition motif. (a.k.a. RRM, RBD, or RNP domain)	RRM_1
HORVU.MOREX.r2.3HG0250430	0.101778	0	1.24947	0.0476757	- && O65351.1 RecName: Full=Subtilisin-like protease SBT1.7; AltName: Full=Cucumisin-like serine protease; AltName: Full=Subtilase subfamily 1 member 7; Short=AtSBT1.7; AltName: Full=Subtilisin-like serine protease 1; Short=At-SLP1; Flags: Precursor && PF	Peptidase_S8
HORVU.MOREX.r2.3HG0204350	69.7393	215.714	106.371	351.864	- && - && PF04832:SOUL heme-binding protein	-
HORVU.MOREX.r2.3HG0184690	18.0491	9.58548	38.4038	9.60687	- && Q5ZEG0.1 RecName: Full=Protein MAO HUZI 4, chloroplastic; Flags: Precursor && PF14108:Domain of unknown function (DUF4281)	-
HORVU.MOREX.r2.3HG0230480	10.9951	1.85636	23.5874	3.11233	- && Q9XI60.1 RecName: Full=Lipid phosphate phosphatase 2; Short=AtLPP2; AltName: Full=Phosphatidic acid phosphatase 2; Short=AtPAP2; AltName: Full=Prenyl diphosphate phosphatase && PF01569:PAP2 superfamily	-
HORVU.MOREX.r2.7HG0566200	0.0598519	4.65153	0	2.81904	- && - && -	-
HORVU.MOREX.r2.2HG0083230	19.8038	9.62245	43.6699	9.67905	- && Q9FGF0.1 RecName: Full=Phosphoglycerate mutase-like protein 1 && -	-
HORVU.MOREX.r2.5HG0401690	3.22756	0.608191	10.4475	0.865691	- && - && PF04819:Family of unknown function (DUF716)	-
HORVU.MOREX.r2.3HG0274290	0.255364	6.26273	0.246476	4.004	- && - && -	-
HORVU.MOREX.r2.5HG0399300	20.5129	10.5444	30.3813	9.39865	- && Q9C5V5.2 RecName: Full=Glutamate receptor 2.8; AltName: Full=Ligand-gated ion channel 2.8; Flags: Precursor && PF00497:Bacterial extracellular solute-binding proteins, family 3|PF01094:Receptor family ligand binding region|PF00060:Ligand-gated ion ch	ANF_receptor
HORVU.MOREX.r2.5HG0427940	22.4375	32.6793	10.3439	34.1993	- && P37518.1 RecName: Full=Ribosome-binding ATPase YchF && PF06071:Protein of unknown function (DUF933)|PF01926:50S ribosome-binding GTPase	-
novel.1501	1.5216	0.299892	10.729	0.185264	- && - && -	-
HORVU.MOREX.r2.7HG0605490	16.1613	7.72198	42.4351	11.529	- && Q9LDQ3.3 RecName: Full=Putative cysteine-rich receptor-like protein kinase 35; Short=Cysteine-rich RLK35; Flags: Precursor && PF00069:Protein kinase domain	Pkinase
HORVU.MOREX.r2.5HG0441570	79.8207	19.8597	93.4155	20.5031	- && Q851M9.1 RecName: Full=Ammonium transporter 3 member 2; Short=OsAMT3;2 && PF00909:Ammonium Transporter Family	Ammonium_transp
HORVU.MOREX.r2.1HG0026800	0.491452	4.25178	0.0353166	4.33033	- && - && -	-
HORVU.MOREX.r2.4HG0281730	1.9544	7.3793	1.12763	6.81566	- && - && -	-
HORVU.MOREX.r2.4HG0322480	0.240043	0	3.31735	0	- && - && PF12681:Glyoxalase-like domain	-
HORVU.MOREX.r2.1HG0059620	2.49458	0.607718	11.3189	1.0056	- && Q0PGJ6.1 RecName: Full=Aldo-keto reductase family 4 member C9 && PF00248:Aldo/keto reductase family	Aldo_ket_red
HORVU.MOREX.r2.1HG0073940	3.38355	0	6.17488	0.149296	- && - && -	-
novel.1046	0.366918	1.57207	0	1.70774	- && - && -	-
HORVU.MOREX.r2.4HG0319270	40.5773	10.2619	88.6842	14.5489	- && - && PF06880:Protein of unknown function (DUF1262)	-
HORVU.MOREX.r2.1HG0003770	70.7037	44.2859	91.2336	33.9151	- && - && -	-
HORVU.MOREX.r2.2HG0154400	3.52763	9.76949	2.86544	11.4848	- && Q8LPG1.1 RecName: Full=Protein FATTY ACID EXPORT 4, chloroplastic; Short=At-FAX4; Flags: Precursor && PF03647:Transmembrane proteins 14C	-
HORVU.MOREX.r2.3HG0234530	1.16554	0.271542	3.90765	0.45076	- && O22040.2 RecName: Full=Mitogen-activated protein kinase kinase kinase ANP1; AltName: Full=Arabidopsis NPK1-related kinase 1 && PF00069:Protein kinase domain	Pkinase
HORVU.MOREX.r2.5HG0442960	226.571	387.349	120.459	433.708	- && P82403.2 RecName: Full=30S ribosomal protein S6 alpha, chloroplastic; Contains: RecName: Full=30S ribosomal protein S6 beta, chloroplastic; Contains: RecName: Full=30S ribosomal protein S6 gamma, chloroplastic; Contains: RecName: Full=30S ribosomal p	-
HORVU.MOREX.r2.2HG0145460	4.64479	1.56653	12.8669	1.6088	- && O81970.1 RecName: Full=Cytochrome P450 71A9; AltName: Full=Cytochrome P450 CP1 && PF00067:Cytochrome P450	p450
HORVU.MOREX.r2.7HG0587290	9.45293	3.20692	52.1348	6.03778	- && Q94AF0.1 RecName: Full=Pre-mRNA cleavage factor Im 25 kDa subunit 1; AltName: Full=Cleavage and polyadenylation specificity factor 25 kDa subunit; Short=AtCFI-25; Short=CFIm-25; Short=CPSF 25 kDa subunit; AltName: Full=Cleavage and polyadenylation sp	-
novel.903	0.0192381	1.75796	0	1.56824	- && - && -	-
HORVU.MOREX.r2.7HG0572250	94.8719	41.7841	162.227	34.1964	- && Q6ZJ05.1 RecName: Full=Probable uridine nucleosidase 1; AltName: Full=Uridine ribohydrolase 1 && PF01156:Inosine-uridine preferring nucleoside hydrolase	-
HORVU.MOREX.r2.2HG0158210	2.00426	0.521396	5.43082	0.724975	- && - && -	-
novel.880	1.68653	2.39668	0.450533	3.92665	- && - && -	-
HORVU.MOREX.r2.7HG0554640	2.00993	1.98509	0.0570896	2.8088	- && P04784.1 RecName: Full=Chlorophyll a-b binding protein, chloroplastic; AltName: Full=LHCII type I CAB; Short=LHCP; Flags: Precursor && PF00504:Chlorophyll A-B binding protein	-
HORVU.MOREX.r2.7HG0593370	5.23807	2.22062	10.4109	2.15964	- && Q9STT8.2 RecName: Full=ABC transporter A family member 4; Short=ABC transporter ABCA.4; Short=AtABCA4; AltName: Full=Putative ABC2 homolog 3 && PF00005:ABC transporter|PF12698:ABC-2 family transporter protein	ABC_tran
HORVU.MOREX.r2.2HG0154910	2.80875	2.88337	0.722264	3.96555	- && O82752.1 RecName: Full=Protein DETOXIFICATION 49; Short=AtDTX49; AltName: Full=Multidrug and toxic compound extrusion protein 49; Short=MATE protein 49; AltName: Full=Protein NOVEL ION CARRIER 1; Short=Protein NIC1 && PF01554:MatE	MatE
HORVU.MOREX.r2.5HG0422550	24.9752	15.1632	36.1598	10.9051	- && Q940M4.1 RecName: Full=Organic cation/carnitine transporter 7; Short=AtOCT7 && PF00083:Sugar (and other) transporter	Sugar_tr
HORVU.MOREX.r2.1HG0043100	5.52486	9.09678	1.08954	5.29426	- && Q7XCL0.1 RecName: Full=Expansin-like A2; AltName: Full=OsEXLA2; AltName: Full=OsEXPL2; AltName: Full=OsaEXPb2.2; Flags: Precursor && PF01357:Pollen allergen|PF03330:Rare lipoprotein A (RlpA)-like double-psi beta-barrel	-
HORVU.MOREX.r2.3HG0196650	8.29701	4.14148	37.9016	6.42003	- && Q2V9B0.1 RecName: Full=Transcription factor MYB1R1; AltName: Full=Myb-related protein R1; Short=StMYB1R-1 && PF00249:Myb-like DNA-binding domain	Myb_DNA-binding
HORVU.MOREX.r2.2HG0135750	7.77048	3.69636	12.3357	2.55533	- && Q6VVA6.2 RecName: Full=Potassium transporter 1; AltName: Full=OsHAK1 && PF02705:K+ potassium transporter	K_trans
HORVU.MOREX.r2.2HG0100990	1351.87	640.074	2853.94	516.227	- && P08626.1 RecName: Full=Subtilisin-chymotrypsin inhibitor-2B; Short=CI-2B && PF00280:Potato inhibitor I family	-
HORVU.MOREX.r2.7HG0592180	21.9973	12.6344	66.0032	16.0526	- && Q69XM7.1 RecName: Full=GTP-binding nuclear protein Ran-3; Short=OsRan3; AltName: Full=Ras-related nuclear protein 3 >A2YEQ6.2 RecName: Full=GTP-binding nuclear protein Ran-3; Short=OsRan3; AltName: Full=Ras-related nuclear protein 3 && PF00071:Ras fa	Ras
HORVU.MOREX.r2.2HG0145400	0.0403317	4.28955	0	3.67872	- && - && -	-
HORVU.MOREX.r2.4HG0299360	1.48277	8.40571	0.596558	7.21736	- && O65479.2 RecName: Full=Putative cysteine-rich receptor-like protein kinase 20; Short=Cysteine-rich RLK20; Flags: Precursor && PF07714:Protein tyrosine kinase	Pkinase_Tyr
HORVU.MOREX.r2.7HG0598530	2.03034	5.106	0.933657	7.94685	- && - && -	-
HORVU.MOREX.r2.4HG0324090	129.666	230.303	60.886	249.593	- && O50061.2 RecName: Full=50S ribosomal protein L4, chloroplastic; AltName: Full=CL4; AltName: Full=R-protein L4; Flags: Precursor && PF00573:Ribosomal protein L4/L1 family	-
HORVU.MOREX.r2.6HG0454180	15.1875	34.7515	3.1584	23.6107	- && A5H452.1 RecName: Full=Peroxidase 70; AltName: Full=Plasma membrane-bound peroxidase 2b; Short=pmPOX2b; Flags: Precursor && PF00141:Peroxidase	-
HORVU.MOREX.r2.4HG0282260	2.43966	0.587598	12.7503	0.865273	- && - && -	-
HORVU.MOREX.r2.2HG0144240	2.2542	1.02492	12.4209	2.59699	- && Q9FIK0.1 RecName: Full=ATP-dependent 6-phosphofructokinase 2; Short=ATP-PFK 2; Short=Phosphofructokinase 2; AltName: Full=Phosphohexokinase 2 && PF00365:Phosphofructokinase	PFK
HORVU.MOREX.r2.7HG0624010	5.825	0.893183	14.4348	2.12173	- && Q9SX38.2 RecName: Full=Putative disease resistance protein At1g50180 && PF00931:NB-ARC domain	NB-ARC
HORVU.MOREX.r2.6HG0523890	4.93151	1.77787	8.02945	2.22042	- && Q7XBQ9.1 RecName: Full=Disease resistance protein RGA2; AltName: Full=Blight resistance protein RPI; AltName: Full=RGA2-blb && PF13855:Leucine rich repeat|PF00931:NB-ARC domain	NB-ARC
HORVU.MOREX.r2.4HG0298120	32.1575	19.2002	90.7897	35.7512	- && Q9ZW22.2 RecName: Full=Methylsterol monooxygenase 2-1; AltName: Full=Sterol 4-alpha-methyl-oxidase 2; Short=AtSMO2; AltName: Full=Sterol 4-alpha-methyl-oxidase 2-1 && PF04116:Fatty acid hydroxylase superfamily	-
HORVU.MOREX.r2.3HG0234510	0.898858	0.252853	2.96631	0.271888	- && Q40541.1 RecName: Full=Mitogen-activated protein kinase kinase kinase NPK1; AltName: Full=Nicotiana protein kinase 1 && PF00069:Protein kinase domain	Pkinase
novel.1819	0.12381	2.07413	0.0488305	1.43034	- && A1E9K3.1 RecName: Full=Cytochrome f; Flags: Precursor && PF01333:Apocytochrome F, C-terminal	-
HORVU.MOREX.r2.1HG0059820	858.409	1275.62	188.979	651.468	- && - && -	-
HORVU.MOREX.r2.4HG0318130	1.36226	0.0824221	6.71335	0.407436	- && - && PF00170:bZIP transcription factor	bZIP_1
HORVU.MOREX.r2.2HG0092160	51.638	13.7366	112.834	15.0659	- && - && PF06522:NADH-ubiquinone reductase complex 1 MLRQ subunit	-
HORVU.MOREX.r2.3HG0233950	23.4063	21.5858	81.5883	27.498	- && Q9FR44.1 RecName: Full=Phosphoethanolamine N-methyltransferase 1; Short=AtNMT1; Short=PEAMT 1; AltName: Full=Protein XIPOTL 1 && PF08241:Methyltransferase domain|PF13489:Methyltransferase domain	Methyltransf_11
HORVU.MOREX.r2.4HG0338490	44.9215	10.8005	159.418	21.4422	- && - && -	-
HORVU.MOREX.r2.3HG0197460	311.453	610.952	226.841	747.82	- && Q94A08.2 RecName: Full=Probable galactinol--sucrose galactosyltransferase 2; AltName: Full=Protein SEED IMBIBITION 2; AltName: Full=Raffinose synthase 2 && PF05691:Raffinose synthase or seed imbibition protein Sip1	-
novel.977	0.120593	0.791697	0	1.14968	- && - && -	-
HORVU.MOREX.r2.7HG0551540	1.67259	1.74113	9.06176	1.63379	- && Q67X83.1 RecName: Full=26.2 kDa heat shock protein, mitochondrial; Short=OsHsp26.2; Flags: Precursor && PF00011:Hsp20/alpha crystallin family	-
HORVU.MOREX.r2.1HG0050960	281.72	118.366	479.921	82.1419	- && Q6YT98.1 RecName: Full=CASP-like protein 1D1; Short=OsCASPL1D1 && PF04535:Domain of unknown function (DUF588)	-
HORVU.MOREX.r2.3HG0207730	81.3203	38.546	218.179	48.0494	- && E1U332.1 RecName: Full=Isoflavone reductase-like protein; AltName: Full=Pollen allergen Ole e 12.01; AltName: Allergen=Ole e 12.01 && PF05368:NmrA-like family	NmrA
HORVU.MOREX.r2.6HG0478560	0	3.39551	0.0552178	4.37781	- && - && -	-
HORVU.MOREX.r2.UnG0633180	0.788986	6.87629	0.152147	5.54178	- && A1EA45.1 RecName: Full=50S ribosomal protein L14, chloroplastic >A1E9M7.1 RecName: Full=50S ribosomal protein L14, chloroplastic >A8Y9C3.1 RecName: Full=50S ribosomal protein L14, chloroplastic && PF00238:Ribosomal protein L14p/L23e	-
HORVU.MOREX.r2.2HG0081690	65.6249	73.4178	8.52058	35.3177	- && Q69TI0.1 RecName: Full=Putative 12-oxophytodienoate reductase 5; AltName: Full=OPDA-reductase 5; Short=OsOPR5 && PF00724:NADH:flavin oxidoreductase / NADH oxidase family	Oxidored_FMN
novel.1815	0.924345	3.83151	0.367843	5.72099	- && A1E9J0.1 RecName: Full=Photosystem I P700 chlorophyll a apoprotein A2; AltName: Full=PSI-B; AltName: Full=PsaB && PF00223:Photosystem I psaA/psaB protein	-
HORVU.MOREX.r2.7HG0592200	2.67575	1.46805	3.60852	0.446435	- && Q69XM6.1 RecName: Full=Cytochrome P450 734A4 && PF00067:Cytochrome P450	p450
HORVU.MOREX.r2.2HG0127670	0.0603989	2.68852	0.0781392	3.15615	- && Q7H6J0.1 RecName: Full=DNA-directed RNA polymerase subunit alpha; Short=PEP; AltName: Full=Plastid-encoded RNA polymerase subunit alpha; Short=RNA polymerase subunit alpha >Q7H6J1.1 RecName: Full=DNA-directed RNA polymerase subunit alpha; Short=PEP;	RNA_pol_A_bac
HORVU.MOREX.r2.2HG0131100	14.3091	8.29561	33.071	6.29517	- && Q9FLD7.1 RecName: Full=Beta-glucuronosyltransferase GlcAT14A; AltName: Full=GT14 family glucuronic acid transferase 1; Short=AtGlcAT14A && PF02485:Core-2/I-Branching enzyme	-
HORVU.MOREX.r2.6HG0449500	7.03894	3.5872	18.3037	6.15952	- && Q9LMN6.1 RecName: Full=Wall-associated receptor kinase 4; Flags: Precursor && PF00069:Protein kinase domain|PF13947:Wall-associated receptor kinase galacturonan-binding	Pkinase
novel.29	2.01076	0.854961	4.69844	0.82874	- && - && -	-
HORVU.MOREX.r2.4HG0328290	6.76197	3.8426	24.4288	5.79759	- && Q9ZUD9.1 RecName: Full=Probable inactive poly [ADP-ribose] polymerase SRO2; AltName: Full=Protein SIMILAR TO RCD ONE 2 && PF12174:RCD1-SRO-TAF4 (RST) plant domain	-
HORVU.MOREX.r2.2HG0164760	75.6787	16.7692	150.99	27.5768	- && Q94JV4.1 RecName: Full=Protein translation factor SUI1 homolog 2 && PF01253:Translation initiation factor SUI1	SUI1
HORVU.MOREX.r2.1HG0037510	87.9081	22.7115	164.006	42.3204	- && Q8GT20.1 RecName: Full=Benzyl alcohol O-benzoyltransferase; AltName: Full=Benzoyl coenzyme A:benzyl alcohol benzoyl transferase && PF02458:Transferase family	-
HORVU.MOREX.r2.2HG0143350	170.491	317.606	66.1966	333.32	- && O48609.1 RecName: Full=30S ribosomal protein 3, chloroplastic; AltName: Full=Plastid-specific 30S ribosomal protein 3; Short=PSRP-3; Flags: Precursor && PF04839:Plastid and cyanobacterial ribosomal protein (PSRP-3 / Ycf65)	-
HORVU.MOREX.r2.6HG0516180	33.191	53.3522	14.2992	37.038	- && O80397.1 RecName: Full=Mitogen-activated protein kinase kinase 4; Short=AtMKK4; Short=MAP kinase kinase 4 && PF00069:Protein kinase domain	Pkinase
HORVU.MOREX.r2.2HG0091380	2.80766	0.693102	6.16333	1.06517	- && Q9FLJ2.1 RecName: Full=NAC domain-containing protein 100; Short=ANAC100; Short=AtNAC5 && PF02365:No apical meristem (NAM) protein	NAM
HORVU.MOREX.r2.1HG0044470	139.421	154.714	32.6924	107.308	- && Q05085.1 RecName: Full=Protein NRT1/ PTR FAMILY 6.3; Short=AtNPF6.3; AltName: Full=Nitrate transporter 1.1; Short=AtNRT1; AltName: Full=Nitrate/chlorate transporter; AltName: Full=Protein CHLORINA 1 && PF00854:POT family	-
HORVU.MOREX.r2.3HG0253200	6.37855	22.3628	4.13178	17.6333	- && Q9FJD6.1 RecName: Full=Putative respiratory burst oxidase homolog protein H; AltName: Full=NADPH oxidase RBOHH; Short=AtRBOHH && PF08022:FAD-binding domain|PF08414:Respiratory burst NADPH oxidase|PF08030:Ferric reductase NAD binding domain|PF01794:Fe	FAD_binding_8
HORVU.MOREX.r2.4HG0276120	14.9078	8.98887	20.3885	6.55133	- && Q9SRE5.1 RecName: Full=Uncharacterized protein At1g76660 && -	-
novel.659	0	1.03164	0	1.53477	- && - && -	-
novel.123	15.0103	3.21132	63.2406	6.37554	- && - && -	-
HORVU.MOREX.r2.1HG0073630	133.06	36.846	262.347	26.5017	- && - && PF06522:NADH-ubiquinone reductase complex 1 MLRQ subunit	-
HORVU.MOREX.r2.3HG0186300	287.134	158.591	818.079	201.423	- && Q9LIN2.1 RecName: Full=GDSL esterase/lipase At3g26430; AltName: Full=Extracellular lipase At3g26430; Flags: Precursor && PF00657:GDSL-like Lipase/Acylhydrolase	Lipase_GDSL
HORVU.MOREX.r2.4HG0321810	22.3346	7.00587	49.7886	8.54827	- && - && PF13398:Peptidase M50B-like	-
HORVU.MOREX.r2.3HG0229300	2.96955	1.87179	13.4234	3.99153	- && Q5SN75.1 RecName: Full=Probable protein phosphatase 2C 8; Short=OsPP2C08 && PF00481:Protein phosphatase 2C	PP2C
HORVU.MOREX.r2.UnG0628780	2.07088	0.261757	9.05807	0.831993	- && O23791.1 RecName: Full=Fruit bromelain; AltName: Allergen=Ana c 2; Flags: Precursor && PF08246:Cathepsin propeptide inhibitor domain (I29)|PF00112:Papain family cysteine protease	Peptidase_C1
HORVU.MOREX.r2.1HG0062750	5.31473	1.04117	12.273	1.5041	- && - && -	-
HORVU.MOREX.r2.4HG0295390	161.322	84.1457	259.661	48.4832	- && - && -	-
HORVU.MOREX.r2.2HG0091480	116.11	78.7775	153.354	50.4579	- && D2SMN4.1 RecName: Full=NAC transcription factor NAM-B1 && PF02365:No apical meristem (NAM) protein	NAM
HORVU.MOREX.r2.3HG0227720	3334.65	5754.5	1093.83	5927.49	- && P40880.1 RecName: Full=Carbonic anhydrase, chloroplastic; AltName: Full=Carbonate dehydratase; Flags: Precursor && PF00484:Carbonic anhydrase	-
HORVU.MOREX.r2.6HG0526370	37.808	12.0797	42.8038	8.52719	- && D7UPN3.1 RecName: Full=Chitin elicitor receptor kinase 1; Short=OsCERK1; AltName: Full=LysM domain receptor-like kinase 1; Short=LysM RLK1; Short=LysM-containing receptor-like kinase 1; Flags: Precursor && PF07714:Protein tyrosine kinase	Pkinase_Tyr
HORVU.MOREX.r2.1HG0057310	4.0465	3.16216	0.249574	2.80819	- && Q0DHB7.1 RecName: Full=Expansin-A4; AltName: Full=Alpha-expansin-4; AltName: Full=OsEXP4; AltName: Full=OsEXPA4; AltName: Full=OsaEXPa1.22; Flags: Precursor >A2Y5R6.1 RecName: Full=Expansin-A4; AltName: Full=Alpha-expansin-4; AltName: Full=OsEXP4; Al	-
HORVU.MOREX.r2.1HG0065500	8.56363	6.66574	24.3937	8.28064	- && Q9SSM3.1 RecName: Full=Jacalin-related lectin 19 && PF01419:Jacalin-like lectin domain	-
HORVU.MOREX.r2.3HG0260070	7.91036	14.759	3.53955	13.2787	- && Q9P775.1 RecName: Full=Uncharacterized WD repeat-containing protein C17D11.16 && PF00400:WD domain, G-beta repeat	WD40
HORVU.MOREX.r2.1HG0047900	6.12967	2.49462	18.5014	4.37046	- && Q60DX8.1 RecName: Full=Beta-glucosidase 22; Short=Os5bglu22; Flags: Precursor && PF00232:Glycosyl hydrolase family 1	Glyco_hydro_1
HORVU.MOREX.r2.6HG0520350	0	1.72053	0	1.44551	- && - && -	-
HORVU.MOREX.r2.5HG0426470	119.054	185.35	59.7542	201.058	- && Q9XJ27.1 RecName: Full=30S ribosomal protein S9, chloroplastic; Flags: Precursor && PF00380:Ribosomal protein S9/S16	-
HORVU.MOREX.r2.4HG0291710	6.49474	0.732505	10.902	0.89261	- && - && -	-
HORVU.MOREX.r2.7HG0571040	31.1136	8.75043	67.9431	11.9245	- && Q8GT74.1 RecName: Full=NEP1-interacting protein 2; AltName: Full=RING-H2 finger protein ATL25 && PF13639:Ring finger domain	-
HORVU.MOREX.r2.7HG0532570	15.4884	25.5276	8.39035	30.0288	- && Q5VRL3.1 RecName: Full=Superoxide dismutase [Fe] 1, chloroplastic; Flags: Precursor && PF00081:Iron/manganese superoxide dismutases, alpha-hairpin domain|PF02777:Iron/manganese superoxide dismutases, C-terminal domain	-
HORVU.MOREX.r2.7HG0557100	0.539511	0.0587728	2.72188	0.34794	- && O49447.1 RecName: Full=ADP,ATP carrier protein 3, mitochondrial; AltName: Full=ADP/ATP translocase 3; AltName: Full=Adenine nucleotide translocator 3; Short=ANT 3; Flags: Precursor && PF00153:Mitochondrial carrier protein	Mito_carr
HORVU.MOREX.r2.5HG0414050	4.23605	1.28373	13.1379	0.601271	- && - && -	-
HORVU.MOREX.r2.2HG0173360	279.88	55.0437	661.055	79.9701	- && O03982.1 RecName: Full=Heavy metal-associated isoprenylated plant protein 39; Short=AtHIP39; Flags: Precursor && PF00403:Heavy-metal-associated domain	HMA
HORVU.MOREX.r2.2HG0174600	92.5155	18.2413	381.767	40.5164	- && - && PF03168:Late embryogenesis abundant protein	-
HORVU.MOREX.r2.7HG0599790	0.987398	1.83751	0.330093	2.16401	- && O22807.2 RecName: Full=Galactan beta-1,4-galactosyltransferase GALS1; AltName: Full=Beta-1,4-galactan synthase; AltName: Full=Galactan synthase 1 && PF01697:Glycosyltransferase family 92	-
HORVU.MOREX.r2.1HG0011940	14.7695	7.31137	32.717	7.92234	- && Q9ST02.2 RecName: Full=Nicotianamine aminotransferase A; AltName: Full=Nicotianamine aminotransferase III; Short=NAAT-III && PF00155:Aminotransferase class I and II	Aminotran_1_2
HORVU.MOREX.r2.3HG0228970	4.0208	8.45539	3.03262	12.782	- && Q9LFT0.1 RecName: Full=Protein trichome birefringence-like 19 && PF13839:GDSL/SGNH-like Acyl-Esterase family found in Pmr5 and Cas1p|PF14416:PMR5 N terminal Domain	-
HORVU.MOREX.r2.5HG0416200	12.4655	5.31424	26.5869	7.84347	- && Q9C5Y0.2 RecName: Full=Phospholipase D delta; Short=AtPLDdelta; Short=PLD delta && PF00614:Phospholipase D Active site motif|PF00168:C2 domain|PF12357:Phospholipase D C terminal	C2
novel.1017	3.80265	2.38194	4.9552	1.56272	- && - && -	-
HORVU.MOREX.r2.2HG0115310	0	1.10328	0	1.53064	- && - && -	-
HORVU.MOREX.r2.7HG0616250	10.5127	8.23423	1.66566	7.42228	- && Q0DAJ3.2 RecName: Full=WRKY transcription factor WRKY28; Short=OsWRKY28 && PF03106:WRKY DNA -binding domain	WRKY
HORVU.MOREX.r2.UnG0634790	0.417627	7.73241	0.20785	5.97184	- && A1E9N6.1 RecName: Full=30S ribosomal protein S15, chloroplastic && PF00312:Ribosomal protein S15	-
HORVU.MOREX.r2.1HG0059580	632.727	230.17	989.554	177.123	- && - && -	-
HORVU.MOREX.r2.3HG0240680	27.5025	2.82745	113.605	2.94475	- && Q9XG83.1 RecName: Full=Gibberellin 2-beta-dioxygenase; AltName: Full=GA 2-oxidase; AltName: Full=Gibberellin 2-beta-hydroxylase; AltName: Full=Gibberellin 2-oxidase && PF03171:2OG-Fe(II) oxygenase superfamily|PF14226:non-haem dioxygenase in morphine	2OG-FeII_Oxy
HORVU.MOREX.r2.UnG0630320	0.212407	5.84538	0.131073	3.59713	- && A1E9M8.1 RecName: Full=50S ribosomal protein L16, chloroplastic && PF00252:Ribosomal protein L16p/L10e	-
HORVU.MOREX.r2.2HG0176670	0.0426266	3.58331	0.0174552	2.51895	- && Q76LL9.1 RecName: Full=Maturase K; AltName: Full=Intron maturase >Q76LM0.1 RecName: Full=Maturase K; AltName: Full=Intron maturase && PF01824:MatK/TrnK amino terminal region|PF01348:Type II intron maturase	-
HORVU.MOREX.r2.5HG0404510	41.2582	6.53669	89.3049	17.1256	- && Q9LMP1.1 RecName: Full=Wall-associated receptor kinase 2; Flags: Precursor && PF07645:Calcium-binding EGF domain|PF13947:Wall-associated receptor kinase galacturonan-binding|PF00069:Protein kinase domain	Pkinase
HORVU.MOREX.r2.7HG0552300	8.24011	12.1689	3.85875	10.9183	- && - && PF02536:mTERF	-
HORVU.MOREX.r2.6HG0465100	0	3.53935	0	3.22242	- && - && -	-
HORVU.MOREX.r2.7HG0586150	1.26489	0.208971	4.76207	0.219851	- && - && PF05078:Protein of unknown function (DUF679)	-
HORVU.MOREX.r2.2HG0086080	52.1516	96.8341	14.2789	130.214	- && P00871.2 RecName: Full=Ribulose bisphosphate carboxylase small chain PWS4.3, chloroplastic; Short=RuBisCO small subunit PWS4.3; Flags: Precursor && PF00101:Ribulose bisphosphate carboxylase, small chain|PF12338:Ribulose-1,5-bisphosphate carboxylase s	-
HORVU.MOREX.r2.6HG0509110	11.6273	4.7402	33.493	5.18517	- && - && PF05678:VQ motif	-
HORVU.MOREX.r2.2HG0165880	2.648	0.58545	5.30592	0.889916	- && O81906.1 RecName: Full=G-type lectin S-receptor-like serine/threonine-protein kinase B120; Flags: Precursor && PF01453:D-mannose binding lectin|PF00954:S-locus glycoprotein domain|PF08276:PAN-like domain|PF00069:Protein kinase domain	Pkinase
HORVU.MOREX.r2.7HG0562920	17.5954	7.95448	26.8839	7.75868	- && Q9VQB7.1 RecName: Full=EGF domain-specific O-linked N-acetylglucosamine transferase; AltName: Full=Extracellular O-linked N-acetylglucosamine transferase; Flags: Precursor && PF04577:Protein of unknown function (DUF563)	-
HORVU.MOREX.r2.5HG0434150	55.1725	110.261	26.304	138.605	- && Q8W593.1 RecName: Full=Probable lactoylglutathione lyase, chloroplastic; AltName: Full=Glyoxalase I; Flags: Precursor && PF00903:Glyoxalase/Bleomycin resistance protein/Dioxygenase superfamily	Glyoxalase
HORVU.MOREX.r2.1HG0073640	597.95	394.839	1213.12	476.139	- && P42210.1 RecName: Full=Phytepsin; AltName: Full=Aspartic proteinase; Contains: RecName: Full=Phytepsin 32 kDa subunit; Contains: RecName: Full=Phytepsin 29 kDa subunit; Contains: RecName: Full=Phytepsin 16 kDa subunit; Contains: RecName: Full=Phyteps	Asp
HORVU.MOREX.r2.3HG0261280	128.845	209.707	44.5763	196.706	- && Q5JK35.1 RecName: Full=Beta-glucosidase 5; Short=Os1bglu5; Flags: Precursor && PF00232:Glycosyl hydrolase family 1	Glyco_hydro_1
HORVU.MOREX.r2.7HG0587040	0.021344	2.23626	0.0952818	2.48734	- && Q9FMC8.1 RecName: Full=Transcription repressor OFP13; AltName: Full=Ovate family protein 13; Short=AtOFP13 && PF04844:Transcriptional repressor, ovate	-
HORVU.MOREX.r2.5HG0398310	27.178	12.9299	84.8792	11.4806	- && Q69P94.1 RecName: Full=Protein TIFY 10c; Short=OsTIFY10c; AltName: Full=Jasmonate ZIM domain-containing protein 8; Short=OsJAZ8; AltName: Full=OsJAZ7 && PF06200:tify domain|PF09425:Divergent CCT motif	Zim
HORVU.MOREX.r2.3HG0254180	4.60947	12.3249	2.34625	7.85972	- && O74327.1 RecName: Full=Vacuolar amino acid transporter 5 && PF01490:Transmembrane amino acid transporter protein	Aa_trans
HORVU.MOREX.r2.2HG0153340	27.3057	18.6754	50.5423	17.0787	- && Q7XUJ2.2 RecName: Full=Probable metal-nicotianamine transporter YSL9; AltName: Full=Protein YELLOW STRIPE LIKE 9; Short=OsYSL9 && PF03169:OPT oligopeptide transporter protein	OPT
HORVU.MOREX.r2.5HG0412500	0.547243	1.61108	0	2.39625	- && Q9SG96.1 RecName: Full=RING-H2 finger protein ATL72; AltName: Full=RING-type E3 ubiquitin transferase ATL72 && PF13639:Ring finger domain	-
HORVU.MOREX.r2.3HG0270890	34.3827	23.6562	60.9344	26.5337	- && Q6PQJ9.1 RecName: Full=3-oxo-Delta(4,5)-steroid 5-beta-reductase; AltName: Full=Delta(4)-3-oxosteroid 5-beta-reductase; AltName: Full=Delta-4,5-steroid 5-beta-reductase; Short=At5beta-StR; AltName: Full=Progesterone 5-beta-reductase; Short=5beta-POR	-
HORVU.MOREX.r2.3HG0253380	2.63321	1.31551	21.5249	2.65994	- && - && PF02617:ATP-dependent Clp protease adaptor protein ClpS	-
HORVU.MOREX.r2.5HG0431740	1.04971	4.06148	0.258826	1.80704	- && Q8GXR2.2 RecName: Full=Probable polyol transporter 6 && PF00083:Sugar (and other) transporter	Sugar_tr
HORVU.MOREX.r2.7HG0594380	12.8726	30.5228	7.58189	35.6465	- && Q9SZI6.1 RecName: Full=Putative GATA transcription factor 22 && PF00320:GATA zinc finger	GATA
HORVU.MOREX.r2.4HG0277440	11.7485	8.21184	26.4179	7.17906	- && F4I274.1 RecName: Full=Myb family transcription factor PHL8; AltName: Full=Protein PHR1-LIKE 8 && -	-
HORVU.MOREX.r2.5HG0409600	6.11526	1.11788	6.45391	0.630215	- && P14133.1 RecName: Full=L-ascorbate oxidase; Short=ASO; Short=Ascorbase; Flags: Precursor && PF00394:Multicopper oxidase|PF07731:Multicopper oxidase|PF07732:Multicopper oxidase	-
HORVU.MOREX.r2.5HG0412520	0.236433	1.00578	0.304202	1.76038	- && Q6S4P4.2 RecName: Full=Transcription factor RF2b && PF00170:bZIP transcription factor	bZIP_1
HORVU.MOREX.r2.3HG0263370	56.1427	15.8931	101.425	21.8351	- && B4G072.1 RecName: Full=DIMBOA UDP-glucosyltransferase BX9; AltName: Full=2,4-dihydroxy-7-methoxy-2H-1,4-benzoxazin-3(4H)-one 2-D-glucosyltransferase BX9; AltName: Full=Protein BENZOXAZINLESS 9 && PF00201:UDP-glucoronosyl and UDP-glucosyl transferase	UDPGT
novel.217	0.357662	1.52537	0.385061	2.21131	- && - && -	-
novel.424	0	1.40179	0	1.09406	- && - && -	-
HORVU.MOREX.r2.2HG0148940	10.9293	22.5726	6.46993	23.2494	- && - && PF11998:Protein of unknown function (DUF3493)	-
HORVU.MOREX.r2.2HG0133130	20.3256	30.5194	11.2515	36.4608	- && Q9SM43.2 RecName: Full=Violaxanthin de-epoxidase, chloroplastic; Flags: Precursor && PF07137:VDE lipocalin domain	-
HORVU.MOREX.r2.7HG0539970	0.581708	0.017957	1.42637	0	- && Q9LU14.1 RecName: Full=GDSL esterase/lipase APG; AltName: Full=Extracellular lipase APG; Flags: Precursor && PF00657:GDSL-like Lipase/Acylhydrolase	Lipase_GDSL
HORVU.MOREX.r2.1HG0076510	25.6553	6.71082	96.6687	12.8655	- && Q9SVG5.1 RecName: Full=Berberine bridge enzyme-like 18; Short=AtBBE-like 18; Flags: Precursor && PF08031:Berberine and berberine like|PF01565:FAD binding domain	FAD_binding_4
HORVU.MOREX.r2.1HG0041320	7.82428	20.4378	5.5154	24.1174	- && Q93XM7.1 RecName: Full=Mitochondrial carnitine/acylcarnitine carrier-like protein; AltName: Full=Carnitine/acylcarnitine translocase-like protein; Short=CAC-like protein; AltName: Full=Protein A BOUT DE SOUFFLE && PF00153:Mitochondrial carrier protei	Mito_carr
HORVU.MOREX.r2.UnG0635750	0.525189	4.94652	0.0382596	3.84509	- && Q95H53.1 RecName: Full=30S ribosomal protein S11, chloroplastic >A1EA41.1 RecName: Full=30S ribosomal protein S11, chloroplastic >A1E9M3.1 RecName: Full=30S ribosomal protein S11, chloroplastic >A8Y9B9.1 RecName: Full=30S ribosomal protein S11, chlor	-
HORVU.MOREX.r2.2HG0141350	11.6732	20.4929	5.51194	23.7119	- && P23902.1 RecName: Full=3-oxoacyl-[acyl-carrier-protein] synthase I, chloroplastic; AltName: Full=Beta-ketoacyl-ACP synthase I; Short=KAS I; Flags: Precursor && PF00109:Beta-ketoacyl synthase, N-terminal domain|PF02801:Beta-ketoacyl synthase, C-termin	ketoacyl-synt
HORVU.MOREX.r2.2HG0142620	4.98683	11.7437	2.05262	10.8548	- && Q94B71.1 RecName: Full=Protein OBERON 3 && PF16312:Coiled-coil region of Oberon	-
HORVU.MOREX.r2.7HG0547330	301.547	535.179	140.143	499.186	- && P52032.2 RecName: Full=Phospholipid hydroperoxide glutathione peroxidase 1, chloroplastic; Short=PHGPx; Flags: Precursor && PF00255:Glutathione peroxidase	GSHPx
HORVU.MOREX.r2.6HG0509730	5.73599	11.0489	3.10058	13.1098	- && - && PF02536:mTERF	-
HORVU.MOREX.r2.3HG0236130	95.3738	64.3103	191.514	50.9866	- && O65896.1 RecName: Full=Cytidine deaminase 1; Short=At-CDA1 && PF08211:Cytidine and deoxycytidylate deaminase zinc-binding region|PF00383:Cytidine and deoxycytidylate deaminase zinc-binding region	-
HORVU.MOREX.r2.2HG0157940	70.5326	38.9563	132.834	37.8823	- && Q71N54.1 RecName: Full=Lecithin-cholesterol acyltransferase-like 4 && PF02450:Lecithin:cholesterol acyltransferase	-
HORVU.MOREX.r2.2HG0147310	38.4041	54.4657	17.644	56.5178	- && Q680K2.1 RecName: Full=Haloacid dehalogenase-like hydrolase domain-containing protein At4g39970; Flags: Precursor && PF00702:haloacid dehalogenase-like hydrolase	Hydrolase
HORVU.MOREX.r2.1HG0064820	1.38111	0.53422	4.52173	0.636637	- && Q9CAD5.1 RecName: Full=Mitogen-activated protein kinase kinase kinase YODA; AltName: Full=YODA MAPKK kinase && PF00069:Protein kinase domain	Pkinase
HORVU.MOREX.r2.1HG0049830	10.9257	4.20683	23.2767	5.1065	- && - && -	-
HORVU.MOREX.r2.1HG0021810	27.9649	47.4421	21.578	64.2828	- && - && -	-
HORVU.MOREX.r2.3HG0252060	11.0135	5.24703	28.1247	5.36975	- && Q9LK64.1 RecName: Full=ABC transporter C family member 3; Short=ABC transporter ABCC.3; Short=AtABCC3; AltName: Full=ATP-energized glutathione S-conjugate pump 3; AltName: Full=Glutathione S-conjugate-transporting ATPase 3; AltName: Full=Multidrug re	ABC_membrane
HORVU.MOREX.r2.3HG0239750	54.8763	21.4979	67.706	17.5346	- && Q8GU89.1 RecName: Full=ABC transporter G family member 37; Short=OsABCG37; AltName: Full=Pleiotropic drug resistance protein 8; Short=OsPDR8 && PF00005:ABC transporter|PF14510:ABC-transporter extracellular N-terminal|PF01061:ABC-2 type transporter|PF	ABC2_membrane
HORVU.MOREX.r2.4HG0324100	17.8976	9.07309	35.4668	7.66253	- && O04200.1 RecName: Full=Peroxisomal nicotinamide adenine dinucleotide carrier; AltName: Full=Peroxisomal NAD carrier; AltName: Full=Peroxisomal membrane protein 38, (PMP36); Short=AtPMP38; AltName: Full=Protein ABERRANT PEROXISOME MORPHOLOGY 3; AltNam	Mito_carr
HORVU.MOREX.r2.5HG0442260	3.20882	1.08954	9.72711	2.2603	- && Q9LMN7.1 RecName: Full=Wall-associated receptor kinase 5; Flags: Precursor && PF00069:Protein kinase domain|PF13947:Wall-associated receptor kinase galacturonan-binding	Pkinase
HORVU.MOREX.r2.3HG0229280	59.4654	40.6293	102.533	37.4438	- && Q9LV04.1 RecName: Full=Probable plastid-lipid-associated protein 14, chloroplastic; Short=AtPap14; AltName: Full=Fibrillin-11; AltName: Full=OBP3-responsive protein 1; Flags: Precursor && PF00069:Protein kinase domain	Pkinase
HORVU.MOREX.r2.6HG0523770	6.75564	2.30955	8.36961	3.29951	- && - && PF08263:Leucine rich repeat N-terminal domain|PF13855:Leucine rich repeat	LRRNT_2
HORVU.MOREX.r2.3HG0227590	5.89548	3.53822	16.0621	3.42405	- && Q0JKZ0.1 RecName: Full=Cinnamoyl-CoA reductase-like SNL6; AltName: Full=Protein SUPPRESSOR OF NH1-MEDIATED LESION 6 && PF01073:3-beta hydroxysteroid dehydrogenase/isomerase family	-
HORVU.MOREX.r2.5HG0392490	8.52844	3.28976	23.218	2.14031	- && Q9LMA1.1 RecName: Full=Probable flavin-containing monooxygenase 1 && PF00743:Flavin-binding monooxygenase-like	FMO-like
HORVU.MOREX.r2.1HG0074690	16.5523	3.45098	57.4798	3.88778	- && - && PF05678:VQ motif	-
HORVU.MOREX.r2.1HG0068040	1.14903	13.7318	1.61913	10.0351	- && - && -	-
HORVU.MOREX.r2.7HG0545340	0.444315	0.0743408	1.17681	0.0538784	- && - && PF04195:Putative gypsy type transposon	Transposase_28
HORVU.MOREX.r2.6HG0477380	52.7445	112.994	40.5408	128.326	- && - && PF04199:Putative cyclase	-
HORVU.MOREX.r2.7HG0595390	44.6058	21.6802	95.7484	17.8985	- && Q5Z8T3.1 RecName: Full=Probable inositol oxygenase; AltName: Full=Myo-inositol oxygenase; Short=MI oxygenase && PF05153:Myo-inositol oxygenase	-
HORVU.MOREX.r2.7HG0603950	49.3829	87.4326	22.0406	86.432	- && P81748.2 RecName: Full=Macrophage migration inhibitory factor homolog; Short=MIF; AltName: Full=L-dopachrome isomerase; AltName: Full=L-dopachrome tautomerase; AltName: Full=Phenylpyruvate tautomerase [Trichuris trichiura] && PF01187:Macrophage migra	MIF
HORVU.MOREX.r2.5HG0429440	8.80997	1.00325	45.5107	4.56956	- && Q00742.1 RecName: Full=Dehydrin Rab15 && PF00257:Dehydrin	-
HORVU.MOREX.r2.1HG0054180	10.9305	18.9666	5.70497	14.7899	- && Q8GXT3.1 RecName: Full=Transcription factor bHLH123; AltName: Full=Basic helix-loop-helix protein 123; Short=AtbHLH123; Short=bHLH 123; AltName: Full=Transcription factor EN 63; AltName: Full=bHLH transcription factor bHLH123 && -	-
HORVU.MOREX.r2.2HG0159130	10.9781	4.08028	20.7801	4.24521	- && Q940M4.1 RecName: Full=Organic cation/carnitine transporter 7; Short=AtOCT7 && PF00083:Sugar (and other) transporter	Sugar_tr
HORVU.MOREX.r2.2HG0104280	0.321862	1.36134	0.164208	2.26777	- && Q9LT10.1 RecName: Full=Probable carboxylesterase 18; AltName: Full=AtCXE18 && PF07859:alpha/beta hydrolase fold	Abhydrolase_3
HORVU.MOREX.r2.2HG0176610	0.0781488	1.92468	0.0320012	2.43503	- && P0CC87.1 RecName: Full=NAD(P)H-quinone oxidoreductase subunit 2 B, chloroplastic; AltName: Full=NAD(P)H dehydrogenase, subunit 2 B; AltName: Full=NADH-plastoquinone oxidoreductase subunit 2 B >P0CC86.1 RecName: Full=NAD(P)H-quinone oxidoreductase sub	-
HORVU.MOREX.r2.2HG0137070	3.37106	6.33289	0.974398	7.21413	- && P27788.1 RecName: Full=Ferredoxin-3, chloroplastic; AltName: Full=Ferredoxin III; Short=Fd III; Flags: Precursor && PF00111:2Fe-2S iron-sulfur cluster binding domain	Fer2
HORVU.MOREX.r2.7HG0617500	483.328	903.969	223.234	948.112	- && Q9TJN6.1 RecName: Full=30S ribosomal protein S17, chloroplastic; Flags: Precursor && PF00366:Ribosomal protein S17	-
HORVU.MOREX.r2.2HG0176040	138.818	65.9353	161.892	60.7873	- && Q8H191.1 RecName: Full=Probable polyamine oxidase 4; Short=AtPAO4; AltName: Full=Amine oxidase 2 && PF01593:Flavin containing amine oxidoreductase	Amino_oxidase
HORVU.MOREX.r2.5HG0397880	14.7397	5.13828	29.2613	7.43698	- && Q8GXZ3.1 RecName: Full=Serine/threonine-protein kinase At5g01020 && PF07714:Protein tyrosine kinase	Pkinase_Tyr
HORVU.MOREX.r2.4HG0277710	102.089	186.241	43.9667	203.165	- && P83585.1 RecName: Full=Ferredoxin && PF00111:2Fe-2S iron-sulfur cluster binding domain	Fer2
HORVU.MOREX.r2.3HG0207340	77.477	135.497	54.7529	160.38	- && - && -	-
HORVU.MOREX.r2.1HG0060340	3.75019	4.33362	1.20965	6.07206	- && Q9ZUX1.1 RecName: Full=Cytochrome P450 94C1 && PF00067:Cytochrome P450	p450
HORVU.MOREX.r2.4HG0277430	95.9659	50.4278	171.028	48.4423	- && Q84ST4.1 RecName: Full=Chlorophyll(ide) b reductase NOL, chloroplastic; AltName: Full=Protein NON-YELLOW COLORING 1-LIKE; Short=OsNOL; Short=Protein NYC1-LIKE; AltName: Full=Short-chain dehydrogenase/reductase NOL; Flags: Precursor && PF00106:short c	adh_short
HORVU.MOREX.r2.1HG0027530	0.265269	2.16765	0.155887	3.32639	- && - && -	-
HORVU.MOREX.r2.5HG0441010	90.1926	48.7236	207.087	39.6666	- && Q75LJ3.1 RecName: Full=Electron transfer flavoprotein subunit alpha, mitochondrial; Short=Alpha-ETF; Flags: Precursor >A2XNR6.1 RecName: Full=Electron transfer flavoprotein subunit alpha, mitochondrial; Short=Alpha-ETF; Flags: Precursor && PF00766:El	-
HORVU.MOREX.r2.7HG0569420	564.259	1067.09	241.147	1074.76	- && P82411.1 RecName: Full=50S ribosomal protein 6, chloroplastic; AltName: Full=CL25; AltName: Full=Plastid-specific 50S ribosomal protein 6; Short=PSRP-6; Flags: Precursor && -	-
HORVU.MOREX.r2.7HG0593780	52.2122	27.9022	120.643	27.8512	- && - && PF07343:Protein of unknown function (DUF1475)	-
HORVU.MOREX.r2.5HG0410760	83.4931	27.9982	182.403	43.58	- && B7F7K7.1 RecName: Full=Beta-glucosidase 31; Short=Os9bglu31; Flags: Precursor && PF00232:Glycosyl hydrolase family 1	Glyco_hydro_1
HORVU.MOREX.r2.4HG0328580	1.10947	0.316039	5.32691	0.104839	- && Q42831.1 RecName: Full=Non-symbiotic hemoglobin; AltName: Full=HORvu GLB1; AltName: Full=Non-legume hemoglobin && PF00042:Globin	-
HORVU.MOREX.r2.3HG0250370	6.28848	2.59675	15.5864	2.92056	- && Q8S9H7.1 RecName: Full=Transcription factor DIVARICATA && PF00249:Myb-like DNA-binding domain	Myb_DNA-binding
HORVU.MOREX.r2.3HG0191770	139.428	68.0972	346.195	64.7731	- && Q8W1L6.2 RecName: Full=Peroxisomal fatty acid beta-oxidation multifunctional protein; Short=MFP; Includes: RecName: Full=Enoyl-CoA hydratase/3-2-trans-enoyl-CoA isomerase/3-hydroxybutyryl-CoA epimerase; Includes: RecName: Full=3-hydroxyacyl-CoA dehyd	3HCDH_N
HORVU.MOREX.r2.2HG0114820	14.2065	0.130911	12.2563	0.022025	- && Q6Z6M4.1 RecName: Full=Isocitrate lyase; Short=ICL; AltName: Full=Isocitrase; AltName: Full=Isocitratase && PF00463:Isocitrate lyase family	-
HORVU.MOREX.r2.4HG0343790	245.28	553.638	81.6292	501.296	- && Q94JX9.2 RecName: Full=Nascent polypeptide-associated complex subunit alpha-like protein 2; Short=NAC-alpha-like protein 2; AltName: Full=Alpha-NAC-like protein 2 && PF01849:NAC domain	-
HORVU.MOREX.r2.6HG0502090	0.217941	0.0528084	0.453247	0.026744	- && Q8LPK2.3 RecName: Full=ABC transporter B family member 2; Short=ABC transporter ABCB.2; Short=AtABCB2; AltName: Full=Multidrug resistance protein 2; AltName: Full=P-glycoprotein 2; Flags: Precursor && PF00005:ABC transporter|PF00664:ABC transporter t	ABC_membrane
HORVU.MOREX.r2.3HG0250200	102.764	59.9981	198.933	51.0116	- && O04420.2 RecName: Full=Uricase; AltName: Full=Nodulin-35 homolog; AltName: Full=Urate oxidase && PF01014:Uricase	-
HORVU.MOREX.r2.4HG0339550	12.5999	4.60356	16.576	2.62488	- && B9DFU2.1 RecName: Full=Cytochrome P450 711A1; AltName: Full=Protein MORE AXILLARY BRANCHES 1 && PF00067:Cytochrome P450	p450
HORVU.MOREX.r2.4HG0277540	16.72	10.3733	29.8401	10.3414	- && - && PF00635:MSP (Major sperm protein) domain|PF12796:Ankyrin repeats (3 copies)	Motile_Sperm
HORVU.MOREX.r2.7HG0555100	23.3565	3.79061	65.5538	5.96953	- && - && -	-
HORVU.MOREX.r2.7HG0557110	7.32593	3.37468	23.8971	5.8154	- && Q5Z6K9.1 RecName: Full=Potassium transporter 24; AltName: Full=OsHAK24 && PF02705:K+ potassium transporter	K_trans
HORVU.MOREX.r2.5HG0361390	78.3964	26.2401	176.772	31.3543	- && Q9ZS51.1 RecName: Full=Peroxisomal membrane protein PMP22; AltName: Full=22 kDa peroxisomal membrane protein && PF04117:Mpv17 / PMP22 family	Mpv17_PMP22
HORVU.MOREX.r2.4HG0337060	1.78788	5.24417	1.35386	7.97749	- && - && -	-
HORVU.MOREX.r2.5HG0436790	3.54844	1.72633	15.8618	2.69921	- && O80327.1 RecName: Full=Thaumatin-like protein 1; Flags: Precursor && PF00314:Thaumatin family	Thaumatin
HORVU.MOREX.r2.5HG0351760	2.70037	9.23984	2.03983	7.54254	- && P11849.2 RecName: Full=Photosystem II D2 protein; Short=PSII D2 protein; AltName: Full=Photosystem Q(A) protein >A1E9Z3.1 RecName: Full=Photosystem II D2 protein; Short=PSII D2 protein; AltName: Full=Photosystem Q(A) protein && PF00124:Photosynthetic	Photo_RC
HORVU.MOREX.r2.4HG0320720	17.6338	5.68007	52.7833	8.28064	- && Q9U9P7.1 RecName: Full=Cytoplasmic phosphatidylinositol transfer protein 1; AltName: Full=Retinal degeneration B homolog beta; Short=RdgBbeta && PF02121:Phosphatidylinositol transfer protein	IP_trans
novel.1320	0	1.40174	0	0.87654	- && - && -	-
HORVU.MOREX.r2.4HG0299860	3.48904	1.43103	11.346	1.82946	- && - && -	-
HORVU.MOREX.r2.5HG0407340	13.4259	33.2247	5.72354	45.5271	- && Q8H0U5.1 RecName: Full=Protein TIC 62, chloroplastic; AltName: Full=Translocon at the inner envelope membrane of chloroplasts 62; Short=AtTIC62; Flags: Precursor && PF13460:NAD(P)H-binding	-
HORVU.MOREX.r2.UnG0635590	3.44287	0.56262	19.0635	2.27656	- && - && PF08246:Cathepsin propeptide inhibitor domain (I29)	-
HORVU.MOREX.r2.2HG0155180	22.3934	5.42811	37.2447	9.02333	- && Q8VZ48.1 RecName: Full=RHOMBOID-like protein 6, mitochondrial; Short=AtRBL6; Flags: Precursor && PF01694:Rhomboid family	Rhomboid
HORVU.MOREX.r2.5HG0400110	23.3698	37.4112	7.80439	22.6749	- && Q5SMM8.1 RecName: Full=Putrescine hydroxycinnamoyltransferase 1; Short=OsPHT1; AltName: Full=BAHD-like hydroxycinnamoyl transferase HCT3; AltName: Full=Hydroxycinnamoyltransferase 3; Short=OsHCT3 && PF02458:Transferase family	-
HORVU.MOREX.r2.3HG0187790	1.52185	0.310274	2.64916	0.369467	- && F4HQ22.1 RecName: Full=LEAF RUST 10 DISEASE-RESISTANCE LOCUS RECEPTOR-LIKE PROTEIN KINASE-like 2.4; AltName: Full=Probable receptor-like serine/threonine-protein kinase LRK10L-2.4; Flags: Precursor && PF07714:Protein tyrosine kinase	Pkinase_Tyr
HORVU.MOREX.r2.4HG0337020	120.652	60.8776	182.394	60.8583	- && Q8GXZ3.1 RecName: Full=Serine/threonine-protein kinase At5g01020 && PF07714:Protein tyrosine kinase	Pkinase_Tyr
HORVU.MOREX.r2.5HG0370160	5.30153	0.572926	4.8956	0.328427	- && - && PF13966:zinc-binding in reverse transcriptase	-
HORVU.MOREX.r2.3HG0210160	29.4247	27.837	62.0453	22.0922	- && - && PF01764:Lipase (class 3)	Lipase_3
HORVU.MOREX.r2.3HG0214030	147.256	254.964	61.1008	254.283	- && - && -	-
HORVU.MOREX.r2.4HG0326580	2.03808	3.39554	1.03848	4.43544	- && O80327.1 RecName: Full=Thaumatin-like protein 1; Flags: Precursor && PF00314:Thaumatin family	Thaumatin
HORVU.MOREX.r2.4HG0338480	21.7714	5.19556	73.2973	6.89178	- && - && -	-
HORVU.MOREX.r2.6HG0516760	1.65542	0.515501	3.20983	0.658384	- && Q1MX30.1 RecName: Full=Receptor kinase-like protein Xa21; Contains: RecName: Full=Receptor kinase-like protein Xa21, processed; Flags: Precursor && PF00069:Protein kinase domain|PF08263:Leucine rich repeat N-terminal domain|PF13855:Leucine rich repea	Pkinase
HORVU.MOREX.r2.7HG0545750	18.0336	42.434	8.31511	36.6223	- && Q39112.1 RecName: Full=Gibberellin 20 oxidase 3; AltName: Full=GA 20-oxidase 3; AltName: Full=Gibberellin C-20 oxidase 3 && PF14226:non-haem dioxygenase in morphine synthesis N-terminal|PF03171:2OG-Fe(II) oxygenase superfamily	2OG-FeII_Oxy
HORVU.MOREX.r2.1HG0022240	11.0126	25.4226	4.78343	17.1853	- && - && PF04570:zinc-finger of the FCS-type, C2-C2	-
HORVU.MOREX.r2.3HG0226300	4.94091	2.91424	12.8314	3.79978	- && Q8L4X4.1 RecName: Full=Probable GABA transporter 2 && PF01490:Transmembrane amino acid transporter protein	Aa_trans
HORVU.MOREX.r2.7HG0546120	30.8593	21.0178	72.0078	19.1574	- && O65201.2 RecName: Full=Acyl-coenzyme A oxidase 2, peroxisomal; Short=AOX 2; AltName: Full=Long-chain acyl-CoA oxidase; Short=AtCX2; Flags: Precursor && PF00441:Acyl-CoA dehydrogenase, C-terminal domain|PF01756:Acyl-CoA oxidase|PF02770:Acyl-CoA dehydr	-
HORVU.MOREX.r2.3HG0260850	12.7569	3.38669	45.0452	5.38433	- && - && PF00403:Heavy-metal-associated domain	HMA
HORVU.MOREX.r2.1HG0013640	3.57915	0.915931	24.9346	4.40315	- && A7QEU4.2 RecName: Full=Peroxidase 5; Flags: Precursor && PF00141:Peroxidase	-
HORVU.MOREX.r2.6HG0516290	1.94515	0.702535	7.59135	0.698493	- && - && PF00249:Myb-like DNA-binding domain	Myb_DNA-binding
HORVU.MOREX.r2.6HG0522830	305.688	189.243	529.808	156.16	- && Q56WD9.2 RecName: Full=3-ketoacyl-CoA thiolase 2, peroxisomal; AltName: Full=Acetyl-CoA acyltransferase 2; AltName: Full=Beta-ketothiolase 2; AltName: Full=Peroxisomal 3-oxoacyl-CoA thiolase 2; AltName: Full=Peroxisome defective protein 1; Flags: Pre	Thiolase_N
HORVU.MOREX.r2.6HG0524590	112.593	68.9035	238.308	56.0224	- && A2XQV4.1 RecName: Full=Electron transfer flavoprotein subunit beta, mitochondrial; Short=Beta-ETF; Flags: Precursor && PF01012:Electron transfer flavoprotein domain	-
HORVU.MOREX.r2.1HG0053730	224.321	110.231	727.666	92.366	- && - && -	-
HORVU.MOREX.r2.5HG0435430	0.144541	1.60756	0.030609	1.21808	- && - && -	-
HORVU.MOREX.r2.6HG0448620	0.0146688	0	0.772691	0.00440884	- && Q9FZB8.1 RecName: Full=Probable LRR receptor-like serine/threonine-protein kinase At1g51810; Flags: Precursor && PF07714:Protein tyrosine kinase|PF12819:Carbohydrate-binding protein of the ER	Pkinase_Tyr
HORVU.MOREX.r2.2HG0080880	5.85325	1.32459	6.45711	1.04259	- && - && -	-
HORVU.MOREX.r2.4HG0318300	1.0151	0.0255485	5.50455	0.483864	- && Q10MK2.1 RecName: Full=Probable glycosyltransferase 4; Short=OsGT4 >A2XFT5.1 RecName: Full=Probable glycosyltransferase 4 && PF05637:galactosyl transferase GMA12/MNN10 family	-
HORVU.MOREX.r2.6HG0510940	307.595	513.112	178.204	737.501	- && A2Z9B8.1 RecName: Full=Glycine cleavage system H protein, mitochondrial; Flags: Precursor >A3C6G9.1 RecName: Full=Glycine cleavage system H protein, mitochondrial; Flags: Precursor && PF01597:Glycine cleavage H-protein	-
HORVU.MOREX.r2.3HG0195530	9.38513	5.65877	30.8618	8.32795	- && - && PF13855:Leucine rich repeat	-
HORVU.MOREX.r2.2HG0154350	26.3493	11.4286	75.962	13.0171	- && B3SGL0.1 RecName: Full=Beta-carotene 3-hydroxylase, chloroplastic; Short=GenCHYB; Flags: Precursor && PF04116:Fatty acid hydroxylase superfamily	-
HORVU.MOREX.r2.5HG0420400	42.4881	35.6174	113.316	46.795	- && Q9FJ47.1 RecName: Full=Senescence-specific cysteine protease SAG12; AltName: Full=Cysteine proteinase SAG12; AltName: Full=Protein SENESCENCE-ASSOCIATED GENE 12; Flags: Precursor && PF00112:Papain family cysteine protease|PF08246:Cathepsin propeptide	Peptidase_C1
HORVU.MOREX.r2.3HG0212350	19.8969	10.4171	39.6175	12.9967	- && Q3EAQ5.2 RecName: Full=Probable peptide/nitrate transporter At3g43790; AltName: Full=Protein ZINC INDUCED FACILITATOR-LIKE 2 && PF07690:Major Facilitator Superfamily	MFS_1
HORVU.MOREX.r2.5HG0372730	31.239	44.596	19.6354	55.6545	- && - && PF01789:PsbP	-
HORVU.MOREX.r2.6HG0496860	1.27905	0.088043	8.01844	0.901863	- && A2X7U1.2 RecName: Full=Homeobox-leucine zipper protein HOX24; AltName: Full=HD-ZIP protein HOX24; AltName: Full=Homeodomain transcription factor HOX24; AltName: Full=OsHox24 && PF02183:Homeobox associated leucine zipper|PF00046:Homeobox domain	Homeobox
novel.776	166.313	73.2641	694.323	146.345	- && - && -	-
HORVU.MOREX.r2.3HG0249910	18.5915	5.22467	55.2372	7.61469	- && - && -	-
HORVU.MOREX.r2.5HG0408180	9.73432	2.64164	15.9022	3.52192	- && Q9LU41.2 RecName: Full=Calcium-transporting ATPase 9, plasma membrane-type; AltName: Full=Ca(2+)-ATPase isoform 9 && PF12515:Ca2+-ATPase N terminal autoinhibitory domain|PF00689:Cation transporting ATPase, C-terminus|PF00122:E1-E2 ATPase|PF00690:Cati	Cation_ATPase_C
HORVU.MOREX.r2.2HG0105160	21.9808	6.59008	51.4335	10.4807	- && P51110.1 RecName: Full=Dihydroflavonol 4-reductase; Short=DFR; AltName: Full=Dihydrokaempferol 4-reductase; AltName: Full=Flavanone 4-reductase; Short=FNR && PF01370:NAD dependent epimerase/dehydratase family	Epimerase
HORVU.MOREX.r2.4HG0282440	86.5444	21.0409	170.131	26.1815	- && P53844.1 RecName: Full=Phosphatidylinositol transfer protein PDR17; Short=PITP; AltName: Full=Phosphatidylserine transport B pathway protein 2; AltName: Full=Pleiotropic drug resistance protein 17; AltName: Full=SEC14 homolog 3 && PF03765:CRAL/TRIO,	CRAL_TRIO_N
HORVU.MOREX.r2.1HG0037400	70.4861	121.076	32.3908	134.654	- && P81760.2 RecName: Full=Thylakoid lumenal 17.4 kDa protein, chloroplastic; AltName: Full=P17.4; Flags: Precursor && PF13599:Pentapeptide repeats (9 copies)	-
HORVU.MOREX.r2.7HG0553150	2.50459	7.48599	1.52227	7.64054	- && Q9LN01.1 RecName: Full=Pentatricopeptide repeat-containing protein At1g08070, chloroplastic; AltName: Full=Protein ORGANELLE TRANSCRIPT PROCESSING 82; Flags: Precursor && PF14432:DYW family of nucleic acid deaminases|PF12854:PPR repeat|PF13041:PPR re	PPR
HORVU.MOREX.r2.6HG0454900	85.9413	178.256	29.1702	172.466	- && - && -	-
HORVU.MOREX.r2.2HG0158020	47.7969	25.1821	103.373	22.1609	- && Q7XN11.2 RecName: Full=Gamma-aminobutyrate transaminase 1, mitochondrial; Flags: Precursor && PF00202:Aminotransferase class-III	Aminotran_3
HORVU.MOREX.r2.2HG0170060	1.98919	0.15362	5.21702	0.0867331	- && P25776.2 RecName: Full=Oryzain alpha chain; Flags: Precursor && PF00396:Granulin	-
novel.1716	0.0343409	0.730078	0.0706201	0.795737	- && Q7F2E4.1 RecName: Full=DNA excision repair protein CSB; AltName: Full=Cockayne syndrome protein CSB; Short=OsCSB && PF00176:SNF2 family N-terminal domain	SNF2_N
HORVU.MOREX.r2.2HG0165850	1.14316	0.501749	5.60558	0.563687	- && Q9SXB8.3 RecName: Full=G-type lectin S-receptor-like serine/threonine-protein kinase At1g11330; Flags: Precursor && PF07714:Protein tyrosine kinase	Pkinase_Tyr
HORVU.MOREX.r2.2HG0171550	0.126406	0.0263742	1.6465	0.0746037	- && - && PF00646:F-box domain	F-box
HORVU.MOREX.r2.7HG0573050	401.635	646.833	304.409	697.553	- && P93407.1 RecName: Full=Superoxide dismutase [Cu-Zn], chloroplastic; Flags: Precursor && PF00080:Copper/zinc superoxide dismutase (SODC)	-
HORVU.MOREX.r2.7HG0527370	19.3807	5.89705	57.9515	14.3811	- && Q9M345.1 RecName: Full=L-type lectin-domain containing receptor kinase IV.2; Short=Arabidopsis thaliana lectin-receptor kinase a4; Short=AthlecRK-a4; Short=LecRK-IV.2; AltName: Full=Protein SMALL, GLUED-TOGETHER, AND COLLAPSED POLLEN; Flags: Precurso	Pkinase
HORVU.MOREX.r2.3HG0240610	0	2.03223	0	2.49386	- && - && -	-
HORVU.MOREX.r2.1HG0071870	6.14721	0.860963	9.51516	1.337	- && Q93Z27.1 RecName: Full=Probable calcium-binding protein CML45; AltName: Full=Calmodulin-like protein 45 && PF13499:EF-hand domain pair	-
HORVU.MOREX.r2.2HG0153500	82.5194	35.9122	181.41	33.7326	- && Q33E23.1 RecName: Full=Glutamate dehydrogenase 2, mitochondrial; Short=OsGDH2; Flags: Precursor >A2XW22.1 RecName: Full=Glutamate dehydrogenase 2, mitochondrial; Short=OsGDH2; Flags: Precursor && PF02812:Glu/Leu/Phe/Val dehydrogenase, dimerisation do	-
HORVU.MOREX.r2.7HG0586520	6.12039	2.22451	16.6662	2.79297	- && Q93XX5.1 RecName: Full=PI-PLC X domain-containing protein At5g67130; Flags: Precursor && -	-
HORVU.MOREX.r2.3HG0260060	6.09172	5.38477	1.20855	5.96053	- && - && PF14364:Domain of unknown function (DUF4408)	-
HORVU.MOREX.r2.2HG0097090	2.79699	0.893706	5.08969	1.09798	- && - && -	-
HORVU.MOREX.r2.2HG0163690	163.627	231.673	73.1685	207.116	- && P19684.1 RecName: Full=33 kDa ribonucleoprotein, chloroplastic; Flags: Precursor && PF00076:RNA recognition motif. (a.k.a. RRM, RBD, or RNP domain)	RRM_1
HORVU.MOREX.r2.2HG0089250	70.6628	106.609	13.8399	48.2969	- && O80920.1 RecName: Full=Abscisic acid receptor PYL4; AltName: Full=ABI1-binding protein 2; AltName: Full=PYR1-like protein 4; AltName: Full=Regulatory components of ABA receptor 10 && PF10604:Polyketide cyclase / dehydrase and lipid transport	-
HORVU.MOREX.r2.1HG0000640	3.6654	1.09258	6.78708	1.57117	- && Q8VZG8.3 RecName: Full=MDIS1-interacting receptor like kinase 2; Short=AtMIK2; AltName: Full=Probable LRR receptor-like serine/threonine-protein kinase At4g08850; Flags: Precursor && PF13855:Leucine rich repeat|PF00069:Protein kinase domain	Pkinase
HORVU.MOREX.r2.2HG0098550	1.66116	0	1.54729	0	- && Q3ZFI4.1 RecName: Full=Sinapine esterase; Short=BnSCE3; AltName: Full=Lipase 2; Short=BnLIP2; Flags: Precursor && PF00657:GDSL-like Lipase/Acylhydrolase	Lipase_GDSL
HORVU.MOREX.r2.6HG0512060	198.761	318.72	95.5179	340.421	- && Q9SWI6.1 RecName: Full=50S ribosomal protein L29, chloroplastic; AltName: Full=CL29; Flags: Precursor && PF00831:Ribosomal L29 protein	-
HORVU.MOREX.r2.6HG0451220	3.09695	0.369986	4.12433	0.964994	- && Q9LMN7.1 RecName: Full=Wall-associated receptor kinase 5; Flags: Precursor && PF00069:Protein kinase domain|PF13947:Wall-associated receptor kinase galacturonan-binding	Pkinase
HORVU.MOREX.r2.7HG0565320	19.044	21.7072	8.41321	21.7281	- && Q9SZL6.1 RecName: Full=Transcription termination factor MTERF6, chloroplastic/mitochondrial; AltName: Full=Mitochondrial transcription termination factor 6; AltName: Full=Protein PIGMENT DEFECTIVE 191; Flags: Precursor && PF02536:mTERF	-
HORVU.MOREX.r2.2HG0154720	8.38355	4.49839	16.1018	4.55874	- && Q50EK3.1 RecName: Full=Cytochrome P450 704C1; AltName: Full=Cytochrome P450 CYPD [Pinus taeda] && PF00067:Cytochrome P450	p450
HORVU.MOREX.r2.UnG0636170	1.65866	6.40175	0.901033	6.66496	- && A1E9J0.1 RecName: Full=Photosystem I P700 chlorophyll a apoprotein A2; AltName: Full=PSI-B; AltName: Full=PsaB && PF00223:Photosystem I psaA/psaB protein	-
HORVU.MOREX.r2.2HG0145690	0.443132	0.0202461	2.32393	0.103817	- && Q94BN0.1 RecName: Full=BTB/POZ and TAZ domain-containing protein 2; AltName: Full=BTB and TAZ domain protein 2 && PF00651:BTB/POZ domain|PF02135:TAZ zinc finger	BTB
HORVU.MOREX.r2.2HG0160620	50.1125	23.0105	99.671	28.7105	- && Q39219.2 RecName: Full=Ubiquinol oxidase 1a, mitochondrial; AltName: Full=Alternative oxidase 1a; Flags: Precursor && PF01786:Alternative oxidase	AOX
HORVU.MOREX.r2.3HG0259290	79.445	26.7192	162.412	31.8936	- && P0C042.1 RecName: Full=Uncharacterized protein At4g15970 && PF03407:Nucleotide-diphospho-sugar transferase	-
HORVU.MOREX.r2.3HG0195540	6.60777	3.70196	19.7886	6.35665	- && - && PF13855:Leucine rich repeat|PF08263:Leucine rich repeat N-terminal domain	LRRNT_2
HORVU.MOREX.r2.1HG0056650	1.66501	0.752397	5.60679	0.920023	- && A2ZAX5.2 RecName: Full=Protein SCARECROW 1; AltName: Full=OsSCR1 && PF03514:GRAS domain family	GRAS
HORVU.MOREX.r2.5HG0416320	79.468	121.301	41.0413	92.5981	- && Q9FJU9.1 RecName: Full=Glucan endo-1,3-beta-glucosidase 13; AltName: Full=(1->3)-beta-glucan endohydrolase 13; Short=(1->3)-beta-glucanase 13; AltName: Full=Beta-1,3-endoglucanase 13; Short=Beta-1,3-glucanase 13; Flags: Precursor && PF00332:Glycosyl	Glyco_hydro_17
HORVU.MOREX.r2.5HG0437540	16.4986	1.00434	184.496	3.50822	- && Q84TB6.1 RecName: Full=Actin-depolymerizing factor 3; Short=ADF-3; Short=OsADF3 && PF00241:Cofilin/tropomyosin-type actin-binding protein	Cofilin_ADF
novel.691	0.210919	2.54544	0.189999	2.55958	- && - && -	-
HORVU.MOREX.r2.4HG0279630	1.88662	0.965606	2.58003	0	- && P45851.1 RecName: Full=Oxalate oxidase 2; AltName: Full=Germin; Flags: Precursor && PF00190:Cupin	-
HORVU.MOREX.r2.1HG0039310	1.51484	0.745569	3.29296	0.534709	- && Q9SGU9.1 RecName: Full=Methionine gamma-lyase; Short=AtMGL; AltName: Full=L-methioninase && PF01053:Cys/Met metabolism PLP-dependent enzyme	Cys_Met_Meta_PP
novel.519	0.687598	3.1007	0.623974	3.60692	- && - && -	-
novel.1040	7.33808	13.5164	4.16313	12.5657	- && - && -	-
HORVU.MOREX.r2.4HG0344400	5.38337	9.60924	3.51488	16.0231	- && O64495.1 RecName: Full=Subtilisin-like protease SBT1.2; AltName: Full=Cucumisin-like serine protease SDD1; AltName: Full=Protein STOMATAL DENSITY AND DISTRIBUTION 1; AltName: Full=Subtilase subfamily 1 member 2; Short=AtSBT1.2; AltName: Full=Subtilis	Peptidase_S8
HORVU.MOREX.r2.7HG0612240	1.97726	3.49882	0.816824	4.7552	- && Q9ZQ89.2 RecName: Full=Ureide permease 2; Short=AtUPS2 && PF07168:Ureide permease	-
HORVU.MOREX.r2.3HG0186040	2.65979	5.6221	1.73024	7.63392	- && Q3E6Q1.1 RecName: Full=Pentatricopeptide repeat-containing protein At1g11290, chloroplastic; AltName: Full=Protein CHLORORESPIRATORY REDUCTION 22; Flags: Precursor && PF13041:PPR repeat family|PF14432:DYW family of nucleic acid deaminases	-
HORVU.MOREX.r2.1HG0074070	0.0335997	0	2.47386	0.0441274	- && Q9SPG9.1 RecName: Full=Transcription factor MYB24; AltName: Full=Myb-related protein 24; Short=AtMYB24 && PF00249:Myb-like DNA-binding domain	Myb_DNA-binding
HORVU.MOREX.r2.5HG0375570	34.6649	51.2963	17.1509	44.7049	- && Q2QWT4.1 RecName: Full=3'(2'),5'-bisphosphate nucleotidase; AltName: Full=3'(2'),5-bisphosphonucleoside 3'(2')-phosphohydrolase; AltName: Full=DPNPase >P0C5A3.1 RecName: Full=3'(2'),5'-bisphosphate nucleotidase; AltName: Full=3'(2'),5-bisphosphonucle	-
HORVU.MOREX.r2.7HG0535170	9.6471	4.24169	22.7752	5.05706	- && Q9ZVQ6.1 RecName: Full=F-box protein PP2-B10; AltName: Full=Protein PHLOEM PROTEIN 2-LIKE B10; Short=AtPP2-B10 && PF14299:Phloem protein 2	-
HORVU.MOREX.r2.7HG0555110	11.1175	2.11878	18.2137	1.79936	- && - && -	-
HORVU.MOREX.r2.7HG0607660	4.34683	3.07028	7.02122	1.05928	- && Q0DA21.2 RecName: Full=Beta-glucosidase 25; Short=Os6bglu25; Flags: Precursor && PF00232:Glycosyl hydrolase family 1	Glyco_hydro_1
HORVU.MOREX.r2.6HG0483180	3.0904	14.2241	1.72622	9.51991	- && Q5UBY2.1 RecName: Full=Protein FAR1-RELATED SEQUENCE 1 && PF10551:MULE transposase domain	-
HORVU.MOREX.r2.6HG0509510	5.79943	3.68452	9.87513	2.66183	- && Q6MEW4.1 RecName: Full=2,3-bisphosphoglycerate-dependent phosphoglycerate mutase; Short=BPG-dependent PGAM; Short=PGAM; Short=Phosphoglyceromutase; Short=dPGM && PF00300:Histidine phosphatase superfamily (branch 1)	-
HORVU.MOREX.r2.UnG0635610	0.458689	6.90045	0.447599	7.50954	- && A8Y9C7.1 RecName: Full=30S ribosomal protein S19, chloroplastic && PF00203:Ribosomal protein S19	-
HORVU.MOREX.r2.1HG0060140	51.7166	113.435	29.6457	123.124	- && - && PF13432:Tetratricopeptide repeat	-
HORVU.MOREX.r2.5HG0395650	30.0266	18.5229	63.4541	20.786	- && Q6H4R6.1 RecName: Full=Potassium transporter 23; AltName: Full=OsHAK23 && PF02705:K+ potassium transporter	K_trans
HORVU.MOREX.r2.6HG0464870	10.6179	2.75012	30.2385	4.49178	- && Q67UX6.1 RecName: Full=Putative homeobox-leucine zipper protein HOX26; AltName: Full=HD-ZIP protein HOX26; AltName: Full=Homeodomain transcription factor HOX26; AltName: Full=OsHox26 && PF00046:Homeobox domain|PF02183:Homeobox associated leucine zipp	Homeobox
HORVU.MOREX.r2.4HG0335560	140.013	81.759	295.63	76.1499	- && - && -	-
HORVU.MOREX.r2.6HG0499970	2.84542	4.57055	1.87923	5.40567	- && Q9FYJ6.1 RecName: Full=Transcription factor bHLH111; AltName: Full=Basic helix-loop-helix protein 111; Short=AtbHLH111; Short=bHLH 111; AltName: Full=Transcription factor EN 66; AltName: Full=bHLH transcription factor bHLH111 && -	-
HORVU.MOREX.r2.5HG0400720	4.334	1.06571	11.8829	0.593451	- && Q6EPZ0.1 RecName: Full=WRKY transcription factor WRKY62; Short=OsWRKY62; AltName: Full=XA21-binding protein 10 >B8BF91.1 RecName: Full=WRKY transcription factor WRKY62; Short=OsWRKY62; AltName: Full=XA21-binding protein 10 && PF03106:WRKY DNA -bindin	WRKY
HORVU.MOREX.r2.6HG0452260	0.17365	0.0372511	3.33273	0	- && P05621.2 RecName: Full=Histone H2B.2 && PF00125:Core histone H2A/H2B/H3/H4	Histone
HORVU.MOREX.r2.6HG0519820	19.4993	32.7149	9.43417	39.0076	- && - && PF12049:Protein of unknown function (DUF3531)	-
HORVU.MOREX.r2.4HG0319370	4.77036	9.28649	2.63151	10.2911	- && - && -	-
HORVU.MOREX.r2.1HG0067870	30.6159	8.29612	84.1463	11.7386	- && - && PF03168:Late embryogenesis abundant protein	-
HORVU.MOREX.r2.2HG0116320	31.443	20.3169	85.9503	21.7892	- && - && PF04520:Senescence regulator	-
HORVU.MOREX.r2.1HG0055410	9.6533	4.47755	17.1289	4.2863	- && Q65X71.1 RecName: Full=Probable calcium-transporting ATPase 6, plasma membrane-type; AltName: Full=Ca(2+)-ATPase isoform 6 && PF00690:Cation transporter/ATPase, N-terminus|PF00122:E1-E2 ATPase|PF00689:Cation transporting ATPase, C-terminus|PF12710:ha	E1-E2_ATPase
HORVU.MOREX.r2.5HG0404080	1.52193	3.26523	0.501562	4.77208	- && Q6YXH5.1 RecName: Full=Zinc-finger homeodomain protein 1; Short=OsZHD1 && PF04770:ZF-HD protein dimerisation region	ZF-HD_dimer
HORVU.MOREX.r2.7HG0540330	42.0515	64.6762	18.2276	54.1224	- && Q76BW5.1 RecName: Full=Xyloglucan endotransglycosylase/hydrolase protein 8; AltName: Full=End-xyloglucan transferase; AltName: Full=OsXRT5; AltName: Full=OsXTH8; Flags: Precursor && PF06955:Xyloglucan endo-transglycosylase (XET) C-terminus|PF00722:Gl	-
HORVU.MOREX.r2.2HG0093610	0.586252	1.23895	0.165772	1.25954	- && P0C0M3.1 RecName: Full=Probable indole-3-acetic acid-amido synthetase GH3.11; AltName: Full=Auxin-responsive GH3-like protein 11; Short=OsGH3-11 && PF03321:GH3 auxin-responsive promoter	-
HORVU.MOREX.r2.1HG0048110	13.9906	6.10346	16.1621	3.20906	- && Q9C942.1 RecName: Full=Caffeoylshikimate esterase; AltName: Full=Lysophospholipase 2; Short=LysoPL2 && PF12146:Serine aminopeptidase, S33	-
HORVU.MOREX.r2.2HG0079980	80.4263	14.7743	150.143	24.8584	- && - && -	-
HORVU.MOREX.r2.7HG0587690	309.5	498.278	134.51	531.694	- && O80439.1 RecName: Full=30S ribosomal protein S31, chloroplastic; AltName: Full=Plastid-specific 30S ribosomal protein 4; Short=PSRP-4; Flags: Precursor && PF17067:Ribosomal protein S31e	-
HORVU.MOREX.r2.1HG0061430	1.06791	0.180383	2.80623	0.180995	- && - && -	-
HORVU.MOREX.r2.5HG0422720	3.88513	8.93515	1.91016	11.448	- && Q9SJG6.1 RecName: Full=Pentatricopeptide repeat-containing protein At2g42920, chloroplastic; Flags: Precursor && -	-
novel.972	0.392838	0.833732	0.140493	1.51104	- && - && -	-
HORVU.MOREX.r2.2HG0171630	32.5604	98.1003	22.4554	107.663	- && - && -	-
HORVU.MOREX.r2.4HG0320280	3.70493	2.09971	11.8841	1.45438	- && Q39224.1 RecName: Full=Protein SRG1; Short=AtSRG1; AltName: Full=Protein SENESCENCE-RELATED GENE 1 && PF03171:2OG-Fe(II) oxygenase superfamily|PF14226:non-haem dioxygenase in morphine synthesis N-terminal	2OG-FeII_Oxy
HORVU.MOREX.r2.3HG0246490	4.15824	1.0047	4.43018	1.3123	- && O64483.1 RecName: Full=Senescence-induced receptor-like serine/threonine-protein kinase; AltName: Full=FLG22-induced receptor-like kinase 1; Flags: Precursor && PF07714:Protein tyrosine kinase|PF12819:Carbohydrate-binding protein of the ER	Pkinase_Tyr
HORVU.MOREX.r2.5HG0399410	6.97038	1.9454	8.9471	2.06219	- && Q9C5V5.2 RecName: Full=Glutamate receptor 2.8; AltName: Full=Ligand-gated ion channel 2.8; Flags: Precursor && PF00497:Bacterial extracellular solute-binding proteins, family 3|PF01094:Receptor family ligand binding region|PF00060:Ligand-gated ion ch	ANF_receptor
novel.1570	4.31913	2.60031	5.8987	2.0884	- && - && -	-
HORVU.MOREX.r2.6HG0511260	273.054	149.156	677.726	161.571	- && Q8LGG8.2 RecName: Full=Universal stress protein A-like protein && PF00582:Universal stress protein family	Usp
HORVU.MOREX.r2.3HG0261990	8.12977	3.54081	10.9532	2.42199	- && Q2R0L2.1 RecName: Full=Laccase-19; AltName: Full=Benzenediol:oxygen oxidoreductase 19; AltName: Full=Diphenol oxidase 19; AltName: Full=Urishiol oxidase 19; Flags: Precursor && PF07732:Multicopper oxidase|PF00394:Multicopper oxidase|PF07731:Multicopp	-
HORVU.MOREX.r2.4HG0337730	134.578	201.408	56.7057	126.547	- && P42736.2 RecName: Full=Ethylene-responsive transcription factor RAP2-3; AltName: Full=Cadmium-induced protein AS30; AltName: Full=Ethylene response factor 72; Short=ERF72; AltName: Full=Ethylene-responsive element binding protein; Short=AtEBP; AltNam	AP2
novel.34	0.674087	2.89642	0.139473	3.26444	- && A1E9J1.1 RecName: Full=Photosystem I P700 chlorophyll a apoprotein A1; AltName: Full=PSI-A; AltName: Full=PsaA && PF00223:Photosystem I psaA/psaB protein	-
HORVU.MOREX.r2.3HG0275500	33.9825	16.1705	28.4257	7.154	- && - && -	-
HORVU.MOREX.r2.4HG0344750	0.58084	2.96644	0.34315	4.04355	- && Q9FJ82.1 RecName: Full=Dihydrodipicolinate reductase-like protein CRR1, chloroplastic; AltName: Full=4-hydroxy-tetrahydrodipicolinate reductase 3; Short=HTPA reductase 3; AltName: Full=Protein CHLORORESPIRATORY REDUCTION 1; Flags: Precursor && PF0111	DapB_N
HORVU.MOREX.r2.3HG0199050	35.6998	55.5027	22.1301	55.8257	- && Q6AT10.1 RecName: Full=Auxin-responsive protein IAA15; AltName: Full=Indoleacetic acid-induced protein 15 && PF02309:AUX/IAA family	-
HORVU.MOREX.r2.2HG0135180	7.5855	2.6753	36.3581	4.9703	- && A2XSX6.1 RecName: Full=Protein TIFY 9 && PF06200:tify domain|PF09425:Divergent CCT motif	Zim
HORVU.MOREX.r2.1HG0061590	42.5586	29.0742	84.5493	22.174	- && O48556.1 RecName: Full=Soluble inorganic pyrophosphatase; AltName: Full=Pyrophosphate phospho-hydrolase; Short=PPase && PF00719:Inorganic pyrophosphatase	Pyrophosphatase
HORVU.MOREX.r2.1HG0054760	5.06732	9.65925	2.1672	12.4059	- && - && -	-
HORVU.MOREX.r2.2HG0178910	59.1491	88.1423	30.1405	87.1942	- && Q7XSV4.1 RecName: Full=Tubby-like F-box protein 7; Short=OsTLP7; AltName: Full=Tubby-like F-box protein 3; Short=OsTLP3 && PF00646:F-box domain|PF01167:Tub family	Tub
HORVU.MOREX.r2.3HG0232070	303.861	529.933	147.859	549.647	- && Q9ASV6.1 RecName: Full=30S ribosomal protein S20, chloroplastic; Flags: Precursor && PF01649:Ribosomal protein S20	-
HORVU.MOREX.r2.3HG0229630	1.39606	1.44007	10.5077	1.08366	- && P51614.1 RecName: Full=Acidic endochitinase; Flags: Precursor && PF00704:Glycosyl hydrolases family 18	-
HORVU.MOREX.r2.1HG0076840	5.79193	11.8189	4.20021	12.9135	- && Q9SV26.2 RecName: Full=Pentatricopeptide repeat-containing protein At4g01030, mitochondrial; Flags: Precursor && PF14432:DYW family of nucleic acid deaminases|PF13041:PPR repeat family	-
HORVU.MOREX.r2.2HG0152850	0.361319	0	2.61941	0.0520483	- && B7F138.1 RecName: Full=Vacuolar iron transporter homolog 2; AltName: Full=Protein NODULIN-LIKE 2 && PF01988:VIT family	DUF125
novel.885	0.18143	1.42713	0.125793	1.36829	- && - && -	-
HORVU.MOREX.r2.7HG0533020	3.04812	5.53418	2.01976	6.67959	- && - && PF07837:Formiminotransferase domain, N-terminal subdomain	-
HORVU.MOREX.r2.3HG0203880	41.7037	16.8601	83.1816	14.4901	- && Q9SJJ7.1 RecName: Full=RING-H2 finger protein ATL57; AltName: Full=RING-type E3 ubiquitin transferase ATL57 && PF13639:Ring finger domain	-
novel.1421	0	1.40166	0.0190522	2.26609	- && - && -	-
HORVU.MOREX.r2.4HG0339800	3.09131	1.16726	4.82395	0.571319	- && Q0D9V6.1 RecName: Full=Protein STAR1; AltName: Full=ABC transporter ABCI.12; Short=OsABCI12; AltName: Full=ABC transporter I family member 12; AltName: Full=Protein ALUMINUM SENSITIVE 1; AltName: Full=Protein SENSITIVE TO ALUMINUM RHIZOTOXICITY 1 &&	ABC_tran
novel.1321	0.0328456	0.990734	0	1.04524	- && P0CC87.1 RecName: Full=NAD(P)H-quinone oxidoreductase subunit 2 B, chloroplastic; AltName: Full=NAD(P)H dehydrogenase, subunit 2 B; AltName: Full=NADH-plastoquinone oxidoreductase subunit 2 B >P0CC86.1 RecName: Full=NAD(P)H-quinone oxidoreductase sub	-
HORVU.MOREX.r2.3HG0240320	0.407987	0	2.2302	0	- && - && -	-
HORVU.MOREX.r2.2HG0126330	26.7651	10.0059	38.8265	14.2871	- && O23877.1 RecName: Full=Ferredoxin--NADP reductase, embryo isozyme, chloroplastic; Short=FNR; Flags: Precursor && PF00175:Oxidoreductase NAD-binding domain	NAD_binding_1
HORVU.MOREX.r2.3HG0274640	7.74991	1.03898	12.966	2.16049	- && Q9LUC5.1 RecName: Full=Cytochrome P450 72A15 && PF00067:Cytochrome P450	p450
HORVU.MOREX.r2.5HG0439700	105.679	18.9654	195.214	20.1294	- && D9HP26.1 RecName: Full=Cell number regulator 10; AltName: Full=ZmCNR10 && PF04749:PLAC8 family	-
HORVU.MOREX.r2.3HG0235880	5.80631	2.53024	13.218	1.81324	- && - && -	-
HORVU.MOREX.r2.7HG0550180	15.188	8.70807	37.3146	6.81055	- && - && PF13563:2'-5' RNA ligase superfamily	-
HORVU.MOREX.r2.7HG0603220	0.165292	0.203018	1.19312	0.103973	- && Q8LPS2.1 RecName: Full=Protein ACCELERATED CELL DEATH 6 && PF13962:Domain of unknown function|PF12796:Ankyrin repeats (3 copies)	-
HORVU.MOREX.r2.7HG0533390	16.5458	10.5264	29.2663	8.20593	- && O82485.1 RecName: Full=Oligopeptide transporter 7; Short=AtOPT7 && PF03169:OPT oligopeptide transporter protein	OPT
HORVU.MOREX.r2.4HG0331440	3.61056	7.76516	1.71837	7.3662	- && Q42381.1 RecName: Full=Probable N-acetyltransferase HLS1; AltName: Full=Protein CONSTITUTIVE PHOTOMORPHOGENIC 3; AltName: Full=Protein HOOKLESS 1; AltName: Full=Protein UNUSUAL SUGAR RESPONSE 2 && PF00583:Acetyltransferase (GNAT) family	Acetyltransf_1
HORVU.MOREX.r2.7HG0592010	5.23122	2.71357	4.82772	1.20438	- && P17801.2 RecName: Full=Putative receptor protein kinase ZmPK1; Flags: Precursor && PF01453:D-mannose binding lectin|PF00069:Protein kinase domain|PF00954:S-locus glycoprotein domain	Pkinase
HORVU.MOREX.r2.3HG0187960	1.58778	0.678554	3.25087	0.584407	- && F4HQ22.1 RecName: Full=LEAF RUST 10 DISEASE-RESISTANCE LOCUS RECEPTOR-LIKE PROTEIN KINASE-like 2.4; AltName: Full=Probable receptor-like serine/threonine-protein kinase LRK10L-2.4; Flags: Precursor && PF14380:Wall-associated receptor kinase C-termina	Pkinase_Tyr
HORVU.MOREX.r2.2HG0153370	2.52347	1.19698	5.46627	0.732731	- && Q9LTC0.1 RecName: Full=Probable receptor-like protein kinase At5g47070 && PF07714:Protein tyrosine kinase	Pkinase_Tyr
HORVU.MOREX.r2.6HG0516220	3.92995	3.10707	7.70682	2.56449	- && O14162.2 RecName: Full=Putative lipase C4A8.10 && PF05057:Putative serine esterase (DUF676)	-
HORVU.MOREX.r2.2HG0082080	12.7797	7.63589	24.6559	4.72938	- && F8WKW1.1 RecName: Full=7-deoxyloganetin glucosyltransferase; AltName: Full=Genipin glucosyltransferase; AltName: Full=UDP-glucose glucosyltransferase 2; Short=GjUGT2; AltName: Full=UDP-glycosyltransferase 85A24 && PF00201:UDP-glucoronosyl and UDP-glu	UDPGT
HORVU.MOREX.r2.5HG0416170	7.67974	3.09451	17.8078	3.33964	- && Q9SGS5.1 RecName: Full=Uncharacterized protein At1g76070 && -	-
HORVU.MOREX.r2.1HG0050620	1.11392	3.54029	0.799158	5.00192	- && Q9ZT66.1 RecName: Full=Endo-1,3;1,4-beta-D-glucanase; Flags: Precursor && PF01738:Dienelactone hydrolase family	-
HORVU.MOREX.r2.6HG0510290	13.0542	21.8077	7.30833	20.3407	- && Q9H8H3.1 RecName: Full=Methyltransferase-like protein 7A; AltName: Full=Protein AAM-B; Flags: Precursor && PF08241:Methyltransferase domain	Methyltransf_11
HORVU.MOREX.r2.6HG0482340	82.2709	46.5114	179.848	43.4731	- && P12955.3 RecName: Full=Xaa-Pro dipeptidase; Short=X-Pro dipeptidase; AltName: Full=Imidodipeptidase; AltName: Full=Peptidase D; AltName: Full=Proline dipeptidase; Short=Prolidase && PF00557:Metallopeptidase family M24|PF05195:Aminopeptidase P, N-term	Peptidase_M24
HORVU.MOREX.r2.3HG0227180	1030.42	1584.29	579.828	1608.81	- && Q9FWS4.1 RecName: Full=50S ribosomal protein L31, chloroplastic; AltName: Full=CL31; AltName: Full=Protein EMBRYO DEFECTIVE 2184; Flags: Precursor && PF01197:Ribosomal protein L31	-
HORVU.MOREX.r2.2HG0086070	311.171	536.533	101.682	656.814	- && P00871.2 RecName: Full=Ribulose bisphosphate carboxylase small chain PWS4.3, chloroplastic; Short=RuBisCO small subunit PWS4.3; Flags: Precursor && PF12338:Ribulose-1,5-bisphosphate carboxylase small subunit|PF00101:Ribulose bisphosphate carboxylase,	-
HORVU.MOREX.r2.7HG0527900	0.495913	1.99416	0.431698	2.08742	- && - && PF00092:von Willebrand factor type A domain|PF14624:VWA / Hh protein intein-like	VWA
HORVU.MOREX.r2.7HG0553030	13.5066	7.16364	27.3771	7.94789	- && Q8L7F9.1 RecName: Full=Beta-1,3-galactosyltransferase GALT1; AltName: Full=Beta-1,3-galactosyltransferase 15; AltName: Full=Galactosyltransferase 1 && PF01762:Galactosyltransferase|PF00337:Galactoside-binding lectin	Galactosyl_T
HORVU.MOREX.r2.7HG0607170	117.937	39.6188	375.706	60.3586	- && - && PF14368:Probable lipid transfer	-
HORVU.MOREX.r2.7HG0552980	12.3395	4.23121	15.2382	2.99407	- && P92934.1 RecName: Full=Amino acid permease 6; AltName: Full=Amino acid transporter AAP6 && PF01490:Transmembrane amino acid transporter protein	Aa_trans
HORVU.MOREX.r2.2HG0081840	71.8435	21.5824	118.869	20.6189	- && Q7X7X4.2 RecName: Full=Cytochrome P450 99A2 && PF00067:Cytochrome P450	p450
HORVU.MOREX.r2.2HG0153590	53.4283	68.3921	15.6477	42.4661	- && Q7XC35.1 RecName: Full=Cyclin-P4-1; Short=CycP4;1 && PF08613:Cyclin	-
HORVU.MOREX.r2.6HG0464190	5.81851	1.33573	14.3642	2.07793	- && - && -	-
HORVU.MOREX.r2.2HG0176750	0.604242	3.92954	0.270292	3.29425	- && A8Y9G0.1 RecName: Full=DNA-directed RNA polymerase subunit beta; AltName: Full=PEP; AltName: Full=Plastid-encoded RNA polymerase subunit beta; Short=RNA polymerase subunit beta && PF04561:RNA polymerase Rpb2, domain 2	RNA_pol_Rpb2_2
HORVU.MOREX.r2.5HG0352330	22.6139	27.679	14.7588	31.3499	- && Q9SSU8.1 RecName: Full=Phytoene synthase, chloroplastic; Flags: Precursor && PF00494:Squalene/phytoene synthase	-
HORVU.MOREX.r2.2HG0112190	1.4845	0.6276	5.25265	0.375155	- && - && PF08613:Cyclin	-
HORVU.MOREX.r2.2HG0114400	0.160793	4.86899	0.147111	5.34804	- && A1EA56.1 RecName: Full=NAD(P)H-quinone oxidoreductase subunit 5, chloroplastic; AltName: Full=NAD(P)H dehydrogenase subunit 5; AltName: Full=NADH-plastoquinone oxidoreductase subunit 5 && PF00662:NADH-Ubiquinone oxidoreductase (complex I), chain 5 N-	-
HORVU.MOREX.r2.5HG0379280	31.6203	16.0058	55.8287	12.2435	- && Q8GXE9.2 RecName: Full=HVA22-like protein j; Short=AtHVA22j && PF03134:TB2/DP1, HVA22 family	TB2_DP1_HVA22
HORVU.MOREX.r2.1HG0054540	0.0844759	0.96586	0	0.52932	- && Q0WRY5.1 RecName: Full=Serine/threonine-protein kinase CDL1; AltName: Full=Protein CDG1-like 1 && PF07714:Protein tyrosine kinase	Pkinase_Tyr
HORVU.MOREX.r2.2HG0155310	41.5847	63.917	21.4546	74.1721	- && - && -	-
HORVU.MOREX.r2.5HG0371490	37.3361	57.7388	15.1444	68.124	- && Q05024.1 RecName: Full=Protein TRI1 && PF02201:SWIB/MDM2 domain	-
HORVU.MOREX.r2.2HG0161610	57.7361	45.6893	230.445	73.8644	- && Q9SKX5.1 RecName: Full=Probable polyamine oxidase 2; Short=AtPAO2; AltName: Full=Amine oxidase 1 && PF01593:Flavin containing amine oxidoreductase	Amino_oxidase
HORVU.MOREX.r2.1HG0072380	9.44411	2.57264	40.2569	4.6991	- && Q5QLR2.1 RecName: Full=Monothiol glutaredoxin-S5 && PF00462:Glutaredoxin	-
HORVU.MOREX.r2.7HG0619040	30.1105	59.2885	15.6658	60.2628	- && - && PF02620:Uncharacterized ACR, COG1399	-
HORVU.MOREX.r2.3HG0245970	179.7	328.584	79.3693	331.085	- && P82244.1 RecName: Full=50S ribosomal protein L34, chloroplastic; AltName: Full=CL34; Flags: Precursor && PF00468:Ribosomal protein L34	-
HORVU.MOREX.r2.3HG0257820	31.949	20.6205	121.026	31.2417	- && Q56YU0.2 RecName: Full=Aldehyde dehydrogenase family 2 member C4; AltName: Full=ALDH1a; AltName: Full=Protein REDUCED EPIDERMAL FLUORESCENCE 1 && PF00171:Aldehyde dehydrogenase family	Aldedh
HORVU.MOREX.r2.6HG0523550	1.52465	0.767149	3.44561	0.868907	- && - && -	-
HORVU.MOREX.r2.2HG0169820	1.98261	0.342278	1.4215	0.169318	- && Q9LMN7.1 RecName: Full=Wall-associated receptor kinase 5; Flags: Precursor && PF00069:Protein kinase domain|PF13947:Wall-associated receptor kinase galacturonan-binding	Pkinase
HORVU.MOREX.r2.6HG0522310	5357.05	6313.29	1093.55	3095.04	- && Q06398.2 RecName: Full=Probable glutathione S-transferase GSTU6; AltName: Full=28 kDa cold-induced protein && PF14497:Glutathione S-transferase, C-terminal domain|PF02798:Glutathione S-transferase, N-terminal domain	GST_N
HORVU.MOREX.r2.7HG0624030	54.4129	69.6555	13.0698	49.156	- && Q9FZ80.1 RecName: Full=Cytosolic sulfotransferase 17; Short=AtSOT17; AltName: Full=Desulfoglucosinolate sulfotransferase C; Short=AtST5c && PF00685:Sulfotransferase domain	Sulfotransfer_1
HORVU.MOREX.r2.3HG0193000	0.590686	3.62905	0.854924	4.13419	- && - && -	-
HORVU.MOREX.r2.6HG0512670	37.9445	16.5141	108.321	18.8305	- && - && -	-
HORVU.MOREX.r2.2HG0140410	1.23814	0.778133	1.98201	0.582912	- && Q9FIJ6.1 RecName: Full=Serine/threonine-protein kinase-like protein CCR4; AltName: Full=CRINKLY 4-related kinase 1; Short=AtCRK1; AltName: Full=Protein CRINKLY 4 RELATED 4; Short=AtCCR4; Flags: Precursor && PF00069:Protein kinase domain	Pkinase
HORVU.MOREX.r2.2HG0081850	32.3798	9.51552	33.6464	7.06739	- && Q66QH3.1 RecName: Full=Syn-pimara-7,15-diene synthase; AltName: Full=9-beta-pimara-7,15-diene synthase; AltName: Full=Ent-kaurene synthase-like 4; Short=OsKS4; Short=OsKSL4; AltName: Full=OsDTS2 && PF01397:Terpene synthase, N-terminal domain|PF03936:	-
HORVU.MOREX.r2.3HG0252080	16.9697	11.5386	67.8832	30.7911	- && Q5N9N2.1 RecName: Full=Probable protein phosphatase 2C 9; Short=OsPP2C09 && PF00481:Protein phosphatase 2C	PP2C
HORVU.MOREX.r2.5HG0423820	0.594093	6.99513	0.193169	4.03508	- && P09444.1 RecName: Full=Late embryogenesis abundant protein D-34; Short=LEA D-34 && PF04927:Seed maturation protein	-
HORVU.MOREX.r2.7HG0605030	3.46843	0.759216	4.70625	1.10059	- && O64477.1 RecName: Full=G-type lectin S-receptor-like serine/threonine-protein kinase At2g19130; Flags: Precursor && PF00954:S-locus glycoprotein domain|PF00069:Protein kinase domain|PF01453:D-mannose binding lectin|PF08276:PAN-like domain	Pkinase
HORVU.MOREX.r2.1HG0019090	12.8127	7.30968	18.789	5.48116	- && Q68CP4.2 RecName: Full=Heparan-alpha-glucosaminide N-acetyltransferase; AltName: Full=Transmembrane protein 76 && PF07786:Protein of unknown function (DUF1624)	-
HORVU.MOREX.r2.1HG0043650	0.991267	0.460223	5.35727	0.838322	- && - && PF12906:RING-variant domain|PF12428:Protein of unknown function (DUF3675)	-
HORVU.MOREX.r2.4HG0280530	270.414	478.769	107.394	512.932	- && P82163.2 RecName: Full=30S ribosomal protein S13, chloroplastic; Flags: Precursor && PF00416:Ribosomal protein S13/S18	-
HORVU.MOREX.r2.3HG0193480	18.1568	4.6081	40.2657	4.86659	- && O22255.1 RecName: Full=RING-H2 finger protein ATL64; AltName: Full=RING-type E3 ubiquitin transferase ATL64 && PF13639:Ring finger domain	-
HORVU.MOREX.r2.5HG0418820	7.50228	6.15778	19.67	4.2931	- && Q9FKY4.1 RecName: Full=Protein PIN-LIKES 7; AltName: Full=Auxin efflux carrier-like protein 7 && PF03547:Membrane transport protein	-
HORVU.MOREX.r2.2HG0080580	27.0749	5.47166	38.7951	6.01739	- && O04534.1 RecName: Full=Putative L-type lectin-domain containing receptor kinase V.1; Short=Arabidopsis thaliana lectin-receptor kinase b2; Short=AthlecRK-b2; Short=LecRK-V.1; Flags: Precursor && PF00139:Legume lectin domain|PF00069:Protein kinase dom	Pkinase
HORVU.MOREX.r2.4HG0321820	7.21209	4.5788	17.3814	3.21396	- && - && PF09713:Plant protein 1589 of unknown function (A_thal_3526)	-
HORVU.MOREX.r2.4HG0342950	59.307	112.069	29.1389	127.478	- && - && -	-
HORVU.MOREX.r2.3HG0242810	0.778133	0.3139	1.9172	0.194692	- && P54769.1 RecName: Full=Tyrosine/DOPA decarboxylase 2; Includes: RecName: Full=DOPA decarboxylase; Short=DDC; Includes: RecName: Full=Tyrosine decarboxylase [Papaver somniferum] && PF00282:Pyridoxal-dependent decarboxylase conserved domain	-
HORVU.MOREX.r2.3HG0242710	57.8331	11.3312	123.871	16.2956	- && Q9FEQ8.1 RecName: Full=Peroxidase 2; AltName: Full=Plasma membrane-bound peroxidase 2; Short=pmPOX2; Flags: Precursor && PF00141:Peroxidase	-
HORVU.MOREX.r2.6HG0449520	0.485822	0	1.5354	0	- && B8BKP4.1 RecName: Full=Bidirectional sugar transporter SWEET14; Short=OsSWEET14 && PF03083:Sugar efflux transporter for intercellular exchange	-
HORVU.MOREX.r2.6HG0470160	136.943	93.0051	364.379	123.067	- && O48604.1 RecName: Full=4-hydroxyphenylpyruvate dioxygenase; AltName: Full=4-hydroxyphenylpyruvic acid oxidase; Short=4HPPD; Short=HPD; Short=HPPDase && -	-
HORVU.MOREX.r2.4HG0279160	7.06331	11.7468	4.86007	14.3505	- && P94538.2 RecName: Full=Uncharacterized tRNA/rRNA methyltransferase YsgA && PF00588:SpoU rRNA Methylase family	SpoU_methylase
HORVU.MOREX.r2.5HG0420460	28.5492	21.5511	45.4691	20.2381	- && Q653B6.1 RecName: Full=Potassium transporter 18; AltName: Full=OsHAK18 && PF02705:K+ potassium transporter	K_trans
HORVU.MOREX.r2.5HG0422560	121.779	90.3299	428.086	136.074	- && Q940M4.1 RecName: Full=Organic cation/carnitine transporter 7; Short=AtOCT7 && PF00083:Sugar (and other) transporter	Sugar_tr
HORVU.MOREX.r2.2HG0125570	24.3593	12.9757	52.5422	12.6333	- && Q9LH89.1 RecName: Full=Uncharacterized protein At3g28850 && PF00462:Glutaredoxin	-
HORVU.MOREX.r2.3HG0205380	2.64221	5.15471	0.821541	5.10475	- && - && PF03417:Acyl-coenzyme A:6-aminopenicillanic acid acyl-transferase	-
HORVU.MOREX.r2.4HG0327700	0.685253	0.345839	2.09499	0.0690645	- && Q9FG34.1 RecName: Full=Peroxidase 54; Short=Atperox P54; AltName: Full=ATP29a; Flags: Precursor && PF00141:Peroxidase	-
HORVU.MOREX.r2.2HG0176250	12.6061	5.60664	23.3362	5.15393	- && D1MI46.1 RecName: Full=Geraniol 8-hydroxylase; AltName: Full=Cytochrome P450 76B10; AltName: Full=Geraniol 10-hydroxylase; Short=SmG10H && PF00067:Cytochrome P450	p450
HORVU.MOREX.r2.2HG0177000	42.8557	9.32982	101.967	11.8838	- && Q06398.2 RecName: Full=Probable glutathione S-transferase GSTU6; AltName: Full=28 kDa cold-induced protein && PF14497:Glutathione S-transferase, C-terminal domain|PF13417:Glutathione S-transferase, N-terminal domain	-
HORVU.MOREX.r2.1HG0055520	1.53008	0.660818	5.13401	0.861141	- && Q68DV7.1 RecName: Full=E3 ubiquitin-protein ligase RNF43; AltName: Full=RING finger protein 43; Flags: Precursor && PF13639:Ring finger domain	-
HORVU.MOREX.r2.3HG0193590	0.421038	2.28183	0.466609	2.0726	- && P61871.1 RecName: Full=Lipase; AltName: Full=Lipase II; AltName: Full=RNL; AltName: Full=Triacylglycerol lipase; Flags: Precursor >P61872.1 RecName: Full=Lipase; AltName: Full=RDL; AltName: Full=Triacylglycerol lipase; Short=ROL; Flags: Precursor &&	Lipase_3
HORVU.MOREX.r2.4HG0284710	26.9865	11.417	58.6846	12.0103	- && Q5EAF2.1 RecName: Full=Type IV inositol polyphosphate 5-phosphatase 11; Short=At5PTase11 && PF03372:Endonuclease/Exonuclease/phosphatase family	Exo_endo_phos
HORVU.MOREX.r2.4HG0337360	17.4613	8.38435	62.8763	9.25371	- && Q8GRS2.1 RecName: Full=Protein TIFY 11c; Short=OsTIFY11c; AltName: Full=Jasmonate ZIM domain-containing protein 11; Short=OsJAZ11; AltName: Full=OsJAZ2 >A2XD79.1 RecName: Full=Protein TIFY 11c && PF09425:Divergent CCT motif|PF06200:tify domain	Zim
HORVU.MOREX.r2.5HG0435670	1.96452	0.512268	12.7904	0.842694	- && - && -	-
HORVU.MOREX.r2.6HG0497370	241.222	432.257	116.881	421.82	- && Q8W463.1 RecName: Full=50S ribosomal protein L19-1, chloroplastic; Flags: Precursor && PF01245:Ribosomal protein L19	-
HORVU.MOREX.r2.7HG0555290	4.6945	1.37373	7.21089	1.41077	- && Q8L612.1 RecName: Full=MACPF domain-containing protein At1g14780 && PF01823:MAC/Perforin domain	-
HORVU.MOREX.r2.6HG0501860	92.8661	47.8144	154.41	47.3995	- && Q9C5C4.1 RecName: Full=Acetylornithine deacetylase; AltName: Full=N-acetylornithinase; Short=AO; Short=Acetylornithinase; Short=NAO && PF01546:Peptidase family M20/M25/M40|PF07687:Peptidase dimerisation domain	Peptidase_M20
HORVU.MOREX.r2.2HG0081200	0.107276	0	0.674453	0	- && Q43135.3 RecName: Full=Tyrosine N-monooxygenase; AltName: Full=Cytochrome P450 79A1; AltName: Full=Cytochrome P450Tyr && PF00067:Cytochrome P450	p450
HORVU.MOREX.r2.5HG0393770	3.14985	5.03789	1.17047	5.17094	- && Q9M9V6.2 RecName: Full=Isochorismate synthase 2, chloroplastic; Short=AtIcs2; AltName: Full=Isochorismate mutase 2; AltName: Full=menF-like protein 2; Flags: Precursor && PF00425:chorismate binding enzyme	-
HORVU.MOREX.r2.6HG0510910	20.8919	12.4859	74.74	16.9387	- && - && -	-
HORVU.MOREX.r2.2HG0166280	1.37433	0.323913	5.20898	0.789584	- && - && -	-
HORVU.MOREX.r2.7HG0529400	13.8692	2.47785	29.3484	4.07174	- && Q339K6.1 RecName: Full=Laccase-15; AltName: Full=Benzenediol:oxygen oxidoreductase 15; AltName: Full=Diphenol oxidase 15; AltName: Full=Urishiol oxidase 15; Flags: Precursor && PF07732:Multicopper oxidase|PF07731:Multicopper oxidase|PF00394:Multicopp	-
HORVU.MOREX.r2.7HG0607670	446.405	578.14	245.513	513.834	- && P11893.1 RecName: Full=50S ribosomal protein L24, chloroplastic; AltName: Full=CL24; Flags: Precursor && PF00467:KOW motif	KOW
HORVU.MOREX.r2.1HG0069150	2.01704	3.25476	0	3.19908	- && - && -	-
HORVU.MOREX.r2.2HG0116980	175.542	190.436	65.0304	204.407	- && Q6Z4A7.1 RecName: Full=Probable 5'-adenylylsulfate reductase 1, chloroplastic; AltName: Full=Adenosine 5'-phosphosulfate 5'-adenylylsulfate sulfotransferase 1; Short=APS sulfotransferase 1; AltName: Full=Adenosine 5'-phosphosulfate reductase-like 1;	-
HORVU.MOREX.r2.6HG0470090	46.0805	13.2573	97.0364	19.2293	- && Q9LTV3.1 RecName: Full=Auxin-responsive protein SAUR72; AltName: Full=Protein SMALL AUXIN UP RNA 72 && PF02519:Auxin responsive protein	Auxin_inducible
HORVU.MOREX.r2.7HG0611910	7.79989	4.58852	17.0319	5.68016	- && Q9SD62.1 RecName: Full=Putative receptor-like protein kinase At3g47110; Flags: Precursor && PF13855:Leucine rich repeat|PF00069:Protein kinase domain|PF08263:Leucine rich repeat N-terminal domain	Pkinase
HORVU.MOREX.r2.1HG0047000	70.5488	46.0045	131.092	36.4577	- && Q01284.1 RecName: Full=Nitronate monooxygenase; AltName: Full=2-nitropropane dioxygenase; Short=2-NPD; AltName: Full=Nitroalkane oxidase; Flags: Precursor && PF03060:Nitronate monooxygenase	NPD
HORVU.MOREX.r2.5HG0367400	0.410952	1.84225	0.411536	2.40957	- && Q9SX98.1 RecName: Full=Lysine histidine transporter-like 8; AltName: Full=Amino acid transporter-like protein 1 && PF01490:Transmembrane amino acid transporter protein	Aa_trans
HORVU.MOREX.r2.2HG0092830	0	2.62389	0	3.9861	- && - && -	-
HORVU.MOREX.r2.7HG0618620	27.4598	5.42788	39.3891	7.79921	- && A6YIH8.1 RecName: Full=Premnaspirodiene oxygenase; Short=HPO; AltName: Full=Cytochrome P450 71D55 && PF00067:Cytochrome P450	p450
HORVU.MOREX.r2.7HG0598650	87.3072	47.7918	288.076	57.1387	- && Q6ZCR3.1 RecName: Full=Germin-like protein 8-12; Flags: Precursor && PF00190:Cupin	-
HORVU.MOREX.r2.1HG0038700	8.01736	17.1328	2.58051	16.7262	- && Q0IWF3.2 RecName: Full=Aquaporin NIP3-1; AltName: Full=NOD26-like intrinsic protein 3-1; AltName: Full=OsNIP3;1 && PF00230:Major intrinsic protein	-
HORVU.MOREX.r2.7HG0581220	26.9511	14.7743	41.4509	11.9024	- && F4JSE7.1 RecName: Full=Protein ENHANCED DISEASE RESISTANCE 2 && PF07059:Protein of unknown function (DUF1336)	-
HORVU.MOREX.r2.2HG0114080	6.51446	3.8444	13.1506	5.02345	- && Q0D5R2.1 RecName: Full=Cysteine-rich receptor-like protein kinase 10; Short=Cysteine-rich RLK10; Flags: Precursor && PF01657:Salt stress response/antifungal|PF07714:Protein tyrosine kinase	Pkinase_Tyr
HORVU.MOREX.r2.3HG0255940	112.725	59.9815	197.647	61.9597	- && Q9LHT0.1 RecName: Full=Tropinone reductase homolog At5g06060 && PF00106:short chain dehydrogenase	adh_short
HORVU.MOREX.r2.2HG0147250	286.412	61.9815	680.048	105.946	- && Q7Y1Z0.1 RecName: Full=Chitinase 5; AltName: Full=Class IV chitinase a; Short=OsChia4a; AltName: Full=Pathogenesis related (PR)-3 chitinase 5; Flags: Precursor && PF00182:Chitinase class I|PF00187:Chitin recognition protein	-
HORVU.MOREX.r2.5HG0383660	0.747397	0.46847	3.21257	0.569197	- && Q9LD44.1 RecName: Full=NAC transcription factor 56; Short=AtNAC056; AltName: Full=NAC domain-containing protein 2; Short=AtNAC2; AltName: Full=Protein NAC-REGULATED SEED MORPHOLOGY 1 && PF02365:No apical meristem (NAM) protein	NAM
HORVU.MOREX.r2.7HG0590620	1.44889	1.34547	5.04801	1.378	- && Q9ST03.2 RecName: Full=Nicotianamine aminotransferase B && PF00155:Aminotransferase class I and II	Aminotran_1_2
HORVU.MOREX.r2.3HG0247350	12.1601	28.2162	9.38687	29.5139	- && Q9ZVI6.1 RecName: Full=Protein LURP-one-related 8 && PF04525:LURP-one-related	-
novel.1271	0	0.632193	0	0.770576	- && - && -	-
HORVU.MOREX.r2.UnG0624340	0.159177	0.0192581	0.963412	0.0388066	- && Q43135.3 RecName: Full=Tyrosine N-monooxygenase; AltName: Full=Cytochrome P450 79A1; AltName: Full=Cytochrome P450Tyr && PF00067:Cytochrome P450	p450
HORVU.MOREX.r2.6HG0501800	41.8152	78.4138	26.1026	78.3075	- && - && PF00861:Ribosomal L18p/L5e family	-
HORVU.MOREX.r2.7HG0543440	8.60228	4.17692	10.8641	4.54825	- && - && PF01925:Sulfite exporter TauE/SafE	-
HORVU.MOREX.r2.2HG0177640	1.27764	0.30185	2.75576	0.466044	- && Q84TG3.1 RecName: Full=E3 ubiquitin-protein ligase PUB23; AltName: Full=Plant U-box protein 23; AltName: Full=U-box domain-containing protein 23 && PF04564:U-box domain	U-box
HORVU.MOREX.r2.2HG0092760	61.0303	42.8216	122.392	45.9315	- && Q8RWZ3.1 RecName: Full=Probable acyl-CoA dehydrogenase IBR3; AltName: Full=Protein INDOLE-3-BUTYRIC ACID RESPONSE 3 && PF02770:Acyl-CoA dehydrogenase, middle domain|PF02771:Acyl-CoA dehydrogenase, N-terminal domain|PF01636:Phosphotransferase enzyme f	APH
HORVU.MOREX.r2.1HG0051730	11.7086	5.35983	22.7643	7.14161	- && Q9FLD5.1 RecName: Full=AAA-ATPase ASD, mitochondrial; AltName: Full=AAA-ATPase 1; AltName: Full=Protein ATPASE-IN-SEED-DEVELOPMENT && PF00004:ATPase family associated with various cellular activities (AAA)|PF14363:Domain associated at C-terminal with	AAA
HORVU.MOREX.r2.4HG0326890	8.97634	5.10484	14.7501	4.53164	- && Q8RXC8.1 RecName: Full=Receptor-like cytosolic serine/threonine-protein kinase RBK2; AltName: Full=Protein ROP BINDING PROTEIN KINASES 2 && PF00069:Protein kinase domain	Pkinase
HORVU.MOREX.r2.6HG0472730	0.0155276	4.16681	0.0493679	1.84785	- && - && PF03004:Plant transposase (Ptta/En/Spm family)	-
HORVU.MOREX.r2.5HG0368210	25.8004	13.4209	29.6517	10.3789	- && - && -	-
HORVU.MOREX.r2.4HG0294380	28.4946	9.57154	115.124	14.2038	- && Q9SG92.1 RecName: Full=Methylesterase 17; Short=AtMES17; AltName: Full=Methyl indole-3-acetic acid esterase && PF12697:Alpha/beta hydrolase family	-
HORVU.MOREX.r2.7HG0583610	405.167	150.766	699.459	164.548	- && Q9FKS8.1 RecName: Full=Lysine histidine transporter 1 && PF01490:Transmembrane amino acid transporter protein	Aa_trans
HORVU.MOREX.r2.5HG0437150	12.1761	17.4848	5.05873	22.6437	- && P04399.1 RecName: Full=Protein synthesis inhibitor II; AltName: Full=Ribosome-inactivating protein II; AltName: Full=rRNA N-glycosidase && PF00161:Ribosome inactivating protein	-
HORVU.MOREX.r2.1HG0074990	125.465	55.6743	201.871	46.4567	- && - && -	-
HORVU.MOREX.r2.1HG0051720	12.5757	3.42646	28.4107	8.03155	- && Q9FG13.1 RecName: Full=Probable carboxylesterase 15; AltName: Full=AtCXE15 && PF07859:alpha/beta hydrolase fold	Abhydrolase_3
novel.445	0	2.04345	0	0.920491	- && O75175.1 RecName: Full=CCR4-NOT transcription complex subunit 3; AltName: Full=CCR4-associated factor 3; AltName: Full=Leukocyte receptor cluster member 2 && PF04065:Not1 N-terminal domain, CCR4-Not complex component	-
HORVU.MOREX.r2.5HG0368350	338.225	224.456	655.185	195.784	- && - && PF00582:Universal stress protein family	Usp
HORVU.MOREX.r2.5HG0362960	0.621278	0.332754	2.59178	0.236883	- && Q9LSB1.1 RecName: Full=UDP-glucuronate:xylan alpha-glucuronosyltransferase 1; Short=UDP-GlcA:xylan glucuronyltransferase 1; AltName: Full=Glycogenin-like protein 1; AltName: Full=Plant glycogenin-like starch initiation protein 1; AltName: Full=Protei	Glyco_transf_8
HORVU.MOREX.r2.4HG0282010	59.2723	30.1402	87.9467	26.6932	- && Q42521.2 RecName: Full=Glutamate decarboxylase 1; Short=GAD 1 && PF00282:Pyridoxal-dependent decarboxylase conserved domain	-
HORVU.MOREX.r2.7HG0547970	5.05758	0.966826	11.8928	1.31559	- && Q9LFN8.2 RecName: Full=Glutamate receptor 2.6; AltName: Full=Ligand-gated ion channel 2.6; Flags: Precursor && PF00060:Ligand-gated ion channel|PF00497:Bacterial extracellular solute-binding proteins, family 3	Lig_chan
HORVU.MOREX.r2.5HG0405550	14.3202	10.4992	55.3002	10.6868	- && - && -	-
HORVU.MOREX.r2.6HG0520030	35.9148	26.5406	58.1798	22.3618	- && Q8VY63.1 RecName: Full=Mannose-P-dolichol utilization defect 1 protein homolog 2 && PF04193:PQ loop repeat	-
HORVU.MOREX.r2.6HG0460660	69.5838	88.0478	30.3034	82.6907	- && Q9LZP8.1 RecName: Full=bZIP transcription factor 53; Short=AtbZIP53 && PF00170:bZIP transcription factor|PF05655:Pseudomonas avirulence D protein (AvrD)	bZIP_1
HORVU.MOREX.r2.3HG0248580	16.5618	14.3375	43.0267	13.5743	- && Q9LTF6.1 RecName: Full=Putative F-box protein At5g52610 && PF00646:F-box domain	F-box
HORVU.MOREX.r2.6HG0511640	0.563173	0.494097	3.59949	0.454956	- && Q6Z7V2.1 RecName: Full=24.1 kDa heat shock protein, mitochondrial; Short=OsHsp24.1; Flags: Precursor && PF00011:Hsp20/alpha crystallin family	-
HORVU.MOREX.r2.4HG0281770	116.929	70.1316	273.733	81.4008	- && Q9LVJ0.1 RecName: Full=UV-B-induced protein At3g17800, chloroplastic; Flags: Precursor && PF05542:Protein of unknown function (DUF760)	-
HORVU.MOREX.r2.7HG0561660	162.659	104.054	478.802	130.532	- && Q9ZRI8.1 RecName: Full=Formate dehydrogenase, mitochondrial; Short=FDH; AltName: Full=NAD-dependent formate dehydrogenase; Flags: Precursor && PF02826:D-isomer specific 2-hydroxyacid dehydrogenase, NAD binding domain|PF00389:D-isomer specific 2-hydro	2-Hacid_dh_C
HORVU.MOREX.r2.3HG0221490	73.2427	105.205	44.6588	108.246	- && F4I907.1 RecName: Full=Glyoxylate/succinic semialdehyde reductase 2, chloroplastic; Short=AtGLYR2; Short=AtGR2; Short=SSA reductase 2; Flags: Precursor && PF03446:NAD binding domain of 6-phosphogluconate dehydrogenase|PF14833:NAD-binding of NADP-depe	NAD_binding_2
HORVU.MOREX.r2.7HG0614050	9.67089	6.62668	18.1276	6.77492	- && B7FA90.1 RecName: Full=Probable homogentisate phytyltransferase 1, chloroplastic; AltName: Full=Vitamin E pathway gene 2-1 protein; Short=OsVTE2-1; Flags: Precursor && PF01040:UbiA prenyltransferase family	UbiA
HORVU.MOREX.r2.6HG0459280	15.2905	31.7898	5.22361	17.4344	- && P05621.2 RecName: Full=Histone H2B.2 && PF00125:Core histone H2A/H2B/H3/H4	Histone
HORVU.MOREX.r2.1HG0006680	31.5381	19.3075	66.2463	20.8753	- && - && PF07795:Protein of unknown function (DUF1635)	-
novel.1341	0.0464225	1.00747	0	0.595339	- && - && -	-
HORVU.MOREX.r2.2HG0160580	34.5694	8.66931	57.7032	9.6284	- && O23913.1 RecName: Full=Ubiquinol oxidase 1b, mitochondrial; AltName: Full=Alternative oxidase 1b; Flags: Precursor && PF01786:Alternative oxidase	AOX
HORVU.MOREX.r2.4HG0315940	4.68698	2.01659	10.1275	2.32861	- && P98204.1 RecName: Full=Phospholipid-transporting ATPase 1; Short=AtALA1; AltName: Full=Aminophospholipid flippase 1 && PF16212:Phospholipid-translocating P-type ATPase C-terminal|PF12710:haloacid dehalogenase-like hydrolase|PF16209:Phospholipid-trans	E1-E2_ATPase
HORVU.MOREX.r2.2HG0176760	0.617474	4.4395	0.167357	3.59243	- && A8Y9G1.1 RecName: Full=DNA-directed RNA polymerase subunit beta'; AltName: Full=PEP; AltName: Full=Plastid-encoded RNA polymerase subunit beta'; Short=RNA polymerase subunit beta' && -	-
HORVU.MOREX.r2.1HG0044390	3.58929	1.0951	7.99678	1.40982	- && Q9FWQ2.1 RecName: Full=Probable trehalose-phosphate phosphatase 2; Short=OsTPP2; AltName: Full=Trehalose 6-phosphate phosphatase && PF02358:Trehalose-phosphatase	-
HORVU.MOREX.r2.7HG0531280	225.04	379.695	128.726	432.271	- && P21240.3 RecName: Full=Chaperonin 60 subunit beta 1, chloroplastic; Short=CPN-60 beta 1; AltName: Full=60 kDa chaperonin subunit beta 1; AltName: Full=RuBisCO large subunit-binding protein subunit beta, chloroplastic; Flags: Precursor && PF00118:TCP-	-
HORVU.MOREX.r2.1HG0064720	1.63461	0.393321	3.87519	0.385545	- && Q9CAD5.1 RecName: Full=Mitogen-activated protein kinase kinase kinase YODA; AltName: Full=YODA MAPKK kinase && PF00069:Protein kinase domain	Pkinase
HORVU.MOREX.r2.5HG0351980	424.382	191.386	2314.97	352.425	- && P81370.2 RecName: Full=Thaumatin-like protein; AltName: Allergen=Act d 2; Flags: Precursor && PF00314:Thaumatin family	Thaumatin
HORVU.MOREX.r2.1HG0057610	12.8272	28.8609	3.75567	25.6793	- && F4I9E1.1 RecName: Full=Protein NUCLEAR FUSION DEFECTIVE 4 && PF06813:Nodulin-like	-
novel.551	0.0712892	1.70872	0.0263675	1.21754	- && - && -	-
novel.254	0.0597408	1.23866	0.0128724	1.02259	- && - && -	-
novel.749	2.96068	1.38915	3.75757	1.19487	- && - && -	-
HORVU.MOREX.r2.5HG0422470	11.0742	21.7021	3.96669	14.2581	- && - && -	-
HORVU.MOREX.r2.7HG0556720	32.5963	18.2342	38.0323	18.1647	- && Q9M9A8.1 RecName: Full=Aspartyl protease APCB1; AltName: Full=Aspartyl protease cleaving BAG 1 && PF14543:Xylanase inhibitor N-terminal|PF14541:Xylanase inhibitor C-terminal	-
HORVU.MOREX.r2.7HG0593530	33.8362	12.9785	46.4319	9.08548	- && - && PF08263:Leucine rich repeat N-terminal domain	LRRNT_2
HORVU.MOREX.r2.5HG0442900	0.584394	4.8255	0.196637	4.53725	- && A1E9K2.1 RecName: Full=Chloroplast envelope membrane protein && PF03040:CemA family	-
HORVU.MOREX.r2.7HG0612840	196.803	390.925	113.679	411.894	- && Q9SCY2.2 RecName: Full=Peptidyl-prolyl cis-trans isomerase FKBP13, chloroplastic; Short=PPIase FKBP13; AltName: Full=FK506-binding protein 1; AltName: Full=FK506-binding protein 13; Short=AtFKBP13; AltName: Full=Immunophilin FKBP13; AltName: Full=Rot	FKBP_C
HORVU.MOREX.r2.3HG0230030	318.332	542.797	148.636	635.132	- && Q06036.1 RecName: Full=50S ribosomal protein L12-2, chloroplastic; AltName: Full=CL12-2; Flags: Precursor && PF16320:Ribosomal protein L7/L12 dimerisation domain|PF00542:Ribosomal protein L7/L12 C-terminal domain	-
HORVU.MOREX.r2.4HG0276520	1.8091	0.792239	2.88215	0.827668	- && Q8VZG8.3 RecName: Full=MDIS1-interacting receptor like kinase 2; Short=AtMIK2; AltName: Full=Probable LRR receptor-like serine/threonine-protein kinase At4g08850; Flags: Precursor && PF08263:Leucine rich repeat N-terminal domain|PF00069:Protein kinas	Pkinase
HORVU.MOREX.r2.7HG0618650	25.9437	14.2823	40.7412	15.7603	- && Q9FY48.2 RecName: Full=E3 ubiquitin-protein ligase KEG; AltName: Full=Protein KEEP ON GOING; AltName: Full=RING finger protein KEG && PF07714:Protein tyrosine kinase	Pkinase_Tyr
HORVU.MOREX.r2.5HG0411860	0.0304802	1.41729	0.046702	1.03295	- && - && PF02902:Ulp1 protease family, C-terminal catalytic domain	Peptidase_C48
HORVU.MOREX.r2.4HG0285990	84.8242	151.946	48.7586	106.72	- && Q9SZE8.1 RecName: Full=LOB domain-containing protein 39; AltName: Full=ASYMMETRIC LEAVES 2-like protein 41; Short=AS2-like protein 41 && PF03195:Protein of unknown function DUF260	-
HORVU.MOREX.r2.5HG0401230	201.769	107.968	319.783	107.969	- && - && -	-
HORVU.MOREX.r2.5HG0379640	3.56812	2.04684	11.0625	1.98877	- && Q9LZ20.1 RecName: Full=Cationic amino acid transporter 6, chloroplastic; Flags: Precursor && PF13906:C-terminus of AA_permease|PF13520:Amino acid permease	-
HORVU.MOREX.r2.5HG0446810	13.9592	4.68641	20.9441	5.18947	- && Q8W4G6.2 RecName: Full=Cysteine-rich receptor-like protein kinase 15; Short=Cysteine-rich RLK15; Flags: Precursor && PF07714:Protein tyrosine kinase|PF01657:Salt stress response/antifungal	Pkinase_Tyr
HORVU.MOREX.r2.2HG0139340	40.3939	15.3827	129.825	26.1709	- && Q9ZVJ5.2 RecName: Full=Haloacid dehalogenase-like hydrolase domain-containing protein Sgpp; AltName: Full=Subclass I phosphosugar phosphatase; Short=AtSgpp && PF13419:Haloacid dehalogenase-like hydrolase	-
HORVU.MOREX.r2.5HG0385110	2.84302	0.960218	4.58953	0.499197	- && Q9SIY7.1 RecName: Full=PRA1 family protein B2; Short=AtPRA1.B2 && PF03208:PRA1 family protein	-
HORVU.MOREX.r2.6HG0512570	69.4709	44.9913	248.696	83.6797	- && - && -	-
HORVU.MOREX.r2.2HG0176520	0.0274446	2.92237	0	1.62471	- && P0CC23.1 RecName: Full=NAD(P)H-quinone oxidoreductase subunit 2 A, chloroplastic; AltName: Full=NAD(P)H dehydrogenase, subunit 2 A; AltName: Full=NADH-plastoquinone oxidoreductase subunit 2 A >P0CC24.1 RecName: Full=NAD(P)H-quinone oxidoreductase sub	-
HORVU.MOREX.r2.6HG0508040	50.9372	20.8402	157.471	30.233	- && Q84MS3.1 RecName: Full=Probable potassium transporter 16; AltName: Full=OsHAK16 && PF02705:K+ potassium transporter	K_trans
HORVU.MOREX.r2.6HG0451440	1.4677	5.25179	1.01173	5.84009	- && Q0JEF5.1 RecName: Full=Flowering-promoting factor 1-like protein 4; AltName: Full=FPF1-like protein 4 && -	-
HORVU.MOREX.r2.3HG0248560	11.5034	8.5122	16.4481	6.72272	- && O59729.1 RecName: Full=Uncharacterized protein slp1; AltName: Full=SUN-like protein 1; Flags: Precursor && PF07738:Sad1 / UNC-like C-terminal	-
HORVU.MOREX.r2.6HG0457060	10.3553	19.4536	7.37198	25.6437	- && Q8GWA9.1 RecName: Full=Pentatricopeptide repeat-containing protein At2g17033 && -	-
HORVU.MOREX.r2.5HG0415780	3.75808	0.433792	8.84114	0.837403	- && - && -	-
HORVU.MOREX.r2.4HG0344320	1.01599	0	5.03708	0.202929	- && Q9SX24.1 RecName: Full=Protein PLANT CADMIUM RESISTANCE 11; Short=AtPCR11 && PF04749:PLAC8 family	-
HORVU.MOREX.r2.2HG0146490	7.41364	12.8961	5.57448	19.1976	- && - && -	-
HORVU.MOREX.r2.3HG0186920	2.67258	0.924581	7.28225	1.80331	- && O65479.2 RecName: Full=Putative cysteine-rich receptor-like protein kinase 20; Short=Cysteine-rich RLK20; Flags: Precursor && PF01657:Salt stress response/antifungal|PF07714:Protein tyrosine kinase	Pkinase_Tyr
HORVU.MOREX.r2.1HG0000110	254.607	394.423	112.081	412.765	- && O22795.2 RecName: Full=50S ribosomal protein L28, chloroplastic; AltName: Full=CL28; Flags: Precursor && PF00830:Ribosomal L28 family	-
HORVU.MOREX.r2.6HG0505640	33.6152	8.10661	83.0093	15.3343	- && - && -	-
novel.45	0.632962	0.018523	1.3799	0.0113622	- && - && -	-
HORVU.MOREX.r2.7HG0621110	4.40332	5.5298	0.0997799	1.78733	- && Q69XJ4.1 RecName: Full=Heme oxygenase 1, chloroplastic; AltName: Full=Protein PHOTOPERIODIC SENSITIVITY 5; Flags: Precursor && PF01126:Heme oxygenase	-
HORVU.MOREX.r2.5HG0398400	607.911	199.438	850.421	194.248	- && Q9FM19.1 RecName: Full=Hypersensitive-induced response protein 1; Short=AtHIR1 && PF01145:SPFH domain / Band 7 family	-
novel.1602	1.71795	3.4261	1.10411	3.54358	- && - && -	-
HORVU.MOREX.r2.2HG0168470	201.212	141.056	409.706	128.782	- && - && PF00582:Universal stress protein family	Usp
HORVU.MOREX.r2.6HG0492020	14.0679	6.39872	27.7831	9.12626	- && - && -	-
HORVU.MOREX.r2.1HG0015680	19.7578	7.28983	57.5063	17.7541	- && Q8LMI4.1 RecName: Full=Tryptamine hydroxycinnamoyltransferase 2; Short=OsTHT2 && PF02458:Transferase family	-
HORVU.MOREX.r2.1HG0037520	26.2561	8.21906	43.9169	13.3043	- && Q8GT20.1 RecName: Full=Benzyl alcohol O-benzoyltransferase; AltName: Full=Benzoyl coenzyme A:benzyl alcohol benzoyl transferase && PF02458:Transferase family	-
HORVU.MOREX.r2.5HG0415160	38.6294	8.16836	98.5	15.1883	- && P21923.2 RecName: Full=Defensin-like protein 1; AltName: Full=Small protein inhibitor of insect alpha-amylases 1; Short=SI alpha-1 && PF00304:Gamma-thionin family	-
HORVU.MOREX.r2.5HG0430500	5.42535	1.23949	7.56429	0.59563	- && O65857.2 RecName: Full=Probable glutathione S-transferase GSTF1; AltName: Full=GST-I && PF02798:Glutathione S-transferase, N-terminal domain|PF00043:Glutathione S-transferase, C-terminal domain	GST_N
HORVU.MOREX.r2.4HG0284100	67.1722	100.693	37.2778	99.8406	- && - && PF00213:ATP synthase delta (OSCP) subunit	-
HORVU.MOREX.r2.6HG0505150	40.7566	22.2486	75.3261	22.7579	- && Q9ASU1.1 RecName: Full=Diacylglycerol O-acyltransferase 2 && PF03982:Diacylglycerol acyltransferase	-
HORVU.MOREX.r2.2HG0159810	28.1532	13.8029	40.5019	14.9184	- && Q7XNY1.2 RecName: Full=Plant intracellular Ras-group-related LRR protein 1; AltName: Full=Intracellular Ras-group-related LRR protein 1; Short=OsIRL1 && PF13855:Leucine rich repeat	-
HORVU.MOREX.r2.5HG0397420	56.0326	39.6802	94.3733	38.2236	- && Q9SQI8.1 RecName: Full=Dihydrolipoyllysine-residue acetyltransferase component 4 of pyruvate dehydrogenase complex, chloroplastic; AltName: Full=Dihydrolipoamide S-acetyltransferase component 4 of pyruvate dehydrogenase complex; AltName: Full=Pyruvat	Biotin_lipoyl
HORVU.MOREX.r2.1HG0014910	51.1154	28.0349	210.503	30.4995	- && - && -	-
HORVU.MOREX.r2.2HG0086980	1.45496	0	4.27977	0.658316	- && - && PF03478:Protein of unknown function (DUF295)	DUF295
HORVU.MOREX.r2.7HG0603570	1.97136	0.130023	5.4708	0.267523	- && - && -	-
HORVU.MOREX.r2.6HG0471860	14.4962	10.8218	45.8813	14.4777	- && P0DKJ4.1 RecName: Full=Bidirectional sugar transporter SWEET2a; Short=SbSWEET2a && PF03083:Sugar efflux transporter for intercellular exchange	-
HORVU.MOREX.r2.1HG0015020	5.45613	3.60837	14.0031	4.79058	- && Q84TC2.1 RecName: Full=DIBOA-glucoside dioxygenase BX6; AltName: Full=2,4-dihydroxy-1,4-benzoxazin-3-one-glucoside dioxygenase; AltName: Full=2-oxoglutarate-dependent dioxygenase BX6; AltName: Full=Protein BENZOXAZINONE SYNTHESIS 6 && PF03171:2OG-Fe(	2OG-FeII_Oxy
HORVU.MOREX.r2.2HG0102300	123.78	83.9975	252.253	82.3826	- && Q8S8F8.1 RecName: Full=GLABRA2 expression modulator && PF02893:GRAM domain	GRAM
HORVU.MOREX.r2.4HG0294250	8.43144	4.25935	21.8301	6.06372	- && O22925.1 RecName: Full=Vacuolar-sorting receptor 2; Short=AtVSR2; AltName: Full=BP80-like protein c; Short=AtBP80c; AltName: Full=Epidermal growth factor receptor-like protein 4; Short=AtELP4; Flags: Precursor && PF02225:PA domain	-
HORVU.MOREX.r2.6HG0516520	91.3246	55.0083	158.069	54.1367	- && Q8VXY7.1 RecName: Full=Equilibrative nucleotide transporter 1; Short=AtENT1; AltName: Full=Nucleoside transporter ENT1 && PF01733:Nucleoside transporter	-
HORVU.MOREX.r2.2HG0174820	15.6648	31.0327	7.58163	20.9645	- && - && -	-
novel.1359	0	0.491275	0	0.811896	- && - && -	-
HORVU.MOREX.r2.6HG0519560	4.69284	1.64692	14.3027	2.5707	- && Q0J6T3.2 RecName: Full=Probable cinnamyl alcohol dehydrogenase 5; Short=OsCAD5 && PF08240:Alcohol dehydrogenase GroES-like domain|PF00107:Zinc-binding dehydrogenase	ADH_N
HORVU.MOREX.r2.6HG0496910	114.178	30.3687	213.89	29.164	- && Q9ZWT2.1 RecName: Full=Cytochrome B5 isoform D; Short=AtCb5-D; AltName: Full=Cytochrome b5 isoform B; Short=AtCb5-B && PF00173:Cytochrome b5-like Heme/Steroid binding domain	-
HORVU.MOREX.r2.UnG0635390	2.79732	6.93414	0.433806	5.0728	- && - && -	-
HORVU.MOREX.r2.2HG0162580	16.532	12.028	30.3344	10.9016	- && Q7XI14.1 RecName: Full=Probable D-2-hydroxyglutarate dehydrogenase, mitochondrial; Flags: Precursor && PF01565:FAD binding domain|PF02913:FAD linked oxidases, C-terminal domain	FAD_binding_4
HORVU.MOREX.r2.7HG0582010	6.53524	4.27815	18.2985	5.07373	- && Q94BV7.1 RecName: Full=External alternative NAD(P)H-ubiquinone oxidoreductase B2, mitochondrial; AltName: Full=External alternative NADH dehydrogenase NDB2; AltName: Full=NADH:ubiquinone reductase (non-electrogenic) NDB2; Flags: Precursor && PF07992:	Pyr_redox_2
HORVU.MOREX.r2.4HG0337370	29.6901	12.8435	95.0105	18.1125	- && - && PF09425:Divergent CCT motif	-
HORVU.MOREX.r2.5HG0368550	66.936	124.667	34.0548	152.146	- && B7K735.1 RecName: Full=Elongation factor Ts; Short=EF-Ts && PF00575:S1 RNA binding domain|PF00889:Elongation factor TS	S1
HORVU.MOREX.r2.2HG0152840	73.9791	121.009	39.3544	152.639	- && I1K0K6.1 RecName: Full=Elongation factor G-2, chloroplastic; Short=cEF-G 2; Flags: Precursor && PF14492:Elongation Factor G, domain II|PF03144:Elongation factor Tu domain 2|PF03764:Elongation factor G, domain IV|PF00009:Elongation factor Tu GTP bindi	GTP_EFTU
HORVU.MOREX.r2.2HG0097390	1.82074	0.433087	5.04576	1.0143	- && - && -	-
HORVU.MOREX.r2.1HG0042180	47.9314	30.3705	91.7338	29.0692	- && Q6AWX0.1 RecName: Full=D-xylose-proton symporter-like 2 && PF00083:Sugar (and other) transporter	Sugar_tr
HORVU.MOREX.r2.3HG0192380	3243.48	5171.13	852.139	3546.92	- && Q03200.1 RecName: Full=Light-regulated protein; Flags: Precursor && PF07207:Light regulated protein Lir1	-
novel.1500	23.0229	7.18032	46.2735	9.46887	- && - && -	-
HORVU.MOREX.r2.5HG0351970	9.46695	7.01684	33.1947	9.23964	- && P31110.1 RecName: Full=Thaumatin-like protein; Flags: Precursor && PF00314:Thaumatin family	Thaumatin
HORVU.MOREX.r2.6HG0452610	60.7634	36.1389	94.9094	29.7185	- && Q9SAV3.1 RecName: Full=2-oxoisovalerate dehydrogenase subunit beta 1, mitochondrial; AltName: Full=Branched-chain alpha-keto acid dehydrogenase E1 component beta chain; Short=BCKDE1B; Short=BCKDH E1-beta; Flags: Precursor && PF02779:Transketolase, py	-
HORVU.MOREX.r2.4HG0280770	49.0202	26.3257	102.094	25.8459	- && Q10E49.1 RecName: Full=Phytanoyl-CoA dioxygenase 1; AltName: Full=Phytanoyl-CoA 2-hydroxylase && PF05721:Phytanoyl-CoA dioxygenase (PhyH)	PhyH
HORVU.MOREX.r2.6HG0521010	4.86192	3.5436	7.08439	2.23281	- && Q9LMN6.1 RecName: Full=Wall-associated receptor kinase 4; Flags: Precursor && PF13947:Wall-associated receptor kinase galacturonan-binding	-
HORVU.MOREX.r2.6HG0509740	5.07592	0.0949961	17.616	0.130968	- && Q6Z8L2.1 RecName: Full=Putative laccase-9; AltName: Full=Benzenediol:oxygen oxidoreductase 9; AltName: Full=Diphenol oxidase 9; AltName: Full=Urishiol oxidase 9; Flags: Precursor && PF00394:Multicopper oxidase|PF07731:Multicopper oxidase|PF07732:Mult	-
HORVU.MOREX.r2.1HG0017110	77.6304	158.514	33.925	238.254	- && P24102.2 RecName: Full=Peroxidase 22; Short=Atperox P22; AltName: Full=ATPEa; AltName: Full=Basic peroxidase E; Flags: Precursor && PF00141:Peroxidase	-
HORVU.MOREX.r2.6HG0525590	81.1425	169.453	44.6701	218.351	- && Q69SV0.2 RecName: Full=Probable L-ascorbate peroxidase 8, chloroplastic; AltName: Full=OsAPx08; Flags: Precursor && PF00141:Peroxidase	-
HORVU.MOREX.r2.3HG0235210	0.316418	0	1.74085	0	- && - && -	-
HORVU.MOREX.r2.2HG0142700	27.65	15.0963	51.8746	20.2827	- && Q93Y91.1 RecName: Full=Sugar transport protein 5; AltName: Full=Hexose transporter 5 && PF00083:Sugar (and other) transporter	Sugar_tr
HORVU.MOREX.r2.7HG0560040	17.8741	10.7257	33.7333	10.7727	- && Q9MAU5.1 RecName: Full=Putative BPI/LBP family protein At1g04970; Flags: Precursor && PF02886:LBP / BPI / CETP family, C-terminal domain|PF01273:LBP / BPI / CETP family, N-terminal domain	-
HORVU.MOREX.r2.6HG0513950	0.370894	0	1.45365	0.0533102	- && Q6Z310.2 RecName: Full=Putative mannan endo-1,4-beta-mannosidase 9; AltName: Full=Beta-mannanase 9; AltName: Full=Endo-beta-1,4-mannanase 9; AltName: Full=OsMANP; AltName: Full=OsMan9; Flags: Precursor && PF00150:Cellulase (glycosyl hydrolase family	-
HORVU.MOREX.r2.5HG0422080	49.7382	31.1799	97.0472	27.3927	- && Q10G56.1 RecName: Full=Ornithine aminotransferase, mitochondrial; AltName: Full=Ornithine delta-aminotransferase; AltName: Full=Ornithine--oxo-acid aminotransferase; Flags: Precursor && PF00202:Aminotransferase class-III	Aminotran_3
HORVU.MOREX.r2.3HG0195630	7.48445	4.65716	29.0619	7.27149	- && O80939.1 RecName: Full=L-type lectin-domain containing receptor kinase IV.1; Short=Arabidopsis thaliana lectin-receptor kinase e; Short=AthlecRK-e; Short=LecRK-IV.1; AltName: Full=Lectin Receptor Kinase 1; Flags: Precursor && PF00139:Legume lectin do	Pkinase
HORVU.MOREX.r2.4HG0332780	4.19706	1.33958	32.9125	0.316663	- && Q6VMN7.1 RecName: Full=Aminotransferase ALD1 homolog && PF00155:Aminotransferase class I and II	Aminotran_1_2
HORVU.MOREX.r2.2HG0132540	0.694611	0.465889	2.69819	0.624222	- && P98205.1 RecName: Full=Phospholipid-transporting ATPase 2; Short=AtALA2; AltName: Full=Aminophospholipid ATPase 2; AltName: Full=Aminophospholipid flippase 2 && PF16212:Phospholipid-translocating P-type ATPase C-terminal|PF12710:haloacid dehalogenase	E1-E2_ATPase
HORVU.MOREX.r2.5HG0447640	10.7503	18.2391	4.84207	18.0652	- && F4I933.1 RecName: Full=Rhodanese-like domain-containing protein 8, chloroplastic; AltName: Full=Sulfurtransferase 8; Short=AtStr8; Flags: Precursor && PF00581:Rhodanese-like domain|PF12368:Rhodanase C-terminal	Rhodanese
HORVU.MOREX.r2.3HG0251460	12.2973	11.8297	1.78622	8.43707	- && Q8S9H7.1 RecName: Full=Transcription factor DIVARICATA && PF00249:Myb-like DNA-binding domain	Myb_DNA-binding
HORVU.MOREX.r2.3HG0260050	321.423	501.361	146.762	507.921	- && O65037.1 RecName: Full=50S ribosomal protein L27, chloroplastic; AltName: Full=CL27; Flags: Precursor && PF01016:Ribosomal L27 protein	-
HORVU.MOREX.r2.5HG0396740	49.5907	20.1559	50.5654	21.9023	- && Q6ERE5.2 RecName: Full=Vacuolar iron transporter 1.2; Short=OsVIT1.2 && PF01988:VIT family	DUF125
HORVU.MOREX.r2.3HG0206440	15.8095	27.1964	7.00492	31.7143	- && Q8GZ63.2 RecName: Full=Pentatricopeptide repeat-containing protein At5g25630 && PF13041:PPR repeat family	-
HORVU.MOREX.r2.6HG0496410	48.2833	98.8977	41.5352	110.498	- && Q8H1Q1.1 RecName: Full=Thylakoid lumenal protein TL20.3, chloroplastic; Flags: Precursor && PF13599:Pentapeptide repeats (9 copies)	-
HORVU.MOREX.r2.6HG0508260	1.01067	0.168913	2.43419	0.30229	- && Q9FKL6.1 RecName: Full=Calmodulin-binding protein 60 B && PF07887:Calmodulin binding protein-like	-
HORVU.MOREX.r2.6HG0509680	569.925	854.866	335.742	1001.78	- && Q07300.1 RecName: Full=ATP synthase delta chain, chloroplastic; AltName: Full=F-ATPase delta chain; Flags: Precursor && PF00213:ATP synthase delta (OSCP) subunit	-
HORVU.MOREX.r2.2HG0082730	2.07818	5.46966	1.79042	7.68298	- && Q84MB3.1 RecName: Full=1-aminocyclopropane-1-carboxylate oxidase homolog 1 && PF03171:2OG-Fe(II) oxygenase superfamily|PF14226:non-haem dioxygenase in morphine synthesis N-terminal	2OG-FeII_Oxy
HORVU.MOREX.r2.3HG0183910	3.93545	1.17151	7.23487	1.15786	- && Q06398.2 RecName: Full=Probable glutathione S-transferase GSTU6; AltName: Full=28 kDa cold-induced protein && PF13417:Glutathione S-transferase, N-terminal domain	-
HORVU.MOREX.r2.1HG0041280	117.165	71.0548	175.075	58.1056	- && Q9ZVJ2.1 RecName: Full=Uncharacterized protein At2g38710 && PF01871:AMMECR1	-
HORVU.MOREX.r2.4HG0341380	11.4182	6.81393	20.594	5.70321	- && Q10S72.1 RecName: Full=4-coumarate--CoA ligase-like 4 && PF00501:AMP-binding enzyme|PF13193:AMP-binding enzyme C-terminal domain	AMP-binding
HORVU.MOREX.r2.4HG0335910	52.4579	76.9967	29.6382	90.9497	- && - && PF03703:Bacterial PH domain	-
HORVU.MOREX.r2.7HG0532400	31.2836	9.37194	38.2204	8.38207	- && Q9LXA5.1 RecName: Full=L-type lectin-domain containing receptor kinase IX.1; Short=LecRK-IX.1; Flags: Precursor && PF00069:Protein kinase domain|PF00139:Legume lectin domain	Pkinase
HORVU.MOREX.r2.4HG0323110	14.7273	7.52853	26.3092	7.108	- && Q6R0E3.2 RecName: Full=Telomere repeat-binding protein 5; AltName: Full=Protein TRF-LIKE 2 && -	-
HORVU.MOREX.r2.6HG0452760	2891.96	3923.04	763.512	1905.61	- && - && -	-
HORVU.MOREX.r2.4HG0345230	1.96359	3.41707	1.09596	4.08716	- && Q9SCP4.1 RecName: Full=Pentatricopeptide repeat-containing protein At3g53170 && PF13041:PPR repeat family	-
HORVU.MOREX.r2.2HG0157880	25.9017	6.20776	35.9648	8.31361	- && - && PF12734:Cysteine-rich TM module stress tolerance	-
HORVU.MOREX.r2.3HG0230060	49.0933	65.1295	36.4961	76.4214	- && Q8GYN9.2 RecName: Full=1,4-dihydroxy-2-naphthoyl-CoA synthase, peroxisomal; Short=DHNS; AltName: Full=Enoyl-CoA hydratase/isomerase D; Short=ECHID; AltName: Full=Naphthoate synthase && PF00378:Enoyl-CoA hydratase/isomerase	ECH
HORVU.MOREX.r2.4HG0321060	309.591	536.922	188.838	548.924	- && O80362.1 RecName: Full=50S ribosomal protein L10, chloroplastic; AltName: Full=CL10; Flags: Precursor && PF00466:Ribosomal protein L10	-
HORVU.MOREX.r2.2HG0178520	11.0884	4.77769	18.1448	3.54086	- && Q9FMV7.1 RecName: Full=Cytochrome P450 94B1 && PF00067:Cytochrome P450	p450
HORVU.MOREX.r2.1HG0062060	232.912	327.361	94.9132	314.756	- && - && -	-
HORVU.MOREX.r2.7HG0553010	0.110408	0	1.02276	0.0368266	- && Q67WJ2.1 RecName: Full=ATP-dependent zinc metalloprotease FTSH 6, chloroplastic; Short=OsFTSH6; Flags: Precursor && PF00004:ATPase family associated with various cellular activities (AAA)|PF01434:Peptidase family M41	AAA
HORVU.MOREX.r2.5HG0406630	0.879186	2.81451	1.69448	5.25781	- && Q9C7Z9.2 RecName: Full=Serine carboxypeptidase-like 18; Flags: Precursor && PF00450:Serine carboxypeptidase	Peptidase_S10
HORVU.MOREX.r2.7HG0604600	64.238	116.257	38.6287	152.849	- && - && PF11347:Protein of unknown function (DUF3148)	-
novel.652	0.105659	1.17986	0.023578	1.63252	- && - && -	-
HORVU.MOREX.r2.2HG0155670	1.75546	1.03862	3.73097	1.01888	- && Q8W486.1 RecName: Full=Uncharacterized protein At1g04910 && PF10250:GDP-fucose protein O-fucosyltransferase	-
HORVU.MOREX.r2.3HG0245600	53.9122	19.0226	53.3066	17.4739	- && - && -	-
HORVU.MOREX.r2.5HG0444230	31.3231	48.6964	27.403	58.2416	- && - && PF10063:Uncharacterized integral membrane protein (DUF2301)	-
HORVU.MOREX.r2.5HG0406460	240.533	93.8465	509.267	98.0161	- && - && -	-
HORVU.MOREX.r2.7HG0597710	115.146	178.1	57.3453	325.606	- && O65581.1 RecName: Full=Fructose-bisphosphate aldolase 5, cytosolic; Short=AtFBA5 && PF00274:Fructose-bisphosphate aldolase class-I	-
HORVU.MOREX.r2.3HG0258350	13.0293	24.8494	9.59506	29.7777	- && - && -	-
HORVU.MOREX.r2.3HG0194810	20.5641	16.3301	39.8822	14.9737	- && Q942N7.1 RecName: Full=Probable staphylococcal-like nuclease CAN1; AltName: Full=Calcium-dependent nuclease 1; Short=Ca(2+)-dependent nuclease 1 && PF00565:Staphylococcal nuclease homologue	-
HORVU.MOREX.r2.6HG0474890	11.7469	7.99397	21.7152	8.41458	- && Q9FVJ3.1 RecName: Full=ADP-ribosylation factor GTPase-activating protein AGD12; Short=ARF GAP AGD12; AltName: Full=Protein ARF-GAP DOMAIN 12; Short=AtAGD12; AltName: Full=Zinc- and calcium-binding protein; Short=AtZAC && PF00168:C2 domain|PF01412:Put	C2
HORVU.MOREX.r2.1HG0077590	7.50618	0.957467	7.35325	1.72184	- && Q9MBG5.1 RecName: Full=Probable calcium-binding protein CML30; AltName: Full=Calmodulin-like protein 30 && PF13499:EF-hand domain pair	-
HORVU.MOREX.r2.3HG0189330	7.07118	2.54582	13.9276	2.86877	- && Q9FJ45.1 RecName: Full=GDSL esterase/lipase At5g45910; AltName: Full=Extracellular lipase At5g45910; Flags: Precursor && PF00657:GDSL-like Lipase/Acylhydrolase	Lipase_GDSL
HORVU.MOREX.r2.5HG0406300	124.318	40.2499	487.467	64.533	- && Q9SVG5.1 RecName: Full=Berberine bridge enzyme-like 18; Short=AtBBE-like 18; Flags: Precursor && PF08031:Berberine and berberine like|PF01565:FAD binding domain	FAD_binding_4
HORVU.MOREX.r2.5HG0351780	1.65509	5.39751	1.16264	6.42069	- && B3TNB9.1 RecName: Full=Photosystem II CP43 reaction center protein; AltName: Full=PSII 43 kDa protein; AltName: Full=Protein CP-43; Flags: Precursor && PF00421:Photosystem II protein	-
novel.125	1.1012	0	1.71052	0.0292281	- && Q9LNG5.1 RecName: Full=Serine/threonine-protein phosphatase 7 long form homolog && -	-
HORVU.MOREX.r2.7HG0558340	10.5197	6.60409	17.6065	3.655	- && C3W7B0.1 RecName: Full=UDP-glucose:2-hydroxyflavanone C-glucosyltransferase; Short=OsCGT && PF00201:UDP-glucoronosyl and UDP-glucosyl transferase	UDPGT
HORVU.MOREX.r2.1HG0017400	4.13523	6.82557	1.60322	5.27608	- && - && PF05686:Glycosyl transferase family 90	-
HORVU.MOREX.r2.7HG0529600	0.347779	4.14957	0.760961	4.45704	- && Q9SGH6.1 RecName: Full=Alpha-dioxygenase 1; Short=Alpha DOX1; AltName: Full=Fatty acid dioxygenase AlphaDOX1; AltName: Full=Pathogen-induced oxygenase; AltName: Full=Plant alpha dioxygenase 1; Flags: Precursor && PF03098:Animal haem peroxidase	An_peroxidase
HORVU.MOREX.r2.1HG0003080	50.9665	27.2141	71.0498	29.115	- && - && PF05212:Protein of unknown function (DUF707)	-
HORVU.MOREX.r2.2HG0159210	0.680375	0.0288328	1.8255	0	- && - && -	-
HORVU.MOREX.r2.3HG0241620	42.4439	83.3173	16.8847	62.4998	- && - && -	-
HORVU.MOREX.r2.3HG0265330	0.699389	0.0646699	1.16793	0.038292	- && Q9LPV8.1 RecName: Full=Eukaryotic peptide chain release factor subunit 1-2; Short=Eukaryotic release factor 1-2; Short=eRF1-2; AltName: Full=Omnipotent suppressor protein 1 homolog 2; Short=SUP1 homolog 2 && PF03464:eRF1 domain 2|PF03465:eRF1 domain	-
HORVU.MOREX.r2.7HG0596410	3.8884	2.69653	10.6501	3.2662	- && Q8W486.1 RecName: Full=Uncharacterized protein At1g04910 && PF10250:GDP-fucose protein O-fucosyltransferase	-
HORVU.MOREX.r2.2HG0085320	5.14566	6.64026	7.49602	37.5599	- && Q766C3.1 RecName: Full=Aspartic proteinase nepenthesin-1; AltName: Full=Nepenthesin-I; Flags: Precursor && PF14543:Xylanase inhibitor N-terminal|PF14541:Xylanase inhibitor C-terminal	-
HORVU.MOREX.r2.3HG0196660	1.84957	0.327037	2.62544	0.18959	- && Q9T0N8.2 RecName: Full=Cytokinin dehydrogenase 1; AltName: Full=Cytokinin oxidase 1; Short=CKO 1; Short=COX 1; AltName: Full=ZmCKX1; Flags: Precursor && PF09265:Cytokinin dehydrogenase 1, FAD and cytokinin binding|PF01565:FAD binding domain	FAD_binding_4
HORVU.MOREX.r2.3HG0270990	43.7653	23.8869	79.4878	21.0075	- && - && PF05875:Ceramidase	-
HORVU.MOREX.r2.4HG0328220	6.762	15.4721	5.03944	16.0987	- && Q9SLV0.1 RecName: Full=Protein DETOXIFICATION 48; Short=AtDTX48; AltName: Full=Multidrug and toxic compound extrusion protein 48; Short=MATE protein 48; AltName: Full=Protein ABNORMAL SHOOT 4; AltName: Full=Protein BUSH-AND-CHLOROTIC-DWARF 1; Short=P	MatE
HORVU.MOREX.r2.6HG0502270	5.48026	2.4765	8.9403	2.28368	- && Q9ZVT9.4 RecName: Full=C2 and GRAM domain-containing protein At1g03370 && PF16016:Domain of unknown function (DUF4782)|PF00168:C2 domain|PF02893:GRAM domain	C2
HORVU.MOREX.r2.2HG0114300	28.2278	15.3269	45.3194	18.6927	- && Q0D5R3.1 RecName: Full=Cysteine-rich receptor-like protein kinase 6; Short=Cysteine-rich RLK6; Flags: Precursor && PF01657:Salt stress response/antifungal|PF07714:Protein tyrosine kinase	Pkinase_Tyr
HORVU.MOREX.r2.1HG0004080	15.0992	7.52854	32.4373	8.14402	- && - && PF04577:Protein of unknown function (DUF563)	-
HORVU.MOREX.r2.6HG0493720	0.54328	0.176285	2.22113	0.267735	- && F4HVY0.1 RecName: Full=Protein ECERIFERUM 1 && PF12076:WAX2 C-terminal domain|PF04116:Fatty acid hydroxylase superfamily	-
HORVU.MOREX.r2.5HG0400680	4.0447	7.50968	2.28693	6.81104	- && Q6Z9F4.1 RecName: Full=CBL-interacting protein kinase 6; AltName: Full=OsCIPK06 && PF00069:Protein kinase domain|PF03822:NAF domain	Pkinase
HORVU.MOREX.r2.1HG0043580	26.4969	39.7003	14.7377	42.8271	- && - && PF12646:Domain of unknown function (DUF3783)	-
HORVU.MOREX.r2.2HG0166760	0.0681266	0.38884	0.00962223	1.07387	- && A9ZPJ7.1 RecName: Full=Agmatine coumaroyltransferase-2 && PF02458:Transferase family	-
HORVU.MOREX.r2.6HG0492270	80.6135	136.035	41.1212	142.364	- && P82277.1 RecName: Full=30S ribosomal protein 2, chloroplastic; AltName: Full=Plastid-specific 30S ribosomal protein 2; Short=PSRP-2; Flags: Precursor && PF00076:RNA recognition motif. (a.k.a. RRM, RBD, or RNP domain)|PF14259:RNA recognition motif (a.	RRM_1
HORVU.MOREX.r2.6HG0515190	0.40169	1.83146	0.386061	1.83852	- && - && PF00646:F-box domain	F-box
HORVU.MOREX.r2.7HG0609910	5.03275	9.75196	2.9659	10.7247	- && Q653U3.1 RecName: Full=Auxin response factor 17 && PF02362:B3 DNA binding domain|PF06507:Auxin response factor|PF02309:AUX/IAA family	Auxin_resp
HORVU.MOREX.r2.6HG0523050	3.42115	1.68654	6.5089	1.1545	- && B9F4I8.1 RecName: Full=P-loop NTPase domain-containing protein LPA1; AltName: Full=Protein LOW PHYTIC ACID 1; Short=OsLpa1 && PF13671:AAA domain	-
HORVU.MOREX.r2.1HG0059330	98.7551	33.1333	268.09	51.3386	- && Q9SLP4.1 RecName: Full=Chitinase 1; AltName: Full=Tulip bulb chitinase-1; Short=TBC-1; Flags: Precursor && PF00704:Glycosyl hydrolases family 18	-
HORVU.MOREX.r2.2HG0082480	174.356	111.853	343.115	102.378	- && B8AU84.1 RecName: Full=Arginase 1, mitochondrial; AltName: Full=Arginine amidohydrolase 1; Flags: Precursor && PF00491:Arginase family	-
HORVU.MOREX.r2.5HG0415170	4.63983	2.15322	9.99347	1.95334	- && Q9SFU3.1 RecName: Full=Purple acid phosphatase 15; AltName: Full=Phytase; Flags: Precursor && PF14008:Iron/zinc purple acid phosphatase-like protein C|PF00149:Calcineurin-like phosphoesterase|PF16656:Purple acid Phosphatase, N-terminal domain	Metallophos
HORVU.MOREX.r2.5HG0425040	3.03054	5.97322	2.13841	6.2569	- && Q9SGA8.1 RecName: Full=UDP-glycosyltransferase 83A1 && PF00201:UDP-glucoronosyl and UDP-glucosyl transferase	UDPGT
HORVU.MOREX.r2.3HG0203750	228.057	101.443	370.06	92.6349	- && - && -	-
HORVU.MOREX.r2.1HG0077870	67.0996	113.115	36.0133	125.238	- && Q9XJ35.1 RecName: Full=ATP-dependent Clp protease proteolytic subunit-related protein 1, chloroplastic; Short=ClpR1; AltName: Full=nClpP5; Flags: Precursor && PF00574:Clp protease	-
HORVU.MOREX.r2.2HG0080910	0.132743	0.0263364	1.0955	0.0116957	- && P93596.1 RecName: Full=Obtusifoliol 14-alpha demethylase; AltName: Full=CYPLI; AltName: Full=Cytochrome P450 51; AltName: Full=Cytochrome P450-LIA1 && PF00067:Cytochrome P450	p450
HORVU.MOREX.r2.7HG0562850	4.29769	3.33792	10.9991	3.57493	- && - && PF04577:Protein of unknown function (DUF563)	-
HORVU.MOREX.r2.2HG0171260	20.7385	23.4383	7.57103	22.07	- && Q4QTJ1.1 RecName: Full=S-norcoclaurine synthase 2; Short=PsNCS2; Flags: Precursor && PF00407:Pathogenesis-related protein Bet v I family	-
HORVU.MOREX.r2.2HG0084050	2.04796	0.18479	2.36996	0.279514	- && C5YHI2.2 RecName: Full=Beta-sesquiphellandrene synthase; Short=SbTPS2 && PF03936:Terpene synthase family, metal binding domain|PF01397:Terpene synthase, N-terminal domain	-
HORVU.MOREX.r2.7HG0611620	4.60428	8.88585	1.38436	9.07179	- && - && PF14365:Domain of unknown function (DUF4409)|PF03080:Domain of unknown function (DUF239)	-
HORVU.MOREX.r2.7HG0547400	43.8204	28.105	69.913	26.1841	- && P55748.1 RecName: Full=Serine carboxypeptidase II-2; AltName: Full=CP-MII.2; Contains: RecName: Full=Serine carboxypeptidase II-2 chain A; Contains: RecName: Full=Serine carboxypeptidase II-2 chain B; Flags: Precursor && PF00450:Serine carboxypeptida	Peptidase_S10
HORVU.MOREX.r2.5HG0387970	1.18615	0.607445	5.40113	1.61871	- && - && -	-
HORVU.MOREX.r2.6HG0525530	4.09308	5.32297	2.12201	6.3589	- && Q2R435.2 RecName: Full=Protein LAZY 1 && -	-
HORVU.MOREX.r2.5HG0398280	209.602	390.204	116.37	410.618	- && Q8LCQ4.1 RecName: Full=Photosystem I chlorophyll a/b-binding protein 6, chloroplastic; AltName: Full=LHCI type III LHCA6; Flags: Precursor && PF00504:Chlorophyll A-B binding protein	-
HORVU.MOREX.r2.3HG0193470	18.1701	4.32971	40.4669	6.62783	- && Q9LZJ6.1 RecName: Full=RING-H2 finger protein ATL5; AltName: Full=RING-type E3 ubiquitin transferase ATL5 && PF13639:Ring finger domain	-
novel.103	0.37438	5.47209	0.795181	6.57123	- && - && -	-
HORVU.MOREX.r2.2HG0109140	55.9275	27.7069	105.6	27.1265	- && Q9LDN1.1 RecName: Full=Putative cysteine-rich receptor-like protein kinase 33; Short=Cysteine-rich RLK33; Flags: Precursor && PF00069:Protein kinase domain	Pkinase
HORVU.MOREX.r2.3HG0270090	94.3701	171.492	53.9408	192.938	- && Q9S829.1 RecName: Full=NAD(P)H-quinone oxidoreductase subunit O, chloroplastic; AltName: Full=NAD(P)H dehydrogenase subunit O; Short=NDH subunit O; Short=NDH-O; AltName: Full=NADH-plastoquinone oxidoreductase subunit O; Flags: Precursor && PF11910:Cy	-
HORVU.MOREX.r2.5HG0391810	17.9693	7.83745	28.4144	7.68424	- && Q9LXT4.1 RecName: Full=Plant cysteine oxidase 5 && PF07847:Protein of unknown function (DUF1637)	-
novel.95	0.0648691	2.9563	0.161808	2.83138	- && A1E9N8.1 RecName: Full=50S ribosomal protein L32, chloroplastic && -	-
HORVU.MOREX.r2.3HG0223690	14.2776	5.91358	44.0988	7.28831	- && Q9SU92.1 RecName: Full=Inorganic pyrophosphatase 3; Short=AtPPsPase3; Short=PPi phosphatase 3; Short=Pyrophosphate-specific phosphatase 3 && PF06888:Putative Phosphatase	-
HORVU.MOREX.r2.4HG0308830	311.764	436.826	202.028	495.734	- && O23049.1 RecName: Full=50S ribosomal protein L6, chloroplastic; AltName: Full=Protein EMBRYO DEFECTIVE 2394; Flags: Precursor && PF00347:Ribosomal protein L6	-
HORVU.MOREX.r2.3HG0235060	87.2048	156.038	48.8193	110.614	- && - && -	-
HORVU.MOREX.r2.1HG0036030	168.26	86.1518	256.478	93.2664	- && C0HJG8.1 RecName: Full=Basic secretory protease; AltName: Full=Boswellia basic secretory protease; Short=BBSP, partial [Boswellia serrata] && PF04450:Peptidase of plants and bacteria	-
HORVU.MOREX.r2.5HG0401430	38.1058	13.9234	62.1269	16.9557	- && Q9MAX3.1 RecName: Full=Sulfate transporter 1.2 && PF00916:Sulfate permease family|PF01740:STAS domain	Sulfate_transp
HORVU.MOREX.r2.4HG0283500	8.7202	17.9668	6.21527	20.2949	- && Q9SW80.3 RecName: Full=BEL1-like homeodomain protein 2; Short=BEL1-like protein 2; AltName: Full=Protein SAWTOOTH 1 && PF07526:Associated with HOX|PF05920:Homeobox KN domain	POX
HORVU.MOREX.r2.5HG0424170	0.454455	0.0840918	1.31379	0.178611	- && C0LGP4.1 RecName: Full=Probable LRR receptor-like serine/threonine-protein kinase At3g47570; Flags: Precursor && PF13855:Leucine rich repeat|PF08263:Leucine rich repeat N-terminal domain|PF00069:Protein kinase domain	Pkinase
HORVU.MOREX.r2.3HG0267210	3.61864	10.795	3.4468	12.1177	- && - && -	-
HORVU.MOREX.r2.5HG0422950	11.0513	2.21904	17.0042	1.9319	- && Q8LIL0.2 RecName: Full=Bisdemethoxycurcumin synthase; AltName: Full=Curcuminoid synthase && PF02797:Chalcone and stilbene synthases, C-terminal domain|PF00195:Chalcone and stilbene synthases, N-terminal domain	Chal_sti_synt_C
HORVU.MOREX.r2.2HG0169690	1.13257	0.152782	4.51043	0.3431	- && Q0D3N0.1 RecName: Full=Peroxidase 2; Flags: Precursor && PF00141:Peroxidase	-
HORVU.MOREX.r2.2HG0109710	17.8634	11.9435	32.1633	11.1954	- && F4I8Q7.1 RecName: Full=Vacuole membrane protein KMS2; AltName: Full=Protein KILLING ME SLOWLY 2 && PF09335:SNARE associated Golgi protein	-
HORVU.MOREX.r2.5HG0379780	0.889928	0.145273	7.86988	0.415694	- && Q9FMR3.1 RecName: Full=NAC domain-containing protein 90; Short=ANAC090 && PF02365:No apical meristem (NAM) protein	NAM
HORVU.MOREX.r2.4HG0330860	0.68396	0.902735	0.341437	2.99316	- && Q9M015.1 RecName: Full=Uncharacterized protein At5g01610 && PF04398:Protein of unknown function, DUF538	-
HORVU.MOREX.r2.2HG0079050	0.392763	0.257154	2.27418	0.375232	- && Q7XP01.2 RecName: Full=Probable protein phosphatase 2C 37; Short=OsPP2C37 && PF00481:Protein phosphatase 2C	PP2C
HORVU.MOREX.r2.5HG0404820	24.099	18.0429	44.0764	18.0585	- && Q8W486.1 RecName: Full=Uncharacterized protein At1g04910 && PF10250:GDP-fucose protein O-fucosyltransferase	-
HORVU.MOREX.r2.4HG0282430	33.0116	14.9172	60.1954	17.6764	- && Q0V9N0.1 RecName: Full=SEC14-like protein 5 && PF03765:CRAL/TRIO, N-terminal domain|PF00650:CRAL/TRIO domain	CRAL_TRIO_N
HORVU.MOREX.r2.3HG0256720	10.444	8.42273	26.1148	10.7673	- && P50160.1 RecName: Full=Sex determination protein tasselseed-2 && PF00106:short chain dehydrogenase	adh_short
HORVU.MOREX.r2.5HG0426190	689.62	842.398	310.668	1064.8	- && P80883.1 RecName: Full=Cytochrome b6-f complex subunit 7; AltName: Full=Cytochrome b6-f complex subunit PetM; AltName: Full=Cytochrome b6-f complex subunit VII && PF08041:PetM family of cytochrome b6f complex subunit 7	-
HORVU.MOREX.r2.6HG0524990	246.444	379.581	111.762	401.414	- && Q8L803.1 RecName: Full=50S ribosomal protein L9, chloroplastic; AltName: Full=CL9; Flags: Precursor && PF03948:Ribosomal protein L9, C-terminal domain|PF01281:Ribosomal protein L9, N-terminal domain	-
HORVU.MOREX.r2.5HG0436020	43.9456	6.51504	65.4262	15.4117	- && Q0DJ94.2 RecName: Full=Probable calcium-binding protein CML21; AltName: Full=Calmodulin-like protein 21 && PF13405:EF-hand domain	-
HORVU.MOREX.r2.7HG0536060	55.127	16.1731	124.327	21.6397	- && - && -	-
HORVU.MOREX.r2.7HG0581900	2.61507	1.09521	5.19515	0.586124	- && O23522.2 RecName: Full=Phospholipase A1-Ibeta2, chloroplastic; Flags: Precursor && PF01764:Lipase (class 3)	Lipase_3
HORVU.MOREX.r2.6HG0455440	24.5497	3.81287	58.5107	9.24421	- && Q84W40.2 RecName: Full=RING-H2 finger protein ATL11; AltName: Full=RING-type E3 ubiquitin transferase ATL11; Flags: Precursor && PF13639:Ring finger domain	-
HORVU.MOREX.r2.5HG0399290	2.25183	1.12451	4.37224	0.997483	- && Q9LFN5.2 RecName: Full=Glutamate receptor 2.5; AltName: Full=Ligand-gated ion channel 2.5; Flags: Precursor && PF00497:Bacterial extracellular solute-binding proteins, family 3|PF00060:Ligand-gated ion channel|PF01094:Receptor family ligand binding r	ANF_receptor
HORVU.MOREX.r2.5HG0388270	5230.47	6186.28	2047.32	7155.02	- && Q40004.1 RecName: Full=Ribulose bisphosphate carboxylase small chain, chloroplastic; Short=RuBisCO small subunit; Flags: Precursor && PF12338:Ribulose-1,5-bisphosphate carboxylase small subunit|PF00101:Ribulose bisphosphate carboxylase, small chain	-
HORVU.MOREX.r2.4HG0334170	68.5891	130.563	38.7763	154.68	- && Q94AQ8.1 RecName: Full=Photosynthetic NDH subunit of subcomplex B 2, chloroplastic; Short=Protein PnsB2; AltName: Full=NAD(P)H DEHYDROGENASE SUBUNIT 45; AltName: Full=NDH-DEPENDENT CYCLIC ELECTRON FLOW 2; Flags: Precursor && -	-
HORVU.MOREX.r2.6HG0493470	0.0217753	1.62001	0	1.10208	- && - && -	-
HORVU.MOREX.r2.6HG0508410	40.0713	21.3918	120.201	22.3128	- && Q41001.1 RecName: Full=Blue copper protein; Flags: Precursor && PF02298:Plastocyanin-like domain	Cu_bind_like
HORVU.MOREX.r2.3HG0246950	25.044	14.9272	53.4465	15.5032	- && P0C8Q9.3 RecName: Full=Uncharacterized protein At5g19025 && -	-
HORVU.MOREX.r2.5HG0364440	3.28159	1.97837	5.86559	1.55372	- && - && PF07839:Plant calmodulin-binding domain	-
HORVU.MOREX.r2.7HG0560340	120.619	16.3494	326.551	54.4638	- && - && -	-
HORVU.MOREX.r2.7HG0528060	1.91049	1.11154	3.5064	1.13234	- && - && PF13855:Leucine rich repeat	-
HORVU.MOREX.r2.5HG0398130	82.9314	49.9375	140.891	42.5873	- && Q69P80.1 RecName: Full=Copper transporter 5.1; Short=OsCOPT5.1 && PF04145:Ctr copper transporter family	-
HORVU.MOREX.r2.5HG0431690	0.323196	0.0414563	4.31954	0.0254296	- && Q05968.1 RecName: Full=Pathogenesis-related protein 1; Flags: Precursor && PF00188:Cysteine-rich secretory protein family	SCP
HORVU.MOREX.r2.4HG0339430	7.14283	10.7347	4.94893	11.5211	- && - && PF03081:Exo70 exocyst complex subunit	Exo70
HORVU.MOREX.r2.3HG0186320	101.694	42.8636	313.948	67.0711	- && Q9LIN2.1 RecName: Full=GDSL esterase/lipase At3g26430; AltName: Full=Extracellular lipase At3g26430; Flags: Precursor && PF00657:GDSL-like Lipase/Acylhydrolase	Lipase_GDSL
HORVU.MOREX.r2.6HG0451760	31.3707	13.7572	48.7293	12.0061	- && P34913.2 RecName: Full=Bifunctional epoxide hydrolase 2; Includes: RecName: Full=Cytosolic epoxide hydrolase 2; Short=CEH; AltName: Full=Epoxide hydratase; AltName: Full=Soluble epoxide hydrolase; Short=SEH; Includes: RecName: Full=Lipid-phosphate ph	Abhydrolase_1
HORVU.MOREX.r2.4HG0343390	15.8017	9.34786	36.1642	11.3883	- && Q6PHS9.1 RecName: Full=Voltage-dependent calcium channel subunit alpha-2/delta-2; AltName: Full=Protein ducky; AltName: Full=Voltage-gated calcium channel subunit alpha-2/delta-2; Contains: RecName: Full=Voltage-dependent calcium channel subunit alph	VWA
HORVU.MOREX.r2.2HG0127690	0.230264	5.30582	0.484591	5.24778	- && A1E9M6.1 RecName: Full=30S ribosomal protein S8, chloroplastic && PF00410:Ribosomal protein S8	-
HORVU.MOREX.r2.3HG0204200	23.7799	11.2661	41.3534	9.43926	- && O64697.1 RecName: Full=Cytochrome P450 710A1; AltName: Full=C-22 sterol desaturase && PF00067:Cytochrome P450	p450
HORVU.MOREX.r2.2HG0082650	223.206	344.832	124.787	392.822	- && - && -	-
HORVU.MOREX.r2.3HG0244430	5.17523	8.84841	3.04401	10.1465	- && - && PF13041:PPR repeat family|PF12854:PPR repeat	-
HORVU.MOREX.r2.1HG0051840	2.61019	4.26595	1.43573	4.91349	- && Q05627.2 RecName: Full=Uncharacterized protein Cbei_0202; AltName: Full=ORF1 && PF01494:FAD binding domain	FAD_binding_3
novel.331	5.71911	11.6639	3.16943	11.7014	- && - && -	-
HORVU.MOREX.r2.1HG0046990	23.1554	11.7358	49.6681	18.1808	- && Q6L4D4.1 RecName: Full=Probable calcium-binding protein CML15; AltName: Full=Calmodulin-like protein 15 && PF13499:EF-hand domain pair	-
novel.1606	1.04703	1.99725	0.439909	2.22392	- && - && -	-
HORVU.MOREX.r2.2HG0139220	1.08678	1.06847	2.9281	0.666486	- && Q9LYS2.2 RecName: Full=ABC transporter C family member 10; Short=ABC transporter ABCC.10; Short=AtABCC10; AltName: Full=ATP-energized glutathione S-conjugate pump 14; AltName: Full=Glutathione S-conjugate-transporting ATPase 14; AltName: Full=Multidr	ABC_tran
HORVU.MOREX.r2.5HG0406570	8.52845	14.5466	8.52594	23.4193	- && - && -	-
HORVU.MOREX.r2.3HG0254560	2.60563	6.05753	1.65761	8.47919	- && Q9M390.1 RecName: Full=Protein NRT1/ PTR FAMILY 8.1; Short=AtNPF8.1; AltName: Full=Peptide transporter PTR1 && PF00854:POT family	-
HORVU.MOREX.r2.2HG0170070	3704.56	2841.03	5140.33	2386.98	- && P25776.2 RecName: Full=Oryzain alpha chain; Flags: Precursor && PF08246:Cathepsin propeptide inhibitor domain (I29)|PF00396:Granulin|PF00112:Papain family cysteine protease	Peptidase_C1
HORVU.MOREX.r2.4HG0329890	32.8927	10.4657	68.543	13.7024	- && Q9S845.1 RecName: Full=GDP-mannose transporter GONST3; AltName: Full=Protein GOLGI NUCLEOTIDE SUGAR TRANSPORTER 3 && PF03151:Triose-phosphate Transporter family	-
HORVU.MOREX.r2.1HG0014140	50.9169	25.1356	86.8931	21.3804	- && Q9SX65.1 RecName: Full=1,4-dihydroxy-2-naphthoyl-CoA thioesterase 1; Short=AtDHNAT1; Short=DHNA-CoA thioesterase 1 && PF03061:Thioesterase superfamily	4HBT
HORVU.MOREX.r2.2HG0162640	1.7646	0.647274	4.76205	0.46535	- && - && -	-
HORVU.MOREX.r2.2HG0095190	11.0354	6.47671	34.3461	7.18232	- && - && -	-
HORVU.MOREX.r2.1HG0014980	68.4465	39.4643	230.095	50.7241	- && - && -	-
HORVU.MOREX.r2.4HG0344280	3.06768	12.656	2.37423	14.9596	- && Q9XJ61.1 RecName: Full=MADS-box transcription factor 51; Short=OsMADS51; AltName: Full=OsMADS65 && PF00319:SRF-type transcription factor (DNA-binding and dimerisation domain)	SRF-TF
HORVU.MOREX.r2.3HG0266320	0.0742524	0	2.79646	0	- && - && PF05678:VQ motif	-
HORVU.MOREX.r2.7HG0551510	3.19969	3.52846	15.2137	4.57952	- && Q67X83.1 RecName: Full=26.2 kDa heat shock protein, mitochondrial; Short=OsHsp26.2; Flags: Precursor && PF00011:Hsp20/alpha crystallin family	-
HORVU.MOREX.r2.2HG0178460	3.81435	3.24803	9.87401	3.31097	- && Q9ZRW8.1 RecName: Full=Glutathione S-transferase U19; Short=AtGSTU19; AltName: Full=GST class-tau member 19; AltName: Full=Glutathione S-transferase 8 && PF13417:Glutathione S-transferase, N-terminal domain|PF00043:Glutathione S-transferase, C-termin	GST_C
HORVU.MOREX.r2.5HG0385510	0	2.44797	0	1.92836	- && - && -	-
HORVU.MOREX.r2.6HG0507000	5.97319	4.38137	10.6963	4.7502	- && - && -	-
HORVU.MOREX.r2.3HG0273480	13.5249	8.83593	24.7172	9.72568	- && Q8LDS4.1 RecName: Full=Protein SODIUM POTASSIUM ROOT DEFECTIVE 1; Short=NaKR1; AltName: Full=Heavy metal-associated plant protein 2; Short=AtHPP02; AltName: Full=Nuclear-enriched phloem companion cell gene 6; Short=NPCC6 && PF00403:Heavy-metal-associ	HMA
HORVU.MOREX.r2.1HG0030110	17.1461	7.58022	29.2071	9.35963	- && Q9LFP7.1 RecName: Full=Probable receptor-like protein kinase At5g15080 && PF00069:Protein kinase domain	Pkinase
HORVU.MOREX.r2.4HG0328360	6.39082	2.5796	13.2276	2.28283	- && Q9M401.1 RecName: Full=Branched-chain-amino-acid aminotransferase 3, chloroplastic; Short=Atbcat-3; Flags: Precursor && PF01063:Amino-transferase class IV	-
HORVU.MOREX.r2.7HG0597690	4.98904	8.49304	2.28622	7.1309	- && Q8LPQ6.1 RecName: Full=ABC transporter B family member 28; Short=ABC transporter ABCB.28; Short=AtABCB28; AltName: Full=Non-intrinsic ABC protein 8; AltName: Full=TAP-related protein 1 && PF00664:ABC transporter transmembrane region|PF00005:ABC trans	ABC_membrane
HORVU.MOREX.r2.5HG0403840	16.7629	31.76	11.2749	35.8363	- && - && PF14389:Leucine-zipper of ternary complex factor MIP1|PF04784:Protein of unknown function, DUF547	-
HORVU.MOREX.r2.2HG0101710	53.8436	28.2304	76.229	31.3821	- && Q6K7H2.1 RecName: Full=UMP-CMP kinase 4; AltName: Full=Deoxycytidylate kinase 4; Short=CK 4; Short=dCMP kinase 4; AltName: Full=Uridine monophosphate/cytidine monophosphate kinase 4; Short=UMP/CMP kinase 4; Short=UMP/CMPK 4 && PF00406:Adenylate kinas	ADK
HORVU.MOREX.r2.1HG0076230	3.96874	6.778	0.285001	2.02647	- && Q8VYE5.1 RecName: Full=Glucan endo-1,3-beta-glucosidase 12; AltName: Full=(1->3)-beta-glucan endohydrolase 12; Short=(1->3)-beta-glucanase 12; AltName: Full=Beta-1,3-endoglucanase 12; Short=Beta-1,3-glucanase 12; Flags: Precursor && PF07983:X8 domain	Glyco_hydro_17
HORVU.MOREX.r2.6HG0451410	100.437	181.259	50.5228	180.116	- && - && -	-
novel.564	40.7191	7.93491	59.699	14.6432	- && - && -	-
HORVU.MOREX.r2.2HG0152280	2.60095	0.854031	4.06614	1.18216	- && - && -	-
HORVU.MOREX.r2.3HG0249560	1.50383	0.590355	6.16837	0.971366	- && Q8S1N1.1 RecName: Full=Magnesium transporter MRS2-E >A2WXD3.1 RecName: Full=Magnesium transporter MRS2-E && -	-
HORVU.MOREX.r2.1HG0069140	4.65894	10.0469	0.846739	11.188	- && - && -	-
HORVU.MOREX.r2.5HG0427530	155.727	94.518	300.653	83.9544	- && P49299.1 RecName: Full=Citrate synthase, glyoxysomal; AltName: Full=GCS; Flags: Precursor && PF00285:Citrate synthase	Citrate_synt
novel.1085	2.32076	3.58702	1.51896	4.21645	- && - && -	-
HORVU.MOREX.r2.3HG0189800	39.4998	69.6721	19.8861	87.4201	- && Q8W487.1 RecName: Full=Uncharacterized protein At2g39795, mitochondrial; Flags: Precursor && PF02330:Mitochondrial glycoprotein	-
HORVU.MOREX.r2.1HG0044660	0.92715	0.371973	5.38731	1.04808	- && Q94LR4.1 RecName: Full=Expansin-B4; AltName: Full=Beta-expansin-4; AltName: Full=OsEXPB4; AltName: Full=OsaEXPb1.7; Flags: Precursor && PF01357:Pollen allergen|PF03330:Rare lipoprotein A (RlpA)-like double-psi beta-barrel	-
HORVU.MOREX.r2.4HG0294660	10.9732	5.82075	12.3263	5.09017	- && Q8RWD5.1 RecName: Full=Coiled-coil domain-containing protein SCD2; AltName: Full=Protein STOMATAL CYTOKINESIS DEFECTIVE 2 && -	-
HORVU.MOREX.r2.2HG0115530	8.37876	7.66612	21.3683	5.93878	- && P87027.1 RecName: Full=Septum-promoting GTP-binding protein 1; AltName: Full=GTPase spg1; AltName: Full=Sid3 protein && PF00071:Ras family	Ras
HORVU.MOREX.r2.3HG0257280	39.4558	93.5497	27.5553	82.3037	- && Q94BN0.1 RecName: Full=BTB/POZ and TAZ domain-containing protein 2; AltName: Full=BTB and TAZ domain protein 2 && PF00651:BTB/POZ domain|PF02135:TAZ zinc finger	zf-TAZ
HORVU.MOREX.r2.1HG0041150	24.4723	19.0653	43.0117	18.5969	- && Q8S7M7.1 RecName: Full=Plant intracellular Ras-group-related LRR protein 5; AltName: Full=Intracellular Ras-group-related LRR protein 5; Short=OsIRL5 && PF13855:Leucine rich repeat	-
HORVU.MOREX.r2.6HG0524760	119.223	177.642	70.8725	198.008	- && O81208.1 RecName: Full=Light-harvesting complex-like protein OHP1, chloroplastic; AltName: Full=High-light-induced protein; Short=AtHLIP; AltName: Full=One helix protein; AltName: Full=One helix protein 1; AltName: Full=Protein PIGMENT DEFECTIVE 335;	-
HORVU.MOREX.r2.2HG0100200	12.6274	8.84175	29.2418	11.9547	- && - && -	-
HORVU.MOREX.r2.4HG0315500	86.8307	29.1872	143.99	22.7056	- && Q10LX4.1 RecName: Full=Probable calcium-binding protein CML27; AltName: Full=Calmodulin-like protein 27 && PF13405:EF-hand domain|PF13499:EF-hand domain pair	-
HORVU.MOREX.r2.7HG0531400	0.112017	1.52688	0.26783	1.46271	- && - && PF13855:Leucine rich repeat	-
HORVU.MOREX.r2.5HG0429870	1.78054	2.47138	1.18533	3.40676	- && O23887.1 RecName: Full=Indole-3-acetaldehyde oxidase; Short=IAA oxidase; AltName: Full=Aldehyde oxidase; Short=ZmAO-1 && PF00941:FAD binding domain in molybdopterin dehydrogenase|PF02738:Molybdopterin-binding domain of aldehyde dehydrogenase|PF03450:	Fer2
HORVU.MOREX.r2.2HG0090570	0.254627	0.0341394	1.3265	0.0425612	- && Q9LDE1.1 RecName: Full=Transcription factor MYB108; AltName: Full=Myb-related protein 108; Short=AtMYB108; AltName: Full=Protein BOTRYTIS-SUSCEPTIBLE 1 && PF00249:Myb-like DNA-binding domain	Myb_DNA-binding
HORVU.MOREX.r2.3HG0268980	6.66637	2.11353	11.3203	1.48331	- && P0DH86.1 RecName: Full=G-type lectin S-receptor-like serine/threonine-protein kinase SRK; Flags: Precursor && PF07714:Protein tyrosine kinase	Pkinase_Tyr
HORVU.MOREX.r2.3HG0232910	1.67056	0.800303	4.10113	0.503318	- && - && PF12906:RING-variant domain|PF12428:Protein of unknown function (DUF3675)	-
HORVU.MOREX.r2.2HG0079570	66.6732	101.842	46.5582	99.3312	- && Q7XTJ3.2 RecName: Full=Pyruvate dehydrogenase E1 component subunit alpha-3, chloroplastic; Flags: Precursor && PF00676:Dehydrogenase E1 component	-
HORVU.MOREX.r2.3HG0241860	4.66511	2.51844	12.4286	3.60657	- && Q9SD84.1 RecName: Full=PLASMODESMATA CALLOSE-BINDING PROTEIN 2; Short=AtPDCB2; AltName: Full=Glucan endo-1,3-beta-glucosidase-like protein 3; Flags: Precursor && PF07983:X8 domain	-
HORVU.MOREX.r2.7HG0593520	1.27329	1.04004	2.37467	0.440807	- && Q9SD62.1 RecName: Full=Putative receptor-like protein kinase At3g47110; Flags: Precursor && PF13855:Leucine rich repeat|PF00069:Protein kinase domain	Pkinase
HORVU.MOREX.r2.5HG0379890	38.0348	21.7334	62.9158	18.8872	- && Q8LPS1.1 RecName: Full=Long chain acyl-CoA synthetase 6, peroxisomal; Flags: Precursor && PF00501:AMP-binding enzyme	AMP-binding
HORVU.MOREX.r2.5HG0394730	112.684	157.069	54.6529	129.683	- && Q6H5L4.2 RecName: Full=Probable trehalose-phosphate phosphatase 7; Short=OsTPP7; AltName: Full=Trehalose 6-phosphate phosphatase && PF02358:Trehalose-phosphatase	-
HORVU.MOREX.r2.7HG0612970	19.4951	35.9293	10.8964	35.6974	- && - && -	-
HORVU.MOREX.r2.2HG0170780	2.81801	1.44541	4.0596	0.753963	- && P17770.1 RecName: Full=Aromatic-L-amino-acid decarboxylase; Short=AADC; AltName: Full=DOPA decarboxylase; AltName: Full=Tryptophan decarboxylase && PF00282:Pyridoxal-dependent decarboxylase conserved domain	-
HORVU.MOREX.r2.5HG0384580	6.82321	17.0351	4.56862	16.6957	- && - && -	-
HORVU.MOREX.r2.2HG0152900	0	0.291562	0	1.23959	- && - && PF12681:Glyoxalase-like domain	-
HORVU.MOREX.r2.3HG0239480	9.99155	6.46524	24.0444	6.89111	- && Q2MHE4.1 RecName: Full=Serine/threonine-protein kinase HT1; AltName: Full=High leaf temperature protein 1 && PF07714:Protein tyrosine kinase	Pkinase_Tyr
HORVU.MOREX.r2.2HG0144330	61.3172	51.2161	126.258	57.0579	- && Q9FF99.1 RecName: Full=Probable amino acid permease 7; AltName: Full=Amino acid transporter AAP7 && PF01490:Transmembrane amino acid transporter protein	Aa_trans
HORVU.MOREX.r2.7HG0529580	4.12184	5.77749	2.28782	6.12172	- && Q9HSF6.1 RecName: Full=Ribonuclease HI; Short=Halo-RNase HI; Short=RNase HI && PF13456:Reverse transcriptase-like|PF01693:Caulimovirus viroplasmin	-
HORVU.MOREX.r2.4HG0283690	11.7137	3.36493	18.6336	2.76417	- && - && -	-
HORVU.MOREX.r2.5HG0357240	4.77138	8.42532	4.47604	9.73987	- && Q8H5D4.1 RecName: Full=Patatin-like protein 3; Short=OsPLP3 >B8B7E7.1 RecName: Full=Patatin-like protein 3 && -	-
HORVU.MOREX.r2.7HG0600630	4.33775	1.40354	21.7989	4.63488	- && A2XQD3.1 RecName: Full=G-type lectin S-receptor-like serine/threonine-protein kinase LECRK2; Short=OsLecRK2; Flags: Precursor && PF00069:Protein kinase domain|PF01453:D-mannose binding lectin	Pkinase
HORVU.MOREX.r2.6HG0512400	34.6519	5.9278	160.78	6.46231	- && - && PF13202:EF hand	-
HORVU.MOREX.r2.4HG0348230	0.237469	0.869237	0.687351	2.10968	- && - && PF13962:Domain of unknown function	-
HORVU.MOREX.r2.2HG0132080	23.6069	9.80405	47.1501	13.7073	- && Q9FGH9.1 RecName: Full=Exocyst complex component EXO70B1; Short=AtExo70b1; AltName: Full=Exocyst subunit Exo70 family protein B1 && PF03081:Exo70 exocyst complex subunit	Exo70
HORVU.MOREX.r2.1HG0041950	47.1397	71.1577	24.9865	79.6423	- && O82290.2 RecName: Full=Probable inactive shikimate kinase like 2, chloroplastic; Short=AtSKL2; Flags: Precursor && PF01202:Shikimate kinase	SKI
HORVU.MOREX.r2.3HG0233470	8.91046	6.20901	18.3196	4.92732	- && - && PF12146:Serine aminopeptidase, S33	-
HORVU.MOREX.r2.5HG0422900	0.0475951	1.29298	0.111804	1.45836	- && P29250.2 RecName: Full=Linoleate 9S-lipoxygenase 2; AltName: Full=Lipoxygenase 2; AltName: Full=Lipoxygenase L-2 && PF01477:PLAT/LH2 domain|PF00305:Lipoxygenase	Lipoxygenase
HORVU.MOREX.r2.2HG0144100	139.605	47.1141	256.156	51.7539	- && - && -	-
HORVU.MOREX.r2.2HG0152020	15.0438	4.25914	21.7556	5.09405	- && Q0WUU6.1 RecName: Full=Probable polyol transporter 4 && PF00083:Sugar (and other) transporter	Sugar_tr
HORVU.MOREX.r2.7HG0537810	0.724549	0.206354	1.85137	0.196676	- && C0LGX3.1 RecName: Full=LRR receptor-like serine/threonine-protein kinase HSL2; AltName: Full=Protein HAESA-LIKE2; Flags: Precursor && PF13855:Leucine rich repeat|PF00069:Protein kinase domain	Pkinase
HORVU.MOREX.r2.3HG0202820	3.81132	1.12528	8.40924	1.88572	- && - && PF05553:Cotton fibre expressed protein	-
HORVU.MOREX.r2.3HG0261110	0.677866	2.00736	0.485671	2.02503	- && - && -	-
HORVU.MOREX.r2.4HG0317590	29.6641	8.61106	79.3551	10.8981	- && Q9SD53.1 RecName: Full=UPF0481 protein At3g47200 && PF03140:Plant protein of unknown function	-
HORVU.MOREX.r2.6HG0452140	50.7764	27.2475	112.161	42.515	- && Q5NUF4.1 RecName: Full=2-hydroxyisoflavanone dehydratase; AltName: Full=Carboxylesterase HIDM && PF07859:alpha/beta hydrolase fold	Abhydrolase_3
HORVU.MOREX.r2.6HG0458150	76.2159	119.811	62.8423	131.065	- && - && -	-
HORVU.MOREX.r2.3HG0250180	28.9213	51.3921	14.4632	42.9219	- && Q66PF2.1 RecName: Full=Putative UDP-rhamnose:rhamnosyltransferase 1; Short=FaRT1; AltName: Full=Glycosyltransferase 4; Short=FaGT4 && PF13579:Glycosyl transferase 4-like domain|PF00201:UDP-glucoronosyl and UDP-glucosyl transferase	UDPGT
HORVU.MOREX.r2.3HG0244870	21.7054	16.6152	42.488	16.3171	- && Q8GUL1.1 RecName: Full=Autophagy-related protein 18g; Short=AtATG18g && PF12490:Breast carcinoma amplified sequence 3	-
HORVU.MOREX.r2.2HG0079560	360.143	787.255	280.812	963.399	- && - && PF01852:START domain	START
HORVU.MOREX.r2.2HG0114240	1.69322	0.66592	2.79625	0.970076	- && Q0D5R3.1 RecName: Full=Cysteine-rich receptor-like protein kinase 6; Short=Cysteine-rich RLK6; Flags: Precursor && PF01657:Salt stress response/antifungal|PF00069:Protein kinase domain	Pkinase
HORVU.MOREX.r2.2HG0138520	0.604441	6.51218	0.464971	3.00762	- && A3BE68.1 RecName: Full=Probable histidine kinase 1; Short=OsHK1 && PF02518:Histidine kinase-, DNA gyrase B-, and HSP90-like ATPase|PF00512:His Kinase A (phospho-acceptor) domain	HATPase_c
HORVU.MOREX.r2.3HG0187510	3.67587	2.08108	7.45345	2.12656	- && - && PF13962:Domain of unknown function|PF12796:Ankyrin repeats (3 copies)	-
HORVU.MOREX.r2.5HG0407490	161.742	132.808	342.977	131.636	- && Q41822.1 RecName: Full=Protein Iojap, chloroplastic; Flags: Precursor && PF02410:Ribosomal silencing factor during starvation	DUF143
HORVU.MOREX.r2.4HG0283430	216.861	161.006	433.628	180.059	- && Q4R5M2.1 RecName: Full=Cathepsin B; Contains: RecName: Full=Cathepsin B light chain; Contains: RecName: Full=Cathepsin B heavy chain; Flags: Precursor && PF08127:Peptidase family C1 propeptide|PF00112:Papain family cysteine protease	Peptidase_C1
HORVU.MOREX.r2.2HG0151330	40.4048	80.9873	18.2353	72.8507	- && - && PF02620:Uncharacterized ACR, COG1399	-
HORVU.MOREX.r2.3HG0273830	5.09873	3.56465	12.4549	3.976	- && O48958.1 RecName: Full=4-hydroxyphenylacetaldehyde oxime monooxygenase; AltName: Full=Cytochrome P450 71E1 && PF00067:Cytochrome P450	p450
HORVU.MOREX.r2.4HG0275930	5.84604	10.3648	2.84944	9.86771	- && - && -	-
HORVU.MOREX.r2.1HG0066640	5.20447	3.19633	12.9736	2.65506	- && Q9FMV7.1 RecName: Full=Cytochrome P450 94B1 && PF00067:Cytochrome P450	p450
HORVU.MOREX.r2.4HG0330800	15.9138	25.7647	6.81295	25.8004	- && - && -	-
HORVU.MOREX.r2.4HG0293630	397.192	237.324	613.18	224.362	- && - && PF03489:Saposin-like type B, region 2|PF05184:Saposin-like type B, region 1	-
HORVU.MOREX.r2.2HG0115750	0	0.846508	0	1.52119	- && - && -	-
HORVU.MOREX.r2.3HG0197330	0.734678	0.415672	4.6431	0.635775	- && P24631.1 RecName: Full=17.5 kDa class II heat shock protein && PF00011:Hsp20/alpha crystallin family	-
HORVU.MOREX.r2.3HG0225070	19.9748	12.6959	44.1525	10.0653	- && Q94CD5.1 RecName: Full=Ubiquitin-like modifier-activating enzyme atg7; AltName: Full=ATG12-activating enzyme E1 atg7; AltName: Full=Autophagy-related protein 7; Short=AtAPG7; AltName: Full=Protein PEROXISOME UNUSUAL POSITIONING 4 && PF16420:Ubiquitin	-
HORVU.MOREX.r2.2HG0093300	10.5752	6.21654	19.0639	6.46346	- && B8B5U8.1 RecName: Full=Probable E3 ubiquitin-protein ligase BAH1-like 1; AltName: Full=RING-type E3 ubiquitin transferase BAH1-like 1 && -	-
HORVU.MOREX.r2.5HG0435700	0.803111	0.39868	2.7074	0.185942	- && Q0D5R3.1 RecName: Full=Cysteine-rich receptor-like protein kinase 6; Short=Cysteine-rich RLK6; Flags: Precursor && PF00069:Protein kinase domain|PF01657:Salt stress response/antifungal	Pkinase
HORVU.MOREX.r2.4HG0322380	58.5061	55.1354	13.0768	73.8679	- && Q9LV60.1 RecName: Full=Cysteine-rich repeat secretory protein 55; Flags: Precursor && PF01657:Salt stress response/antifungal	-
HORVU.MOREX.r2.1HG0010770	8.90593	3.43464	5.79354	1.5724	- && Q93Y91.1 RecName: Full=Sugar transport protein 5; AltName: Full=Hexose transporter 5 && PF00083:Sugar (and other) transporter	Sugar_tr
novel.404	0.18391	2.18273	0.0401028	1.86935	- && A4GYN8.1 RecName: Full=30S ribosomal protein S12-B, chloroplastic && PF00164:Ribosomal protein S12/S23	Ribosomal_S12
HORVU.MOREX.r2.5HG0425850	13.5367	10.3538	34.8944	10.4964	- && - && -	-
HORVU.MOREX.r2.5HG0382780	13.2749	8.50864	17.7121	3.97348	- && - && -	-
HORVU.MOREX.r2.5HG0370290	0.0629014	0.0175875	0.317646	0	- && - && -	-
HORVU.MOREX.r2.4HG0329560	104.459	61.9234	234.494	72.7483	- && Q94AZ2.2 RecName: Full=Sugar transport protein 13; AltName: Full=Hexose transporter 13; AltName: Full=Multicopy suppressor of snf4 deficiency protein 1 && PF00083:Sugar (and other) transporter	Sugar_tr
HORVU.MOREX.r2.3HG0255040	53.3089	21.7721	104.619	35.5398	- && - && PF03242:Late embryogenesis abundant protein	-
HORVU.MOREX.r2.6HG0506960	2.08287	1.18949	3.67513	1.38299	- && Q9CAA7.1 RecName: Full=Putative U-box domain-containing protein 42; AltName: Full=Plant U-box protein 42 && PF04564:U-box domain	U-box
HORVU.MOREX.r2.1HG0052840	6.45486	9.62611	5.06527	10.6664	- && Q8L7S6.1 RecName: Full=Beta-hexosaminidase 3; AltName: Full=Beta-GlcNAcase 3; AltName: Full=Beta-N-acetylhexosaminidase 3; AltName: Full=Beta-hexosaminidase 1; Short=AtHEX1; AltName: Full=N-acetyl-beta-glucosaminidase 3; Flags: Precursor && PF14845:b	Glyco_hydro_20
HORVU.MOREX.r2.1HG0021720	0.0783369	0.043839	0.413974	0.0564769	- && Q8VZ17.2 RecName: Full=Histone-lysine N-methyltransferase, H3 lysine-9 specific SUVH6; AltName: Full=Histone H3-K9 methyltransferase 6; Short=H3-K9-HMTase 6; AltName: Full=Protein SET DOMAIN GROUP 23; AltName: Full=Suppressor of variegation 3-9 homol	Pre-SET
HORVU.MOREX.r2.1HG0000870	70.9675	113.087	42.9839	119.935	- && Q9C8L2.1 RecName: Full=Fatty-acid-binding protein 3, chloroplastic; Short=AtFAP3; AltName: Full=Chalcone-flavanone isomerase family protein 3; Flags: Precursor && PF02431:Chalcone-flavanone isomerase	-
HORVU.MOREX.r2.2HG0101550	0.0972216	0.675556	0.00810204	0.590403	- && Q9SA52.1 RecName: Full=Chloroplast stem-loop binding protein of 41 kDa b, chloroplastic; Short=CSP41-b; AltName: Full=Heteroglycan-interacting protein 1.3; AltName: Full=Protein CHLOROPLAST RNA BINDING; AltName: Full=Protein Gb5f; Flags: Precursor &&	Epimerase
HORVU.MOREX.r2.3HG0226390	9.36605	6.12215	16.5006	4.70689	- && P25848.3 RecName: Full=Light-sensor Protein kinase; Includes: RecName: Full=Phytochrome; Includes: RecName: Full=Protein kinase && PF07714:Protein tyrosine kinase|PF06760:Protein of unknown function (DUF1221)	Pkinase_Tyr
HORVU.MOREX.r2.5HG0438820	67.7293	24.41	122.579	25.2485	- && Q8W2B7.1 RecName: Full=DIMBOA UDP-glucosyltransferase BX8; AltName: Full=2,4-dihydroxy-7-methoxy-2H-1,4-benzoxazin-3(4H)-one 2-D-glucosyltransferase BX8; AltName: Full=Protein BENZOXAZINLESS 8 && PF00201:UDP-glucoronosyl and UDP-glucosyl transferase	UDPGT
HORVU.MOREX.r2.6HG0526180	10.6378	5.39245	8.23987	2.95534	- && Q9SXD5.2 RecName: Full=Flavin-containing monooxygenase FMO GS-OX-like 3; AltName: Full=Flavin-monooxygenase glucosinolate S-oxygenase-like 3 && PF00743:Flavin-binding monooxygenase-like	FMO-like
HORVU.MOREX.r2.2HG0178030	9.29722	7.28242	37.2514	7.5843	- && Q9SMT7.1 RecName: Full=Oxalate--CoA ligase; AltName: Full=4-coumarate--CoA ligase isoform 8; Short=At4CL8; AltName: Full=4-coumarate--CoA ligase-like 10; AltName: Full=Acyl-activating enzyme 3; AltName: Full=Adenosine monophosphate binding protein 3;	AMP-binding
HORVU.MOREX.r2.7HG0591070	1.00461	2.30334	0.438362	2.06519	- && D2WL32.1 RecName: Full=1,4-alpha-glucan-branching enzyme 3, chloroplastic/amyloplastic; Short=AtSBE III; AltName: Full=Branching enzyme 1; Short=AtBE1; AltName: Full=Protein EMBRYO DEFECTIVE 2729; AltName: Full=Starch-branching enzyme 3; Flags: Precu	-
HORVU.MOREX.r2.5HG0388980	52.5206	34.9461	81.596	31.3256	- && P73627.1 RecName: Full=Uncharacterized protein sll1770 && PF03109:ABC1 family	ABC1
HORVU.MOREX.r2.1HG0072360	14.1519	24.7094	13.3833	30.3256	- && Q5BLD8.1 RecName: Full=Protein N-lysine methyltransferase METTL21A; AltName: Full=Methyltransferase-like protein 21A && PF10294:Lysine methyltransferase	-
novel.643	0.894281	2.68731	0.666245	3.94312	- && - && -	-
HORVU.MOREX.r2.2HG0136730	0.998812	1.81305	0.784699	2.53516	- && Q9LFA2.1 RecName: Full=Serine/threonine-protein kinase KIPK1; AltName: Full=KCBP-interacting protein kinase && PF00069:Protein kinase domain	Pkinase
HORVU.MOREX.r2.2HG0144360	40.6381	22.9329	71.3702	21.5527	- && - && -	-
HORVU.MOREX.r2.5HG0406490	2.56985	0.755172	6.83652	0.973546	- && Q9LPS9.1 RecName: Full=Pirin-like protein At1g50590 && PF02678:Pirin|PF05726:Pirin C-terminal cupin domain	-
HORVU.MOREX.r2.4HG0296990	7.43721	25.0586	9.27488	28.9213	- && - && -	-
HORVU.MOREX.r2.5HG0384420	15.3074	1.81501	35.0459	5.58427	- && - && -	-
HORVU.MOREX.r2.2HG0100760	116.079	60.9692	177.673	50.3595	- && - && -	-
HORVU.MOREX.r2.5HG0412430	50.5651	17.5673	131.84	24.8574	- && Q9C7Z9.2 RecName: Full=Serine carboxypeptidase-like 18; Flags: Precursor && PF00450:Serine carboxypeptidase	Peptidase_S10
HORVU.MOREX.r2.6HG0488330	85.4861	141.763	44.9594	222.674	- && Q9XI73.1 RecName: Full=Photosynthetic NDH subunit of lumenal location 2, chloroplastic; AltName: Full=PsbQ-like protein 1; Flags: Precursor && PF05757:Oxygen evolving enhancer protein 3 (PsbQ)	-
HORVU.MOREX.r2.7HG0605420	15.5243	10.6009	32.5183	10.7291	- && O65479.2 RecName: Full=Putative cysteine-rich receptor-like protein kinase 20; Short=Cysteine-rich RLK20; Flags: Precursor && PF00069:Protein kinase domain	Pkinase
HORVU.MOREX.r2.2HG0139710	12.4854	18.1577	6.15702	20.7131	- && Q8VY52.1 RecName: Full=PsbP domain-containing protein 2, chloroplastic; AltName: Full=PsbP-related thylakoid lumenal protein 3; Flags: Precursor && PF01789:PsbP	-
HORVU.MOREX.r2.5HG0429370	2035.88	3451.22	1378	4251.62	- && Q10CE4.1 RecName: Full=Peroxisomal (S)-2-hydroxy-acid oxidase GLO1; AltName: Full=Glycolate oxidase 1; Short=GOX 1; Short=OsGLO1; AltName: Full=Short chain alpha-hydroxy acid oxidase GLO1 >B8AKX6.1 RecName: Full=Peroxisomal (S)-2-hydroxy-acid oxidase	FMN_dh
HORVU.MOREX.r2.4HG0289280	6.60094	1.354	10.4382	2.53386	- && Q766C2.1 RecName: Full=Aspartic proteinase nepenthesin-2; AltName: Full=Nepenthesin-II; Flags: Precursor && PF14543:Xylanase inhibitor N-terminal|PF14541:Xylanase inhibitor C-terminal	-
HORVU.MOREX.r2.4HG0286120	15.9014	19.1514	7.99617	19.5866	- && P0A9T4.1 RecName: Full=Protein tas >P0A9T5.1 RecName: Full=Protein tas && PF00248:Aldo/keto reductase family	Aldo_ket_red
HORVU.MOREX.r2.2HG0172630	51.4624	23.4397	87.6073	24.7303	- && Q9C5E5.1 RecName: Full=Diacylglycerol kinase 5; Short=AtDGK5; Short=DAG kinase 5; AltName: Full=Diglyceride kinase 5; Short=DGK 5 && PF00609:Diacylglycerol kinase accessory domain|PF00781:Diacylglycerol kinase catalytic domain	-
HORVU.MOREX.r2.5HG0438470	30.2218	46.6392	16.8985	50.6901	- && A5VJE8.1 RecName: Full=Chaperone protein DnaJ >B2G6W4.1 RecName: Full=Chaperone protein DnaJ && PF00226:DnaJ domain	DnaJ
HORVU.MOREX.r2.2HG0140030	1.07642	0.051034	1.20561	0	- && Q8GWK6.1 RecName: Full=NAC domain-containing protein 104; Short=ANAC104; AltName: Full=Protein XYLEM NAC DOMAIN 1 && PF02365:No apical meristem (NAM) protein	NAM
HORVU.MOREX.r2.3HG0234740	2.98982	1.20521	5.45445	0.886168	- && Q9SPV4.1 RecName: Full=Salicylate carboxymethyltransferase; AltName: Full=S-adenosyl-L-methionine:salicylate acid carboxylmethyltransferase; Short=CbSAMT; AltName: Full=Salicylate O-methyltransferase && PF03492:SAM dependent carboxyl methyltransferas	-
HORVU.MOREX.r2.5HG0385400	1.07467	0.332044	1.79164	0.410786	- && Q8VZG8.3 RecName: Full=MDIS1-interacting receptor like kinase 2; Short=AtMIK2; AltName: Full=Probable LRR receptor-like serine/threonine-protein kinase At4g08850; Flags: Precursor && PF13855:Leucine rich repeat|PF00069:Protein kinase domain|PF08263:L	Pkinase
HORVU.MOREX.r2.1HG0007410	11.3918	3.97066	30.8406	6.42202	- && - && PF14368:Probable lipid transfer	-
HORVU.MOREX.r2.1HG0036990	0.0393063	1.77362	0	1.86032	- && - && -	-
HORVU.MOREX.r2.4HG0342490	106.156	61.4289	185.536	34.3482	- && Q02166.1 RecName: Full=Anthranilate phosphoribosyltransferase, chloroplastic; Flags: Precursor && PF02885:Glycosyl transferase family, helical bundle domain|PF00591:Glycosyl transferase family, a/b domain	Glycos_trans_3N
HORVU.MOREX.r2.1HG0056100	92.4398	138.939	61.3458	157.639	- && - && -	-
HORVU.MOREX.r2.2HG0175120	35.0308	27.8062	62.7929	24.7259	- && Q9FFE6.1 RecName: Full=Probable acyl-activating enzyme 5, peroxisomal; AltName: Full=AMP-binding protein 5; Short=AtAMPBP5 && PF00501:AMP-binding enzyme|PF13193:AMP-binding enzyme C-terminal domain	AMP-binding
HORVU.MOREX.r2.4HG0295870	3.13535	3.6741	0.911784	3.22872	- && P52711.1 RecName: Full=Serine carboxypeptidase II-3; AltName: Full=CP-MII.3; Contains: RecName: Full=Serine carboxypeptidase II-3 chain A; Contains: RecName: Full=Serine carboxypeptidase II-3 chain B; Flags: Precursor && PF00450:Serine carboxypeptida	Peptidase_S10
HORVU.MOREX.r2.7HG0556560	5.75092	2.19176	14.9401	1.45114	- && P60496.1 RecName: Full=Chemocyanin; AltName: Full=Basic blue protein; AltName: Full=Plantacyanin; Flags: Precursor && PF02298:Plastocyanin-like domain	Cu_bind_like
HORVU.MOREX.r2.2HG0177070	0.392533	0.872625	0.322075	2.39787	- && Q94F40.1 RecName: Full=GDSL esterase/lipase At1g28600; AltName: Full=Extracellular lipase At1g28600; Flags: Precursor && PF00657:GDSL-like Lipase/Acylhydrolase	Lipase_GDSL
HORVU.MOREX.r2.3HG0273300	10.9153	15.2464	6.57806	17.2808	- && Q0JFN7.2 RecName: Full=DEAD-box ATP-dependent RNA helicase 58, chloroplastic; Flags: Precursor && PF00270:DEAD/DEAH box helicase|PF00271:Helicase conserved C-terminal domain	DEAD
HORVU.MOREX.r2.3HG0237240	13.6471	8.66408	34.1161	7.97413	- && Q8S2E5.1 RecName: Full=Ribose-phosphate pyrophosphokinase 3, chloroplastic; AltName: Full=Phosphoribosyl pyrophosphate synthase 3; Flags: Precursor && PF00156:Phosphoribosyl transferase domain	Pribosyltran
HORVU.MOREX.r2.2HG0079040	25.3478	9.53072	44.6167	13.8844	- && Q7G764.1 RecName: Full=Probable NAD(P)H-dependent oxidoreductase 1 && PF00248:Aldo/keto reductase family	Aldo_ket_red
HORVU.MOREX.r2.6HG0526860	33.5984	56.756	15.286	52.2788	- && Q9SJU9.2 RecName: Full=Epimerase family protein SDR39U1 homolog, chloroplastic; AltName: Full=Protein GIANT CHLOROPLAST 1; AltName: Full=Protein SulA homolog; Short=AtSulA; Flags: Precursor && PF01370:NAD dependent epimerase/dehydratase family|PF0833	Epimerase
HORVU.MOREX.r2.3HG0253930	0.841733	0.427027	1.96463	0.418613	- && Q9FGR9.1 RecName: Full=KDEL-tailed cysteine endopeptidase CEP1; AltName: Full=Cysteine proteinase CP56; Short=AtCP56; Flags: Precursor && PF08246:Cathepsin propeptide inhibitor domain (I29)|PF00112:Papain family cysteine protease	Peptidase_C1
HORVU.MOREX.r2.7HG0592780	0	0.259949	0	0.563505	- && Q69UE6.1 RecName: Full=Acyl transferase 10; Short=OsAT10 && PF02458:Transferase family	-
HORVU.MOREX.r2.2HG0159490	5.48885	2.96539	12.3713	3.99089	- && - && PF02485:Core-2/I-Branching enzyme	-
HORVU.MOREX.r2.6HG0520220	60.6733	89.9976	41.3808	90.5642	- && - && -	-
HORVU.MOREX.r2.3HG0221290	15.8517	12.2998	30.0244	10.9541	- && Q54MZ4.1 RecName: Full=Mitochondrial substrate carrier family protein B && PF00153:Mitochondrial carrier protein	Mito_carr
HORVU.MOREX.r2.5HG0363920	5.84682	11.5442	3.74555	11.7019	- && Q9LD07.1 RecName: Full=Expansin-B7; AltName: Full=Beta-expansin-7; AltName: Full=OsEXPB7; AltName: Full=OsaEXPb1.12; Flags: Precursor && PF01357:Pollen allergen|PF03330:Rare lipoprotein A (RlpA)-like double-psi beta-barrel	-
HORVU.MOREX.r2.6HG0456060	19.1573	7.23267	33.704	6.45999	- && - && -	-
HORVU.MOREX.r2.7HG0619720	11.4811	4.4312	48.1287	9.33976	- && Q8GUH1.2 RecName: Full=U-box domain-containing protein 33; AltName: Full=Plant U-box protein 33; Includes: RecName: Full=E3 ubiquitin ligase; Includes: RecName: Full=Serine/threonine-protein kinase && PF00069:Protein kinase domain	Pkinase
HORVU.MOREX.r2.5HG0407400	164.236	33.1787	313.393	51.1748	- && - && -	-
HORVU.MOREX.r2.7HG0622090	3.81317	2.30886	12.3253	2.93463	- && Q96S90.1 RecName: Full=LysM and putative peptidoglycan-binding domain-containing protein 1 && -	-
HORVU.MOREX.r2.2HG0167340	43.1736	32.6451	84.2101	33.7556	- && Q02066.1 RecName: Full=Abscisic acid-inducible protein kinase && PF00069:Protein kinase domain	Pkinase
HORVU.MOREX.r2.3HG0253050	32.2618	15.1769	44.4577	16.4251	- && A2CIR5.1 RecName: Full=Ankyrin repeat-containing protein NPR4; Short=OsNPR4 && PF12796:Ankyrin repeats (3 copies)|PF13637:Ankyrin repeats (many copies)|PF13962:Domain of unknown function	-
HORVU.MOREX.r2.5HG0388290	10236.3	13703.4	4028.51	13650	- && Q40004.1 RecName: Full=Ribulose bisphosphate carboxylase small chain, chloroplastic; Short=RuBisCO small subunit; Flags: Precursor && PF00101:Ribulose bisphosphate carboxylase, small chain|PF12338:Ribulose-1,5-bisphosphate carboxylase small subunit	-
HORVU.MOREX.r2.3HG0254770	30.394	78.5358	14.9465	74.2801	- && F4JF21.1 RecName: Full=Protein PLASTID TRANSCRIPTIONALLY ACTIVE 10; Short=pTAC10; AltName: Full=Plastid-encoded RNA polymerase-associated protein 3; Short=PEP-associated protein 3; AltName: Full=Protein PIGMENT DEFECTIVE 312; Flags: Precursor && -	-
HORVU.MOREX.r2.1HG0039540	9.29926	5.10875	14.8886	5.44397	- && - && -	-
HORVU.MOREX.r2.2HG0176700	1.48971	2.50676	0.711757	2.86928	- && P11849.2 RecName: Full=Photosystem II D2 protein; Short=PSII D2 protein; AltName: Full=Photosystem Q(A) protein >A1E9Z3.1 RecName: Full=Photosystem II D2 protein; Short=PSII D2 protein; AltName: Full=Photosystem Q(A) protein && PF00124:Photosynthetic	Photo_RC
HORVU.MOREX.r2.7HG0551320	1.97098	2.27021	1.10541	6.30777	- && - && PF05553:Cotton fibre expressed protein	-
HORVU.MOREX.r2.1HG0054290	0.0682391	0	0.603863	0	- && Q9SN22.1 RecName: Full=Scarecrow-like protein 32; Short=AtSCL32; AltName: Full=GRAS family protein 18; Short=AtGRAS-18 && PF03514:GRAS domain family	GRAS
HORVU.MOREX.r2.5HG0439370	5.62893	8.58731	2.66789	6.3424	- && - && -	-
HORVU.MOREX.r2.3HG0212610	5.72752	7.77621	2.88517	7.89877	- && - && -	-
HORVU.MOREX.r2.6HG0462060	295.807	467.536	141.024	499.473	- && O80360.1 RecName: Full=50S ribosomal protein L3, chloroplastic; Flags: Precursor && PF00297:Ribosomal protein L3	-
HORVU.MOREX.r2.4HG0323430	11.159	18.4601	5.49344	25.1795	- && O22056.2 RecName: Full=RNA polymerase sigma factor sigB; Short=Sigma factor B; Short=Sigma-B; AltName: Full=Protein ABERRANT CHLOROPLAST 1; AltName: Full=RNA polymerase sigma factor sig1; Short=Atsig1; Short=Sigma factor 1; AltName: Full=RNA polymera	Sigma70_r4
HORVU.MOREX.r2.4HG0311790	90.2096	146.814	49.2549	150.348	- && - && PF02536:mTERF	-
HORVU.MOREX.r2.7HG0588580	7.23161	1.35576	14.1437	2.27657	- && O64763.1 RecName: Full=E3 ubiquitin-protein ligase ATL9; AltName: Full=RING-H2 finger protein ATL9; AltName: Full=RING-type E3 ubiquitin transferase ATL9; Flags: Precursor && PF13639:Ring finger domain	-
HORVU.MOREX.r2.5HG0404140	19.8779	10.8445	33.8399	11.3321	- && - && -	-
HORVU.MOREX.r2.3HG0195930	4.34057	1.22586	8.78024	2.04324	- && - && -	-
HORVU.MOREX.r2.4HG0315870	29.3861	20.7762	87.7939	26.772	- && Q9FLR3.1 RecName: Full=NAC domain-containing protein 79; Short=ANAC79; Short=ANAC80; Short=AtNAC79; Short=AtNAC80 && PF02365:No apical meristem (NAM) protein	NAM
HORVU.MOREX.r2.7HG0611150	51.1009	25.2132	101.902	25.0091	- && Q700D9.2 RecName: Full=Putative Myb family transcription factor At1g14600 && PF00249:Myb-like DNA-binding domain	Myb_DNA-binding
HORVU.MOREX.r2.4HG0278060	6.77418	10.2729	1.59822	10.113	- && - && PF07911:Protein of unknown function (DUF1677)	-
HORVU.MOREX.r2.6HG0504810	13.6659	20.2305	8.21388	20.2214	- && Q6DYE4.1 RecName: Full=Uncharacterized protein At1g26090, chloroplastic; Flags: Precursor && PF02374:Anion-transporting ATPase	-
HORVU.MOREX.r2.1HG0004550	1.86499	0.681559	3.39266	0.552392	- && Q9LMN7.1 RecName: Full=Wall-associated receptor kinase 5; Flags: Precursor && PF07645:Calcium-binding EGF domain|PF00069:Protein kinase domain|PF13947:Wall-associated receptor kinase galacturonan-binding	Pkinase
HORVU.MOREX.r2.3HG0225010	7.77534	13.0122	5.36136	14.4015	- && P53980.1 RecName: Full=Uncharacterized protein YNL011C && PF01933:Uncharacterised protein family UPF0052	-
HORVU.MOREX.r2.5HG0400010	7.43966	10.1049	3.74379	13.4768	- && O65567.2 RecName: Full=Pentatricopeptide repeat-containing protein At4g30825, chloroplastic; Flags: Precursor && PF13041:PPR repeat family	-
HORVU.MOREX.r2.3HG0260630	136.368	90.5547	258.744	86.1353	- && A8KYS5.1 RecName: Full=Transaldolase && PF00923:Transaldolase	-
HORVU.MOREX.r2.3HG0192120	8.84178	2.6134	21.9194	3.65235	- && Q9C7K0.1 RecName: Full=F-box protein VBF; AltName: Full=Protein PHLOEM PROTEIN 2-LIKE B14; Short=AtPP2-B14; AltName: Full=VIP1-binding F-box protein && PF14299:Phloem protein 2	-
HORVU.MOREX.r2.3HG0184880	7.14667	4.70248	55.6516	12.5229	- && P12940.1 RecName: Full=Bowman-Birk type trypsin inhibitor && PF00228:Bowman-Birk serine protease inhibitor family	-
HORVU.MOREX.r2.4HG0289260	14.7664	4.78159	29.1038	7.84506	- && - && -	-
HORVU.MOREX.r2.2HG0115420	179.622	294.784	89.5555	376.915	- && A2YLX7.1 RecName: Full=Protein LHCP TRANSLOCATION DEFECT; Flags: Precursor >A3BKF2.1 RecName: Full=Protein LHCP TRANSLOCATION DEFECT; Flags: Precursor && PF13857:Ankyrin repeats (many copies)	-
HORVU.MOREX.r2.3HG0195620	3.43375	1.78486	10.3343	2.27245	- && O80939.1 RecName: Full=L-type lectin-domain containing receptor kinase IV.1; Short=Arabidopsis thaliana lectin-receptor kinase e; Short=AthlecRK-e; Short=LecRK-IV.1; AltName: Full=Lectin Receptor Kinase 1; Flags: Precursor && PF00139:Legume lectin do	Pkinase
HORVU.MOREX.r2.6HG0494260	12.1659	7.59072	23.7849	7.75053	- && Q8GWB7.1 RecName: Full=Inositol phosphorylceramide glucuronosyltransferase 1; AltName: Full=Glycogenin-like protein 6; AltName: Full=Plant glycogenin-like starch initiation protein 6 && PF01501:Glycosyl transferase family 8	Glyco_transf_8
HORVU.MOREX.r2.2HG0177710	11.8827	4.05941	37.31	6.40825	- && Q9SR44.1 RecName: Full=Lysine histidine transporter-like 2 && PF01490:Transmembrane amino acid transporter protein	Aa_trans
HORVU.MOREX.r2.1HG0075950	0	2.78336	0.0237864	1.99304	- && - && -	-
HORVU.MOREX.r2.3HG0196280	3.49079	3.03038	9.00465	2.80858	- && O23969.1 RecName: Full=Pollen-specific protein SF21 && PF03096:Ndr family	Ndr
novel.243	0.467786	0.0921687	1.48107	0.0430084	- && - && -	-
HORVU.MOREX.r2.2HG0108330	0.0704492	0.00499844	0.50756	0.036682	- && - && PF11145:Protein of unknown function (DUF2921)	-
HORVU.MOREX.r2.1HG0062100	19.7437	8.59369	30.3172	6.35472	- && Q9STT5.2 RecName: Full=ABC transporter A family member 7; Short=ABC transporter ABCA.7; Short=AtABCA7; AltName: Full=Probable ABC2 homolog 6 && PF00005:ABC transporter|PF12698:ABC-2 family transporter protein	ABC_tran
HORVU.MOREX.r2.5HG0421160	626.287	1082.3	391.2	1239.3	- && P19683.1 RecName: Full=31 kDa ribonucleoprotein, chloroplastic; Flags: Precursor && PF00076:RNA recognition motif. (a.k.a. RRM, RBD, or RNP domain)	RRM_1
HORVU.MOREX.r2.1HG0019930	2.68744	1.60817	7.97504	1.89053	- && - && -	-
HORVU.MOREX.r2.1HG0007560	4.21293	0.552344	7.56563	1.22674	- && - && -	-
HORVU.MOREX.r2.3HG0271320	36.712	6.86263	43.9154	11.1527	- && - && PF02496:ABA/WDS induced protein	-
HORVU.MOREX.r2.5HG0438910	7.20236	2.75703	9.14143	2.28941	- && Q9M643.1 RecName: Full=Cycloeucalenol cycloisomerase; AltName: Full=Cycloeucalenol--obtusifoliol isomerase; AltName: Full=Cyclopropyl sterol isomerase && -	-
HORVU.MOREX.r2.4HG0288200	26.9162	37.4132	12.6744	36.3661	- && - && PF02190:ATP-dependent protease La (LON) substrate-binding domain	-
HORVU.MOREX.r2.3HG0192130	1.58404	0.0967314	4.62705	0.29501	- && - && PF13966:zinc-binding in reverse transcriptase	-
HORVU.MOREX.r2.1HG0070100	100.126	32.0814	237.895	41.8425	- && - && -	-
HORVU.MOREX.r2.2HG0172600	16.4189	9.19172	21.2047	9.42318	- && O81905.1 RecName: Full=Receptor-like serine/threonine-protein kinase SD1-8; AltName: Full=Arabidopsis thaliana receptor kinase 3; AltName: Full=S-domain-1 (SD1) receptor kinase 8; Short=SD1-8; Flags: Precursor && PF01453:D-mannose binding lectin|PF00	Pkinase
HORVU.MOREX.r2.2HG0163510	26.18	11.4084	43.6273	10.9538	- && Q8S8S9.1 RecName: Full=Methylesterase 1; Short=AtMES1 && PF12697:Alpha/beta hydrolase family	-
HORVU.MOREX.r2.3HG0249310	11.6962	9.23772	19.1474	7.84272	- && Q0WP01.1 RecName: Full=Protein NRT1/ PTR FAMILY 5.10; Short=AtNPF5.10 && PF00854:POT family	-
HORVU.MOREX.r2.3HG0260790	156.761	69.2801	251.616	72.3229	- && Q9UU99.1 RecName: Full=CRAL-TRIO domain-containing protein C23B6.04c && PF00650:CRAL/TRIO domain	-
HORVU.MOREX.r2.3HG0256630	1.79054	3.6684	1.26136	4.75492	- && O04086.1 RecName: Full=Probable receptor-like protein kinase At1g11050; Flags: Precursor && PF00069:Protein kinase domain	Pkinase
HORVU.MOREX.r2.2HG0114340	18.8072	9.70587	35.1741	13.6226	- && Q0D5R3.1 RecName: Full=Cysteine-rich receptor-like protein kinase 6; Short=Cysteine-rich RLK6; Flags: Precursor && PF01657:Salt stress response/antifungal|PF07714:Protein tyrosine kinase	Pkinase_Tyr
HORVU.MOREX.r2.2HG0148740	4.04411	2.79396	9.81611	2.72541	- && Q9LDG2.1 RecName: Full=Protein trichome birefringence-like 10 && PF13839:GDSL/SGNH-like Acyl-Esterase family found in Pmr5 and Cas1p|PF14416:PMR5 N terminal Domain	-
HORVU.MOREX.r2.2HG0154990	20.6029	34.5229	19.4742	44.8165	- && Q9ZPH9.1 RecName: Full=Probable methyltransferase PMT15 && PF03141:Putative S-adenosyl-L-methionine-dependent methyltransferase	-
HORVU.MOREX.r2.7HG0551600	1.01162	0.479686	3.3741	0.638301	- && Q67X83.1 RecName: Full=26.2 kDa heat shock protein, mitochondrial; Short=OsHsp26.2; Flags: Precursor && PF00011:Hsp20/alpha crystallin family	-
HORVU.MOREX.r2.1HG0017880	10.5167	12.4824	3.55308	13.4337	- && Q84J88.1 RecName: Full=Heavy metal-associated isoprenylated plant protein 36; Short=AtHIP36; Flags: Precursor && PF00403:Heavy-metal-associated domain	HMA
HORVU.MOREX.r2.3HG0209790	128.064	217.215	55.5216	199.043	- && - && -	-
HORVU.MOREX.r2.2HG0176740	0.225533	2.38434	0.106885	2.62154	- && - && -	-
HORVU.MOREX.r2.5HG0381530	18.0385	34.7931	11.2094	37.4983	- && Q4V3D9.1 RecName: Full=Protein STRICTOSIDINE SYNTHASE-LIKE 10; Short=AtSSL10; AltName: Full=Strictosidine synthase 8; Short=AtSS8; Flags: Precursor && PF03088:Strictosidine synthase	Str_synth
HORVU.MOREX.r2.1HG0042250	85.0072	125.757	49.8013	127.88	- && - && PF05899:Protein of unknown function (DUF861)	Cupin_3
HORVU.MOREX.r2.7HG0595400	0.780861	0.0620505	3.5557	0.504271	- && Q9C7N4.1 RecName: Full=GDSL esterase/lipase At1g29670; AltName: Full=Extracellular lipase At1g29670; Flags: Precursor && PF00657:GDSL-like Lipase/Acylhydrolase	Lipase_GDSL
HORVU.MOREX.r2.3HG0182560	78.409	21.2775	90.1703	24.8743	- && Q9LMP1.1 RecName: Full=Wall-associated receptor kinase 2; Flags: Precursor && PF07714:Protein tyrosine kinase|PF07645:Calcium-binding EGF domain|PF13947:Wall-associated receptor kinase galacturonan-binding	Pkinase_Tyr
HORVU.MOREX.r2.5HG0426510	11.5334	28.9076	7.75414	35.2655	- && Q75KA9.1 RecName: Full=Cytochrome c biogenesis protein CCS1, chloroplastic; AltName: Full=C-type cytochrome synthesis protein 1; Flags: Precursor && PF05140:ResB-like family	-
HORVU.MOREX.r2.4HG0307240	257.539	400.526	123.881	443.697	- && P93014.1 RecName: Full=30S ribosomal protein S5, chloroplastic; Flags: Precursor && PF00333:Ribosomal protein S5, N-terminal domain|PF03719:Ribosomal protein S5, C-terminal domain	-
HORVU.MOREX.r2.2HG0160090	0.907015	1.75884	0.496446	2.18704	- && Q9LIE7.1 RecName: Full=Pentatricopeptide repeat-containing protein At3g22150, chloroplastic; Flags: Precursor && PF13041:PPR repeat family	-
HORVU.MOREX.r2.6HG0486140	1.95102	5.2212	0.994577	5.1684	- && - && PF00385:Chromo (CHRromatin Organisation MOdifier) domain	Chromo
HORVU.MOREX.r2.1HG0074900	1.95581	0.799635	5.39855	1.23823	- && Q7XJJ7.1 RecName: Full=Fatty acid amide hydrolase; AltName: Full=N-acylethanolamine amidohydrolase && PF01425:Amidase	Amidase
HORVU.MOREX.r2.4HG0279880	664.235	1242.56	454.959	1237.09	- && - && PF14861:Plant antimicrobial peptide	-
HORVU.MOREX.r2.6HG0496060	46.3872	23.0319	52.3682	23.5361	- && Q9M2Z4.1 RecName: Full=Membrane steroid-binding protein 2; Short=AtMP2; AltName: Full=Membrane-associated progesterone-binding protein 3; Short=AtMAPR3 && PF00173:Cytochrome b5-like Heme/Steroid binding domain	-
HORVU.MOREX.r2.6HG0509770	19.5536	10.3933	27.1447	8.73764	- && Q94AI6.1 RecName: Full=Exocyst complex component SEC6; Short=AtSec6 && PF06046:Exocyst complex component Sec6	-
HORVU.MOREX.r2.7HG0583590	212.451	80.7141	354.686	110.312	- && Q9FKS8.1 RecName: Full=Lysine histidine transporter 1 && PF01490:Transmembrane amino acid transporter protein	Aa_trans
HORVU.MOREX.r2.1HG0069840	1.77621	4.86497	1.64011	6.27942	- && - && -	-
HORVU.MOREX.r2.3HG0261230	2.50015	1.00959	3.41807	0.74745	- && Q5JK32.2 RecName: Full=Potassium transporter 5; AltName: Full=OsHAK5 && PF02705:K+ potassium transporter	K_trans
HORVU.MOREX.r2.1HG0043930	17.8525	7.63483	36.416	11.2301	- && Q8GZ84.2 RecName: Full=U-box domain-containing protein 36; AltName: Full=Plant U-box protein 36 && -	-
HORVU.MOREX.r2.2HG0176030	42.2971	24.4268	73.8231	27.4347	- && Q7XR47.1 RecName: Full=Probable adenylate kinase 6, chloroplastic; AltName: Full=Adenylate monophosphate kinase 6; Flags: Precursor && PF00406:Adenylate kinase	ADK
HORVU.MOREX.r2.2HG0105860	5.28765	9.61958	2.02668	7.12941	- && Q8L608.1 RecName: Full=Heparanase-like protein 2; Flags: Precursor && PF03662:Glycosyl hydrolase family 79, N-terminal domain	-
HORVU.MOREX.r2.5HG0407090	19.0423	8.71844	27.8853	12.5327	- && Q9S9N9.1 RecName: Full=Cinnamoyl-CoA reductase 1; Short=AtCCR1; AltName: Full=Protein IRREGULAR XYLEM 4 && PF01370:NAD dependent epimerase/dehydratase family	Epimerase
HORVU.MOREX.r2.5HG0392470	27.8827	17.2962	48.1109	12.8409	- && Q9FJH0.1 RecName: Full=Ras-related protein RABA1f; Short=AtRABA1f && PF00071:Ras family	Ras
HORVU.MOREX.r2.3HG0224000	2.10398	0.292894	6.65194	1.14487	- && Q8VZG2.1 RecName: Full=Protein HYPER-SENSITIVITY-RELATED 4; Short=AtHSR4; AltName: Full=BCS1-like protein && PF14363:Domain associated at C-terminal with AAA|PF00004:ATPase family associated with various cellular activities (AAA)	AAA
HORVU.MOREX.r2.2HG0158630	22.224	8.39127	52.392	15.3256	- && Q8L7E3.2 RecName: Full=Vacuolar-sorting receptor 7; Short=AtVSR7; AltName: Full=BP80-like protein f; Short=AtBP80f; AltName: Full=Epidermal growth factor receptor-like protein 3; Short=AtELP3; Flags: Precursor && PF02225:PA domain|PF12662:Complement	-
HORVU.MOREX.r2.2HG0137850	481.261	692.353	344.595	807.288	- && Q6ER94.1 RecName: Full=2-Cys peroxiredoxin BAS1, chloroplastic; AltName: Full=Thiol-specific antioxidant protein; Flags: Precursor && PF00578:AhpC/TSA family|PF10417:C-terminal domain of 1-Cys peroxiredoxin	-
HORVU.MOREX.r2.1HG0001160	74.6557	23.9859	103.581	29.9564	- && Q0D5R3.1 RecName: Full=Cysteine-rich receptor-like protein kinase 6; Short=Cysteine-rich RLK6; Flags: Precursor && PF07714:Protein tyrosine kinase|PF01657:Salt stress response/antifungal	Pkinase_Tyr
HORVU.MOREX.r2.6HG0457770	7.13749	3.46992	11.7566	4.15411	- && O64477.1 RecName: Full=G-type lectin S-receptor-like serine/threonine-protein kinase At2g19130; Flags: Precursor && PF01453:D-mannose binding lectin|PF08276:PAN-like domain|PF00954:S-locus glycoprotein domain|PF00069:Protein kinase domain	Pkinase
HORVU.MOREX.r2.2HG0152220	10.5936	18.0861	5.27878	16.1115	- && O80939.1 RecName: Full=L-type lectin-domain containing receptor kinase IV.1; Short=Arabidopsis thaliana lectin-receptor kinase e; Short=AthlecRK-e; Short=LecRK-IV.1; AltName: Full=Lectin Receptor Kinase 1; Flags: Precursor && PF00069:Protein kinase d	Pkinase
HORVU.MOREX.r2.1HG0039810	1.47491	3.17306	0.519303	3.6488	- && Q337A5.1 RecName: Full=Actin-depolymerizing factor 10; Short=ADF-10; Short=OsADF10 && PF00241:Cofilin/tropomyosin-type actin-binding protein	Cofilin_ADF
HORVU.MOREX.r2.4HG0294950	0.174061	0.601778	0.0308051	0.554891	- && Q10LZ9.1 RecName: Full=Zinc finger CCCH domain-containing protein 23; Short=OsC3H23 && PF16131:Torus domain	-
HORVU.MOREX.r2.2HG0098130	7.46163	19.5466	3.78499	20.2167	- && Q940G6.1 RecName: Full=Gibberellin receptor GID1C; AltName: Full=AtCXE19; AltName: Full=Carboxylesterase 19; AltName: Full=GID1-like protein 3; AltName: Full=Protein GA INSENSITIVE DWARF 1C; Short=AtGID1C && PF07859:alpha/beta hydrolase fold	Abhydrolase_3
HORVU.MOREX.r2.7HG0608800	130.168	53.7078	443.168	120.941	- && Q8LC95.2 RecName: Full=Early nodulin-like protein 3; AltName: Full=Phytocyanin-like protein; Flags: Precursor && PF02298:Plastocyanin-like domain	Cu_bind_like
novel.1239	0	0.962803	0	1.19281	- && - && -	-
HORVU.MOREX.r2.1HG0066320	77.3836	59.2066	138.413	53.3841	- && Q40255.1 RecName: Full=Probable aldehyde dehydrogenase; AltName: Full=Flax-inducible sequence 1 && PF00171:Aldehyde dehydrogenase family	Aldedh
HORVU.MOREX.r2.4HG0329010	0.0720955	0	1.96285	0.0325811	- && P14895.1 RecName: Full=High molecular mass early light-inducible protein HV58, chloroplastic; Short=ELIP; Flags: Precursor && PF00504:Chlorophyll A-B binding protein	-
HORVU.MOREX.r2.6HG0479210	2.58181	7.17168	3.31196	9.54534	- && O24646.1 RecName: Full=Transcription factor HY5; AltName: Full=Protein LONG HYPOCOTYL 5; AltName: Full=bZIP transcription factor 56; Short=AtbZIP56 && PF00170:bZIP transcription factor	bZIP_1
HORVU.MOREX.r2.4HG0303280	64.3689	39.1046	104.137	37.416	- && P19515.2 RecName: Full=Lipase; AltName: Full=Triacylglycerol lipase; Flags: Precursor && PF01764:Lipase (class 3)	Lipase_3
HORVU.MOREX.r2.6HG0465110	0	2.76631	0	2.12813	- && - && -	-
HORVU.MOREX.r2.3HG0259110	19.785	15.4433	33.16	16.3057	- && Q8GZA4.1 RecName: Full=CBS domain-containing protein CBSX6 && -	-
HORVU.MOREX.r2.1HG0076220	14.4583	17.43	5.33814	12.2833	- && Q0D5R3.1 RecName: Full=Cysteine-rich receptor-like protein kinase 6; Short=Cysteine-rich RLK6; Flags: Precursor && PF00069:Protein kinase domain|PF01657:Salt stress response/antifungal	Pkinase
HORVU.MOREX.r2.5HG0357950	33.0261	15.0192	43.8695	18.3454	- && Q9LXA5.1 RecName: Full=L-type lectin-domain containing receptor kinase IX.1; Short=LecRK-IX.1; Flags: Precursor && PF00069:Protein kinase domain	Pkinase
HORVU.MOREX.r2.3HG0259250	6.73208	2.64939	11.1208	1.91772	- && Q3E6Y3.1 RecName: Full=Uncharacterized protein At1g28695; Flags: Precursor && PF03407:Nucleotide-diphospho-sugar transferase	-
HORVU.MOREX.r2.3HG0184570	1.83803	0.697291	3.90352	0.492998	- && Q9LDU0.1 RecName: Full=Metal tolerance protein 7; Short=OsMTP7 && PF16916:Dimerisation domain of Zinc Transporter|PF01545:Cation efflux family	-
HORVU.MOREX.r2.7HG0608660	0.113233	2.11739	0.107924	1.26184	- && - && PF03101:FAR1 DNA-binding domain	FAR1
HORVU.MOREX.r2.5HG0443600	15.9138	9.96157	25.5092	7.87888	- && Q9LK39.1 RecName: Full=Probable acyl-activating enzyme 16, chloroplastic; Flags: Precursor && PF00501:AMP-binding enzyme	AMP-binding
HORVU.MOREX.r2.5HG0406340	95.7402	60.8125	164.214	55.0324	- && - && PF07889:Protein of unknown function (DUF1664)	-
HORVU.MOREX.r2.6HG0454550	0	1.9215	0	1.31969	- && Q9SIT1.1 RecName: Full=Receptor-like kinase TMK3; AltName: Full=BARK1-like kinase 2; AltName: Full=Leucine-rich repeat receptor-like kinases TMK3; AltName: Full=Transmembrane kinase 3; Flags: Precursor && PF00069:Protein kinase domain	Pkinase
HORVU.MOREX.r2.5HG0371060	0.0108523	0.256801	0	0.437589	- && Q6VAA8.1 RecName: Full=UDP-glycosyltransferase 91D1 && PF00201:UDP-glucoronosyl and UDP-glucosyl transferase	UDPGT
HORVU.MOREX.r2.2HG0086050	632.772	843.906	157.092	934.116	- && P00871.2 RecName: Full=Ribulose bisphosphate carboxylase small chain PWS4.3, chloroplastic; Short=RuBisCO small subunit PWS4.3; Flags: Precursor && PF12338:Ribulose-1,5-bisphosphate carboxylase small subunit|PF00101:Ribulose bisphosphate carboxylase,	-
HORVU.MOREX.r2.6HG0510320	175.335	338.857	78.3616	380.53	- && Q8RXS1.1 RecName: Full=Photosynthetic NDH subunit of subcomplex B 4, chloroplastic; Short=Protein PnsB4; AltName: Full=NDH DEPENDENT FLOW 6; AltName: Full=NDH-DEPENDENT CYCLIC ELECTRON FLOW 6; Flags: Precursor && -	-
HORVU.MOREX.r2.5HG0364350	12.9502	2.71333	38.8311	9.6822	- && Q9FLD5.1 RecName: Full=AAA-ATPase ASD, mitochondrial; AltName: Full=AAA-ATPase 1; AltName: Full=Protein ATPASE-IN-SEED-DEVELOPMENT && PF14363:Domain associated at C-terminal with AAA|PF00004:ATPase family associated with various cellular activities (	AAA
HORVU.MOREX.r2.3HG0222470	1.28445	0.290676	4.59596	0.325659	- && Q5ZC82.1 RecName: Full=Cytokinin riboside 5'-monophosphate phosphoribohydrolase LOG; AltName: Full=Protein LONELY GUY && PF03641:Possible lysine decarboxylase	-
HORVU.MOREX.r2.3HG0255980	2.2295	0.884731	6.0168	1.37837	- && O64477.1 RecName: Full=G-type lectin S-receptor-like serine/threonine-protein kinase At2g19130; Flags: Precursor && PF00069:Protein kinase domain|PF01453:D-mannose binding lectin|PF00954:S-locus glycoprotein domain|PF08276:PAN-like domain	Pkinase
HORVU.MOREX.r2.2HG0160350	179.729	296.577	93.7567	316.599	- && Q9C7Y2.1 RecName: Full=Multiple organellar RNA editing factor 5, mitochondrial; AltName: Full=RNA editing-interacting protein 5; Flags: Precursor && -	-
HORVU.MOREX.r2.5HG0350440	4.7853	3.86982	9.78299	3.54766	- && F4IBD7.1 RecName: Full=CSC1-like protein RXW8 && PF13967:Late exocytosis, associated with Golgi transport|PF02714:Calcium-dependent channel, 7TM region, putative phosphate	-
HORVU.MOREX.r2.3HG0234750	18.2634	12.4844	28.9439	13.1918	- && F4IHJ0.1 RecName: Full=Phosphatidylinositol/phosphatidylcholine transfer protein SFH8; AltName: Full=Protein SEC FOURTEEN HOMOLOGS 8; Short=AtSFH8 && PF03765:CRAL/TRIO, N-terminal domain|PF00650:CRAL/TRIO domain	CRAL_TRIO_N
HORVU.MOREX.r2.6HG0500300	32.5506	49.6818	19.9747	47.2132	- && - && PF02186:TFIIE beta subunit core domain	-
HORVU.MOREX.r2.5HG0439680	444.775	61.1492	1761.55	90.2497	- && D9HP26.1 RecName: Full=Cell number regulator 10; AltName: Full=ZmCNR10 && PF04749:PLAC8 family	-
HORVU.MOREX.r2.5HG0383480	0.132228	0.136728	1.39118	0.187937	- && Q8W488.1 RecName: Full=Protein DETOXIFICATION 21; Short=AtDTX21; AltName: Full=Multidrug and toxic compound extrusion protein 21; Short=MATE protein 21 && PF01554:MatE	MatE
HORVU.MOREX.r2.UnG0635760	0.553267	7.08438	0.623673	6.43059	- && A8Y9C1.1 RecName: Full=Translation initiation factor IF-1, chloroplastic && PF01176:Translation initiation factor 1A / IF-1	-
HORVU.MOREX.r2.3HG0233570	3.98474	0.201704	44.6607	1.11532	- && P11955.4 RecName: Full=26 kDa endochitinase 1; Flags: Precursor && PF00187:Chitin recognition protein|PF00182:Chitinase class I	-
HORVU.MOREX.r2.1HG0040480	151.988	111.323	223.987	78.4911	- && Q9FUS8.1 RecName: Full=Glutathione S-transferase U17; Short=AtGSTU17; AltName: Full=GST class-tau member 17; AltName: Full=Glutathione S-transferase 30; AltName: Full=Protein EARLY RESPONSIVE TO DEHYDRATION 9 && PF00043:Glutathione S-transferase, C-t	GST_C
HORVU.MOREX.r2.1HG0031630	18.8023	42.4126	6.96713	38.4902	- && - && -	-
HORVU.MOREX.r2.5HG0381760	82.4057	30.9549	153.158	33.4344	- && Q9SS31.1 RecName: Full=Probable calcium-binding protein CML36; AltName: Full=Calmodulin-like protein 36 && PF13499:EF-hand domain pair	-
novel.679	7.21183	1.63107	5.50653	0.806269	- && - && -	-
HORVU.MOREX.r2.2HG0157530	30.2007	48.6135	15.2241	38.5549	- && O80337.2 RecName: Full=Ethylene-responsive transcription factor 1A; Short=AtERF1A; AltName: Full=Ethylene-responsive element-binding factor 1A; Short=EREBP-1A && PF00847:AP2 domain	AP2
HORVU.MOREX.r2.2HG0174220	0.548398	1.37123	0.112139	1.03871	- && Q9FMY1.1 RecName: Full=Cytochrome P450 86B1 && PF00067:Cytochrome P450	p450
HORVU.MOREX.r2.3HG0247510	0.212712	0	0.952273	0	- && - && -	-
HORVU.MOREX.r2.5HG0398650	1.70129	2.73644	0.371877	3.25953	- && Q9LTV3.1 RecName: Full=Auxin-responsive protein SAUR72; AltName: Full=Protein SMALL AUXIN UP RNA 72 && PF02519:Auxin responsive protein	Auxin_inducible
HORVU.MOREX.r2.2HG0115300	0	0.873861	0.0200498	1.12652	- && - && -	-
HORVU.MOREX.r2.4HG0315510	276.358	468.844	153.667	499.351	- && P72777.1 RecName: Full=Ycf54-like protein && PF10674:Protein of unknown function (DUF2488)	-
HORVU.MOREX.r2.4HG0316950	336.909	584.32	220.743	639.904	- && P29344.1 RecName: Full=30S ribosomal protein S1, chloroplastic; AltName: Full=CS1; Flags: Precursor && PF00575:S1 RNA binding domain	S1
HORVU.MOREX.r2.7HG0606110	0.208152	0	3.11985	0.028866	- && Q9FG31.1 RecName: Full=Late embryogenesis abundant protein 46; AltName: Full=Late embryogenesis abundant protein 4-5; Short=AtLEA4-5 && PF03760:Late embryogenesis abundant (LEA) group 1	-
HORVU.MOREX.r2.1HG0072210	2.42107	4.14777	1.43302	4.06488	- && Q8S985.1 RecName: Full=Auxin response factor 15; AltName: Full=ETTIN-like protein 1; AltName: Full=OsETTIN1 && PF06507:Auxin response factor|PF02362:B3 DNA binding domain	Auxin_resp
HORVU.MOREX.r2.2HG0111910	57.7961	86.3158	44.5908	98.2726	- && Q9SUE0.1 RecName: Full=YlmG homolog protein 1-2, chloroplastic; Short=AtYLMG1-2; AltName: Full=YGGT family protein YLMG1-2; Flags: Precursor && PF02325:YGGT family	-
HORVU.MOREX.r2.2HG0180970	9.1851	20.3214	6.34561	21.792	- && Q66GI4.1 RecName: Full=Proteinaceous RNase P 1, chloroplastic/mitochondrial; AltName: Full=Pentatricopeptide repeat-containing protein At2g32230; Flags: Precursor && PF13812:Pentatricopeptide repeat domain|PF16953:Protein-only RNase P	-
HORVU.MOREX.r2.3HG0183270	50.9982	16.8837	56.2738	21.6744	- && - && -	-
HORVU.MOREX.r2.6HG0460340	16.8114	12.009	23.1375	8.18882	- && - && -	-
HORVU.MOREX.r2.6HG0524260	2.12927	0.591157	6.22085	0.665413	- && Q9ZSB0.1 RecName: Full=Subtilisin-like protease SBT3.9; AltName: Full=Subtilase subfamily 3 member 9; Short=AtSBT3.9; Flags: Precursor && PF05922:Peptidase inhibitor I9|PF00082:Subtilase family	Peptidase_S8
HORVU.MOREX.r2.2HG0159360	2.79598	0.616869	4.68522	0.609014	- && Q7XPF7.2 RecName: Full=Probable cation transporter HKT7; Short=OsHKT7 && PF02386:Cation transport protein	-
novel.118	0.275248	0.89188	0	1.01775	- && - && -	-
HORVU.MOREX.r2.6HG0510900	6.7692	3.76763	23.1568	6.29212	- && O04536.1 RecName: Full=Probable galacturonosyltransferase-like 9; AltName: Full=Like glycosyl transferase 8 && PF01501:Glycosyl transferase family 8	Glyco_transf_8
HORVU.MOREX.r2.7HG0529010	442.227	628.872	223.073	734.519	- && P41344.1 RecName: Full=Ferredoxin--NADP reductase, leaf isozyme, chloroplastic; Short=FNR; Flags: Precursor && PF00175:Oxidoreductase NAD-binding domain	NAD_binding_1
HORVU.MOREX.r2.3HG0192140	0.333527	0.0282021	1.96844	0.123251	- && O60870.2 RecName: Full=DNA/RNA-binding protein KIN17; AltName: Full=Binding to curved DNA; AltName: Full=KIN, antigenic determinant of recA protein homolog && PF10357:Domain of Kin17 curved DNA-binding protein	-
HORVU.MOREX.r2.2HG0150610	3.33057	0.803224	3.52504	0.901804	- && Q43210.1 RecName: Full=Phenylalanine ammonia-lyase && PF00221:Aromatic amino acid lyase	-
HORVU.MOREX.r2.4HG0311740	17.5055	24.8869	9.21793	24.155	- && O22056.2 RecName: Full=RNA polymerase sigma factor sigB; Short=Sigma factor B; Short=Sigma-B; AltName: Full=Protein ABERRANT CHLOROPLAST 1; AltName: Full=RNA polymerase sigma factor sig1; Short=Atsig1; Short=Sigma factor 1; AltName: Full=RNA polymera	Sigma70_r4
HORVU.MOREX.r2.5HG0425730	0.706927	0.611611	0.127718	1.23404	- && O65351.1 RecName: Full=Subtilisin-like protease SBT1.7; AltName: Full=Cucumisin-like serine protease; AltName: Full=Subtilase subfamily 1 member 7; Short=AtSBT1.7; AltName: Full=Subtilisin-like serine protease 1; Short=At-SLP1; Flags: Precursor && PF	Peptidase_S8
HORVU.MOREX.r2.1HG0060430	1.19651	1.74517	0.0571592	0.732365	- && Q6F2N0.1 RecName: Full=Transcription factor TGAL5; AltName: Full=bZIP transcription factor 41; Short=OsbZIP41 && PF14144:Seed dormancy control|PF00170:bZIP transcription factor	bZIP_1
HORVU.MOREX.r2.5HG0445120	6.54638	3.84609	14.0886	3.95597	- && Q9FIJ4.1 RecName: Full=DNA repair RAD52-like protein 2, chloroplastic; AltName: Full=Organellar DNA-binding protein 2; Flags: Precursor && -	-
HORVU.MOREX.r2.6HG0505130	30.8113	8.64603	64.7743	11.3275	- && - && -	-
HORVU.MOREX.r2.1HG0065260	0.435841	0.033532	3.41603	0.275448	- && P14928.1 RecName: Full=ABA-inducible protein PHV A1 && PF02987:Late embryogenesis abundant protein	-
HORVU.MOREX.r2.5HG0391570	46.0832	21.6913	138.516	30.7867	- && - && -	-
HORVU.MOREX.r2.2HG0087900	1.8324	1.21265	5.58838	0.85077	- && A6YIH8.1 RecName: Full=Premnaspirodiene oxygenase; Short=HPO; AltName: Full=Cytochrome P450 71D55 && PF00067:Cytochrome P450	p450
HORVU.MOREX.r2.4HG0283680	64.3025	15.6786	59.6758	10.1689	- && - && -	-
HORVU.MOREX.r2.5HG0439210	568.535	346.678	919.07	414.673	- && Q8L7Y9.1 RecName: Full=Non-specific phospholipase C1; Flags: Precursor && PF04185:Phosphoesterase family	Phosphoesterase
HORVU.MOREX.r2.5HG0396060	1.94785	4.25076	0.569043	3.8135	- && - && -	-
HORVU.MOREX.r2.2HG0132800	29.2762	22.7865	57.6786	18.0719	- && Q9FHB6.1 RecName: Full=Protein DETOXIFICATION 16; Short=AtDTX16; AltName: Full=Multidrug and toxic compound extrusion protein 16; Short=MATE protein 16 && PF01554:MatE	MatE
HORVU.MOREX.r2.5HG0351770	6.54778	16.5981	3.19013	14.7783	- && Q19VC6.2 RecName: Full=Photosystem II CP43 reaction center protein; AltName: Full=PSII 43 kDa protein; AltName: Full=Protein CP-43; Flags: Precursor && PF00421:Photosystem II protein	-
HORVU.MOREX.r2.2HG0123030	15.4478	28.7506	6.65711	23.8428	- && Q69LE7.1 RecName: Full=Probable polyribonucleotide nucleotidyltransferase 1, chloroplastic; AltName: Full=Polynucleotide phosphorylase 1; Short=PNPase 1; Flags: Precursor && PF01138:3' exoribonuclease family, domain 1|PF03725:3' exoribonuclease famil	RNase_PH
HORVU.MOREX.r2.1HG0030370	7.13912	4.77151	38.9916	16.0459	- && Q54GU0.1 RecName: Full=Putative transporter arsB && PF03600:Citrate transporter	-
HORVU.MOREX.r2.2HG0142460	21.7345	12.3106	45.4564	10.6316	- && F8WKW1.1 RecName: Full=7-deoxyloganetin glucosyltransferase; AltName: Full=Genipin glucosyltransferase; AltName: Full=UDP-glucose glucosyltransferase 2; Short=GjUGT2; AltName: Full=UDP-glycosyltransferase 85A24 && PF00201:UDP-glucoronosyl and UDP-glu	UDPGT
HORVU.MOREX.r2.6HG0456950	30.6837	6.71942	53.4951	9.91054	- && - && PF00280:Potato inhibitor I family	-
HORVU.MOREX.r2.6HG0463770	79.6869	57.0909	137.956	54.7307	- && Q9LJU7.1 RecName: Full=Purple acid phosphatase 18; Flags: Precursor && PF16656:Purple acid Phosphatase, N-terminal domain|PF00149:Calcineurin-like phosphoesterase|PF14008:Iron/zinc purple acid phosphatase-like protein C	Metallophos
HORVU.MOREX.r2.7HG0596210	48.0861	31.4655	79.3673	30.1086	- && P46643.1 RecName: Full=Aspartate aminotransferase, mitochondrial; AltName: Full=Transaminase A; Flags: Precursor && PF00155:Aminotransferase class I and II	Aminotran_1_2
HORVU.MOREX.r2.4HG0275980	12.5858	12.7647	2.15404	8.47739	- && Q9LND1.1 RecName: Full=Ethylene-responsive transcription factor ERF094; AltName: Full=Protein OCTADECANOID-RESPONSIVE ARABIDOPSIS AP2/ERF 59 && PF00847:AP2 domain	AP2
HORVU.MOREX.r2.2HG0127210	5.03523	12.328	4.77525	12.8796	- && - && -	-
novel.270	0	1.52325	0.018869	1.25799	- && - && -	-
HORVU.MOREX.r2.1HG0031990	1.08739	1.14661	2.29679	0.456696	- && - && PF06203:CCT motif	CCT
HORVU.MOREX.r2.1HG0012700	0	1.14232	0.0285177	0.939233	- && - && PF05699:hAT family C-terminal dimerisation region	hATC
HORVU.MOREX.r2.2HG0135880	20.7684	15.7304	47.1302	15.197	- && Q9LDD1.1 RecName: Full=Probable BOI-related E3 ubiquitin-protein ligase 3; AltName: Full=RING-type E3 ubiquitin transferase BRG3 && PF13920:Zinc finger, C3HC4 type (RING finger)	-
HORVU.MOREX.r2.3HG0237590	131.819	90.4689	370.165	138.196	- && - && PF04520:Senescence regulator	-
HORVU.MOREX.r2.1HG0006010	55.6837	96.8514	25.7591	118.354	- && F8WKW1.1 RecName: Full=7-deoxyloganetin glucosyltransferase; AltName: Full=Genipin glucosyltransferase; AltName: Full=UDP-glucose glucosyltransferase 2; Short=GjUGT2; AltName: Full=UDP-glycosyltransferase 85A24 && PF00201:UDP-glucoronosyl and UDP-glu	UDPGT
HORVU.MOREX.r2.1HG0007650	28.9491	10.5226	81.9647	15.4063	- && - && PF14368:Probable lipid transfer	-
HORVU.MOREX.r2.1HG0062420	10.564	2.93434	14.281	4.64303	- && Q9LMP1.1 RecName: Full=Wall-associated receptor kinase 2; Flags: Precursor && PF13947:Wall-associated receptor kinase galacturonan-binding|PF07714:Protein tyrosine kinase|PF07645:Calcium-binding EGF domain	Pkinase_Tyr
HORVU.MOREX.r2.2HG0135150	24.5791	37.9295	18.811	41.5279	- && Q9M8D3.3 RecName: Full=Probable phosphoribosylformylglycinamidine synthase, chloroplastic/mitochondrial; Short=FGAM synthase; Short=FGAMS; AltName: Full=Formylglycinamide ribonucleotide amidotransferase; Short=FGAR amidotransferase; Short=FGAR-AT; Al	-
HORVU.MOREX.r2.3HG0242220	9.15067	14.4028	5.48289	13.0187	- && F4I4Q3.1 RecName: Full=Protein DETOXIFICATION 32; Short=AtDTX32; AltName: Full=Multidrug and toxic compound extrusion protein 32; Short=MATE protein 32 && PF01554:MatE	MatE
HORVU.MOREX.r2.4HG0320040	0.0711457	0.664563	0.0207067	1.42313	- && - && -	-
novel.675	37.4646	19.7563	33.1555	9.72163	- && - && -	-
HORVU.MOREX.r2.7HG0550380	8.92856	1.84207	18.8606	2.00101	- && - && -	-
HORVU.MOREX.r2.2HG0160340	111.69	176.145	49.5006	228.007	- && Q9THX6.1 RecName: Full=Thylakoid lumenal 29 kDa protein, chloroplastic; Short=TL29; AltName: Full=LeAPx09; AltName: Full=P29; Flags: Precursor && PF00141:Peroxidase	-
HORVU.MOREX.r2.7HG0539820	0.87375	1.14007	0.0324318	0.889628	- && - && PF02458:Transferase family	-
HORVU.MOREX.r2.7HG0590580	18.8244	34.5783	9.9604	37.8961	- && Q8VY09.1 RecName: Full=Protein DJ-1 homolog C; Short=AtDJ1C; Flags: Precursor && PF01965:DJ-1/PfpI family	DJ-1_PfpI
HORVU.MOREX.r2.1HG0002330	25.1206	19.5229	50.2845	18.1227	- && O04940.1 RecName: Full=Phosphatidate cytidylyltransferase 1; AltName: Full=CDP-DAG synthase; AltName: Full=CDP-DG synthase; AltName: Full=CDP-diacylglycerol synthase; Short=CDS; AltName: Full=CDP-diglyceride pyrophosphorylase; AltName: Full=CDP-digly	-
HORVU.MOREX.r2.6HG0472740	0	4.19353	0	1.94489	- && - && -	-
HORVU.MOREX.r2.5HG0356880	153.614	178.14	57.48	140.483	- && Q7G8Y5.1 RecName: Full=Glutaredoxin-C1 && PF00462:Glutaredoxin	-
HORVU.MOREX.r2.2HG0161480	742.946	462.659	1104.4	389.699	- && Q6Z1D5.1 RecName: Full=Autophagy-related protein 8C; AltName: Full=Autophagy-related ubiquitin-like modifier ATG8C; Flags: Precursor >A2YS06.2 RecName: Full=Autophagy-related protein 8C; AltName: Full=Autophagy-related ubiquitin-like modifier ATG8C;	-
HORVU.MOREX.r2.5HG0401270	1314.57	968.615	2748.43	1060.02	- && P49044.1 RecName: Full=Vacuolar-processing enzyme; Short=VPE; AltName: Full=Proteinase B; Flags: Precursor && PF01650:Peptidase C13 family	-
HORVU.MOREX.r2.5HG0416300	4.64552	7.30893	2.53409	5.79374	- && Q0D5R3.1 RecName: Full=Cysteine-rich receptor-like protein kinase 6; Short=Cysteine-rich RLK6; Flags: Precursor && PF01657:Salt stress response/antifungal|PF00069:Protein kinase domain	Pkinase
novel.32	4.81716	3.16874	6.8603	2.72509	- && - && -	-
HORVU.MOREX.r2.6HG0474900	3.70609	3.33805	7.55809	2.77772	- && Q52K82.1 RecName: Full=Probable calcium-binding protein CML21; AltName: Full=Calmodulin-like protein 21 && PF13499:EF-hand domain pair	-
HORVU.MOREX.r2.5HG0413630	2.64625	1.13747	4.62814	1.18934	- && O81970.1 RecName: Full=Cytochrome P450 71A9; AltName: Full=Cytochrome P450 CP1 && PF00067:Cytochrome P450	p450
HORVU.MOREX.r2.2HG0079820	68.2681	29.9495	89.3152	27.4189	- && Q9FYA2.1 RecName: Full=Probable WRKY transcription factor 75; AltName: Full=WRKY DNA-binding protein 75 && PF03106:WRKY DNA -binding domain	WRKY
HORVU.MOREX.r2.1HG0050480	29.2303	20.9494	64.8008	23.4396	- && - && -	-
HORVU.MOREX.r2.7HG0596120	3.66339	1.82494	13.6655	2.56943	- && - && -	-
HORVU.MOREX.r2.3HG0214890	22.552	50.818	20.8506	60.3037	- && Q6NLB1.1 RecName: Full=F-box protein At2g26850 && PF00646:F-box domain	F-box
HORVU.MOREX.r2.5HG0427010	10.9791	27.4128	10.6324	41.3033	- && Q0RJF1.1 RecName: Full=Putative S-adenosyl-L-methionine-dependent methyltransferase FRAAL3718 && PF04072:Leucine carboxyl methyltransferase	-
HORVU.MOREX.r2.5HG0419240	11.2009	15.6774	7.65959	18.5059	- && F4IPY2.1 RecName: Full=Cysteine--tRNA ligase, chloroplastic/mitochondrial; AltName: Full=Cysteinyl-tRNA synthetase; Short=CysRS; Flags: Precursor && PF01406:tRNA synthetases class I (C) catalytic domain	tRNA-synt_1e
HORVU.MOREX.r2.4HG0335290	107.261	172.675	47.7249	189.131	- && O49668.1 RecName: Full=Protein PAM68, chloroplastic; AltName: Full=PHOTOSYNTHESIS AFFECTED MUTANT 68; Flags: Precursor && PF11947:Protein of unknown function (DUF3464)	-
HORVU.MOREX.r2.3HG0199680	26.4633	10.1746	31.7922	6.48901	- && Q9ZQ96.1 RecName: Full=UDP-glycosyltransferase 73C3 && PF00201:UDP-glucoronosyl and UDP-glucosyl transferase	UDPGT
HORVU.MOREX.r2.6HG0524500	1.56275	0.928625	4.12062	0.801161	- && - && PF02179:BAG domain	-
HORVU.MOREX.r2.4HG0327770	32.2453	48.0823	16.8458	45.3074	- && - && -	-
HORVU.MOREX.r2.5HG0425680	11.9912	22.4702	10.6897	24.2087	- && Q2TZM9.1 RecName: Full=Protein arginine N-methyltransferase 2; AltName: Full=Protein-arginine N5-methyltransferase; AltName: Full=Type IV protein arginine N-methyltransferase; Short=Type IV PRMT && PF13637:Ankyrin repeats (many copies)	-
HORVU.MOREX.r2.6HG0516670	0.172406	0.396422	1.14343	0.126276	- && P46526.1 RecName: Full=Cold shock protein CS66 && PF00257:Dehydrin	-
HORVU.MOREX.r2.3HG0205390	11.6208	17.5137	6.84586	21.8925	- && Q5NAY7.2 RecName: Full=GDT1-like protein 1, chloroplastic; Flags: Precursor && PF01169:Uncharacterized protein family UPF0016	-
HORVU.MOREX.r2.5HG0406250	32.2098	52.0599	19.3263	56.8956	- && Q8L633.1 RecName: Full=Ribonuclease Z, chloroplastic; Short=RNase Z; AltName: Full=Zinc phosphodiesterase CPZ; AltName: Full=tRNA 3 endonuclease; AltName: Full=tRNase Z; Flags: Precursor && PF12706:Beta-lactamase superfamily domain	-
HORVU.MOREX.r2.5HG0365590	1.20456	0	8.41563	1.00132	- && - && -	-
novel.721	5.29593	3.14162	11.8707	4.1463	- && - && -	-
HORVU.MOREX.r2.5HG0446820	12.5338	4.09833	18.4293	6.07469	- && A2XQD3.1 RecName: Full=G-type lectin S-receptor-like serine/threonine-protein kinase LECRK2; Short=OsLecRK2; Flags: Precursor && PF01453:D-mannose binding lectin|PF00069:Protein kinase domain	Pkinase
HORVU.MOREX.r2.UnG0632380	0	2.00933	0	2.90152	- && Q95H56.1 RecName: Full=50S ribosomal protein L33, chloroplastic >A1EA29.1 RecName: Full=50S ribosomal protein L33, chloroplastic >A1E9L1.1 RecName: Full=50S ribosomal protein L33, chloroplastic >A8Y9A7.1 RecName: Full=50S ribosomal protein L33, chlor	-
HORVU.MOREX.r2.6HG0517410	9.9898	22.6345	4.05809	22.9518	- && F4JKH6.1 RecName: Full=Protein TSS; AltName: Full=TPR-domain suppressor of STIMPY && PF15044:Mitochondrial function, CLU-N-term|PF13424:Tetratricopeptide repeat|PF12807:Translation initiation factor eIF3 subunit 135	-
HORVU.MOREX.r2.6HG0508630	7.5658	5.72661	18.72	6.95045	- && Q8L612.1 RecName: Full=MACPF domain-containing protein At1g14780 && PF01823:MAC/Perforin domain	-
HORVU.MOREX.r2.6HG0469980	0.81614	1.88088	0.230814	1.20355	- && - && PF03372:Endonuclease/Exonuclease/phosphatase family	Exo_endo_phos
HORVU.MOREX.r2.2HG0176530	0.104572	5.04581	0.127146	2.4826	- && P12339.2 RecName: Full=30S ribosomal protein S7, chloroplastic >Q6ENQ9.1 RecName: Full=30S ribosomal protein S7, chloroplastic >Q6L3C6.1 RecName: Full=30S ribosomal protein S7, chloroplastic >A1EA53.1 RecName: Full=30S ribosomal protein S7, chloropla	-
HORVU.MOREX.r2.4HG0315170	275.773	451.854	136.182	524.614	- && Q9LR64.1 RecName: Full=Photosystem II repair protein PSB27-H1, chloroplastic; Short=Psb27-H1; AltName: Full=Thylakoid lumenal protein PSB27-H1; Flags: Precursor && PF13326:Photosystem II Pbs27	-
HORVU.MOREX.r2.3HG0200760	3.16246	4.19753	1.04745	3.32684	- && Q5VQL3.1 RecName: Full=Phosphoenolpyruvate/phosphate translocator 3, chloroplastic; Short=OsPPT3; Flags: Precursor && PF03151:Triose-phosphate Transporter family	-
HORVU.MOREX.r2.7HG0535260	91.6071	145.248	43.2469	163.218	- && Q9SW18.1 RecName: Full=Magnesium protoporphyrin IX methyltransferase, chloroplastic; Flags: Precursor && PF07109:Magnesium-protoporphyrin IX methyltransferase C-terminus	-
HORVU.MOREX.r2.5HG0390060	134.257	210.869	76.6231	255.528	- && P82277.1 RecName: Full=30S ribosomal protein 2, chloroplastic; AltName: Full=Plastid-specific 30S ribosomal protein 2; Short=PSRP-2; Flags: Precursor && PF00076:RNA recognition motif. (a.k.a. RRM, RBD, or RNP domain)	RRM_1
HORVU.MOREX.r2.1HG0047430	3.00984	2.17983	7.80944	2.32384	- && Q39017.2 RecName: Full=Diacylglycerol kinase 1; Short=AtDGK1; Short=DAG kinase 1; AltName: Full=Diglyceride kinase 1; Short=DGK 1 && PF00781:Diacylglycerol kinase catalytic domain|PF00130:Phorbol esters/diacylglycerol binding domain (C1 domain)|PF006	C1_1
HORVU.MOREX.r2.7HG0572350	22.8092	33.8764	12.935	27.9954	- && - && PF03168:Late embryogenesis abundant protein	-
HORVU.MOREX.r2.4HG0300210	26.3464	43.081	18.9636	47.4462	- && Q2R1U4.1 RecName: Full=CDK5RAP1-like protein && PF00919:Uncharacterized protein family UPF0004|PF01938:TRAM domain|PF04055:Radical SAM superfamily	Radical_SAM
HORVU.MOREX.r2.5HG0355700	0.0135223	0	0.627989	0	- && - && PF03478:Protein of unknown function (DUF295)	DUF295
HORVU.MOREX.r2.7HG0611350	0.0978779	0.380084	0.0866691	0.575478	- && Q0JF58.1 RecName: Full=Protein argonaute 4B; Short=OsAGO4b && PF16486:N-terminal domain of argonaute|PF02170:PAZ domain|PF16488:Argonaute linker 2 domain|PF08699:Argonaute linker 1 domain|PF02171:Piwi domain	Piwi
HORVU.MOREX.r2.5HG0440710	2.32898	5.41716	0.794239	3.23675	- && O65399.3 RecName: Full=Glucan endo-1,3-beta-glucosidase 1; AltName: Full=(1->3)-beta-glucan endohydrolase 1; Short=(1->3)-beta-glucanase 1; AltName: Full=Beta-1,3-endoglucanase 1; Short=Beta-1,3-glucanase 1; Flags: Precursor && PF07983:X8 domain	-
HORVU.MOREX.r2.3HG0231860	55.5069	85.001	33.3633	112.758	- && - && -	-
HORVU.MOREX.r2.1HG0060840	35.7115	22.7782	65.7868	27.9673	- && P0C542.1 RecName: Full=Actin-7 >P0C540.1 RecName: Full=Actin-7 && PF00022:Actin	Actin
HORVU.MOREX.r2.1HG0066410	9.93528	7.04217	16.5319	4.60184	- && Q8H0Z6.1 RecName: Full=Type IV inositol polyphosphate 5-phosphatase 3; Short=At5PTase3 && PF03372:Endonuclease/Exonuclease/phosphatase family	Exo_endo_phos
HORVU.MOREX.r2.7HG0598660	11.9377	4.25682	44.5576	6.08286	- && Q6ZCR3.1 RecName: Full=Germin-like protein 8-12; Flags: Precursor && PF00190:Cupin	-
HORVU.MOREX.r2.5HG0437400	22.0257	5.44336	55.5753	11.7749	- && - && PF13912:C2H2-type zinc finger	-
HORVU.MOREX.r2.6HG0520660	2.9721	1.00164	8.77986	1.17749	- && Q1MX30.1 RecName: Full=Receptor kinase-like protein Xa21; Contains: RecName: Full=Receptor kinase-like protein Xa21, processed; Flags: Precursor && PF00069:Protein kinase domain|PF13855:Leucine rich repeat	Pkinase
HORVU.MOREX.r2.2HG0149810	0	0.0152797	0.939273	0	- && Q9LIG0.1 RecName: Full=Clavaminate synthase-like protein At3g21360 && PF02668:Taurine catabolism dioxygenase TauD, TfdA family	-
HORVU.MOREX.r2.7HG0603100	7.66007	4.74408	16.0752	5.98501	- && - && -	-
HORVU.MOREX.r2.4HG0320350	35.9949	24.3131	48.5573	22.7778	- && Q852Q1.1 RecName: Full=Serine/threonine protein kinase OSK4; Short=OsK4; AltName: Full=SUCROSE NON-FERMENTING-1 related protein kinase 1B; Short=SNF1-related kinase 1B; Short=SnRK1B; AltName: Full=Serine/threonine protein kinase OSK24; Short=OsK24 >B	Pkinase
HORVU.MOREX.r2.6HG0464420	7.57814	3.05828	11.1264	2.98978	- && Q9FWX7.1 RecName: Full=ABC transporter B family member 11; Short=ABC transporter ABCB.11; Short=AtABCB11; AltName: Full=Multidrug resistance protein 8; AltName: Full=P-glycoprotein 11 && PF07673:Protein of unknown function (DUF1602)|PF00664:ABC trans	ABC_membrane
HORVU.MOREX.r2.5HG0400470	0.339343	1.36966	0.321967	1.70272	- && A1E9J1.1 RecName: Full=Photosystem I P700 chlorophyll a apoprotein A1; AltName: Full=PSI-A; AltName: Full=PsaA && PF00223:Photosystem I psaA/psaB protein	-
HORVU.MOREX.r2.5HG0439240	12.1963	24.8199	2.04573	10.4671	- && - && -	-
HORVU.MOREX.r2.1HG0030190	1.74146	4.02249	1.01899	2.99278	- && - && -	-
HORVU.MOREX.r2.1HG0015850	7.24913	3.10279	10.1452	2.68315	- && A3AZW5.1 RecName: Full=Probable sucrose-phosphatase 3; Short=OsSPP3 && PF08472:Sucrose-6-phosphate phosphohydrolase C-terminal|PF05116:Sucrose-6F-phosphate phosphohydrolase	-
HORVU.MOREX.r2.7HG0542400	26.788	11.071	42.592	8.37114	- && Q9T0A0.1 RecName: Full=Long chain acyl-CoA synthetase 4 && PF00501:AMP-binding enzyme	AMP-binding
HORVU.MOREX.r2.5HG0436100	194.385	372.107	97.905	408.401	- && O80363.1 RecName: Full=50S ribosomal protein L17, chloroplastic; AltName: Full=CL17; Flags: Precursor && PF01196:Ribosomal protein L17	-
HORVU.MOREX.r2.3HG0245710	6.14746	8.14959	1.99817	6.15933	- && Q8GTS1.1 RecName: Full=Basic leucine zipper 24; Short=AtbZIP24; Short=bZIP protein 24 && PF07716:Basic region leucine zipper	bZIP_2
HORVU.MOREX.r2.3HG0196110	3.8049	5.91461	2.14587	6.56596	- && Q9KF10.1 RecName: Full=Uncharacterized RNA methyltransferase BH0687 && PF05958:tRNA (Uracil-5-)-methyltransferase	-
HORVU.MOREX.r2.2HG0173420	19.9922	6.70387	23.2847	5.6226	- && Q2R2D5.1 RecName: Full=Receptor kinase-like protein Xa21; Contains: RecName: Full=Receptor kinase-like protein Xa21, processed; Flags: Precursor && PF13855:Leucine rich repeat|PF00069:Protein kinase domain|PF08263:Leucine rich repeat N-terminal domai	Pkinase
HORVU.MOREX.r2.1HG0037530	49.2072	23.4095	61.5649	25.8672	- && P37225.1 RecName: Full=NAD-dependent malic enzyme 59 kDa isoform, mitochondrial; Short=NAD-ME; Flags: Precursor && PF00390:Malic enzyme, N-terminal domain|PF03949:Malic enzyme, NAD binding domain	Malic_M
HORVU.MOREX.r2.5HG0441640	6.66109	12.3911	3.27448	14.3355	- && Q9SND9.1 RecName: Full=Uncharacterized acetyltransferase At3g50280 && PF02458:Transferase family	-
HORVU.MOREX.r2.1HG0038910	2.54922	2.05427	5.96239	2.35661	- && Q9ZUZ2.1 RecName: Full=CDPK-related kinase 3; Short=AtCRK3; AltName: Full=Calcium/calmodulin-dependent protein kinase 4; Short=AtCK && PF00069:Protein kinase domain	Pkinase
HORVU.MOREX.r2.6HG0503370	8.78855	10.641	4.39537	11.1734	- && Q8LBV4.1 RecName: Full=Uncharacterized methyltransferase At1g78140, chloroplastic; Flags: Precursor && PF08241:Methyltransferase domain	Methyltransf_11
HORVU.MOREX.r2.5HG0356760	107.32	118.044	35.0068	80.565	- && Q7G8Y5.1 RecName: Full=Glutaredoxin-C1 && PF00462:Glutaredoxin	-
HORVU.MOREX.r2.1HG0074470	111.087	164.06	62.7031	178.29	- && - && PF12159:Protein of unknown function (DUF3593)	-
HORVU.MOREX.r2.6HG0449550	0.0174695	0.481848	0	0.371902	- && P0C897.1 RecName: Full=Putative UPF0481 protein At3g02645 && PF03140:Plant protein of unknown function	-
HORVU.MOREX.r2.5HG0447820	73.6941	31.2755	86.9062	26.4855	- && Q8GU84.1 RecName: Full=ABC transporter G family member 48; Short=OsABCG48; AltName: Full=Pleiotropic drug resistance protein 3; Short=OsPDR3 && PF08370:Plant PDR ABC transporter associated|PF00005:ABC transporter|PF14510:ABC-transporter extracellular	ABC2_membrane
HORVU.MOREX.r2.2HG0140340	22.2553	17.3223	110.979	37.0818	- && - && -	-
HORVU.MOREX.r2.4HG0348720	322.486	468.27	136.699	647.473	- && P83304.1 RecName: Full=Mannose/glucose-specific lectin && PF01419:Jacalin-like lectin domain|PF03018:Dirigent-like protein	-
HORVU.MOREX.r2.UnG0627890	2.78537	0.63561	4.46242	1.31476	- && Q9SRQ1.1 RecName: Full=Cytochrome P450 89A9 && PF00067:Cytochrome P450	p450
HORVU.MOREX.r2.2HG0115620	33.9148	12.7942	58.1794	19.0923	- && Q94B38.2 RecName: Full=Glucose-6-phosphate/phosphate translocator 2, chloroplastic; Flags: Precursor && PF03151:Triose-phosphate Transporter family	-
HORVU.MOREX.r2.2HG0106960	47.8592	38.3425	97.4946	35.9314	- && P19182.2 RecName: Full=Interferon-related developmental regulator 1; AltName: Full=Nerve growth factor-inducible protein PC4; AltName: Full=TPA-induced sequence 7; Short=TIS7 protein && PF05004:Interferon-related developmental regulator (IFRD)	-
HORVU.MOREX.r2.1HG0033830	8.44172	4.76043	12.9634	3.79631	- && Q8VZF6.1 RecName: Full=Protein ENHANCED DISEASE RESISTANCE 2-like && PF01852:START domain|PF00169:PH domain|PF07059:Protein of unknown function (DUF1336)	START
HORVU.MOREX.r2.7HG0617740	2.71966	0.436586	4.44488	0.797644	- && Q2QYW1.1 RecName: Full=Probable calcium-binding protein CML25/26; AltName: Full=Calmodulin-like protein 25/26 && PF13833:EF-hand domain pair	-
HORVU.MOREX.r2.7HG0543960	2.77857	6.04061	1.31943	5.71041	- && - && -	-
HORVU.MOREX.r2.5HG0405140	8.68807	12.08	5.69885	14.1556	- && Q0DCT8.1 RecName: Full=Protein kinase G11A && PF00069:Protein kinase domain	Pkinase
HORVU.MOREX.r2.4HG0326470	19.747	29.7699	14.0381	28.4608	- && Q10P67.1 RecName: Full=Probable 4-hydroxy-tetrahydrodipicolinate reductase 2, chloroplastic; Short=HTPA reductase 2; Flags: Precursor && PF01113:Dihydrodipicolinate reductase, N-terminus|PF05173:Dihydrodipicolinate reductase, C-terminus	DapB_N
HORVU.MOREX.r2.5HG0435270	18.6655	42.2056	12.076	35.0366	- && - && -	-
HORVU.MOREX.r2.5HG0367920	487.604	160.175	764.682	162.403	- && - && PF00407:Pathogenesis-related protein Bet v I family	-
HORVU.MOREX.r2.6HG0503990	110.83	72.4386	232.879	84.5417	- && Q8LGG8.2 RecName: Full=Universal stress protein A-like protein && PF00582:Universal stress protein family	Usp
HORVU.MOREX.r2.5HG0426370	43.4328	55.5237	148.867	60.2837	- && Q9XIM7.1 RecName: Full=Cold-regulated 413 plasma membrane protein 1; Short=AtCOR413-PM1; AltName: Full=WCOR413-like protein && PF05562:Cold acclimation protein WCOR413	-
HORVU.MOREX.r2.5HG0431480	1.5938	1.76653	10.1284	1.95936	- && - && -	-
HORVU.MOREX.r2.2HG0084360	0.160776	0.435674	0	0.610578	- && Q8L5A7.1 RecName: Full=Cytosolic sulfotransferase 15; Short=AtSOT15; AltName: Full=Sulfotransferase 2a; Short=AtST2a && PF00685:Sulfotransferase domain	Sulfotransfer_1
HORVU.MOREX.r2.1HG0047780	19.4779	4.7208	55.1247	7.24241	- && - && PF15699:NPR1 interacting	-
HORVU.MOREX.r2.6HG0510100	51.8131	26.2652	84.0171	29.9295	- && Q8VYI1.1 RecName: Full=Sphinganine C4-monooxygenase 1; AltName: Full=Sphingoid C4-hydroxylase 1; AltName: Full=Sphingoid base hydroxylase 1 && PF04116:Fatty acid hydroxylase superfamily	-
HORVU.MOREX.r2.2HG0084300	88.986	139.372	46.697	203.6	- && P08823.1 RecName: Full=RuBisCO large subunit-binding protein subunit alpha, chloroplastic; AltName: Full=60 kDa chaperonin subunit alpha; AltName: Full=CPN-60 alpha; Flags: Precursor && PF00118:TCP-1/cpn60 chaperonin family	-
HORVU.MOREX.r2.7HG0614070	4.71237	5.67281	3.85147	8.68746	- && - && PF13041:PPR repeat family	-
HORVU.MOREX.r2.6HG0448860	1.99283	0.723192	3.33414	0.865789	- && - && PF08263:Leucine rich repeat N-terminal domain|PF13855:Leucine rich repeat	LRRNT_2
HORVU.MOREX.r2.3HG0227930	1.39413	0.865645	3.16381	0.892024	- && Q6L5F5.1 RecName: Full=Probable isoprenylcysteine alpha-carbonyl methylesterase ICME && PF07859:alpha/beta hydrolase fold	Abhydrolase_3
HORVU.MOREX.r2.4HG0296570	72.5644	100.993	46.8196	112.402	- && W5EP13.1 RecName: Full=2-carboxy-D-arabinitol-1-phosphatase; Flags: Precursor && PF00300:Histidine phosphatase superfamily (branch 1)	-
HORVU.MOREX.r2.6HG0462660	3.428	1.74774	7.43705	1.37707	- && Q6YXZ1.1 RecName: Full=Putative vacuolar cation/proton exchanger 4; AltName: Full=Ca(2+)/H(+) exchanger 4; AltName: Full=OsCAX4 && PF01699:Sodium/calcium exchanger protein	Na_Ca_ex
HORVU.MOREX.r2.7HG0535520	55.8098	34.438	106.587	39.1707	- && Q9LPL3.1 RecName: Full=Probable indole-3-pyruvate monooxygenase YUCCA11; AltName: Full=Flavin-containing monooxygenase YUCCA11 && PF00743:Flavin-binding monooxygenase-like	FMO-like
HORVU.MOREX.r2.7HG0587790	4.43419	3.83935	16.8782	6.70748	- && Q0J6T3.2 RecName: Full=Probable cinnamyl alcohol dehydrogenase 5; Short=OsCAD5 && PF08240:Alcohol dehydrogenase GroES-like domain|PF00107:Zinc-binding dehydrogenase	ADH_N
HORVU.MOREX.r2.4HG0303940	1.68007	3.26862	0.784344	4.1643	- && - && -	-
HORVU.MOREX.r2.3HG0271750	7.17659	1.45348	7.36458	1.61067	- && Q06398.2 RecName: Full=Probable glutathione S-transferase GSTU6; AltName: Full=28 kDa cold-induced protein && PF13417:Glutathione S-transferase, N-terminal domain	-
HORVU.MOREX.r2.5HG0377750	14.3824	22.4618	9.02622	21.7361	- && Q941D6.1 RecName: Full=Histone deacetylase 14 && PF00850:Histone deacetylase domain	Hist_deacetyl
HORVU.MOREX.r2.6HG0495370	125.623	82.4819	238.245	92.8763	- && Q6H849.1 RecName: Full=Bifunctional nitrilase/nitrile hydratase NIT4; Short=OsNIT4; AltName: Full=Cyanoalanine nitrilase; AltName: Full=Nitrilase 4 && PF00795:Carbon-nitrogen hydrolase	CN_hydrolase
HORVU.MOREX.r2.1HG0065170	32.527	14.098	51.6332	16.6347	- && P93733.4 RecName: Full=Phospholipase D beta 1; Short=AtPLDbeta1; Short=PLD beta 1; Short=PLDbeta && PF12357:Phospholipase D C terminal|PF00614:Phospholipase D Active site motif|PF00168:C2 domain|PF13091:PLD-like domain	C2
HORVU.MOREX.r2.6HG0458440	239.652	321.699	159.728	382.9	- && Q9SYX1.1 RecName: Full=Light-harvesting complex-like protein 3 isotype 1, chloroplastic; AltName: Full=LHC-like protein 3 isoform 1; Flags: Precursor && -	-
HORVU.MOREX.r2.7HG0541250	148.822	217.362	61.1696	183.709	- && Q9LU21.1 RecName: Full=Photosynthetic NDH subunit of subcomplex B 3, chloroplastic; Short=Protein PnsB3; AltName: Full=NDH-DEPENDENT CYCLIC ELECTRON FLOW 4; Flags: Precursor && PF00111:2Fe-2S iron-sulfur cluster binding domain	Fer2
HORVU.MOREX.r2.3HG0236300	19.0945	9.72585	25.1891	8.98181	- && - && -	-
HORVU.MOREX.r2.2HG0108940	8.61902	12.2677	4.55908	11.6324	- && - && PF01593:Flavin containing amine oxidoreductase	Amino_oxidase
HORVU.MOREX.r2.6HG0494280	40.2637	28.6916	58.476	28.0157	- && Q96524.2 RecName: Full=Cryptochrome-2; Short=Atcry2; AltName: Full=Blue light photoreceptor; AltName: Full=Protein PHR homolog 1; Short=AtPHH1; AltName: Full=Protein SUPPRESSOR OF elf3 20 && PF03441:FAD binding domain of DNA photolyase|PF00875:DNA ph	-
HORVU.MOREX.r2.6HG0518840	1.9723	0.276292	3.45467	0.809664	- && - && PF13962:Domain of unknown function	-
HORVU.MOREX.r2.4HG0278920	37.3387	12.7835	39.1553	14.2205	- && - && PF06813:Nodulin-like	-
HORVU.MOREX.r2.6HG0449490	2.73882	2.10445	10.6635	1.59896	- && Q9M130.1 RecName: Full=WAT1-related protein At4g01440 && PF00892:EamA-like transporter family	DUF6
HORVU.MOREX.r2.5HG0426880	5.28275	4.2585	27.2841	9.70679	- && I4DST9.1 RecName: Full=Tuliposide A-converting enzyme 2, chloroplastic; Short=TgTCEA2; Flags: Precursor && PF07859:alpha/beta hydrolase fold	Abhydrolase_3
HORVU.MOREX.r2.1HG0044610	5.90337	3.42372	0.860898	3.16906	- && Q7XCA7.1 RecName: Full=Expansin-B6; AltName: Full=Beta-expansin-6; AltName: Full=OsEXPB6; AltName: Full=OsaEXPb1.8; Flags: Precursor && PF01357:Pollen allergen|PF03330:Rare lipoprotein A (RlpA)-like double-psi beta-barrel	-
HORVU.MOREX.r2.5HG0424570	13.9656	14.833	5.06898	11.5432	- && Q850M0.1 RecName: Full=Two pore potassium channel a; Short=Two K(+) channel a; AltName: Full=Calcium-activated outward-rectifying potassium channel 1; Short=OsKCO1 && PF07885:Ion channel	Ion_trans_2
novel.1130	0.419648	0.0211175	1.94175	0.0520399	- && - && -	-
HORVU.MOREX.r2.4HG0286990	0.895486	0.211488	1.23472	0.11994	- && P48979.1 RecName: Full=Polygalacturonase; Short=PG; AltName: Full=Pectinase; Flags: Precursor [Prunus persica] && PF00295:Glycosyl hydrolases family 28	-
HORVU.MOREX.r2.6HG0474510	27.6234	38.9774	12.7499	37.0785	- && Q944B0.1 RecName: Full=Peptidyl-prolyl cis-trans isomerase FKBP16-1, chloroplastic; Short=PPIase FKBP16-1; AltName: Full=FK506-binding protein 16-1; Short=AtFKBP16-1; AltName: Full=Immunophilin FKBP16-1; AltName: Full=Rotamase; Flags: Precursor && PF	FKBP_C
HORVU.MOREX.r2.3HG0231420	13.115	6.93088	18.9664	5.60576	- && - && -	-
HORVU.MOREX.r2.7HG0558740	0.0596079	0.696947	0.0171714	0.67293	- && - && PF13962:Domain of unknown function	-
HORVU.MOREX.r2.4HG0319260	100.294	37.7484	186.201	48.6226	- && Q9M015.1 RecName: Full=Uncharacterized protein At5g01610 && PF04398:Protein of unknown function, DUF538	-
HORVU.MOREX.r2.7HG0539650	42.2735	66.777	24.3388	58.0589	- && - && PF09353:Domain of unknown function (DUF1995)	-
HORVU.MOREX.r2.2HG0101160	1.34798	0.825524	4.8245	0.712186	- && - && -	-
HORVU.MOREX.r2.5HG0435830	95.2573	208.09	47.6777	244.531	- && - && -	-
HORVU.MOREX.r2.5HG0398160	1.80459	4.11427	0.962307	3.45621	- && Q9FZ59.1 RecName: Full=Leucine-rich repeat receptor-like protein kinase PEPR2; AltName: Full=Elicitor peptide 1 receptor 2; Short=PEP1 receptor 2; Flags: Precursor && PF00069:Protein kinase domain|PF13855:Leucine rich repeat	Pkinase
HORVU.MOREX.r2.2HG0086140	18.9047	3.55355	27.4275	7.20894	- && Q7XWU3.2 RecName: Full=Probable cinnamyl alcohol dehydrogenase 6; Short=OsCAD6 && PF08240:Alcohol dehydrogenase GroES-like domain|PF00107:Zinc-binding dehydrogenase	ADH_N
HORVU.MOREX.r2.2HG0168190	345.033	578.449	188.156	684.695	- && P13564.2 RecName: Full=Glutamine synthetase leaf isozyme, chloroplastic; AltName: Full=GS2; AltName: Full=Glutamate--ammonia ligase; Flags: Precursor && PF00120:Glutamine synthetase, catalytic domain|PF03951:Glutamine synthetase, beta-Grasp domain	-
HORVU.MOREX.r2.5HG0358200	60.3783	55.0968	6.39781	20.9253	- && Q10444.1 RecName: Full=Glucan 1,3-beta-glucosidase 2; AltName: Full=Exo-1,3-beta-glucanase 2; Flags: Precursor && PF00150:Cellulase (glycosyl hydrolase family 5)	-
HORVU.MOREX.r2.6HG0505350	149.236	250.499	99.0288	325.651	- && A3F5L3.1 RecName: Full=Fatty acid desaturase DES2; Short=SbDES2 && PF00487:Fatty acid desaturase|PF11960:Domain of unknown function (DUF3474)	-
HORVU.MOREX.r2.6HG0477040	500.664	680.732	265.942	695.445	- && - && PF01165:Ribosomal protein S21	-
HORVU.MOREX.r2.3HG0214140	19.5602	37.6347	5.83145	28.9495	- && - && -	-
HORVU.MOREX.r2.5HG0401150	25.8426	36.6164	13.3576	33.0341	- && - && PF02517:CAAX protease self-immunity	-
HORVU.MOREX.r2.4HG0330830	68.4029	115.822	37.3195	140.324	- && - && -	-
HORVU.MOREX.r2.3HG0242500	1.08025	0.356833	3.07995	0.434348	- && - && PF03798:TLC domain	LAG1
HORVU.MOREX.r2.5HG0371270	8.25585	5.65593	16.5464	5.34091	- && - && -	-
HORVU.MOREX.r2.2HG0131440	139.105	110.649	262.733	126.414	- && Q10716.1 RecName: Full=Cysteine proteinase 1; Flags: Precursor && PF00112:Papain family cysteine protease|PF08246:Cathepsin propeptide inhibitor domain (I29)	Peptidase_C1
HORVU.MOREX.r2.2HG0160100	8.3885	10.6417	2.94708	10.3341	- && O80522.1 RecName: Full=GDSL esterase/lipase At1g09390; AltName: Full=Extracellular lipase At1g09390; Flags: Precursor && PF00657:GDSL-like Lipase/Acylhydrolase	Lipase_GDSL
HORVU.MOREX.r2.6HG0481770	304.649	399.813	169.86	387.674	- && P51412.1 RecName: Full=50S ribosomal protein L21, chloroplastic; AltName: Full=CL21; Flags: Precursor && PF00829:Ribosomal prokaryotic L21 protein	-
HORVU.MOREX.r2.7HG0602580	7.53803	6.14256	14.1689	6.60239	- && Q9LY62.1 RecName: Full=Glycosyltransferase family 64 protein C4; Short=GT64 C4; AltName: Full=Protein ECTOPICALLY PARTING CELLS 1; Short=AtEPC1 && PF09258:Glycosyl transferase family 64 domain	-
HORVU.MOREX.r2.3HG0272110	47.3622	81.6168	27.5735	87.6092	- && Q8RWM7.1 RecName: Full=Protein COFACTOR ASSEMBLY OF COMPLEX C SUBUNIT B CCB3, chloroplastic; AltName: Full=YGGT family protein YLMG3; AltName: Full=YlmG homolog protein 3; Short=AtYLMG3; Flags: Precursor && PF02325:YGGT family	-
HORVU.MOREX.r2.2HG0158600	1.21799	1.13	5.4867	1.3302	- && Q84ZW8.1 RecName: Full=Acyclic sesquiterpene synthase; AltName: Full=(3R,6E)-nerolidol synthase; AltName: Full=Beta-farnesene synthase; AltName: Full=Farnesyl diphosphatase; AltName: Full=Terpene synthase 1 && PF03936:Terpene synthase family, metal b	-
HORVU.MOREX.r2.2HG0112770	6.08571	9.41119	6.2364	13.2787	- && O81906.1 RecName: Full=G-type lectin S-receptor-like serine/threonine-protein kinase B120; Flags: Precursor && PF08276:PAN-like domain|PF07714:Protein tyrosine kinase|PF00954:S-locus glycoprotein domain|PF01453:D-mannose binding lectin	Pkinase_Tyr
HORVU.MOREX.r2.2HG0082760	2.19251	1.35565	7.9324	1.61737	- && - && -	-
HORVU.MOREX.r2.6HG0515330	0.645989	0.751377	6.45925	1.97074	- && Q6K7E9.1 RecName: Full=18.6 kDa class III heat shock protein; AltName: Full=18.6 kDa heat shock protein; Short=OsHsp18.6 && PF00011:Hsp20/alpha crystallin family	-
HORVU.MOREX.r2.2HG0159200	0.973528	0.0962906	3.85274	0.139929	- && - && -	-
HORVU.MOREX.r2.3HG0211890	0.40987	0.868056	0.421403	1.83279	- && Q9ZS34.1 RecName: Full=Geranylgeranyl diphosphate reductase, chloroplastic; AltName: Full=Geranylgeranyl reductase; Flags: Precursor && -	-
HORVU.MOREX.r2.2HG0113220	5.62441	7.86545	3.10291	9.09822	- && - && PF13041:PPR repeat family	-
HORVU.MOREX.r2.5HG0427220	87.0913	69.274	144.482	68.1182	- && Q6ZDY8.1 RecName: Full=Succinate dehydrogenase [ubiquinone] flavoprotein subunit, mitochondrial; AltName: Full=Flavoprotein subunit of complex II; Short=FP; Flags: Precursor && PF00890:FAD binding domain|PF02910:Fumarate reductase flavoprotein C-term	-
HORVU.MOREX.r2.4HG0337480	6.42307	8.5053	4.40773	10.8156	- && - && PF13041:PPR repeat family|PF12854:PPR repeat	-
HORVU.MOREX.r2.4HG0317770	0.471651	0.165756	1.28711	0.0892535	- && - && -	-
HORVU.MOREX.r2.7HG0542800	2.84688	0.688836	3.30048	0.745861	- && Q9ZSB0.1 RecName: Full=Subtilisin-like protease SBT3.9; AltName: Full=Subtilase subfamily 3 member 9; Short=AtSBT3.9; Flags: Precursor && PF05922:Peptidase inhibitor I9|PF00082:Subtilase family	Peptidase_S8
HORVU.MOREX.r2.7HG0604380	4.24824	2.48069	9.50682	3.33121	- && Q9LJJ7.1 RecName: Full=AAA-ATPase At3g28580 && PF00004:ATPase family associated with various cellular activities (AAA)|PF14363:Domain associated at C-terminal with AAA	AAA
novel.1656	2.58094	1.40908	6.76562	1.78878	- && - && -	-
HORVU.MOREX.r2.2HG0139110	19.982	13.1326	35.8417	11.1651	- && Q7XQQ2.4 RecName: Full=Thioredoxin M3, chloroplastic; Short=OsTrxm3; AltName: Full=OsTrx11; Flags: Precursor && PF00085:Thioredoxin	-
HORVU.MOREX.r2.4HG0347910	0.200483	1.17589	0.130554	2.44253	- && - && -	-
HORVU.MOREX.r2.6HG0490340	111.315	168.437	65.5368	178.412	- && Q8LDL0.1 RecName: Full=Protein HHL1, chloroplastic; AltName: Full=Hypersensitive to high light 1; Flags: Precursor && -	-
HORVU.MOREX.r2.3HG0184560	8.27966	3.7015	34.4766	5.30442	- && Q5ZEF1.1 RecName: Full=Protein NEGATIVE REGULATOR OF RESISTANCE; AltName: Full=NPR1-interactor && PF15699:NPR1 interacting	-
HORVU.MOREX.r2.3HG0227920	2.97609	1.56364	5.65172	1.5705	- && Q147F9.1 RecName: Full=AAA-ATPase At3g50940; Flags: Precursor && PF14363:Domain associated at C-terminal with AAA|PF00004:ATPase family associated with various cellular activities (AAA)	AAA
HORVU.MOREX.r2.6HG0478550	0	0.429127	0	0.37848	- && - && -	-
HORVU.MOREX.r2.4HG0325680	2.23958	1.15655	3.09722	0.649274	- && Q9SU25.1 RecName: Full=Transcription initiation factor IIF subunit alpha; Short=TFIIF-alpha; AltName: Full=General transcription factor IIF subunit 1; AltName: Full=Transcription initiation factor RAP74 homolog; Short=AtRAP74 && PF05793:Transcription	-
novel.1048	0.14583	0.141239	1.0054	0	- && - && -	-
HORVU.MOREX.r2.5HG0392060	0.304407	0.0534642	2.66639	0.352992	- && Q9M6E8.1 RecName: Full=9-cis-epoxycarotenoid dioxygenase NCED1, chloroplastic; AltName: Full=PvNCED1; Flags: Precursor && PF03055:Retinal pigment epithelial membrane protein	RPE65
HORVU.MOREX.r2.2HG0116510	877.659	1373.07	485.76	1477.77	- && P0C1M0.1 RecName: Full=ATP synthase subunit gamma, chloroplastic; AltName: Full=F-ATPase gamma subunit; Contains: RecName: Full=Inceptin; Flags: Precursor && PF00231:ATP synthase	-
HORVU.MOREX.r2.4HG0277080	97.9604	167.115	75.2356	189.393	- && - && PF00248:Aldo/keto reductase family	Aldo_ket_red
HORVU.MOREX.r2.1HG0042340	147.858	217.203	101.408	203.788	- && Q94B60.1 RecName: Full=ATP-dependent Clp protease proteolytic subunit 4, chloroplastic; AltName: Full=Endopeptidase ClpP4; Short=nClpP4; AltName: Full=nClpP3; Flags: Precursor && PF00574:Clp protease	-
HORVU.MOREX.r2.1HG0002410	1.0124	1.65679	0.248372	1.09161	- && O64477.1 RecName: Full=G-type lectin S-receptor-like serine/threonine-protein kinase At2g19130; Flags: Precursor && PF00954:S-locus glycoprotein domain|PF01453:D-mannose binding lectin|PF08276:PAN-like domain|PF00069:Protein kinase domain	Pkinase
HORVU.MOREX.r2.5HG0426870	10.143	14.0644	6.93607	14.0792	- && - && PF06219:Protein of unknown function (DUF1005)	-
HORVU.MOREX.r2.4HG0336750	10.0306	17.4094	7.8696	19.437	- && - && -	-
HORVU.MOREX.r2.7HG0605460	0.797283	1.2537	0.453394	1.39682	- && - && PF13855:Leucine rich repeat	-
HORVU.MOREX.r2.6HG0505650	18.5755	7.60037	66.7327	8.63491	- && - && -	-
HORVU.MOREX.r2.1HG0046050	69.5407	43	119.102	43.7999	- && Q0WWQ1.2 RecName: Full=Autophagy-related protein 3; AltName: Full=Autophagy-related E2-like conjugation enzyme ATG3; Short=AtAPG3; Short=Protein autophagy 3 && PF03987:Autophagocytosis associated protein, active-site domain|PF03986:Autophagocytosis a	-
HORVU.MOREX.r2.2HG0143620	108.335	76.4084	226.083	96.2031	- && Q40024.1 RecName: Full=Betaine aldehyde dehydrogenase; Short=BADH && PF00171:Aldehyde dehydrogenase family	Aldedh
HORVU.MOREX.r2.1HG0015630	38.601	24.9344	65.98	23.341	- && Q7XI08.1 RecName: Full=Probable E3 ubiquitin-protein ligase XBOS34; AltName: Full=Ankyrin repeat domain and RING finger-containing protein XBOS34; AltName: Full=XB3 protein homolog 4 && PF13920:Zinc finger, C3HC4 type (RING finger)|PF13637:Ankyrin re	-
HORVU.MOREX.r2.UnG0632790	0.171389	2.57314	0.107622	2.18339	- && P12339.2 RecName: Full=30S ribosomal protein S7, chloroplastic >Q6ENQ9.1 RecName: Full=30S ribosomal protein S7, chloroplastic >Q6L3C6.1 RecName: Full=30S ribosomal protein S7, chloroplastic >A1EA53.1 RecName: Full=30S ribosomal protein S7, chloropla	-
HORVU.MOREX.r2.1HG0007110	172.095	43.5804	268.565	52.6021	- && - && -	-
HORVU.MOREX.r2.2HG0134610	43.6042	25.6575	82.1447	27.5513	- && Q7XRV2.1 RecName: Full=Probable metal-nicotianamine transporter YSL6; AltName: Full=Protein YELLOW STRIPE LIKE 6; Short=OsYSL6 && PF03169:OPT oligopeptide transporter protein	OPT
HORVU.MOREX.r2.5HG0390770	3.65055	2.4851	9.29857	3.5294	- && P15280.4 RecName: Full=Glucose-1-phosphate adenylyltransferase small subunit, chloroplastic/amyloplastic; AltName: Full=ADP-glucose pyrophosphorylase; AltName: Full=ADP-glucose synthase; AltName: Full=AGPase B; AltName: Full=Alpha-D-glucose-1-phospha	-
HORVU.MOREX.r2.1HG0014960	1.60686	0.0428857	16.9353	0.264208	- && - && -	-
HORVU.MOREX.r2.5HG0411900	43.7449	28.3288	66.5858	30.2899	- && Q8LDW8.1 RecName: Full=Probable hydroxyacylglutathione hydrolase 2, chloroplastic; AltName: Full=Glyoxalase 2-4; AltName: Full=Glyoxalase II; Short=Glx II; Flags: Precursor && PF16123:Hydroxyacylglutathione hydrolase C-terminus|PF00753:Metallo-beta-l	Lactamase_B
HORVU.MOREX.r2.2HG0150540	22.3891	6.13943	25.1171	5.95049	- && Q43210.1 RecName: Full=Phenylalanine ammonia-lyase && PF00221:Aromatic amino acid lyase	-
novel.1081	0.487193	1.7404	0.628674	2.56098	- && - && -	-
HORVU.MOREX.r2.2HG0169700	6.92244	1.96227	8.61146	2.75563	- && Q9FN92.1 RecName: Full=Probable receptor-like protein kinase At5g59700; Flags: Precursor && PF12819:Carbohydrate-binding protein of the ER|PF07714:Protein tyrosine kinase	Pkinase_Tyr
HORVU.MOREX.r2.7HG0623050	12.44	17.7218	9.44647	19.2318	- && Q9LIR8.1 RecName: Full=F-box/kelch-repeat protein At3g23880 && PF00646:F-box domain|PF08268:F-box associated domain	F-box
HORVU.MOREX.r2.3HG0247910	22.741	11.4426	36.7859	12.3304	- && Q9FM85.1 RecName: Full=Probable receptor-like protein kinase At5g56460 && PF07714:Protein tyrosine kinase	Pkinase_Tyr
HORVU.MOREX.r2.5HG0389230	56.9267	38.452	95.0864	36.9713	- && Q9SJD4.1 RecName: Full=Long chain acyl-CoA synthetase 8 && PF00501:AMP-binding enzyme	AMP-binding
HORVU.MOREX.r2.4HG0328460	5.14524	6.68829	2.75609	9.01784	- && Q058P4.1 RecName: Full=U-box domain-containing protein 30; AltName: Full=Plant U-box protein 30 && PF04564:U-box domain	U-box
HORVU.MOREX.r2.7HG0582300	2.25734	3.91451	1.23349	3.88731	- && Q9FK33.1 RecName: Full=Pentatricopeptide repeat-containing protein At5g50390, chloroplastic; Flags: Precursor && PF13041:PPR repeat family|PF14432:DYW family of nucleic acid deaminases	-
HORVU.MOREX.r2.2HG0114520	17.2554	9.49661	26.1815	8.62212	- && Q0D5R3.1 RecName: Full=Cysteine-rich receptor-like protein kinase 6; Short=Cysteine-rich RLK6; Flags: Precursor && PF01657:Salt stress response/antifungal|PF07714:Protein tyrosine kinase	Pkinase_Tyr
HORVU.MOREX.r2.5HG0388370	7.3836	2.58398	34.9596	9.29317	- && Q9ZVN4.1 RecName: Full=Probable tyrosine-protein phosphatase At1g05000 && PF03162:Tyrosine phosphatase family	-
novel.26	0.0480329	0.183361	0	0.928614	- && - && -	-
HORVU.MOREX.r2.3HG0191650	14.4681	21.5751	5.19537	19.3277	- && A2WKP3.1 RecName: Full=Histone H2B.3 && PF00125:Core histone H2A/H2B/H3/H4	Histone
HORVU.MOREX.r2.6HG0491060	5.79895	5.18657	24.3651	8.17241	- && - && PF03760:Late embryogenesis abundant (LEA) group 1	-
HORVU.MOREX.r2.1HG0008950	75.1801	31.3941	137.707	42.6668	- && Q652Q8.1 RecName: Full=Probable uridine nucleosidase 2; AltName: Full=Uridine ribohydrolase 2 && PF01156:Inosine-uridine preferring nucleoside hydrolase	-
HORVU.MOREX.r2.6HG0495490	17.8911	25.7586	8.40316	24.0311	- && Q6H874.1 RecName: Full=DEAD-box ATP-dependent RNA helicase 47A && PF00271:Helicase conserved C-terminal domain|PF00270:DEAD/DEAH box helicase	DEAD
HORVU.MOREX.r2.7HG0560950	72.5155	40.593	108.217	47.9555	- && - && -	-
HORVU.MOREX.r2.3HG0247750	18.4403	10.418	35.9498	9.4307	- && P48522.1 RecName: Full=Trans-cinnamate 4-monooxygenase; AltName: Full=Cinnamic acid 4-hydroxylase; Short=C4H; Short=CA4H; AltName: Full=Cytochrome P450 73; AltName: Full=Cytochrome P450C4H [Catharanthus roseus] && PF00067:Cytochrome P450	p450
HORVU.MOREX.r2.5HG0444070	30.8638	21.8702	46.0104	19.0624	- && P0C042.1 RecName: Full=Uncharacterized protein At4g15970 && PF03407:Nucleotide-diphospho-sugar transferase	-
HORVU.MOREX.r2.7HG0584630	17.5537	27.6639	11.535	31.9056	- && Q8LPG9.1 RecName: Full=Protein IQ-DOMAIN 14 && PF13178:Protein of unknown function (DUF4005)	-
HORVU.MOREX.r2.5HG0434960	0.410195	0.0877376	1.41906	0.130899	- && P25032.1 RecName: Full=DNA-binding protein EMBP-1; AltName: Full=Histone promoter-binding protein 1a(1); Short=HBP-1a(1) && PF00170:bZIP transcription factor	bZIP_1
HORVU.MOREX.r2.4HG0317550	23.531	38.7313	15.7206	41.384	- && Q8BZW8.1 RecName: Full=NHL repeat-containing protein 2 && PF13419:Haloacid dehalogenase-like hydrolase|PF01436:NHL repeat|PF13905:Thioredoxin-like	NHL
HORVU.MOREX.r2.7HG0566110	89.9515	77.5693	172.711	84.5672	- && - && -	-
HORVU.MOREX.r2.4HG0298820	28.238	18.8727	58.1634	20.8365	- && P52409.1 RecName: Full=Glucan endo-1,3-beta-glucosidase; AltName: Full=(1->3)-beta-glucan endohydrolase; Short=(1->3)-beta-glucanase; AltName: Full=Beta-1,3-endoglucanase; Flags: Precursor && PF00332:Glycosyl hydrolases family 17|PF07983:X8 domain	Glyco_hydro_17
HORVU.MOREX.r2.5HG0357350	53.6921	43.3112	67.8839	31.0671	- && Q9ZSA8.1 RecName: Full=Protein DMR6-LIKE OXYGENASE 1; AltName: Full=2-oxoglutarate (2OG)-Fe(II) oxygenase-like protein DLO1; AltName: Full=Protein SENESCENCE-ASSOCIATED GENE 108; AltName: Full=Salicylate 3-hydroxylase DLO1; Short=S3H DLO1; Short=SA 3	2OG-FeII_Oxy
HORVU.MOREX.r2.4HG0325820	150.674	192.513	83.1467	201.833	- && K4BVL1.1 RecName: Full=Protein SPA, chloroplastic; AltName: Full=Sugar partition-affecting protein; Flags: Precursor && -	-
HORVU.MOREX.r2.3HG0186980	17.1032	8.70053	22.5658	8.01315	- && - && -	-
novel.866	1.01762	2.93167	1.01173	2.83054	- && - && -	-
HORVU.MOREX.r2.2HG0149690	2.43257	2.50347	0.10154	0.718128	- && O64477.1 RecName: Full=G-type lectin S-receptor-like serine/threonine-protein kinase At2g19130; Flags: Precursor && PF00069:Protein kinase domain|PF00954:S-locus glycoprotein domain|PF01453:D-mannose binding lectin|PF08276:PAN-like domain	Pkinase
HORVU.MOREX.r2.2HG0129530	545.149	212.294	746.909	238.145	- && P23586.2 RecName: Full=Sugar transport protein 1; AltName: Full=Glucose transporter; AltName: Full=Hexose transporter 1 && PF00083:Sugar (and other) transporter	Sugar_tr
HORVU.MOREX.r2.7HG0562700	87.9786	51.9515	140.941	42.8775	- && Q680K8.1 RecName: Full=BTB/POZ domain-containing protein At1g55760 && PF00651:BTB/POZ domain	BTB
HORVU.MOREX.r2.2HG0099630	2.89527	1.30505	3.56269	1.0121	- && O80528.1 RecName: Full=Serine/threonine-protein kinase haspin homolog; Short=AtHaspin && PF12330:Domain of unknown function (DUF3635)	-
novel.843	0.346287	0	1.50445	0.213387	- && - && -	-
HORVU.MOREX.r2.5HG0420850	9.96874	7.68969	18.8542	8.19776	- && - && PF00149:Calcineurin-like phosphoesterase	Metallophos
HORVU.MOREX.r2.7HG0545470	2.62621	5.58692	0.768372	6.24614	- && - && -	-
HORVU.MOREX.r2.5HG0410300	68.4114	53.9348	126.356	50.6166	- && Q9C942.1 RecName: Full=Caffeoylshikimate esterase; AltName: Full=Lysophospholipase 2; Short=LysoPL2 && PF12146:Serine aminopeptidase, S33	-
HORVU.MOREX.r2.3HG0275770	13.9847	5.84081	19.0595	6.7424	- && - && PF04749:PLAC8 family|PF11204:Protein of unknown function (DUF2985)	-
HORVU.MOREX.r2.7HG0602490	13.1808	20.3789	10.4483	25.8207	- && P46032.1 RecName: Full=Protein NRT1/ PTR FAMILY 8.3; Short=AtNPF8.3; AltName: Full=Histidine-transporting protein; AltName: Full=Peptide transporter PTR2 && PF00854:POT family	-
HORVU.MOREX.r2.6HG0526360	20.7685	6.21519	23.8209	6.22625	- && D7UPN3.1 RecName: Full=Chitin elicitor receptor kinase 1; Short=OsCERK1; AltName: Full=LysM domain receptor-like kinase 1; Short=LysM RLK1; Short=LysM-containing receptor-like kinase 1; Flags: Precursor && -	-
HORVU.MOREX.r2.3HG0253620	33.4499	21.1149	47.5057	20.0448	- && Q9LY46.1 RecName: Full=Protein ESKIMO 1; AltName: Full=Protein trichome birefringence-like 29 && PF14416:PMR5 N terminal Domain|PF13839:GDSL/SGNH-like Acyl-Esterase family found in Pmr5 and Cas1p	-
HORVU.MOREX.r2.5HG0352750	6.14657	3.05034	8.76677	2.97263	- && - && PF08263:Leucine rich repeat N-terminal domain|PF13855:Leucine rich repeat	LRRNT_2
HORVU.MOREX.r2.3HG0229290	61.6215	43.0268	87.7848	37.5529	- && Q9T0A0.1 RecName: Full=Long chain acyl-CoA synthetase 4 && PF00501:AMP-binding enzyme	AMP-binding
HORVU.MOREX.r2.6HG0490720	0.477231	1.08763	0.32904	1.32242	- && - && PF12796:Ankyrin repeats (3 copies)|PF13857:Ankyrin repeats (many copies)	-
HORVU.MOREX.r2.3HG0234730	21.0712	8.61235	36.1699	8.50522	- && Q5N8J1.1 RecName: Full=Bidirectional sugar transporter SWEET2b; Short=OsSWEET2b >B8A833.1 RecName: Full=Bidirectional sugar transporter SWEET2b; Short=OsSWEET2b && PF03083:Sugar efflux transporter for intercellular exchange	-
HORVU.MOREX.r2.1HG0037430	120.74	182.549	82.3702	211.537	- && Q42843.1 RecName: Full=Glutamyl-tRNA reductase 1, chloroplastic; Short=GluTR; Flags: Precursor && PF00745:Glutamyl-tRNAGlu reductase, dimerisation domain|PF01488:Shikimate / quinate 5-dehydrogenase|PF05201:Glutamyl-tRNAGlu reductase, N-terminal domai	-
HORVU.MOREX.r2.2HG0140860	76.4154	32.3814	129.599	31.3589	- && B9FSC8.1 RecName: Full=Putative 12-oxophytodienoate reductase 11; AltName: Full=OPDA-reductase 11; Short=OsOPR11 && PF00724:NADH:flavin oxidoreductase / NADH oxidase family	Oxidored_FMN
HORVU.MOREX.r2.3HG0228140	319.725	180.872	424.987	153.982	- && - && -	-
HORVU.MOREX.r2.6HG0521260	2.18202	1.33314	15.2667	5.09116	- && Q6K991.1 RecName: Full=Phosphate transporter PHO1-2; AltName: Full=Protein PHO1-2; Short=OsPHO1;2 && PF03105:SPX domain|PF03124:EXS family	SPX
HORVU.MOREX.r2.7HG0589170	0.0341327	0.138807	0.68437	0	- && - && -	-
HORVU.MOREX.r2.4HG0313740	81.7408	131.26	43.306	152.265	- && Q9ZUU4.1 RecName: Full=RNA-binding protein CP29B, chloroplastic; AltName: Full=Ribonucleoprotein At2g37220; Flags: Precursor && PF00076:RNA recognition motif. (a.k.a. RRM, RBD, or RNP domain)	RRM_1
HORVU.MOREX.r2.1HG0007530	1.23176	0.314026	2.37042	0.630804	- && - && PF08263:Leucine rich repeat N-terminal domain	LRRNT_2
HORVU.MOREX.r2.7HG0596530	44.2228	36.0487	130.743	41.067	- && - && -	-
HORVU.MOREX.r2.4HG0282100	2.70955	5.70208	2.85806	7.45777	- && - && PF06101:Plant protein of unknown function (DUF946)	-
HORVU.MOREX.r2.2HG0137480	2.45284	0.759867	6.38059	0.4956	- && - && -	-
HORVU.MOREX.r2.1HG0063760	0.0903762	0.033464	0.561414	0.0377419	- && Q8RXD4.1 RecName: Full=Protein BREAST CANCER SUSCEPTIBILITY 1 homolog; Short=AtBRCA1 && PF13920:Zinc finger, C3HC4 type (RING finger)|PF00533:BRCA1 C Terminus (BRCT) domain|PF13771:PHD-like zinc-binding domain	BRCT
HORVU.MOREX.r2.3HG0197030	4.64176	1.68842	4.82777	1.49675	- && Q9LXG8.1 RecName: Full=Probable WRKY transcription factor 72; AltName: Full=WRKY DNA-binding protein 72 && PF03106:WRKY DNA -binding domain	WRKY
HORVU.MOREX.r2.2HG0102030	48.9258	25.0612	80.0953	24.2021	- && Q7XI45.1 RecName: Full=Signal peptidase complex-like protein DTM1; AltName: Full=Protein DEFECTIVE TAPETUM AND MEIOCYTES 1; Flags: Precursor && PF06645:Microsomal signal peptidase 12 kDa subunit (SPC12)	-
HORVU.MOREX.r2.4HG0280860	198.226	261.177	142.249	295.766	- && Q9LDY5.1 RecName: Full=Peptidyl-prolyl cis-trans isomerase FKBP17-2, chloroplastic; Short=PPIase FKBP17-2; AltName: Full=FK506-binding protein 17-2; Short=AtFKBP17-2; AltName: Full=Immunophilin FKBP17-2; AltName: Full=Rotamase; Flags: Precursor && PF	FKBP_C
HORVU.MOREX.r2.2HG0083600	2.95373	4.46335	1.20607	4.88134	- && Q43257.1 RecName: Full=indole-2-monooxygenase; AltName: Full=Cytochrome P450 71C4; AltName: Full=Protein benzoxazineless 2 && PF00067:Cytochrome P450	p450
HORVU.MOREX.r2.7HG0538400	5.91941	10.1834	2.94794	8.43564	- && Q84MB3.1 RecName: Full=1-aminocyclopropane-1-carboxylate oxidase homolog 1 && PF03171:2OG-Fe(II) oxygenase superfamily	2OG-FeII_Oxy
HORVU.MOREX.r2.2HG0096210	119.651	220.255	72.8093	213.28	- && Q69RJ0.2 RecName: Full=Ferredoxin-dependent glutamate synthase, chloroplastic; AltName: Full=Fd-GOGAT; Flags: Precursor && PF01493:GXGXG motif|PF00310:Glutamine amidotransferases class-II|PF01645:Conserved region in glutamate synthase|PF04898:Glutama	GATase_2
HORVU.MOREX.r2.6HG0514840	40.661	40.2164	108.066	44.1412	- && Q9LVJ1.1 RecName: Full=Subtilisin-like protease SBT1.4; AltName: Full=Subtilase subfamily 1 member 4; Short=AtSBT1.4; Flags: Precursor && PF00082:Subtilase family|PF05922:Peptidase inhibitor I9|PF02225:PA domain	Peptidase_S8
HORVU.MOREX.r2.5HG0412970	18.6503	11.3932	26.4771	10.5579	- && Q9LEX0.1 RecName: Full=F-box protein PP2-A13; AltName: Full=Protein PHLOEM PROTEIN 2-LIKE A13; Short=AtPP2-A13; AltName: Full=SKP1-interacting partner 9 && PF14299:Phloem protein 2	-
HORVU.MOREX.r2.5HG0400930	13.7462	25.891	6.61437	21.4743	- && Q6ER21.2 RecName: Full=Zinc-finger homeodomain protein 9; Short=OsZHD9 && PF04770:ZF-HD protein dimerisation region	ZF-HD_dimer
HORVU.MOREX.r2.3HG0263950	5.20217	3.83277	7.77767	1.78899	- && Q8RVH5.1 RecName: Full=Basic 7S globulin 2; AltName: Full=SBg7S; Short=Bg; Contains: RecName: Full=Basic 7S globulin 2 high kDa subunit; Contains: RecName: Full=Basic 7S globulin 2 low kDa subunit; Flags: Precursor && PF14543:Xylanase inhibitor N-ter	-
HORVU.MOREX.r2.2HG0102830	53.1455	91.6967	27.7078	69.3702	- && Q9XF63.1 RecName: Full=RING-H2 finger protein ATL3; AltName: Full=RING-type E3 ubiquitin transferase ATL3 && PF13639:Ring finger domain	-
HORVU.MOREX.r2.3HG0187660	5.63295	2.81806	17.4418	4.20914	- && - && -	-
HORVU.MOREX.r2.2HG0162590	2.76499	1.56725	6.41578	1.64578	- && - && -	-
HORVU.MOREX.r2.3HG0244310	4.02972	1.74854	5.67569	2.18176	- && - && -	-
HORVU.MOREX.r2.1HG0018860	2.19708	3.42307	1.66041	4.51619	- && - && -	-
HORVU.MOREX.r2.3HG0205450	0.242218	0.467331	0.201921	0.944457	- && Q9SUQ3.1 RecName: Full=Probable inactive receptor kinase At4g23740; Flags: Precursor && PF08263:Leucine rich repeat N-terminal domain|PF07714:Protein tyrosine kinase	Pkinase_Tyr
HORVU.MOREX.r2.4HG0338820	48.6344	26.8554	71.7838	21.6786	- && O80501.1 RecName: Full=Ras-related protein RABH1b; Short=AtRABH1b; AltName: Full=Ras-related protein Rab6A; Short=AtRab6A && PF00071:Ras family	Ras
HORVU.MOREX.r2.7HG0621950	17.0287	7.22386	59.6761	15.1464	- && Q6DJC8.1 RecName: Full=Transmembrane protein 53-B && PF05705:Eukaryotic protein of unknown function (DUF829)	-
HORVU.MOREX.r2.4HG0309140	0	3.22085	0.270971	3.88429	- && Q7XJ60.1 RecName: Full=Microtubule-associated protein RP/EB family member 1A; AltName: Full=APC-binding protein EB1A; AltName: Full=End-binding protein 1A; Short=AtEB1A; AltName: Full=Protein ATEB1 homolog 2; Short=AtEB1H2 && -	-
novel.738	0.274878	0.677088	0.0807841	0.85505	- && - && -	-
HORVU.MOREX.r2.7HG0619870	12.7138	35.8184	9.70603	32.9161	- && Q5Z9N5.1 RecName: Full=Leucine-rich repeat receptor-like kinase protein FLORAL ORGAN NUMBER1; Short=OsFON1; AltName: Full=CLV1-like LRR receptor kinase; Flags: Precursor && PF00069:Protein kinase domain|PF13855:Leucine rich repeat|PF08263:Leucine ric	Pkinase
HORVU.MOREX.r2.1HG0069880	5.08368	3.26001	12.0141	3.59869	- && Q6I628.2 RecName: Full=CDP-diacylglycerol--serine O-phosphatidyltransferase 2; AltName: Full=Phosphatidylserine synthase 2 && PF03034:Phosphatidyl serine synthase	PSS
HORVU.MOREX.r2.6HG0466080	0.833302	0.379186	1.61285	0.330035	- && - && PF13855:Leucine rich repeat|PF08263:Leucine rich repeat N-terminal domain	LRRNT_2
HORVU.MOREX.r2.7HG0612320	99.2531	147.636	51.7737	173.976	- && Q53RM0.1 RecName: Full=Magnesium-chelatase subunit ChlI, chloroplastic; Short=Mg-chelatase subunit I; AltName: Full=Mg-protoporphyrin IX chelatase subunit ChlI; AltName: Full=Protein CHLORINA 9; Flags: Precursor && PF01078:Magnesium chelatase, subuni	-
HORVU.MOREX.r2.4HG0341540	16.046	12.174	19.5605	8.28344	- && Q10S83.1 RecName: Full=Protein NLP1; Short=OsNLP1; AltName: Full=NIN-like protein 1; AltName: Full=Nodule inception protein-like protein 1 && PF02042:RWP-RK domain|PF00564:PB1 domain	RWP-RK
HORVU.MOREX.r2.5HG0383600	48.0733	25.8087	60.0181	25.3079	- && Q2RB28.1 RecName: Full=Mini zinc finger protein 1; Short=OsMIF1 >B8BIU8.1 RecName: Full=Mini zinc finger protein 1 && PF04770:ZF-HD protein dimerisation region	ZF-HD_dimer
HORVU.MOREX.r2.5HG0367910	396.665	130.383	612.92	122.049	- && Q08407.3 RecName: Full=Major pollen allergen Cor a 1 isoforms 5, 6, 11 and 16; AltName: Full=Allergen Cor a I; AltName: Allergen=Cor a 1 && PF00407:Pathogenesis-related protein Bet v I family	-
HORVU.MOREX.r2.6HG0506720	32.9679	59.4706	18.3992	60.3943	- && - && PF09273:Rubisco LSMT substrate-binding|PF00856:SET domain	SET
HORVU.MOREX.r2.2HG0141720	0.989865	0.185387	5.85592	1.02662	- && - && -	-
HORVU.MOREX.r2.1HG0057270	4.69831	1.22284	15.7241	2.3358	- && - && -	-
HORVU.MOREX.r2.3HG0194410	24.0376	17.8092	41.8665	16.2415	- && Q0WPK3.1 RecName: Full=Autophagy-related protein 18d; Short=AtATG18d && -	-
HORVU.MOREX.r2.5HG0373950	343.275	559.095	271.71	673.115	- && Q02028.1 RecName: Full=Stromal 70 kDa heat shock-related protein, chloroplastic; Flags: Precursor && PF10712:NAD-specific glutamate dehydrogenase|PF00012:Hsp70 protein	HSP70
HORVU.MOREX.r2.1HG0029020	869.077	1203.98	334.069	1619.84	- && Q40004.1 RecName: Full=Ribulose bisphosphate carboxylase small chain, chloroplastic; Short=RuBisCO small subunit; Flags: Precursor && PF12338:Ribulose-1,5-bisphosphate carboxylase small subunit|PF00101:Ribulose bisphosphate carboxylase, small chain	-
HORVU.MOREX.r2.7HG0548890	23.6899	15.3858	31.6324	12.0796	- && Q40062.3 RecName: Full=2'-deoxymugineic-acid 2'-dioxygenase; AltName: Full=Protein iron deficiency-specific 3 && PF03171:2OG-Fe(II) oxygenase superfamily|PF14226:non-haem dioxygenase in morphine synthesis N-terminal	2OG-FeII_Oxy
HORVU.MOREX.r2.1HG0011430	10.3503	16.3529	7.04976	18.7708	- && - && -	-
HORVU.MOREX.r2.2HG0131320	67.882	91.9683	42.7938	99.3404	- && O23342.1 RecName: Full=Preprotein translocase subunit SECE1; Flags: Precursor && -	-
HORVU.MOREX.r2.5HG0436750	12.5142	8.18925	17.5193	6.85925	- && Q9SF09.1 RecName: Full=Amino acid transporter ANT1; AltName: Full=Aromatic and neutral amino acid transporter 1 && PF01490:Transmembrane amino acid transporter protein	Aa_trans
HORVU.MOREX.r2.2HG0156300	15.598	25.561	8.11394	28.3683	- && - && PF13419:Haloacid dehalogenase-like hydrolase	-
HORVU.MOREX.r2.3HG0194100	2.70337	4.37589	0.901463	3.69368	- && Q94A02.1 RecName: Full=Tryptophan aminotransferase-related protein 2 && PF04864:Allinase	-
HORVU.MOREX.r2.6HG0489930	392.244	563.148	245.355	661.384	- && Q43467.1 RecName: Full=Elongation factor Tu, chloroplastic; Short=EF-Tu; Flags: Precursor && PF00009:Elongation factor Tu GTP binding domain|PF03144:Elongation factor Tu domain 2|PF03143:Elongation factor Tu C-terminal domain	GTP_EFTU
HORVU.MOREX.r2.4HG0316820	69.6341	50.2572	114.996	44.3169	- && Q6IVC3.1 RecName: Full=Transcription factor TGA2.2; AltName: Full=OsNIF1; AltName: Full=OsbZIP1; AltName: Full=bZIP transcription factor 28; Short=OsbZIP28 && PF14144:Seed dormancy control|PF00170:bZIP transcription factor	bZIP_1
HORVU.MOREX.r2.6HG0476250	100.78	132.695	61.8736	213.391	- && Q7F8S5.1 RecName: Full=Peroxiredoxin-2E-2, chloroplastic; AltName: Full=Peroxiredoxin IIE-2; AltName: Full=Thioredoxin reductase 2E-2; Flags: Precursor && PF08534:Redoxin	-
HORVU.MOREX.r2.1HG0063430	1.40831	0.810556	2.01232	0.359941	- && A2X4M8.1 RecName: Full=Inositol-tetrakisphosphate 1-kinase 4; AltName: Full=Inositol 1,3,4-trisphosphate 5/6-kinase 4; Short=Inositol-triphosphate 5/6-kinase 4; Short=Ins(1,3,4)P(3) 5/6-kinase 4; Short=OsITP5/6K-4; Short=OsITPK4 && PF05770:Inositol 1	-
HORVU.MOREX.r2.UnG0633170	0	0	1.01806	0	- && P14895.1 RecName: Full=High molecular mass early light-inducible protein HV58, chloroplastic; Short=ELIP; Flags: Precursor && PF00504:Chlorophyll A-B binding protein	-
HORVU.MOREX.r2.1HG0014200	367.872	213.4	705.732	222.368	- && Q0DKW8.1 RecName: Full=Hydrophobic protein LTI6B; AltName: Full=Low temperature-induced protein 6B >A2Y075.2 RecName: Full=Hydrophobic protein LTI6B; AltName: Full=Low temperature-induced protein 6B && PF01679:Proteolipid membrane potential modulator	-
novel.1707	2.51171	2.93682	1.10311	4.8362	- && - && -	-
HORVU.MOREX.r2.2HG0146670	2.01055	0.702409	6.20123	0.588974	- && Q9SXZ2.2 RecName: Full=Protein FLOWERING LOCUS T && PF01161:Phosphatidylethanolamine-binding protein	-
novel.1502	70.5798	22.6197	142.799	30.7237	- && - && -	-
HORVU.MOREX.r2.6HG0474930	41.0678	16.0181	43.5401	10.5396	- && - && PF12697:Alpha/beta hydrolase family	-
novel.1555	0.560266	0.175166	1.33464	0.201016	- && - && -	-
HORVU.MOREX.r2.6HG0496940	12.8916	8.43863	26.7261	8.63837	- && Q9LTC0.1 RecName: Full=Probable receptor-like protein kinase At5g47070 && PF07714:Protein tyrosine kinase	Pkinase_Tyr
HORVU.MOREX.r2.6HG0523560	0.457868	0.07483	1.28434	0.098818	- && - && -	-
HORVU.MOREX.r2.7HG0549680	6.01459	3.50297	12.4578	3.93649	- && Q84RK2.2 RecName: Full=Fatty-acid-binding protein 2; Short=AtFAP2; AltName: Full=Chalcone-flavanone isomerase family protein 2 && PF02431:Chalcone-flavanone isomerase	-
HORVU.MOREX.r2.3HG0238770	3.64544	2.34873	5.58263	2.48216	- && Q94AA4.1 RecName: Full=ATP-dependent 6-phosphofructokinase 3; Short=ATP-PFK 3; Short=Phosphofructokinase 3; AltName: Full=Phosphohexokinase 3 && PF00365:Phosphofructokinase	PFK
HORVU.MOREX.r2.3HG0195670	18.2916	12.4182	45.503	16.4888	- && A2XFI3.2 RecName: Full=Pyruvate decarboxylase 2; Short=PDC && PF02775:Thiamine pyrophosphate enzyme, C-terminal TPP binding domain|PF00205:Thiamine pyrophosphate enzyme, central domain|PF02776:Thiamine pyrophosphate enzyme, N-terminal TPP binding dom	TPP_enzyme_N
HORVU.MOREX.r2.3HG0253550	0.254075	0.319366	1.96036	0.3495	- && Q9SIZ6.1 RecName: Full=GDSL esterase/lipase At2g40250; AltName: Full=Extracellular lipase At2g40250; Flags: Precursor && PF00657:GDSL-like Lipase/Acylhydrolase	Lipase_GDSL
HORVU.MOREX.r2.2HG0161520	342.297	496.515	179.949	576.961	- && P54260.1 RecName: Full=Aminomethyltransferase, mitochondrial; AltName: Full=Glycine cleavage system T protein; Short=GCVT; Flags: Precursor && PF08669:Glycine cleavage T-protein C-terminal barrel domain|PF01571:Aminomethyltransferase folate-binding d	GCV_T
HORVU.MOREX.r2.5HG0438530	136.847	310.839	88.1582	267.224	- && - && PF00228:Bowman-Birk serine protease inhibitor family	-
HORVU.MOREX.r2.3HG0197340	1.16	0.434112	7.94868	2.00476	- && P24631.1 RecName: Full=17.5 kDa class II heat shock protein && PF00011:Hsp20/alpha crystallin family	-
HORVU.MOREX.r2.1HG0021200	4.59865	6.89449	1.09155	5.35234	- && - && -	-
HORVU.MOREX.r2.1HG0017950	9.1668	4.89584	24.0506	8.79796	- && Q43257.1 RecName: Full=indole-2-monooxygenase; AltName: Full=Cytochrome P450 71C4; AltName: Full=Protein benzoxazineless 2 && PF00067:Cytochrome P450	p450
HORVU.MOREX.r2.6HG0515070	50.9775	69.4131	34.6032	87.4992	- && O65282.2 RecName: Full=20 kDa chaperonin, chloroplastic; AltName: Full=Chaperonin 10; Short=Ch-CPN10; Short=Cpn10; AltName: Full=Chaperonin 20; AltName: Full=Protein Cpn21; Flags: Precursor && PF00166:Chaperonin 10 Kd subunit	-
HORVU.MOREX.r2.3HG0189070	19.5458	35.2095	11.6447	41.7586	- && B8AD72.1 RecName: Full=Probable zinc metalloprotease EGY2, chloroplastic; AltName: Full=Protein ETHYLENE-DEPENDENT GRAVITROPISM-DEFICIENT AND YELLOW-GREEN 2; Flags: Precursor && PF02163:Peptidase family M50	Peptidase_M50
HORVU.MOREX.r2.7HG0527170	5506.09	8557.7	2508.09	9780.25	- && P08248.1 RecName: Full=Plastocyanin, chloroplastic; Flags: Precursor && PF00127:Copper binding proteins, plastocyanin/azurin family	-
HORVU.MOREX.r2.5HG0434300	10.2466	16.3906	6.54137	16.9917	- && - && PF05910:Plant protein of unknown function (DUF868)	-
HORVU.MOREX.r2.7HG0621830	0.460646	0	1.52871	0	- && Q9SJ54.1 RecName: Full=NDR1/HIN1-like protein 12 && PF03168:Late embryogenesis abundant protein	-
novel.1712	1.85909	2.43756	0.424232	2.61339	- && - && -	-
HORVU.MOREX.r2.4HG0339840	8.76865	3.71975	14.7666	3.73245	- && Q8VZJ9.1 RecName: Full=Calmodulin-binding receptor-like cytoplasmic kinase 2 && PF00069:Protein kinase domain	Pkinase
HORVU.MOREX.r2.3HG0245410	0.240352	0.828367	0.122073	2.17036	- && Q94ID6.1 RecName: Full=Ethylene-responsive transcription factor 12; Short=AtERF12; AltName: Full=Ethylene-responsive element-binding factor 12; Short=EREBP-12 && PF00847:AP2 domain	AP2
HORVU.MOREX.r2.4HG0344960	10.7842	2.62928	19.5305	4.96736	- && Q20390.2 RecName: Full=Palmitoyl-protein thioesterase 1; Short=PPT-1; AltName: Full=Palmitoyl-protein hydrolase 1; Flags: Precursor && PF02089:Palmitoyl protein thioesterase	-
HORVU.MOREX.r2.1HG0077160	10.3329	86.414	6.49613	178.073	- && P80022.2 RecName: Full=Extracellular ribonuclease LE; Short=RNase LE; Flags: Precursor && PF00445:Ribonuclease T2 family	Ribonuclease_T2
HORVU.MOREX.r2.2HG0165160	7.81933	5.50346	12.5261	3.77911	- && - && -	-
HORVU.MOREX.r2.4HG0288160	4.09961	13.3717	3.26209	9.67666	- && Q0ITS8.1 RecName: Full=60S ribosomal protein L10-1; AltName: Full=Protein QM; AltName: Full=Putative tumor suppressor SC34 >A2ZCQ7.2 RecName: Full=60S ribosomal protein L10-1; AltName: Full=Protein QM; AltName: Full=Putative tumor suppressor SC34 &&	-
HORVU.MOREX.r2.1HG0020800	69.2639	31.072	78.5322	30.3336	- && Q9SD81.1 RecName: Full=Glycerophosphodiester phosphodiesterase GDPD6; AltName: Full=Glycerophosphodiester phosphodiesterase 6; Short=ATGDPD6; Flags: Precursor && PF03009:Glycerophosphoryl diester phosphodiesterase family	-
HORVU.MOREX.r2.1HG0045900	27.7411	34.2491	12.6903	41.2574	- && Q07423.1 RecName: Full=Hexose carrier protein HEX6 && PF00083:Sugar (and other) transporter	Sugar_tr
HORVU.MOREX.r2.2HG0158440	21.2808	24.2085	9.36935	22.9554	- && Q7XLD4.2 RecName: Full=Zinc transporter 3; AltName: Full=ZRT/IRT-like protein 3; Short=OsZIP3; Flags: Precursor && PF02535:ZIP Zinc transporter	-
HORVU.MOREX.r2.5HG0349340	0.259193	0.531118	0.0826307	0.53034	- && O65238.2 RecName: Full=G-type lectin S-receptor-like serine/threonine-protein kinase At5g35370; Flags: Precursor && PF01453:D-mannose binding lectin|PF00069:Protein kinase domain	Pkinase
HORVU.MOREX.r2.2HG0140130	11.2996	14.6065	7.40501	16.1514	- && - && PF02576:Putative ribosome maturation factor RimP	-
HORVU.MOREX.r2.2HG0090190	1.04036	1.99745	0.645211	1.67412	- && Q2QAV0.1 RecName: Full=Serine/threonine-protein kinase TIO; AltName: Full=Fused homolog; Short=AtFUSED; AltName: Full=Protein TWO-IN-ONE; Short=AtTIO && PF00069:Protein kinase domain|PF13646:HEAT repeats	Pkinase
HORVU.MOREX.r2.7HG0600800	1.47877	1.42975	0.332148	1.72026	- && Q9M2P8.1 RecName: Full=VQ motif-containing protein 25; Short=AtVQ25 && PF05678:VQ motif	-
HORVU.MOREX.r2.1HG0052300	0.31512	1.34831	0.185098	1.48905	- && Q8RU31.1 RecName: Full=MADS-box transcription factor 21; AltName: Full=OsMADS21; AltName: Full=RMADS207 && PF01486:K-box region|PF00319:SRF-type transcription factor (DNA-binding and dimerisation domain)	K-box
HORVU.MOREX.r2.5HG0358060	13.3654	8.72017	19.7758	7.30424	- && Q9LXA5.1 RecName: Full=L-type lectin-domain containing receptor kinase IX.1; Short=LecRK-IX.1; Flags: Precursor && PF00069:Protein kinase domain|PF13947:Wall-associated receptor kinase galacturonan-binding	Pkinase
novel.655	8.86364	4.32392	11.6207	3.99263	- && - && -	-
HORVU.MOREX.r2.7HG0591640	271.106	110.911	651.956	167.943	- && A5H8G4.1 RecName: Full=Peroxidase 1; AltName: Full=Plasma membrane-bound peroxidase 1; Short=pmPOX1; Flags: Precursor && PF00141:Peroxidase	-
HORVU.MOREX.r2.6HG0479090	71.1829	48.0177	80.853	33.8763	- && - && PF00641:Zn-finger in Ran binding protein and others	zf-RanBP
HORVU.MOREX.r2.3HG0200650	17.1483	25.1525	10.4167	22.6395	- && Q06398.2 RecName: Full=Probable glutathione S-transferase GSTU6; AltName: Full=28 kDa cold-induced protein && PF13410:Glutathione S-transferase, C-terminal domain|PF13417:Glutathione S-transferase, N-terminal domain	-
HORVU.MOREX.r2.7HG0583940	4.25513	7.09309	2.77564	7.50514	- && Q8VYJ2.1 RecName: Full=AT-hook motif nuclear-localized protein 1 && PF03479:Domain of unknown function (DUF296)	-
HORVU.MOREX.r2.1HG0060640	0.532744	0	1.58945	0.0374752	- && Q3EAL1.1 RecName: Full=Transcription repressor OFP6; AltName: Full=Ovate family protein 6; Short=AtOFP6 && PF04844:Transcriptional repressor, ovate	-
HORVU.MOREX.r2.4HG0291220	2086.55	3785.48	1067.77	4057.7	- && Q40677.2 RecName: Full=Fructose-bisphosphate aldolase, chloroplastic; AltName: Full=Chloroplastic aldolase; Short=AldP; Flags: Precursor && PF00274:Fructose-bisphosphate aldolase class-I	-
HORVU.MOREX.r2.5HG0446930	34.2095	54.6199	21.5248	54.1611	- && - && PF07386:Protein of unknown function (DUF1499)	-
HORVU.MOREX.r2.5HG0433970	310.381	85.2873	490.357	118.164	- && Q10BU2.1 RecName: Full=Germin-like protein 3-7; AltName: Full=Germin-like protein 7; Short=OsGER7; Flags: Precursor && PF00190:Cupin	-
HORVU.MOREX.r2.5HG0413010	1.75354	4.53058	1.12872	4.32359	- && Q6NMK1.1 RecName: Full=Glucuronoxylan 4-O-methyltransferase 1 && PF04669:Polysaccharide biosynthesis	-
HORVU.MOREX.r2.3HG0193390	14.9678	8.05939	26.4599	4.84356	- && Q8LAC4.1 RecName: Full=Probable uridine nucleosidase 2; AltName: Full=Uridine ribohydrolase 2 && PF01156:Inosine-uridine preferring nucleoside hydrolase	-
HORVU.MOREX.r2.1HG0075680	1.762	0.956571	5.98667	2.0215	- && P93479.1 RecName: Full=Reticuline oxidase; AltName: Full=Berberine bridge-forming enzyme; Short=BBE; AltName: Full=Tetrahydroprotoberberine synthase; Flags: Precursor && PF01565:FAD binding domain|PF08031:Berberine and berberine like	FAD_binding_4
HORVU.MOREX.r2.3HG0184770	38.5676	21.9906	76.4799	26.9055	- && O23081.2 RecName: Full=Cysteine-rich receptor-like protein kinase 41; Short=Cysteine-rich RLK41; Flags: Precursor && PF07714:Protein tyrosine kinase	Pkinase_Tyr
HORVU.MOREX.r2.4HG0335800	3.81442	5.51406	1.53454	4.01711	- && Q8H2J9.3 RecName: Full=Glycerol-3-phosphate dehydrogenase [NAD(+)], chloroplastic; Flags: Precursor && PF01210:NAD-dependent glycerol-3-phosphate dehydrogenase N-terminus|PF07479:NAD-dependent glycerol-3-phosphate dehydrogenase C-terminus	NAD_Gly3P_dh_C
HORVU.MOREX.r2.7HG0587300	45.1238	67.965	9.23031	48.4484	- && Q7XMK3.2 RecName: Full=Probable ascorbate-specific transmembrane electron transporter 2; AltName: Full=Cytochrome b561-2 && PF03188:Eukaryotic cytochrome b561	Cytochrom_B561
HORVU.MOREX.r2.7HG0596670	186.477	145.829	294.33	119.037	- && Q69XJ4.1 RecName: Full=Heme oxygenase 1, chloroplastic; AltName: Full=Protein PHOTOPERIODIC SENSITIVITY 5; Flags: Precursor && PF01126:Heme oxygenase	-
HORVU.MOREX.r2.3HG0193680	47.8342	39.1991	87.705	32.4368	- && - && -	-
HORVU.MOREX.r2.6HG0488170	78.8721	48.9666	125.252	51.9248	- && P49103.1 RecName: Full=Ras-related protein Rab-2-A && PF00071:Ras family	Ras
novel.1636	1.47451	0.2456	6.79725	0.777135	- && - && -	-
HORVU.MOREX.r2.2HG0098140	16.708	27.7784	13.5451	34.4385	- && Q9LT10.1 RecName: Full=Probable carboxylesterase 18; AltName: Full=AtCXE18 && PF07859:alpha/beta hydrolase fold	Abhydrolase_3
HORVU.MOREX.r2.7HG0533870	96.2498	63.0517	162.617	51.0008	- && Q5VRJ8.1 RecName: Full=Peroxisomal membrane protein 11-5; AltName: Full=OsPEX11-2; AltName: Full=OsPEX11-5; AltName: Full=Peroxin-11-5 && PF05648:Peroxisomal biogenesis factor 11 (PEX11)	-
HORVU.MOREX.r2.3HG0229370	23.4043	21.8057	7.32121	25.5912	- && Q9SUP6.1 RecName: Full=Probable WRKY transcription factor 53; AltName: Full=WRKY DNA-binding protein 53 && PF03106:WRKY DNA -binding domain	WRKY
HORVU.MOREX.r2.3HG0251430	8.64532	15.7913	4.37929	12.5641	- && Q9SND9.1 RecName: Full=Uncharacterized acetyltransferase At3g50280 && PF02458:Transferase family	-
HORVU.MOREX.r2.1HG0032670	5.2654	4.12145	9.47207	3.14025	- && Q6ICB0.1 RecName: Full=Desumoylating isopeptidase 1; Short=DeSI-1; AltName: Full=PPPDE peptidase domain-containing protein 2; AltName: Full=Protein FAM152B && PF05903:PPPDE putative peptidase domain	-
HORVU.MOREX.r2.2HG0138730	0	0.886018	0	1.34885	- && - && -	-
HORVU.MOREX.r2.3HG0244180	79.2674	45.3218	113.548	41.1876	- && Q7F613.1 RecName: Full=Secretory carrier-associated membrane protein 2; Short=RiSC; Short=Secretory carrier membrane protein 2 && PF04144:SCAMP family	-
HORVU.MOREX.r2.7HG0564490	1.94415	3.46227	0.948415	4.96259	- && - && -	-
HORVU.MOREX.r2.4HG0281040	68.6463	21.3968	143.134	36.1681	- && - && PF03398:Regulator of Vps4 activity in the MVB pathway	-
HORVU.MOREX.r2.4HG0294390	3.57005	1.01246	12.7952	1.79357	- && Q9SG92.1 RecName: Full=Methylesterase 17; Short=AtMES17; AltName: Full=Methyl indole-3-acetic acid esterase && PF00561:alpha/beta hydrolase fold	Abhydrolase_1
HORVU.MOREX.r2.4HG0283210	150.546	263.529	115.414	291.561	- && - && PF13911:AhpC/TSA antioxidant enzyme	-
HORVU.MOREX.r2.6HG0496370	11.3414	8.01366	26.6807	7.33551	- && Q9SHC8.1 RecName: Full=Vesicle-associated protein 1-2; AltName: Full=Plant VAP homolog 12; Short=AtPVA12; AltName: Full=VAMP-associated protein 1-2; Contains: RecName: Full=Vesicle-associated protein 1-2, N-terminally processed && PF00635:MSP (Major	Motile_Sperm
HORVU.MOREX.r2.3HG0207660	0.65832	0.234957	3.13096	0.182134	- && A2WMK1.1 RecName: Full=CASP-like protein 1C1-1; Short=OsCASPL1C1-1 && PF04535:Domain of unknown function (DUF588)	-
novel.457	0.576104	0.166478	3.51901	0.319317	- && - && -	-
HORVU.MOREX.r2.1HG0051480	5.39773	7.99884	3.56916	7.73997	- && Q5H7P5.4 RecName: Full=Mannosylglycoprotein endo-beta-mannosidase; Short=Endo-beta-mannosidase; Contains: RecName: Full=Mannosylglycoprotein endo-beta-mannosidase 31 kDa subunit; Contains: RecName: Full=Mannosylglycoprotein endo-beta-mannosidase 28 k	-
HORVU.MOREX.r2.4HG0322120	2246.69	3819.35	1456.9	4350.8	- && P31853.2 RecName: Full=ATP synthase subunit b', chloroplastic; AltName: Full=ATP synthase F(0) sector subunit b'; AltName: Full=ATPase subunit II; Flags: Precursor && PF00430:ATP synthase B/B' CF(0)	-
HORVU.MOREX.r2.4HG0327010	13.7247	3.37393	23.8302	3.8485	- && Q5PNY6.1 RecName: Full=U-box domain-containing protein 21; AltName: Full=Plant U-box protein 21 && PF04564:U-box domain	U-box
HORVU.MOREX.r2.4HG0278610	4.73381	1.94451	8.60205	2.33986	- && - && PF05678:VQ motif	-
novel.867	0.522608	0.143758	6.56149	0.470197	- && - && -	-
HORVU.MOREX.r2.5HG0444860	15.5615	5.34879	27.7973	12.7289	- && Q9LIG2.1 RecName: Full=Receptor-like protein kinase At3g21340; AltName: Full=Leucine-rich repeat receptor-like protein kinase At3g21340; Flags: Precursor && PF07714:Protein tyrosine kinase|PF13855:Leucine rich repeat|PF12819:Carbohydrate-binding prot	Pkinase_Tyr
HORVU.MOREX.r2.5HG0424420	74.0284	113.236	46.5338	96.6304	- && Q9FYS5.1 RecName: Full=HMG-Y-related protein A; Short=ZmHMGA; AltName: Full=High mobility group A protein && PF00538:linker histone H1 and H5 family	-
HORVU.MOREX.r2.3HG0224160	29.7876	18.4121	58.2251	18.9565	- && B9EXZ6.1 RecName: Full=Amino-acid permease BAT1 homolog && PF13520:Amino acid permease	-
HORVU.MOREX.r2.3HG0224740	1.74126	0.944578	6.70638	2.17422	- && Q54T49.1 RecName: Full=Acyl-protein thioesterase 1 homolog 1 && PF02230:Phospholipase/Carboxylesterase	Abhydrolase_2
HORVU.MOREX.r2.2HG0104830	13.3097	6.51208	19.9121	6.48729	- && Q9FW03.1 RecName: Full=Putative methylesterase 11, chloroplastic; Short=AtMES11; Flags: Precursor && PF00561:alpha/beta hydrolase fold	Abhydrolase_1
HORVU.MOREX.r2.2HG0158780	78.8319	119.755	45.8869	117.361	- && Q42840.1 RecName: Full=Oxygen-dependent coproporphyrinogen-III oxidase, chloroplastic; Short=Coprogen oxidase; Short=Coproporphyrinogenase; Flags: Precursor && PF01218:Coproporphyrinogen III oxidase	-
HORVU.MOREX.r2.5HG0374130	293.982	351.085	119.946	411.731	- && Q40677.2 RecName: Full=Fructose-bisphosphate aldolase, chloroplastic; AltName: Full=Chloroplastic aldolase; Short=AldP; Flags: Precursor && PF00274:Fructose-bisphosphate aldolase class-I	-
HORVU.MOREX.r2.1HG0068940	40.6067	32.8369	104.234	39.3779	- && - && PF07690:Major Facilitator Superfamily	MFS_1
HORVU.MOREX.r2.4HG0343480	300.059	444.739	187.021	471.753	- && Q9ZST0.2 RecName: Full=50S ribosomal protein L5, chloroplastic; Flags: Precursor && PF00673:ribosomal L5P family C-terminus|PF00281:Ribosomal protein L5	-
HORVU.MOREX.r2.7HG0593920	265.518	85.5098	537.954	129.366	- && - && PF12734:Cysteine-rich TM module stress tolerance	-
HORVU.MOREX.r2.5HG0370260	5.26927	17.6928	3.33154	13.701	- && - && -	-
HORVU.MOREX.r2.6HG0521980	12.8439	22.8976	7.26218	29.3478	- && Q08937.1 RecName: Full=29 kDa ribonucleoprotein B, chloroplastic; AltName: Full=CP29B; Flags: Precursor && PF00076:RNA recognition motif. (a.k.a. RRM, RBD, or RNP domain)	RRM_1
HORVU.MOREX.r2.4HG0285270	23.5257	37.1772	13.9055	41.6632	- && A2YUQ6.1 RecName: Full=Thioredoxin-like protein CITRX, chloroplastic; AltName: Full=Cf-9-interacting thioredoxin; Short=OsCiTrx; Flags: Precursor && PF00085:Thioredoxin	-
HORVU.MOREX.r2.1HG0054340	86.837	141.212	48.1236	158.805	- && - && PF09353:Domain of unknown function (DUF1995)	-
HORVU.MOREX.r2.2HG0083700	18.9054	30.9509	10.5712	31.0417	- && - && PF12680:SnoaL-like domain	-
HORVU.MOREX.r2.6HG0483080	9.1085	5.45874	9.33406	1.99929	- && - && -	-
HORVU.MOREX.r2.6HG0473310	51.6057	21.4607	66.5797	18.6884	- && Q9SLK2.1 RecName: Full=ALA-interacting subunit 3; Short=AtALIS3 && PF03381:LEM3 (ligand-effect modulator 3) family / CDC50 family	-
HORVU.MOREX.r2.3HG0227610	13.2349	6.28154	20.6267	6.61064	- && - && PF07816:Protein of unknown function (DUF1645)	-
HORVU.MOREX.r2.2HG0157770	0.148088	0.44552	0.0657413	0.425647	- && Q7XTS4.2 RecName: Full=Protein argonaute 2; Short=OsAGO2 && PF02171:Piwi domain|PF02170:PAZ domain|PF16486:N-terminal domain of argonaute	Piwi
HORVU.MOREX.r2.6HG0522760	15.3259	24.4301	13.1158	33.2774	- && Q93VK5.1 RecName: Full=Protein LUTEIN DEFICIENT 5, chloroplastic; AltName: Full=Cytochrome P450 97A3; Flags: Precursor && PF00067:Cytochrome P450	p450
HORVU.MOREX.r2.2HG0133360	7.99394	10.5924	5.36201	11.3485	- && Q8YUA3.1 RecName: Full=Putative ribosome biogenesis GTPase RsgA 1 && PF03193:Protein of unknown function, DUF258	-
HORVU.MOREX.r2.3HG0218290	37.6457	18.9874	58.1092	21.6344	- && Q9SQT8.1 RecName: Full=Bifunctional 3-dehydroquinate dehydratase/shikimate dehydrogenase, chloroplastic; Short=DHQ-SDH protein; AltName: Full=DHQase-SORase; AltName: Full=Protein EMBRYO DEFECTIVE 3004; Includes: RecName: Full=Dehydroquinate dehydrata	-
HORVU.MOREX.r2.1HG0041730	10.3851	15.0785	3.9801	17.121	- && - && -	-
HORVU.MOREX.r2.5HG0386860	122.219	69.0042	185.767	62.5297	- && Q2RBS4.2 RecName: Full=Autophagy-related protein 8D; AltName: Full=Autophagy-related ubiquitin-like modifier ATG8D && PF02991:Autophagy protein Atg8 ubiquitin like	-
HORVU.MOREX.r2.7HG0565960	4.88353	8.95394	2.38745	9.24496	- && Q9M2A1.2 RecName: Full=Pentatricopeptide repeat-containing protein At3g42630 && -	-
HORVU.MOREX.r2.6HG0500850	7.75361	11.3584	6.64631	13.9658	- && Q9SS97.2 RecName: Full=Putative pentatricopeptide repeat-containing protein At3g01580 && PF13041:PPR repeat family	-
HORVU.MOREX.r2.3HG0258970	17.9519	18.9978	8.45138	20.6505	- && P53750.1 RecName: Full=Uncharacterized hydrolase YNR064C && PF00561:alpha/beta hydrolase fold	Abhydrolase_1
HORVU.MOREX.r2.5HG0427970	33.6277	51.9627	17.9689	52.4236	- && Q9FI13.1 RecName: Full=Probable ribose-5-phosphate isomerase 4, chloroplastic; AltName: Full=Phosphoriboisomerase 4; Flags: Precursor && PF06026:Ribose 5-phosphate isomerase A (phosphoriboisomerase A)	Rib_5-P_isom_A
HORVU.MOREX.r2.5HG0402270	66.19	119.031	33.7808	150.303	- && Q0J1C1.1 RecName: Full=1-aminocyclopropane-1-carboxylate oxidase 1; Short=ACC oxidase 1; AltName: Full=Ethylene-forming enzyme; Short=EFE && PF03171:2OG-Fe(II) oxygenase superfamily|PF14226:non-haem dioxygenase in morphine synthesis N-terminal	2OG-FeII_Oxy
HORVU.MOREX.r2.3HG0237180	7.55657	12.0723	6.81985	13.8848	- && - && PF06911:Senescence-associated protein	-
HORVU.MOREX.r2.3HG0209250	41.2219	21.8047	75.0672	27.7049	- && - && -	-
HORVU.MOREX.r2.6HG0508460	1413.96	916.836	1945.86	796.822	- && Q06378.1 RecName: Full=Glutamine synthetase; AltName: Full=Cytoplasmic GS3; AltName: Full=Glutamate--ammonia ligase && PF00120:Glutamine synthetase, catalytic domain|PF03951:Glutamine synthetase, beta-Grasp domain	-
HORVU.MOREX.r2.1HG0062820	4.10698	9.40859	4.85882	14.4926	- && - && -	-
novel.1429	0.87792	0.471058	5.00485	1.60551	- && - && -	-
HORVU.MOREX.r2.1HG0054030	3.64648	4.69988	13.2172	5.13553	- && Q8L4N1.1 RecName: Full=Universal stress protein PHOS34; AltName: Full=Phosphorylated protein of 34 kDa; Short=AtPHOS34; Flags: Precursor && PF00582:Universal stress protein family	Usp
HORVU.MOREX.r2.6HG0523070	44.5437	23.3853	113.252	27.3912	- && Q9LP65.1 RecName: Full=Protein C2-DOMAIN ABA-RELATED 5 && -	-
HORVU.MOREX.r2.6HG0521020	9.93028	6.11997	13.8844	4.36921	- && Q9LMN8.2 RecName: Full=Wall-associated receptor kinase 3; Flags: Precursor && PF07714:Protein tyrosine kinase	Pkinase_Tyr
[truncated: 2,629 more rows]

## Sheet: OEvsWT_C_up
gene_id	WT_28C	OE_28C	WT_28D	OE_28D	gene_description	tf_family
HORVU.MOREX.r2.7HG0539530	14.0866	2834.56	12.8742	2781.9	- && B2LXS7.1 RecName: Full=Single-stranded DNA-binding protein WHY1, chloroplastic; AltName: Full=Protein WHIRLY 1; Short=ZmWHY1; Flags: Precursor && PF08536:Whirly transcription factor	-
HORVU.MOREX.r2.7HG0585880	0.456602	26.8029	0.817862	23.9563	- && Q5JLB5.2 RecName: Full=Zinc finger CCCH domain-containing protein 12; Short=OsC3H12; AltName: Full=Zinc finger CCCH domain-containing protein ZFN-like 2 && PF00642:Zinc finger C-x8-C-x5-C-x3-H type (and similar)	zf-CCCH
HORVU.MOREX.r2.5HG0411100	0.691067	25.6933	0.416789	22.9765	- && - && PF02362:B3 DNA binding domain	B3
HORVU.MOREX.r2.1HG0051090	0.493634	49.0939	0.139323	49.5203	- && - && -	-
novel.1006	0.459328	11.6713	0.271168	10.1069	- && P69668.1 RecName: Full=50S ribosomal protein L23, chloroplastic >A1EA51.1 RecName: Full=50S ribosomal protein L23-B, chloroplastic && -	-
HORVU.MOREX.r2.UnG0633470	1.45235	37.0813	0.721686	30.8488	- && A1E9L2.1 RecName: Full=30S ribosomal protein S18, chloroplastic && PF01084:Ribosomal protein S18	-
novel.1597	0.26604	10.0564	0.123643	11.7244	- && - && -	-
HORVU.MOREX.r2.UnG0635350	0.279585	16.8352	0.0786745	13.5807	- && Q76LL9.1 RecName: Full=Maturase K; AltName: Full=Intron maturase >Q76LM0.1 RecName: Full=Maturase K; AltName: Full=Intron maturase && PF01824:MatK/TrnK amino terminal region|PF01348:Type II intron maturase	-
HORVU.MOREX.r2.UnG0636270	560.214	3841.55	331.049	3283.28	- && Q6ENA6.3 RecName: Full=Photosystem I iron-sulfur center; AltName: Full=9 kDa polypeptide; AltName: Full=PSI-C; AltName: Full=Photosystem I subunit VII; AltName: Full=PsaC >Q6ENP6.3 RecName: Full=Photosystem I iron-sulfur center; AltName: Full=9 kDa p	-
novel.435	0.124201	5.05703	0.20305	3.85062	- && O82413.1 RecName: Full=Histidine--tRNA ligase, chloroplastic/mitochondrial; AltName: Full=Histidyl-tRNA synthetase; Short=HisRS; AltName: Full=Histidyl-tRNA synthetase 1; Short=AtHRS1; Flags: Precursor && -	-
novel.1082	0.0891494	4.17826	0.0598707	3.97293	- && O98691.1 RecName: Full=NAD(P)H-quinone oxidoreductase subunit H, chloroplastic; AltName: Full=NAD(P)H dehydrogenase subunit H; AltName: Full=NADH-plastoquinone oxidoreductase 49 kDa subunit; AltName: Full=NADH-plastoquinone oxidoreductase subunit H &	TPR_1
novel.1234	0.0901834	15.0891	0.104876	16.7022	- && - && -	-
HORVU.MOREX.r2.2HG0110920	0.0470245	40.1495	0.0958675	34.2435	- && - && -	-
HORVU.MOREX.r2.UnG0634920	0.221902	22.5739	0.218835	21.8221	- && A1EA58.1 RecName: Full=Cytochrome c biogenesis protein CcsA && PF01578:Cytochrome C assembly protein	-
HORVU.MOREX.r2.UnG0634190	38.4203	259.344	15.5554	224.279	- && O03060.2 RecName: Full=NAD(P)H-quinone oxidoreductase chain 4, chloroplastic; AltName: Full=NAD(P)H dehydrogenase, chain 4; AltName: Full=NADH-plastoquinone oxidoreductase chain 4 && -	-
HORVU.MOREX.r2.UnG0632750	3.1331	41.3645	2.0534	36.1475	- && Q6ENW6.1 RecName: Full=ATP synthase subunit alpha, chloroplastic; AltName: Full=ATP synthase F1 sector subunit alpha; AltName: Full=F-ATPase subunit alpha >A1E9S1.1 RecName: Full=ATP synthase subunit alpha, chloroplastic; AltName: Full=ATP synthase F	ATP-synt_ab
HORVU.MOREX.r2.UnG0635430	20.5551	115.355	11.5437	95.0357	- && Q6ENA6.3 RecName: Full=Photosystem I iron-sulfur center; AltName: Full=9 kDa polypeptide; AltName: Full=PSI-C; AltName: Full=Photosystem I subunit VII; AltName: Full=PsaC >Q6ENP6.3 RecName: Full=Photosystem I iron-sulfur center; AltName: Full=9 kDa p	-
HORVU.MOREX.r2.2HG0159460	0.131387	17.8208	0.168739	15.8155	- && - && -	-
novel.400	0.10109	1.65553	0.0697443	1.67612	- && Q9XPS5.1 RecName: Full=Uncharacterized protein ycf70; AltName: Full=ORF42 && -	-
novel.1771	0.147433	5.70711	0.149223	5.2448	- && - && -	-
HORVU.MOREX.r2.5HG0396600	4.24322	53.0618	3.92072	55.9773	- && - && -	-
HORVU.MOREX.r2.2HG0178200	0.00842788	4.77608	0	2.89317	- && - && PF00931:NB-ARC domain	NB-ARC
novel.1785	1.99121	17.7356	0.814809	13.5322	- && A1E9N8.1 RecName: Full=50S ribosomal protein L32, chloroplastic && -	-
HORVU.MOREX.r2.2HG0090880	0.383179	15.9346	0.0848353	14.9314	- && Q9SG80.1 RecName: Full=Alpha-L-arabinofuranosidase 1; Short=AtASD1; AltName: Full=Beta-D-xylosidase; Flags: Precursor && PF06964:Alpha-L-arabinofuranosidase C-terminus	-
novel.1781	0.615665	9.62251	0.350673	8.05326	- && P20175.1 RecName: Full=Photosystem II reaction center protein J; Short=PSII-J >Q6W6Q8.1 RecName: Full=Photosystem II reaction center protein J; Short=PSII-J >Q6W6R2.1 RecName: Full=Photosystem II reaction center protein J; Short=PSII-J && -	-
HORVU.MOREX.r2.6HG0487790	4.51996	37.9082	2.66391	34.9323	- && A1E9I8.1 RecName: Full=ATP synthase subunit alpha, chloroplastic; AltName: Full=ATP synthase F1 sector subunit alpha; AltName: Full=F-ATPase subunit alpha && PF00306:ATP synthase alpha/beta chain, C terminal domain|PF00006:ATP synthase alpha/beta fam	ATP-synt_ab
HORVU.MOREX.r2.UnG0635510	4.74257	67.013	2.68576	67.9564	- && P12119.3 RecName: Full=Cytochrome b6-f complex subunit 4; AltName: Full=17 kDa polypeptide >A1E9V5.1 RecName: Full=Cytochrome b6-f complex subunit 4; AltName: Full=17 kDa polypeptide >P12361.4 RecName: Full=Cytochrome b6-f complex subunit 4; AltName:	-
novel.325	0	27.0558	0	31.3459	- && - && -	-
HORVU.MOREX.r2.UnG0633480	0.629917	18.5779	0.4494	16.1671	- && Q95H54.3 RecName: Full=50S ribosomal protein L20, chloroplastic >A1E9L3.1 RecName: Full=50S ribosomal protein L20, chloroplastic && PF00453:Ribosomal protein L20	-
HORVU.MOREX.r2.6HG0489720	0.503101	7.86364	0.237825	5.95408	- && - && -	-
HORVU.MOREX.r2.UnG0633460	0.953325	24.7796	0.612597	19.1485	- && Q95H56.1 RecName: Full=50S ribosomal protein L33, chloroplastic >A1EA29.1 RecName: Full=50S ribosomal protein L33, chloroplastic >A1E9L1.1 RecName: Full=50S ribosomal protein L33, chloroplastic >A8Y9A7.1 RecName: Full=50S ribosomal protein L33, chlor	-
HORVU.MOREX.r2.5HG0426890	0	7.02178	0	6.64006	- && - && PF03004:Plant transposase (Ptta/En/Spm family)	-
novel.508	0	3.77417	0.0418675	7.77013	- && - && -	-
HORVU.MOREX.r2.1HG0006800	0.544305	17.4063	0.307251	13.5176	- && - && -	-
HORVU.MOREX.r2.7HG0529600	0.347779	4.14957	0.760961	4.45704	- && Q9SGH6.1 RecName: Full=Alpha-dioxygenase 1; Short=Alpha DOX1; AltName: Full=Fatty acid dioxygenase AlphaDOX1; AltName: Full=Pathogen-induced oxygenase; AltName: Full=Plant alpha dioxygenase 1; Flags: Precursor && PF03098:Animal haem peroxidase	An_peroxidase
HORVU.MOREX.r2.7HG0588570	1.4884	19.0448	0.69978	8.97553	- && - && -	-
novel.553	0.102822	2.26768	0.0540485	1.70456	- && A1E9I2.1 RecName: Full=DNA-directed RNA polymerase subunit beta'; AltName: Full=PEP; AltName: Full=Plastid-encoded RNA polymerase subunit beta'; Short=RNA polymerase subunit beta' && PF05000:RNA polymerase Rpb1, domain 4|PF00623:RNA polymerase Rpb1,	-
novel.882	0.498404	4.00174	0.462554	4.0171	- && - && -	-
HORVU.MOREX.r2.UnG0635360	0.313427	9.34183	0.109984	7.12351	- && O98693.2 RecName: Full=NAD(P)H-quinone oxidoreductase subunit 6, chloroplastic; AltName: Full=NAD(P)H dehydrogenase subunit 6; AltName: Full=NADH-plastoquinone oxidoreductase subunit 6 && PF00499:NADH-ubiquinone/plastoquinone oxidoreductase chain 6	-
novel.334	0	1.73741	0	1.33508	- && - && -	-
novel.1091	0	2.70751	0	2.96396	- && - && -	-
HORVU.MOREX.r2.5HG0351740	0.446717	12.6829	0.0607793	12.7913	- && Q85ZV6.1 RecName: Full=Maturase K; AltName: Full=Intron maturase && PF01824:MatK/TrnK amino terminal region	-
HORVU.MOREX.r2.4HG0279340	0.0375746	2.31107	0.162089	6.57932	- && P22180.1 RecName: Full=Plasma membrane ATPase 1; AltName: Full=Proton pump 1 && PF00690:Cation transporter/ATPase, N-terminus|PF00122:E1-E2 ATPase|PF00702:haloacid dehalogenase-like hydrolase	E1-E2_ATPase
HORVU.MOREX.r2.6HG0469520	0	39.8375	0.067961	24.9984	- && - && -	-
HORVU.MOREX.r2.4HG0302250	1.75229	15.5801	1.03951	10.172	- && - && PF13418:Galactose oxidase, central domain	-
novel.1379	0.704607	8.69686	0.902907	7.29871	- && - && PF04493:Endonuclease V	-
HORVU.MOREX.r2.UnG0628810	0.998607	11.5251	0.675844	12.1215	- && P20454.2 RecName: Full=Photosystem I assembly protein Ycf4 && PF02392:Ycf4	-
novel.600	1.06401	8.22149	0.526979	8.16687	- && - && -	-
HORVU.MOREX.r2.6HG0498800	0	13.6594	0	12.5238	- && - && -	-
HORVU.MOREX.r2.2HG0125580	0	17.7601	0	13.7539	- && - && -	-
novel.1411	0.19983	3.89348	0.294468	3.71075	- && O22285.1 RecName: Full=Probable methyltransferase PMT11 && -	-
novel.27	1.09407	10.3832	0.723058	9.4118	- && - && -	-
HORVU.MOREX.r2.4HG0346110	2.89024	24.8851	0.94714	29.6724	- && Q700E3.1 RecName: Full=Transcription factor bHLH27; AltName: Full=Basic helix-loop-helix protein 27; Short=AtbHLH27; Short=bHLH 27; AltName: Full=Transcription factor EN 42; AltName: Full=bHLH transcription factor bHLH027 && PF00010:Helix-loop-helix	HLH
HORVU.MOREX.r2.6HG0520340	0.163774	21.3378	0.100635	16.3738	- && - && -	-
HORVU.MOREX.r2.3HG0212380	0.211905	11.4628	0.407062	10.1648	- && - && -	-
HORVU.MOREX.r2.5HG0435440	0.964487	5.2501	0.798985	6.24702	- && O80939.1 RecName: Full=L-type lectin-domain containing receptor kinase IV.1; Short=Arabidopsis thaliana lectin-receptor kinase e; Short=AthlecRK-e; Short=LecRK-IV.1; AltName: Full=Lectin Receptor Kinase 1; Flags: Precursor && PF07714:Protein tyrosine	Pkinase_Tyr
HORVU.MOREX.r2.7HG0541090	0	4.38853	0	2.244	- && - && -	-
HORVU.MOREX.r2.2HG0134800	2.69606	24.2736	1.47904	25.8848	- && P69694.1 RecName: Full=Photosystem II reaction center protein K; Short=PSII-K; Flags: Precursor >P69693.1 RecName: Full=Photosystem II reaction center protein K; Short=PSII-K; Flags: Precursor && PF02533:Photosystem II 4 kDa reaction centre component	-
HORVU.MOREX.r2.7HG0602170	2.29348	13.772	0.773972	14.5908	- && - && -	-
HORVU.MOREX.r2.4HG0344450	4.05777	23.4649	5.81315	29.7225	- && Q53QK0.1 RecName: Full=Flavonoid O-methyltransferase-like protein Os11g0303600 && PF00891:O-methyltransferase|PF08100:Dimerisation domain	-
novel.886	0	1.76823	0	3.89454	- && - && -	-
HORVU.MOREX.r2.6HG0513160	0.861833	5.0244	2.43993	3.36801	- && P27968.1 RecName: Full=Nitrate reductase [NAD(P)H] && PF03404:Mo-co oxidoreductase dimerisation domain|PF00970:Oxidoreductase FAD-binding domain|PF00173:Cytochrome b5-like Heme/Steroid binding domain|PF00174:Oxidoreductase molybdopterin binding domai	NAD_binding_1
HORVU.MOREX.r2.1HG0040710	1.15124	5.46563	0.967918	6.22023	- && - && -	-
novel.344	0.173569	6.93555	0.123392	6.09192	- && - && -	-
novel.1238	0.00580347	1.3537	0.00323764	0.935504	- && - && -	-
HORVU.MOREX.r2.UnG0634660	0.56026	5.79246	0.206986	3.99905	- && A1E9M9.1 RecName: Full=30S ribosomal protein S3, chloroplastic && PF00189:Ribosomal protein S3, C-terminal domain	-
HORVU.MOREX.r2.2HG0129840	0.193668	4.95309	0.286627	7.44797	- && - && -	-
HORVU.MOREX.r2.UnG0636500	3.98907	31.9051	2.53011	27.1074	- && P69694.1 RecName: Full=Photosystem II reaction center protein K; Short=PSII-K; Flags: Precursor >P69693.1 RecName: Full=Photosystem II reaction center protein K; Short=PSII-K; Flags: Precursor && PF02533:Photosystem II 4 kDa reaction centre component	-
novel.278	0.590602	8.95274	0.0977237	5.26846	- && - && -	-
novel.795	2.41783	13.2974	1.49167	14.5747	- && - && PF04434:SWIM zinc finger	SWIM
HORVU.MOREX.r2.2HG0127660	0.245587	8.58702	0.103028	7.00009	- && Q7H6J0.1 RecName: Full=DNA-directed RNA polymerase subunit alpha; Short=PEP; AltName: Full=Plastid-encoded RNA polymerase subunit alpha; Short=RNA polymerase subunit alpha >Q7H6J1.1 RecName: Full=DNA-directed RNA polymerase subunit alpha; Short=PEP;	RNA_pol_L
HORVU.MOREX.r2.6HG0487780	3.28746	23.0109	2.66291	19.841	- && Q95H62.1 RecName: Full=30S ribosomal protein S14, chloroplastic >A1E9I9.1 RecName: Full=30S ribosomal protein S14, chloroplastic && PF00253:Ribosomal protein S14p/S29e	Ribosomal_S14
HORVU.MOREX.r2.2HG0130560	0	8.63477	0	6.00359	- && Q9XI05.2 RecName: Full=Proteasome subunit beta type-3-A; AltName: Full=20S proteasome beta subunit C-1; AltName: Full=Proteasome component T && -	-
HORVU.MOREX.r2.6HG0520330	0	2.72221	0	1.71712	- && - && -	-
HORVU.MOREX.r2.3HG0266360	0.663169	4.40782	0.870239	3.69799	- && Q10Q26.1 RecName: Full=B3 domain-containing protein Os03g0212300 && PF02362:B3 DNA binding domain	B3
novel.1389	0.207919	2.82303	0.129509	2.72335	- && A1EA56.1 RecName: Full=NAD(P)H-quinone oxidoreductase subunit 5, chloroplastic; AltName: Full=NAD(P)H dehydrogenase subunit 5; AltName: Full=NADH-plastoquinone oxidoreductase subunit 5 && PF00312:Ribosomal protein S15	-
HORVU.MOREX.r2.UnG0632780	0.181071	7.78819	0.0871422	6.20856	- && P12339.2 RecName: Full=30S ribosomal protein S7, chloroplastic >Q6ENQ9.1 RecName: Full=30S ribosomal protein S7, chloroplastic >Q6L3C6.1 RecName: Full=30S ribosomal protein S7, chloroplastic >A1EA53.1 RecName: Full=30S ribosomal protein S7, chloropla	-
HORVU.MOREX.r2.3HG0212390	0.165864	8.26916	0.213771	9.56903	- && - && -	-
novel.1064	0	6.01213	0.0270202	9.39219	- && - && -	-
novel.18	0.00604847	1.98968	0	1.59561	- && Q6AVI0.1 RecName: Full=Zinc finger BED domain-containing protein RICESLEEPER 2; AltName: Full=Transposase-like protein RICESLEEPER 2 && PF05699:hAT family C-terminal dimerisation region|PF14372:Domain of unknown function (DUF4413)	hATC
HORVU.MOREX.r2.6HG0455790	0	10.3081	0	9.50258	- && P68427.2 RecName: Full=Histone H3.2 >P68428.2 RecName: Full=Histone H3.2 >P68429.2 RecName: Full=Histone H3.2; AltName: Full=Histone H3.1; AltName: Full=Major histone H3 >P68430.2 RecName: Full=Histone H3.2 && PF00125:Core histone H2A/H2B/H3/H4	Histone
HORVU.MOREX.r2.7HG0591210	17.7157	50.6388	39.6984	91.595	- && Q88C93.1 RecName: Full=Phosphomannomutase/phosphoglucomutase; Short=PMM / PGM && PF02879:Phosphoglucomutase/phosphomannomutase, alpha/beta/alpha domain II|PF02878:Phosphoglucomutase/phosphomannomutase, alpha/beta/alpha domain I|PF02880:Phosphoglucomu	PGM_PMM_II
HORVU.MOREX.r2.1HG0017340	0	6.04574	0	6.40372	- && - && -	-
HORVU.MOREX.r2.2HG0127220	0	3.78164	0	3.40506	- && Q9M077.1 RecName: Full=Serine/threonine-protein kinase Aurora-1; Short=AtAur1; AltName: Full=Aurora-like kinase 1 && PF00069:Protein kinase domain	Pkinase
HORVU.MOREX.r2.3HG0204350	69.7393	215.714	106.371	351.864	- && - && PF04832:SOUL heme-binding protein	-
HORVU.MOREX.r2.1HG0068040	1.14903	13.7318	1.61913	10.0351	- && - && -	-
HORVU.MOREX.r2.2HG0176690	7.02467	44.061	4.16584	35.8336	- && P69694.1 RecName: Full=Photosystem II reaction center protein K; Short=PSII-K; Flags: Precursor >P69693.1 RecName: Full=Photosystem II reaction center protein K; Short=PSII-K; Flags: Precursor && PF02533:Photosystem II 4 kDa reaction centre component	-
novel.405	0.792694	4.46233	0.498025	2.97268	- && A1E9H9.1 RecName: Full=Photosystem II reaction center protein M; Short=PSII-M && PF05151:Photosystem II reaction centre M protein (PsbM)	-
HORVU.MOREX.r2.2HG0153830	0	3.24487	0.0659901	4.25371	- && - && PF01657:Salt stress response/antifungal	-
HORVU.MOREX.r2.4HG0298030	0.0082091	2.44422	0.00975112	2.06386	- && Q0IQU1.2 RecName: Full=Laccase-22; AltName: Full=Benzenediol:oxygen oxidoreductase 22; AltName: Full=Diphenol oxidase 22; AltName: Full=Urishiol oxidase 22; Flags: Precursor && PF07732:Multicopper oxidase|PF00394:Multicopper oxidase|PF07731:Multicopp	-
HORVU.MOREX.r2.UnG0633510	4.38637	22.8778	2.49928	24.9941	- && Q9MTN7.2 RecName: Full=Photosystem I P700 chlorophyll a apoprotein A2; AltName: Full=PSI-B; AltName: Full=PsaB && PF00223:Photosystem I psaA/psaB protein	-
novel.627	0	2.17143	0	2.22637	- && - && -	-
HORVU.MOREX.r2.1HG0040700	0.515421	5.27617	0.43198	4.71846	- && - && -	-
novel.692	0	2.18008	0	2.05212	- && - && -	-
HORVU.MOREX.r2.5HG0422900	0.0475951	1.29298	0.111804	1.45836	- && P29250.2 RecName: Full=Linoleate 9S-lipoxygenase 2; AltName: Full=Lipoxygenase 2; AltName: Full=Lipoxygenase L-2 && PF01477:PLAT/LH2 domain|PF00305:Lipoxygenase	Lipoxygenase
HORVU.MOREX.r2.4HG0324960	2.20361	13.5327	2.20442	15.9358	- && P0CH35.1 RecName: Full=Ubiquitin-60S ribosomal protein L40-2; Contains: RecName: Full=Ubiquitin; Contains: RecName: Full=60S ribosomal protein L40-2; AltName: Full=CEP52; Flags: Precursor >P0CH34.1 RecName: Full=Ubiquitin-60S ribosomal protein L40-1;	ubiquitin
novel.1718	0.485912	3.36581	0.820787	3.17101	- && - && -	-
HORVU.MOREX.r2.5HG0351790	2.99281	21.4903	0.925973	19.24	- && Q6ENX9.1 RecName: Full=Photosystem II reaction center protein Z; Short=PSII-Z >P69695.1 RecName: Full=Photosystem II reaction center protein Z; Short=PSII-Z >P69696.1 RecName: Full=Photosystem II reaction center protein Z; Short=PSII-Z >Q6L3B0.1 RecN	-
novel.372	0	1.39142	0.0152131	1.88931	- && - && -	-
HORVU.MOREX.r2.3HG0235220	0.0256251	6.88163	0.0867348	6.87497	- && O98692.2 RecName: Full=NAD(P)H-quinone oxidoreductase subunit I, chloroplastic; AltName: Full=NAD(P)H dehydrogenase subunit I; Short=NDH subunit I; AltName: Full=NADH-plastoquinone oxidoreductase subunit I && PF13237:4Fe-4S dicluster domain	-
HORVU.MOREX.r2.3HG0259910	2.13863	18.6132	1.35845	14.5711	- && Q9XJ61.1 RecName: Full=MADS-box transcription factor 51; Short=OsMADS51; AltName: Full=OsMADS65 && -	-
novel.312	0.0283678	4.0284	0.0168483	4.67472	- && - && -	-
novel.1819	0.12381	2.07413	0.0488305	1.43034	- && A1E9K3.1 RecName: Full=Cytochrome f; Flags: Precursor && PF01333:Apocytochrome F, C-terminal	-
HORVU.MOREX.r2.UnG0635540	0.145914	3.40033	0.0995079	2.72955	- && A1EA00.1 RecName: Full=DNA-directed RNA polymerase subunit beta''; AltName: Full=PEP; AltName: Full=Plastid-encoded RNA polymerase subunit beta''; Short=RNA polymerase subunit beta'' && PF04998:RNA polymerase Rpb1, domain 5	-
HORVU.MOREX.r2.UnG0634140	1.0098	8.42566	1.01347	7.38165	- && A1EA02.1 RecName: Full=ATP synthase subunit a, chloroplastic; AltName: Full=ATP synthase F0 sector subunit a; AltName: Full=F-ATPase subunit IV && -	-
HORVU.MOREX.r2.1HG0006780	0.279773	6.17601	0	4.22263	- && - && PF03108:MuDR family transposase	MuDR
HORVU.MOREX.r2.UnG0633190	0.698379	8.39004	0.140078	7.05255	- && A1E9M6.1 RecName: Full=30S ribosomal protein S8, chloroplastic && PF00410:Ribosomal protein S8	-
HORVU.MOREX.r2.2HG0134850	0.445539	9.15083	0.126899	6.91512	- && P12339.2 RecName: Full=30S ribosomal protein S7, chloroplastic >Q6ENQ9.1 RecName: Full=30S ribosomal protein S7, chloroplastic >Q6L3C6.1 RecName: Full=30S ribosomal protein S7, chloroplastic >A1EA53.1 RecName: Full=30S ribosomal protein S7, chloropla	-
HORVU.MOREX.r2.2HG0128930	0.405349	10.152	1.07889	14.3622	- && - && -	-
novel.229	0	1.3711	0	1.27541	- && Q9ZV71.1 RecName: Full=Probable beta-1,3-galactosyltransferase 3 && PF01762:Galactosyltransferase	Galactosyl_T
novel.516	0	1.32807	0	1.22038	- && - && -	-
HORVU.MOREX.r2.UnG0630320	0.212407	5.84538	0.131073	3.59713	- && A1E9M8.1 RecName: Full=50S ribosomal protein L16, chloroplastic && PF00252:Ribosomal protein L16p/L10e	-
novel.1728	0.154857	3.05841	0.0584013	2.04887	- && - && -	-
HORVU.MOREX.r2.6HG0472730	0.0155276	4.16681	0.0493679	1.84785	- && - && PF03004:Plant transposase (Ptta/En/Spm family)	-
[truncated: 452 more rows]

## Sheet: OEvsWT_C_down
gene_id	WT_28C	OE_28C	WT_28D	OE_28D	gene_description	tf_family
[truncated: 898 more rows]

[truncated: 3 more sheets: OEvsWT_D_up, OEvsWT_D_down, ABA synthesis related genes]
