# Supplementary material for: WHIRLY1 Acts Upstream of ABA-Related Reprogramming of Drought-Induced Gene Expression in Barley and Affects Stress-Related Histone Modifications
Source: Int J Mol Sci. 2023 Mar 28;24(7):6326. doi: 10.3390/ijms24076326 (PMC10094662; doi:10.3390/ijms24076326)
Supplement: Supplementary file 1 [file ijms-24-06326-s001.zip › Supplemental table S4.xlsx]

## Sheet: Cis-element-containing DEGgene
Gene id (161)	Gene description	TF family	Cis element motif sequence	Promoter position
HORVU.MOREX.r2.5HG0381840	- && - && PF04970:Lecithin retinol acyltransferase	-	TGTCATTCTTTGGTAA	chr5H:303818434-303819934
HORVU.MOREX.r2.5HG0406490	- && Q9LPS9.1 RecName: Full=Pirin-like protein At1g50590 && PF02678:Pirin|PF05726:Pirin C-terminal cupin domain	-	TGACACCACAGTCA	chr5H:484074281-484075781
HORVU.MOREX.r2.2HG0162580	- && Q7XI14.1 RecName: Full=Probable D-2-hydroxyglutarate dehydrogenase, mitochondrial; Flags: Precursor && PF01565:FAD binding domain|PF02913:FAD linked oxidases, C-terminal domain	FAD_binding_4	TGACGGCCGTGTCA	chr2H:623873102-623874602
HORVU.MOREX.r2.5HG0356920	- && - && PF00595:PDZ domain (Also known as DHR or GLGF)|PF13365:Trypsin-like peptidase domain	PDZ	TGTCCGCCCCTGGTCT	chr5H:25270967-25272467
HORVU.MOREX.r2.5HG0407520	- && Q8GYX8.2 RecName: Full=Chaperone protein dnaJ 10; Short=AtDjC10; Short=AtJ10 && PF14308:X-domain of DnaJ-containing|PF00226:DnaJ domain	DnaJ	TCTCAATACATGGTCA	chr5H:489092770-489094270
HORVU.MOREX.r2.3HG0261930	- && Q84J88.1 RecName: Full=Heavy metal-associated isoprenylated plant protein 36; Short=AtHIP36; Flags: Precursor && PF00403:Heavy-metal-associated domain	HMA	TGTCGTAATATGGTCA	chr3H:591635941-591637441
HORVU.MOREX.r2.2HG0129010	- && Q9SY14.1 RecName: Full=CSC1-like protein At4g02900 && PF02714:Calcium-dependent channel, 7TM region, putative phosphate|PF13967:Late exocytosis, associated with Golgi transport|PF14703:Cytosolic domain of 10TM putative phosphate transporter	-	TAACAGCTGTGTCA	chr2H:385422377-385423877
HORVU.MOREX.r2.6HG0506450	- && Q501H5.1 RecName: Full=Phosphatidylinositol/phosphatidylcholine transfer protein SFH13; AltName: Full=Protein SEC FOURTEEN HOMOLOGS 13; Short=AtSFH13 && PF03765:CRAL/TRIO, N-terminal domain|PF00650:CRAL/TRIO domain	CRAL_TRIO_N	TGACAAGACTGACA	chr6H:491955787-491957287
HORVU.MOREX.r2.1HG0002830	- && - && -	-	TGTAATTAACTGGTCA	chr1H:6492326-6493826
HORVU.MOREX.r2.5HG0421620	- && - && PF13365:Trypsin-like peptidase domain	-	AGACACTAGTGTCA	chr5H:528730897-528732397
HORVU.MOREX.r2.4HG0294250	- && O22925.1 RecName: Full=Vacuolar-sorting receptor 2; Short=AtVSR2; AltName: Full=BP80-like protein c; Short=AtBP80c; AltName: Full=Epidermal growth factor receptor-like protein 4; Short=AtELP4; Flags: Precursor && PF02225:PA domain	-	AGACATCCATGTCA	chr4H:119160545-119162045
HORVU.MOREX.r2.5HG0439540	- && - && PF00646:F-box domain	F-box	TGTCGCTTCGTGGTCA	chr5H:578386266-578387766
HORVU.MOREX.r2.6HG0506960	- && Q9CAA7.1 RecName: Full=Putative U-box domain-containing protein 42; AltName: Full=Plant U-box protein 42 && PF04564:U-box domain	U-box	TGTCATACTCAGGTCA	chr6H:496534773-496536273
HORVU.MOREX.r2.3HG0186320	- && Q9LIN2.1 RecName: Full=GDSL esterase/lipase At3g26430; AltName: Full=Extracellular lipase At3g26430; Flags: Precursor && PF00657:GDSL-like Lipase/Acylhydrolase	Lipase_GDSL	TGACGGGACTGTCA	chr3H:12312989-12314489
HORVU.MOREX.r2.5HG0441050	- && Q9MA55.1 RecName: Full=Acyl-CoA-binding domain-containing protein 4; Short=Acyl-CoA binding protein 4 && PF13415:Galactose oxidase, central domain|PF01344:Kelch motif|PF00887:Acyl CoA binding protein	Kelch_1	TGACATGCATGTCA	chr5H:582519288-582520788
HORVU.MOREX.r2.1HG0063760	- && Q8RXD4.1 RecName: Full=Protein BREAST CANCER SUSCEPTIBILITY 1 homolog; Short=AtBRCA1 && PF13920:Zinc finger, C3HC4 type (RING finger)|PF00533:BRCA1 C Terminus (BRCT) domain|PF13771:PHD-like zinc-binding domain	BRCT	TGTTATGTTTTGGTCA	chr1H:485515535-485517035
HORVU.MOREX.r2.2HG0168190	- && P13564.2 RecName: Full=Glutamine synthetase leaf isozyme, chloroplastic; AltName: Full=GS2; AltName: Full=Glutamate--ammonia ligase; Flags: Precursor && PF00120:Glutamine synthetase, catalytic domain|PF03951:Glutamine synthetase, beta-Grasp domain	-	TGTCATAGCTTGGTCC	chr2H:638747150-638748650
HORVU.MOREX.r2.2HG0156320	- && Q93XP7.1 RecName: Full=Cis-zeatin O-glucosyltransferase 1; Short=cisZOG1 && PF00201:UDP-glucoronosyl and UDP-glucosyl transferase	UDPGT	TGTCATACCACGGTCA	chr2H:602323576-602325076
HORVU.MOREX.r2.3HG0192320	- && Q9S7I6.1 RecName: Full=LRR receptor-like serine/threonine-protein kinase RPK2; AltName: Full=Protein TOADSTOOL 2; AltName: Full=Receptor-like protein kinase 2; Flags: Precursor && PF08263:Leucine rich repeat N-terminal domain|PF00069:Protein kinase d	Pkinase	TGTAAAACCATGGTCA	chr3H:27229739-27231239
HORVU.MOREX.r2.2HG0147250	- && Q7Y1Z0.1 RecName: Full=Chitinase 5; AltName: Full=Class IV chitinase a; Short=OsChia4a; AltName: Full=Pathogenesis related (PR)-3 chitinase 5; Flags: Precursor && PF00182:Chitinase class I|PF00187:Chitin recognition protein	-	TGTCAAAGATTGGTAA	chr2H:551452788-551454288
HORVU.MOREX.r2.5HG0387970	- && - && -	-	AGTCATGTTTTGGTCA	chr5H:359005006-359006506
HORVU.MOREX.r2.1HG0072210	- && Q8S985.1 RecName: Full=Auxin response factor 15; AltName: Full=ETTIN-like protein 1; AltName: Full=OsETTIN1 && PF06507:Auxin response factor|PF02362:B3 DNA binding domain	Auxin_resp	TGACATGCATGACA	chr1H:505326542-505328042
HORVU.MOREX.r2.2HG0148770	- && Q9SD53.1 RecName: Full=UPF0481 protein At3g47200 && PF03140:Plant protein of unknown function	-	TGTCAAGAGCTTGTCA	chr2H:561332762-561334262
HORVU.MOREX.r2.1HG0039310	- && Q9SGU9.1 RecName: Full=Methionine gamma-lyase; Short=AtMGL; AltName: Full=L-methioninase && PF01053:Cys/Met metabolism PLP-dependent enzyme	Cys_Met_Meta_PP	TGACAGGGCTAGGTCA	chr1H:336620553-336622053
HORVU.MOREX.r2.3HG0270060	- && - && -	-	TGTCAATGGAAGGTCA	chr3H:613320659-613322159
HORVU.MOREX.r2.3HG0195630	- && O80939.1 RecName: Full=L-type lectin-domain containing receptor kinase IV.1; Short=Arabidopsis thaliana lectin-receptor kinase e; Short=AthlecRK-e; Short=LecRK-IV.1; AltName: Full=Lectin Receptor Kinase 1; Flags: Precursor && PF00139:Legume lectin do	Pkinase	TGTCACATACTGCTCA	chr3H:40025938-40027438
HORVU.MOREX.r2.7HG0620030	- && A8QW51.1 RecName: Full=Probable O-methyltransferase 2; Short=SbOMT2 && PF00891:O-methyltransferase|PF08100:Dimerisation domain	-	TGACAAAGCAGTCA	chr7H:624804393-624805893
HORVU.MOREX.r2.6HG0509510	- && Q6MEW4.1 RecName: Full=2,3-bisphosphoglycerate-dependent phosphoglycerate mutase; Short=BPG-dependent PGAM; Short=PGAM; Short=Phosphoglyceromutase; Short=dPGM && PF00300:Histidine phosphatase superfamily (branch 1)	-	TGTCATAATGTAGTCA	chr6H:511286982-511288482
HORVU.MOREX.r2.1HG0041900	- && - && PF03127:GAT domain|PF00790:VHS domain	-	TGTCATCAGGTGATCA	chr1H:358094348-358095848
HORVU.MOREX.r2.4HG0302250	- && - && PF13418:Galactose oxidase, central domain	-	TGACATGTGTGACA	chr4H:213849840-213851340
HORVU.MOREX.r2.4HG0297270	- && P17801.2 RecName: Full=Putative receptor protein kinase ZmPK1; Flags: Precursor && PF00069:Protein kinase domain|PF00954:S-locus glycoprotein domain|PF01453:D-mannose binding lectin	Pkinase	TGTCAGACTATCGTCA	chr4H:149504437-149505937
HORVU.MOREX.r2.3HG0186540	- && Q9XEA0.1 RecName: Full=Leucine--tRNA ligase, chloroplastic/mitochondrial; AltName: Full=Leucyl-tRNA synthetase; Short=LeuRS; AltName: Full=Protein EMBRYO DEFECTIVE 2369; Flags: Precursor && PF13603:Leucyl-tRNA synthetase, Domain 2|PF08264:Anticodon-b	-	TTTCAACTTTTGGTCA	chr3H:12473458-12474958
HORVU.MOREX.r2.5HG0402270	- && Q0J1C1.1 RecName: Full=1-aminocyclopropane-1-carboxylate oxidase 1; Short=ACC oxidase 1; AltName: Full=Ethylene-forming enzyme; Short=EFE && PF03171:2OG-Fe(II) oxygenase superfamily|PF14226:non-haem dioxygenase in morphine synthesis N-terminal	2OG-FeII_Oxy	TGTCATCAGGCGGTCA	chr5H:463493298-463494798
HORVU.MOREX.r2.7HG0555100	- && - && -	-	TGACACTGGGGTCA	chr7H:104994513-104996013
HORVU.MOREX.r2.5HG0440080	- && O23755.1 RecName: Full=Elongation factor 2; Short=EF-2 && PF03764:Elongation factor G, domain IV|PF00009:Elongation factor Tu GTP binding domain|PF03144:Elongation factor Tu domain 2|PF14492:Elongation Factor G, domain II|PF00679:Elongation factor G	GTP_EFTU	GGTCACTTAATGGTCA	chr5H:579810446-579811946
HORVU.MOREX.r2.1HG0067180	- && - && PF04520:Senescence regulator	-	TGTCAGAAAATGGTCA	chr1H:494580516-494582016
HORVU.MOREX.r2.1HG0011160	- && P81898.2 RecName: Full=Peptide-N4-(N-acetyl-beta-glucosaminyl)asparagine amidase A; Short=PNGase A; AltName: Full=Glycopeptide N-glycosidase; AltName: Full=N-glycanase; Contains: RecName: Full=Peptide-N4-(N-acetyl-beta-glucosaminyl)asparagine amidase	-	TGTCACCGAATGGTCA	chr1H:35162703-35164203
HORVU.MOREX.r2.7HG0619320	- && Q9LNJ3.1 RecName: Full=Aspartyl protease family protein 2; Flags: Precursor && PF14543:Xylanase inhibitor N-terminal|PF14541:Xylanase inhibitor C-terminal	-	GGTCAGTCCGAGGTCA	chr7H:623243417-623244917
HORVU.MOREX.r2.5HG0383720	- && Q0D3J9.1 RecName: Full=Zinc finger CCCH domain-containing protein 53; Short=OsC3H53 && PF16131:Torus domain	-	TGACAGCAGTGACA	chr5H:320577835-320579335
HORVU.MOREX.r2.3HG0208840	- && Q9LSM9.2 RecName: Full=Serine carboxypeptidase-like 33; Flags: Precursor && PF00450:Serine carboxypeptidase	Peptidase_S10	TGTCAGCGTTTAGTCA	chr3H:158914561-158916061
HORVU.MOREX.r2.7HG0566120	- && Q9S7H4.1 RecName: Full=Chorismate mutase 2; Short=AtCM2; AltName: Full=CM-2 && -	-	TGACATGCATGACA	chr7H:189452351-189453851
HORVU.MOREX.r2.5HG0391810	- && Q9LXT4.1 RecName: Full=Plant cysteine oxidase 5 && PF07847:Protein of unknown function (DUF1637)	-	TTTCACAAATTGGTCA	chr5H:393056628-393058128
HORVU.MOREX.r2.7HG0614180	- && Q67W82.1 RecName: Full=Probable 4-coumarate--CoA ligase 4; Short=4CL 4; Short=Os4CL4; AltName: Full=4-coumaroyl-CoA synthase 4 && PF00501:AMP-binding enzyme|PF13193:AMP-binding enzyme C-terminal domain	AMP-binding	TGACATGGCGGTCA	chr7H:610771568-610773068
HORVU.MOREX.r2.2HG0161460	- && P43309.1 RecName: Full=Polyphenol oxidase, chloroplastic; Short=PPO; AltName: Full=Catechol oxidase; Flags: Precursor && PF12143:Protein of unknown function (DUF_B2219)|PF12142:Polyphenol oxidase middle domain|PF00264:Common central domain of tyrosin	-	TTTCAACTGTTGGTCA	chr2H:619669254-619670754
HORVU.MOREX.r2.2HG0093860	- && Q9ZQ85.2 RecName: Full=Myb family transcription factor EFM; AltName: Full=Protein EARLY FLOWERING MYB && PF00249:Myb-like DNA-binding domain	Myb_DNA-binding	TCTCATAGGCTGGTCA	chr2H:44395563-44397063
HORVU.MOREX.r2.7HG0604890	- && Q8RXT9.2 RecName: Full=GDSL esterase/lipase At1g28590; AltName: Full=Extracellular lipase At1g28590; Flags: Precursor && PF00657:GDSL-like Lipase/Acylhydrolase	Lipase_GDSL	TGACATCCTTGTCA	chr7H:578554568-578556068
HORVU.MOREX.r2.2HG0079820	- && Q9FYA2.1 RecName: Full=Probable WRKY transcription factor 75; AltName: Full=WRKY DNA-binding protein 75 && PF03106:WRKY DNA -binding domain	WRKY	AGACACACATGTCA	chr2H:2654563-2656063
HORVU.MOREX.r2.6HG0505150	- && Q9ASU1.1 RecName: Full=Diacylglycerol O-acyltransferase 2 && PF03982:Diacylglycerol acyltransferase	-	TGTAAGCCCGTGGGCA	chr6H:482094053-482095553
HORVU.MOREX.r2.7HG0592010	- && P17801.2 RecName: Full=Putative receptor protein kinase ZmPK1; Flags: Precursor && PF01453:D-mannose binding lectin|PF00069:Protein kinase domain|PF00954:S-locus glycoprotein domain	Pkinase	TGTTAGGTTCTGGTCA	chr7H:491272328-491273828
HORVU.MOREX.r2.1HG0008380	- && Q6NQJ6.1 RecName: Full=Ribonuclease II, chloroplastic/mitochondrial; Short=AtmtRNaseII; Short=RNase II; AltName: Full=Protein EMBRYO DEFECTIVE 2730; AltName: Full=Ribonucleotide reductase 1; Flags: Precursor && PF00773:RNB domain	RNB	TGACACGCTTGTAA	chr1H:24163739-24165239
HORVU.MOREX.r2.4HG0337930	- && Q10QS9.1 RecName: Full=B3 domain-containing protein Os03g0184500 && PF02362:B3 DNA binding domain	B3	TGTCATTATCAGGTCA	chr4H:586302687-586304187
HORVU.MOREX.r2.5HG0381850	- && - && PF03435:Saccharopine dehydrogenase NADP binding domain	Saccharop_dh	TGACACATGAGTCA	chr5H:303826434-303827934
HORVU.MOREX.r2.7HG0598660	- && Q6ZCR3.1 RecName: Full=Germin-like protein 8-12; Flags: Precursor && PF00190:Cupin	-	TGGCACATAGTGGTCA	chr7H:543108678-543110178
HORVU.MOREX.r2.7HG0539650	- && - && PF09353:Domain of unknown function (DUF1995)	-	TGACAGCTGTGACA	chr7H:28098287-28099787
HORVU.MOREX.r2.7HG0593040	- && - && -	-	TGTCACCGATTGGACA	chr7H:499849911-499851411
HORVU.MOREX.r2.4HG0277800	- && Q9SGU2.1 RecName: Full=Auxin-responsive protein SAUR71; AltName: Full=Protein SMALL AUXIN UP RNA 71 && PF02519:Auxin responsive protein	Auxin_inducible	TGCCAGGGCGTGGTCC	chr4H:5698360-5699860
HORVU.MOREX.r2.3HG0241800	- && Q9FL87.1 RecName: Full=Protein CHLORORESPIRATORY REDUCTION 7, chloroplastic; Flags: Precursor && PF12095:Protein of unknown function (DUF3571)	-	TGTCAATTCTTGGTAA	chr3H:504987717-504989217
HORVU.MOREX.r2.7HG0587680	- && - && PF00139:Legume lectin domain	-	AGACATACGTGTCA	chr7H:452027988-452029488
HORVU.MOREX.r2.1HG0057060	- && Q9LVM0.1 RecName: Full=Probable inactive receptor kinase At5g58300; Flags: Precursor && PF07714:Protein tyrosine kinase|PF08263:Leucine rich repeat N-terminal domain	Pkinase_Tyr	AGACAAGGGTGTCA	chr1H:456428545-456430045
HORVU.MOREX.r2.2HG0085290	- && Q9LVV5.2 RecName: Full=Thylakoid lumenal 15.0 kDa protein 2, chloroplastic; Flags: Precursor && -	-	TGTCAATCACTCGTCA	chr2H:15571931-15573431
HORVU.MOREX.r2.1HG0005640	- && Q8BL95.1 RecName: Full=UPF0769 protein C21orf59 homolog && PF11069:Protein of unknown function (DUF2870)	-	TGAAAACCGTGTCA	chr1H:14003076-14004576
HORVU.MOREX.r2.4HG0321810	- && - && PF13398:Peptidase M50B-like	-	TGTAACCGTTTGGTCA	chr4H:476657189-476658689
HORVU.MOREX.r2.5HG0422470	- && - && -	-	TGACATGCATGACA	chr5H:531256255-531257755
HORVU.MOREX.r2.4HG0342850	- && Q9FNL7.1 RecName: Full=Protein NRT1/ PTR FAMILY 5.2; Short=AtNPF5.2; AltName: Full=Peptide transporter PTR3-A; Short=AtPTR3 && PF00854:POT family	-	TGTCATCACTTTGTCA	chr4H:605656458-605657958
HORVU.MOREX.r2.2HG0131320	- && O23342.1 RecName: Full=Preprotein translocase subunit SECE1; Flags: Precursor && -	-	TGTCACCATCTGATCA	chr2H:412118029-412119529
HORVU.MOREX.r2.6HG0471860	- && P0DKJ4.1 RecName: Full=Bidirectional sugar transporter SWEET2a; Short=SbSWEET2a && PF03083:Sugar efflux transporter for intercellular exchange	-	TGCCATTTTTTGGTCA	chr6H:119105935-119107435
HORVU.MOREX.r2.6HG0457770	- && O64477.1 RecName: Full=G-type lectin S-receptor-like serine/threonine-protein kinase At2g19130; Flags: Precursor && PF01453:D-mannose binding lectin|PF08276:PAN-like domain|PF00954:S-locus glycoprotein domain|PF00069:Protein kinase domain	Pkinase	TGTCACTGATTGGTCA	chr6H:28008977-28010477
HORVU.MOREX.r2.7HG0618470	- && Q94FM7.2 RecName: Full=5-epiaristolochene 1,3-dihydroxylase; Short=NtEAH; AltName: Full=Cytochrome P450 71D20 && PF00067:Cytochrome P450	p450	TGACATGCAGTGGTCA	chr7H:621369754-621371254
HORVU.MOREX.r2.2HG0157070	- && O81304.1 RecName: Full=Probable plastid-lipid-associated protein 11; AltName: Full=Fibrillin-9 && PF04755:PAP_fibrillin	-	TGTCTCGCGCGGGTCA	chr2H:604802472-604803972
HORVU.MOREX.r2.6HG0516710	- && P12949.1 RecName: Full=Dehydrin DHN4; AltName: Full=B18 && PF00257:Dehydrin	-	TGTCAGACCATGGTGA	chr6H:545274446-545275946
HORVU.MOREX.r2.2HG0127670	- && Q7H6J0.1 RecName: Full=DNA-directed RNA polymerase subunit alpha; Short=PEP; AltName: Full=Plastid-encoded RNA polymerase subunit alpha; Short=RNA polymerase subunit alpha >Q7H6J1.1 RecName: Full=DNA-directed RNA polymerase subunit alpha; Short=PEP;	RNA_pol_A_bac	TGTTAGGGTTTGGTCA	chr2H:376056420-376057920
HORVU.MOREX.r2.5HG0427610	- && Q9FKL6.1 RecName: Full=Calmodulin-binding protein 60 B && PF07887:Calmodulin binding protein-like	-	TGACAAGTGAGTCA	chr5H:547335156-547336656
HORVU.MOREX.r2.2HG0092740	- && - && PF00578:AhpC/TSA family	-	GGTCAACGTCTGGTCA	chr2H:40235555-40237055
HORVU.MOREX.r2.7HG0588750	- && P38456.1 RecName: Full=Uncharacterized mitochondrial protein ymf11; AltName: Full=ORF7323 && -	-	TGACATGCATGACA	chr7H:461471664-461473164
HORVU.MOREX.r2.3HG0274190	- && Q3AHX9.1 RecName: Full=Probable dual-specificity RNA methyltransferase RlmN; AltName: Full=23S rRNA (adenine(2503)-C(2))-methyltransferase; AltName: Full=23S rRNA m2A2503 methyltransferase; AltName: Full=Ribosomal RNA large subunit methyltransferase	Radical_SAM	TTTCAAAGTTTGGTCA	chr3H:624057193-624058693
HORVU.MOREX.r2.2HG0108480	- && P10708.1 RecName: Full=Chlorophyll a-b binding protein 7, chloroplastic; AltName: Full=LHCI type II CAB-7; Flags: Precursor && PF00504:Chlorophyll A-B binding protein	-	TGACATGCATGACA	chr2H:143015807-143017307
HORVU.MOREX.r2.5HG0420460	- && Q653B6.1 RecName: Full=Potassium transporter 18; AltName: Full=OsHAK18 && PF02705:K+ potassium transporter	K_trans	GGACACGGTTGTCA	chr5H:526227134-526228634
HORVU.MOREX.r2.3HG0253820	- && - && -	-	TTTCATAAATTGGTCA	chr3H:563062284-563063784
HORVU.MOREX.r2.3HG0270520	- && Q02438.2 RecName: Full=Glucan endo-1,3-beta-glucosidase GV; AltName: Full=(1->3)-beta-glucan endohydrolase GV; AltName: Full=(1->3)-beta-glucanase isoenzyme GV; AltName: Full=Beta-1,3-endoglucanase GV && PF00332:Glycosyl hydrolases family 17	Glyco_hydro_17	CGTCAGGGCCCGGTCA	chr3H:614119752-614121252
HORVU.MOREX.r2.2HG0172600	- && O81905.1 RecName: Full=Receptor-like serine/threonine-protein kinase SD1-8; AltName: Full=Arabidopsis thaliana receptor kinase 3; AltName: Full=S-domain-1 (SD1) receptor kinase 8; Short=SD1-8; Flags: Precursor && PF01453:D-mannose binding lectin|PF00	Pkinase	AGACAGGCGTGTCA	chr2H:651813420-651814920
HORVU.MOREX.r2.7HG0621840	- && B5X570.1 RecName: Full=NAC domain-containing protein 14; Short=ANAC014; AltName: Full=Protein NTM1-like 2 && PF02365:No apical meristem (NAM) protein	NAM	TGACATGCAAGTCA	chr7H:628763326-628764826
HORVU.MOREX.r2.5HG0365020	- && Q9SZL8.1 RecName: Full=Protein FAR1-RELATED SEQUENCE 5 && PF10551:MULE transposase domain|PF03101:FAR1 DNA-binding domain|PF04434:SWIM zinc finger	FAR1	TGTCAGGGGATGGTCA	chr5H:84809089-84810589
HORVU.MOREX.r2.4HG0343390	- && Q6PHS9.1 RecName: Full=Voltage-dependent calcium channel subunit alpha-2/delta-2; AltName: Full=Protein ducky; AltName: Full=Voltage-gated calcium channel subunit alpha-2/delta-2; Contains: RecName: Full=Voltage-dependent calcium channel subunit alph	VWA	TGTGATTGGATGGTCA	chr4H:607462171-607463671
HORVU.MOREX.r2.2HG0116980	- && Q6Z4A7.1 RecName: Full=Probable 5'-adenylylsulfate reductase 1, chloroplastic; AltName: Full=Adenosine 5'-phosphosulfate 5'-adenylylsulfate sulfotransferase 1; Short=APS sulfotransferase 1; AltName: Full=Adenosine 5'-phosphosulfate reductase-like 1;	-	TGACATGCATGACA	chr2H:225668657-225670157
HORVU.MOREX.r2.7HG0549360	- && Q5G1S8.2 RecName: Full=Pentatricopeptide repeat-containing protein At3g18110, chloroplastic; AltName: Full=Protein EMBRYO DEFECTIVE 1270; Flags: Precursor && PF12854:PPR repeat|PF13041:PPR repeat family	-	TTTCAGTCCTTGGTCA	chr7H:66024601-66026101
HORVU.MOREX.r2.5HG0351690	- && P41096.1 RecName: Full=50S ribosomal protein L2, chloroplastic >A1EA50.1 RecName: Full=50S ribosomal protein L2, chloroplastic >A8Y9C8.1 RecName: Full=50S ribosomal protein L2, chloroplastic && PF03947:Ribosomal Proteins L2, C-terminal domain|PF00203	Ribosomal_L2_C	TGTCTAGAGATGGTCA	chr5H:6731589-6733089
HORVU.MOREX.r2.3HG0274640	- && Q9LUC5.1 RecName: Full=Cytochrome P450 72A15 && PF00067:Cytochrome P450	p450	TGACAGCACTGTAA	chr3H:625185241-625186741
HORVU.MOREX.r2.5HG0392060	- && Q9M6E8.1 RecName: Full=9-cis-epoxycarotenoid dioxygenase NCED1, chloroplastic; AltName: Full=PvNCED1; Flags: Precursor && PF03055:Retinal pigment epithelial membrane protein	RPE65	TGTCAGCCACAGGTCA	chr5H:394982283-394983783
HORVU.MOREX.r2.2HG0104420	- && Q59324.1 RecName: Full=2-hydroxy-6-oxo-6-phenylhexa-2,4-dienoate hydrolase; Short=HOPDA hydrolase; AltName: Full=2,6-dioxo-6-phenylhexa-3-enoate hydrolase && PF12695:Alpha/beta hydrolase family	-	TGACACGCATGTCA	chr2H:107032516-107034016
HORVU.MOREX.r2.6HG0523770	- && - && PF08263:Leucine rich repeat N-terminal domain|PF13855:Leucine rich repeat	LRRNT_2	TGACACCAGTTGGTCA	chr6H:566888684-566890184
HORVU.MOREX.r2.4HG0344860	- && Q0WQX7.1 RecName: Full=RHOMBOID-like protein 1; Short=AtRBL1 && PF01694:Rhomboid family	Rhomboid	TGACACGACTATCA	chr4H:612173758-612175258
HORVU.MOREX.r2.5HG0409600	- && P14133.1 RecName: Full=L-ascorbate oxidase; Short=ASO; Short=Ascorbase; Flags: Precursor && PF00394:Multicopper oxidase|PF07731:Multicopper oxidase|PF07732:Multicopper oxidase	-	TGACATGCATGACA	chr5H:496447465-496448965
HORVU.MOREX.r2.4HG0283500	- && Q9SW80.3 RecName: Full=BEL1-like homeodomain protein 2; Short=BEL1-like protein 2; AltName: Full=Protein SAWTOOTH 1 && PF07526:Associated with HOX|PF05920:Homeobox KN domain	POX	TTTCAAGTGCTGGTCA	chr4H:28786505-28788005
HORVU.MOREX.r2.3HG0267570	- && A1E9N6.1 RecName: Full=30S ribosomal protein S15, chloroplastic && PF00312:Ribosomal protein S15	-	TGTCAGCATATGCTCA	chr3H:606016475-606017975
HORVU.MOREX.r2.6HG0471350	- && Q9S9N9.1 RecName: Full=Cinnamoyl-CoA reductase 1; Short=AtCCR1; AltName: Full=Protein IRREGULAR XYLEM 4 && PF01370:NAD dependent epimerase/dehydratase family	Epimerase	TGACAGTGGTGACA	chr6H:115899334-115900834
HORVU.MOREX.r2.1HG0019930	- && - && -	-	TGACAGAGATGACA	chr1H:99258050-99259550
HORVU.MOREX.r2.2HG0178910	- && Q7XSV4.1 RecName: Full=Tubby-like F-box protein 7; Short=OsTLP7; AltName: Full=Tubby-like F-box protein 3; Short=OsTLP3 && PF00646:F-box domain|PF01167:Tub family	Tub	TGTCAGTTACTCGTCA	chr2H:668145467-668146967
HORVU.MOREX.r2.1HG0032360	- && - && PF13855:Leucine rich repeat	-	TGACAAGTCAGTCA	chr1H:264308613-264310113
HORVU.MOREX.r2.4HG0339540	- && B9DFU2.1 RecName: Full=Cytochrome P450 711A1; AltName: Full=Protein MORE AXILLARY BRANCHES 1 && PF00067:Cytochrome P450	p450	AGACATGCATGTCA	chr4H:593988948-593990448
HORVU.MOREX.r2.5HG0423960	- && Q9C503.1 RecName: Full=Protein NDH-DEPENDENT CYCLIC ELECTRON FLOW 5; Flags: Precursor && -	-	AGTCAATGAGTGGTCA	chr5H:535761238-535762738
HORVU.MOREX.r2.6HG0525000	- && - && PF00501:AMP-binding enzyme	AMP-binding	TGACATGTGTGACA	chr6H:569009493-569010993
HORVU.MOREX.r2.2HG0171960	- && Q6Z4T5.1 RecName: Full=DNA polymerase I A, chloroplastic; AltName: Full=DNA polymerase PolI-like A; Short=OsPolI-like A; AltName: Full=DNA polymerase gamma 1; Flags: Precursor && PF01612:3'-5' exonuclease|PF00476:DNA polymerase family A	3_5_exonuc	TGACAGCCATGGCA	chr2H:650308251-650309751
HORVU.MOREX.r2.4HG0321020	- && A2XFC1.2 RecName: Full=DNA topoisomerase 6 subunit A3; Short=OsTOP6A3; AltName: Full=DNA topoisomerase 6 subunit A; Short=OsTOP6A; AltName: Full=Meiotic recombination protein SPO11-3 >Q0DSV9.2 RecName: Full=Topoisomerase 6 subunit A3; Short=OsTOP6A3;	-	TGCCAGCCCGTGGTCT	chr4H:470008386-470009886
HORVU.MOREX.r2.6HG0508760	- && Q9LX07.1 RecName: Full=Annexin D7; AltName: Full=AnnAt7 && PF00191:Annexin	-	AGACAGGCCTGTCA	chr6H:506431430-506432930
HORVU.MOREX.r2.3HG0256690	- && Q39134.2 RecName: Full=Amino acid permease 3; AltName: Full=Amino acid transporter AAP3 && PF01490:Transmembrane amino acid transporter protein	Aa_trans	TATCATTCACTGGTCA	chr3H:572702186-572703686
HORVU.MOREX.r2.6HG0516480	- && - && PF13474:SnoaL-like domain	-	TGTCATGGGATGGTCA	chr6H:544409714-544411214
HORVU.MOREX.r2.5HG0412540	- && Q55720.1 RecName: Full=Ycf49-like protein && PF10693:Protein of unknown function (DUF2499)	-	TGTCATGCTATGGTCC	chr5H:503092841-503094341
HORVU.MOREX.r2.1HG0073220	- && A5GI62.1 RecName: Full=Ribosome maturation factor RimM && PF01782:RimM N-terminal domain	RimM	TTTCAAAAATTGGTCA	chr1H:507450886-507452386
HORVU.MOREX.r2.6HG0460140	- && - && -	-	TTTCAGAAACTGGTCA	chr6H:36975729-36977229
HORVU.MOREX.r2.6HG0460850	- && O81970.1 RecName: Full=Cytochrome P450 71A9; AltName: Full=Cytochrome P450 CP1 && PF00067:Cytochrome P450	p450	TGTCTTTTGTTGGTCA	chr6H:40823812-40825312
HORVU.MOREX.r2.3HG0193480	- && O22255.1 RecName: Full=RING-H2 finger protein ATL64; AltName: Full=RING-type E3 ubiquitin transferase ATL64 && PF13639:Ring finger domain	-	TGACATGCATGACA	chr3H:30711925-30713425
HORVU.MOREX.r2.7HG0619040	- && - && PF02620:Uncharacterized ACR, COG1399	-	TGACATCGGTGTCG	chr7H:622750010-622751510
HORVU.MOREX.r2.5HG0425730	- && O65351.1 RecName: Full=Subtilisin-like protease SBT1.7; AltName: Full=Cucumisin-like serine protease; AltName: Full=Subtilase subfamily 1 member 7; Short=AtSBT1.7; AltName: Full=Subtilisin-like serine protease 1; Short=At-SLP1; Flags: Precursor && PF	Peptidase_S8	TGACATGCATGACA	chr5H:540763467-540764967
HORVU.MOREX.r2.2HG0163870	- && Q4QTJ2.1 RecName: Full=S-norcoclaurine synthase 1; Short=PsNCS1; Flags: Precursor && PF00407:Pathogenesis-related protein Bet v I family	-	TGACATGCATGACA	chr2H:627848574-627850074
HORVU.MOREX.r2.5HG0408920	- && - && PF13920:Zinc finger, C3HC4 type (RING finger)	-	AGACAGGCGTGTCA	chr5H:493655836-493657336
HORVU.MOREX.r2.6HG0464420	- && Q9FWX7.1 RecName: Full=ABC transporter B family member 11; Short=ABC transporter ABCB.11; Short=AtABCB11; AltName: Full=Multidrug resistance protein 8; AltName: Full=P-glycoprotein 11 && PF07673:Protein of unknown function (DUF1602)|PF00664:ABC trans	ABC_membrane	AGTCACTAGCTGGTCA	chr6H:62426468-62427968
HORVU.MOREX.r2.5HG0398760	- && - && -	-	TTTCAGCTCATGGTCA	chr5H:441563015-441564515
HORVU.MOREX.r2.2HG0079040	- && Q7G764.1 RecName: Full=Probable NAD(P)H-dependent oxidoreductase 1 && PF00248:Aldo/keto reductase family	Aldo_ket_red	TGTCAGTTCTTGCTCA	chr2H:761115-762615
HORVU.MOREX.r2.7HG0598650	- && Q6ZCR3.1 RecName: Full=Germin-like protein 8-12; Flags: Precursor && PF00190:Cupin	-	TGGCACATCGTGGTCA	chr7H:542931957-542933457
HORVU.MOREX.r2.4HG0322360	- && Q9SYM5.1 RecName: Full=Trifunctional UDP-glucose 4,6-dehydratase/UDP-4-keto-6-deoxy-D-glucose 3,5-epimerase/UDP-4-keto-L-rhamnose-reductase RHM1; AltName: Full=Protein REPRESSOR OF LRX1 1; AltName: Full=Rhamnose biosynthetic enzyme 1; Short=AtRHM1; I	-	TGACACCAAAGTCA	chr4H:480896339-480897839
HORVU.MOREX.r2.6HG0502610	- && P26302.1 RecName: Full=Phosphoribulokinase, chloroplastic; Short=PRK; Short=PRKase; AltName: Full=Phosphopentokinase; Flags: Precursor && PF00485:Phosphoribulokinase / Uridine kinase family	-	TGTCAGCGTGTGGCCA	chr6H:464372375-464373875
HORVU.MOREX.r2.2HG0116600	- && Q69RC4.1 RecName: Full=Autophagy-related protein 8A; AltName: Full=Autophagy-related ubiquitin-like modifier ATG8A; Flags: Precursor >Q2XPP5.1 RecName: Full=Autophagy-related protein 8A; AltName: Full=Autophagy-related ubiquitin-like modifier ATG8A;	-	TGACATGCATGACA	chr2H:221623631-221625131
HORVU.MOREX.r2.4HG0318780	- && Q895K2.1 RecName: Full=DNA polymerase III PolC-type; Short=PolIII && PF00929:Exonuclease	Exonuc_X-T	TGTCACGAGCTGGTCT	chr4H:448045791-448047291
HORVU.MOREX.r2.1HG0076970	- && - && -	-	TTTCATAAATTGGTCA	chr1H:517374377-517375877
HORVU.MOREX.r2.6HG0466080	- && - && PF13855:Leucine rich repeat|PF08263:Leucine rich repeat N-terminal domain	LRRNT_2	TGGCAACATTTGGTCA	chr6H:74883535-74885035
HORVU.MOREX.r2.6HG0522340	- && Q9FG13.1 RecName: Full=Probable carboxylesterase 15; AltName: Full=AtCXE15 && PF07859:alpha/beta hydrolase fold	Abhydrolase_3	TGACGGCCATGTCA	chr6H:563666226-563667726
HORVU.MOREX.r2.6HG0517380	- && Q8L831.1 RecName: Full=Nudix hydrolase 3; Short=AtNUDT3 && PF00293:NUDIX domain|PF03571:Peptidase family M49	NUDIX	TGTGACATAATGGTCA	chr6H:547437675-547439175
HORVU.MOREX.r2.5HG0364780	- && - && PF08246:Cathepsin propeptide inhibitor domain (I29)	-	TGACACCGTTGACA	chr5H:82430481-82431981
HORVU.MOREX.r2.3HG0244870	- && Q8GUL1.1 RecName: Full=Autophagy-related protein 18g; Short=AtATG18g && PF12490:Breast carcinoma amplified sequence 3	-	TGACAGACCTGGCA	chr3H:520023017-520024517
HORVU.MOREX.r2.3HG0234750	- && F4IHJ0.1 RecName: Full=Phosphatidylinositol/phosphatidylcholine transfer protein SFH8; AltName: Full=Protein SEC FOURTEEN HOMOLOGS 8; Short=AtSFH8 && PF03765:CRAL/TRIO, N-terminal domain|PF00650:CRAL/TRIO domain	CRAL_TRIO_N	AGACAAGACTGTCA	chr3H:457026445-457027945
HORVU.MOREX.r2.3HG0235440	- && Q9SD62.1 RecName: Full=Putative receptor-like protein kinase At3g47110; Flags: Precursor && PF13855:Leucine rich repeat|PF00069:Protein kinase domain	Pkinase	TGTCAAAGCTTGGTAA	chr3H:462134111-462135611
HORVU.MOREX.r2.4HG0328580	- && Q42831.1 RecName: Full=Non-symbiotic hemoglobin; AltName: Full=HORvu GLB1; AltName: Full=Non-legume hemoglobin && PF00042:Globin	-	TGACACCGTTGTCG	chr4H:535589631-535591131
HORVU.MOREX.r2.2HG0181070	- && C0LGP4.1 RecName: Full=Probable LRR receptor-like serine/threonine-protein kinase At3g47570; Flags: Precursor && PF13855:Leucine rich repeat|PF07714:Protein tyrosine kinase	Pkinase_Tyr	TTTCAATATCTGGTCA	chr2H:674157523-674159023
HORVU.MOREX.r2.5HG0441740	- && Q9LE20.1 RecName: Full=Protein DETOXIFICATION 54; Short=AtDTX54; AltName: Full=Multidrug and toxic compound extrusion protein 54; Short=MATE protein 54; AltName: Full=Protein NOVEL ION CARRIER 2; Short=Protein NIC2 && PF01554:MatE	MatE	TGACATGCAGTGGTCA	chr5H:584774934-584776434
HORVU.MOREX.r2.1HG0067240	- && Q93VB5.1 RecName: Full=Heat stress transcription factor A-4d; AltName: Full=Heat stress transcription factor 10; Short=rHsf10; AltName: Full=Heat stress transcription factor 15; Short=OsHsf-15; AltName: Full=Protein SPOTTED LEAF 7 && PF00447:HSF-type	HSF_DNA-bind	TGTCACCAAGTGGGCA	chr1H:494661775-494663275
HORVU.MOREX.r2.5HG0401150	- && - && PF02517:CAAX protease self-immunity	-	TGACGTCCGTGTCA	chr5H:456081607-456083107
HORVU.MOREX.r2.3HG0187510	- && - && PF13962:Domain of unknown function|PF12796:Ankyrin repeats (3 copies)	-	TGACACTAGTGACA	chr3H:14111174-14112674
HORVU.MOREX.r2.3HG0224000	- && Q8VZG2.1 RecName: Full=Protein HYPER-SENSITIVITY-RELATED 4; Short=AtHSR4; AltName: Full=BCS1-like protein && PF14363:Domain associated at C-terminal with AAA|PF00004:ATPase family associated with various cellular activities (AAA)	AAA	TGTCATGTCATGGTGA	chr3H:356372026-356373526
HORVU.MOREX.r2.7HG0601890	- && Q9LMR3.1 RecName: Full=Arogenate dehydrogenase 2, chloroplastic; AltName: Full=TyrAAT2; Flags: Precursor && PF02153:Prephenate dehydrogenase	-	TGTCAGCTCATGGGCA	chr7H:563551303-563552803
HORVU.MOREX.r2.3HG0265650	- && Q9XIC7.1 RecName: Full=Somatic embryogenesis receptor kinase 2; Short=AtSERK2; AltName: Full=Somatic embryogenesis receptor-like kinase 2; Flags: Precursor && PF08263:Leucine rich repeat N-terminal domain	LRRNT_2	TGTCATGATGTAGTCA	chr3H:600999006-601000506
HORVU.MOREX.r2.2HG0110070	- && Q7XTF8.1 RecName: Full=Copper transporter 6; Short=OsCOPT6 && PF04145:Ctr copper transporter family	-	TGACAATTGGTGGTCA	chr2H:158653925-158655425
HORVU.MOREX.r2.3HG0240680	- && Q9XG83.1 RecName: Full=Gibberellin 2-beta-dioxygenase; AltName: Full=GA 2-oxidase; AltName: Full=Gibberellin 2-beta-hydroxylase; AltName: Full=Gibberellin 2-oxidase && PF03171:2OG-Fe(II) oxygenase superfamily|PF14226:non-haem dioxygenase in morphine	2OG-FeII_Oxy	TGACATGCATGACA	chr3H:498498813-498500313
HORVU.MOREX.r2.2HG0138670	- && - && PF02496:ABA/WDS induced protein	-	TGGCACGGCTGTCA	chr2H:482749723-482751223
HORVU.MOREX.r2.5HG0379640	- && Q9LZ20.1 RecName: Full=Cationic amino acid transporter 6, chloroplastic; Flags: Precursor && PF13906:C-terminus of AA_permease|PF13520:Amino acid permease	-	TGTCAAAATCTTGTCA	chr5H:275612800-275614300
HORVU.MOREX.r2.1HG0038730	- && - && PF01985:CRS1 / YhbY (CRM) domain	-	TGTCAGCGTCTGATCA	chr1H:331009673-331011173
HORVU.MOREX.r2.4HG0291950	- && - && -	-	TGTCACCTCATGGACA	chr4H:100277310-100278810
HORVU.MOREX.r2.3HG0229300	- && Q5SN75.1 RecName: Full=Probable protein phosphatase 2C 8; Short=OsPP2C08 && PF00481:Protein phosphatase 2C	PP2C	AGACAGGGGTGTCA	chr3H:409813048-409814548
HORVU.MOREX.r2.6HG0449500	- && Q9LMN6.1 RecName: Full=Wall-associated receptor kinase 4; Flags: Precursor && PF00069:Protein kinase domain|PF13947:Wall-associated receptor kinase galacturonan-binding	Pkinase	TGCCAATCAATGGTCA	chr6H:5017403-5018903
HORVU.MOREX.r2.5HG0394640	- && Q9SSD2.1 RecName: Full=Pre-mRNA-processing-splicing factor 8A; AltName: Full=PRP8 homolog A; Short=AtPRP8A; AltName: Full=Protein ABNORMAL SUSPENSOR 2; AltName: Full=Protein EMBRYO DEFECTIVE 14; AltName: Full=Protein EMBRYO DEFECTIVE 177; AltName: Fu	Mov34	TGTCCGAAACTGGTCA	chr5H:412790382-412791882
HORVU.MOREX.r2.2HG0129580	- && Q6NQE2.1 RecName: Full=Probable NAD(P)H dehydrogenase (quinone) FQR1-like 1 && PF03358:NADPH-dependent FMN reductase	FMN_red	TGACATGCATGACA	chr2H:390083774-390085274
HORVU.MOREX.r2.7HG0592850	- && Q9M8L2.1 RecName: Full=F-box/kelch-repeat protein At1g80440 && PF01344:Kelch motif	Kelch_1	TGACATGCATGACA	chr7H:498923040-498924540
HORVU.MOREX.r2.4HG0321850	- && O80634.2 RecName: Full=Photosynthetic NDH subunit of lumenal location 1, chloroplastic; AltName: Full=PsbP-like protein 2; Flags: Precursor && PF01789:PsbP	-	TGTCAGCCGGTGGCCG	chr4H:477210181-477211681
HORVU.MOREX.r2.5HG0400110	- && Q5SMM8.1 RecName: Full=Putrescine hydroxycinnamoyltransferase 1; Short=OsPHT1; AltName: Full=BAHD-like hydroxycinnamoyl transferase HCT3; AltName: Full=Hydroxycinnamoyltransferase 3; Short=OsHCT3 && PF02458:Transferase family	-	TGACAAATATGTCA	chr5H:448933497-448934997
HORVU.MOREX.r2.1HG0072360	- && Q5BLD8.1 RecName: Full=Protein N-lysine methyltransferase METTL21A; AltName: Full=Methyltransferase-like protein 21A && PF10294:Lysine methyltransferase	-	TGTCACTGTTTGTTCA	chr1H:505650009-505651509
HORVU.MOREX.r2.7HG0553150	- && Q9LN01.1 RecName: Full=Pentatricopeptide repeat-containing protein At1g08070, chloroplastic; AltName: Full=Protein ORGANELLE TRANSCRIPT PROCESSING 82; Flags: Precursor && PF14432:DYW family of nucleic acid deaminases|PF12854:PPR repeat|PF13041:PPR re	PPR	TGAGACCGGTGTCA	chr7H:92556304-92557804
HORVU.MOREX.r2.3HG0241270	- && - && PF13962:Domain of unknown function|PF12796:Ankyrin repeats (3 copies)	-	TGACAGACCTGTAA	chr3H:502101967-502103467
HORVU.MOREX.r2.6HG0496860	- && A2X7U1.2 RecName: Full=Homeobox-leucine zipper protein HOX24; AltName: Full=HD-ZIP protein HOX24; AltName: Full=Homeodomain transcription factor HOX24; AltName: Full=OsHox24 && PF02183:Homeobox associated leucine zipper|PF00046:Homeobox domain	Homeobox	TGTCAAGTTTTGGTAA	chr6H:408556347-408557847
HORVU.MOREX.r2.3HG0249020	- && Q9SI61.1 RecName: Full=Amidophosphoribosyltransferase 1, chloroplastic; Short=AtATase1; Short=PRPP1; AltName: Full=Glutamine phosphoribosylpyrophosphate amidotransferase 1; Short=AtGPRAT1; Flags: Precursor && PF13537:Glutamine amidotransferase domain	-	TGACAAGGCTATCA	chr3H:542053213-542054713
HORVU.MOREX.r2.6HG0459100	- && Q5KS50.1 RecName: Full=Coleoptile phototropism protein 1; AltName: Full=BTB/POZ domain-containing protein CPT1; AltName: Full=Non-phototropic hypocotyl 3-like protein; Short=NPH3-like protein && PF03000:NPH3 family	-	GGACAGGGTCTGGTCA	chr6H:33014900-33016400
HORVU.MOREX.r2.5HG0434150	- && Q8W593.1 RecName: Full=Probable lactoylglutathione lyase, chloroplastic; AltName: Full=Glyoxalase I; Flags: Precursor && PF00903:Glyoxalase/Bleomycin resistance protein/Dioxygenase superfamily	Glyoxalase	TGTCAGGGTTTGGTCG	chr5H:563765899-563767399
HORVU.MOREX.r2.6HG0508630	- && Q8L612.1 RecName: Full=MACPF domain-containing protein At1g14780 && PF01823:MAC/Perforin domain	-	GGTCACTAACTGGTCA	chr6H:505569956-505571456

## Sheet: Cis_oe_D_up(63)
ID	Gene description	TF family	GO term
HORVU.MOREX.r2.4HG0339540	- && B9DFU2.1 RecName: Full=Cytochrome P450 711A1; AltName: Full=Protein MORE AXILLARY BRANCHES 1 && PF00067:Cytochrome P450	p450	ID=HORVU.MOREX.r2.4HG0339540.1;Parent=HORVU.MOREX.r2.4HG0339540;description=Cytochrome P450, putative;ahrdqual=***;Ontology_term=GO:0004497,GO:0005506,GO:0016020,GO:0016021,GO:0016491,GO:0016705,GO:0020037,GO:0046872,GO:0055114,GO:0070330;primary_confidence_class=HC;secondary_condidence_class=HC1
HORVU.MOREX.r2.5HG0423960	- && Q9C503.1 RecName: Full=Protein NDH-DEPENDENT CYCLIC ELECTRON FLOW 5; Flags: Precursor && -	-	ID=HORVU.MOREX.r2.5HG0423960.1;Parent=HORVU.MOREX.r2.5HG0423960;description=Protein NDH-DEPENDENT CYCLIC ELECTRON FLOW 5;ahrdqual=***;Ontology_term=GO:0003824,GO:0005975,GO:0030246;primary_confidence_class=HC;secondary_condidence_class=HC1
HORVU.MOREX.r2.2HG0171960	- && Q6Z4T5.1 RecName: Full=DNA polymerase I A, chloroplastic; AltName: Full=DNA polymerase PolI-like A; Short=OsPolI-like A; AltName: Full=DNA polymerase gamma 1; Flags: Precursor && PF01612:3'-5' exonuclease|PF00476:DNA polymerase family A	3_5_exonuc	ID=HORVU.MOREX.r2.2HG0171960.1;Parent=HORVU.MOREX.r2.2HG0171960;description=DNA polymerase I;ahrdqual=***;Ontology_term=GO:0003676,GO:0003677,GO:0003887,GO:0006139,GO:0006260,GO:0006261,GO:0008408,GO:0071897,GO:0090305;primary_confidence_class=HC;secondary_condidence_class=HC1
HORVU.MOREX.r2.1HG0002830	- && - && -	-	ID=HORVU.MOREX.r2.1HG0002830.1;Parent=HORVU.MOREX.r2.1HG0002830;description=Apo-citrate lyase phosphoribosyl-dephospho-CoA transferase;ahrdqual=--*;Ontology_term=GO:0016740,GO:0016779,GO:0050519,GO:0051191;primary_confidence_class=HC;secondary_condidence_class=HC2
HORVU.MOREX.r2.4HG0321020	- && A2XFC1.2 RecName: Full=DNA topoisomerase 6 subunit A3; Short=OsTOP6A3; AltName: Full=DNA topoisomerase 6 subunit A; Short=OsTOP6A; AltName: Full=Meiotic recombination protein SPO11-3 >Q0DSV9.2 RecName: Full=Topoisomerase 6 subunit A3; Short=OsTOP6A3;	-	ID=HORVU.MOREX.r2.4HG0321020.1;Parent=HORVU.MOREX.r2.4HG0321020;description=DNA topoisomerase 6 subunit A;ahrdqual=***;Ontology_term=GO:0000166,GO:0000287,GO:0000737,GO:0003677,GO:0003824,GO:0003916,GO:0003918,GO:0005524,GO:0005634,GO:0005694,GO:0006259,GO:0006265,GO:0009330,GO:0016853,GO:0046872,GO:0061505;primary_confidence_class=HC;secondary_condidence_class=HC1
HORVU.MOREX.r2.6HG0516480	- && - && PF13474:SnoaL-like domain	-	ID=HORVU.MOREX.r2.6HG0516480.1;Parent=HORVU.MOREX.r2.6HG0516480;description=F-box protein SKIP8;ahrdqual=***;Ontology_term=GO:0000166,GO:0003951,GO:0004143,GO:0005524,GO:0007165,GO:0007205,GO:0008152,GO:0016301,GO:0016310,GO:0016740;primary_confidence_class=HC;secondary_condidence_class=HC2
HORVU.MOREX.r2.5HG0412540	- && Q55720.1 RecName: Full=Ycf49-like protein && PF10693:Protein of unknown function (DUF2499)	-	ID=HORVU.MOREX.r2.5HG0412540.1;Parent=HORVU.MOREX.r2.5HG0412540;description=Ycf49-like protein;ahrdqual=***;Ontology_term=GO:0016020,GO:0016021;primary_confidence_class=HC;secondary_condidence_class=HC2
HORVU.MOREX.r2.1HG0073220	- && A5GI62.1 RecName: Full=Ribosome maturation factor RimM && PF01782:RimM N-terminal domain	RimM	ID=HORVU.MOREX.r2.1HG0073220.1;Parent=HORVU.MOREX.r2.1HG0073220;description=Ribosome maturation factor rimM;ahrdqual=***;Ontology_term=GO:0005840,GO:0006364,GO:0009507,GO:0043022;primary_confidence_class=HC;secondary_condidence_class=HC2
HORVU.MOREX.r2.2HG0168190	- && P13564.2 RecName: Full=Glutamine synthetase leaf isozyme, chloroplastic; AltName: Full=GS2; AltName: Full=Glutamate--ammonia ligase; Flags: Precursor && PF00120:Glutamine synthetase, catalytic domain|PF03951:Glutamine synthetase, beta-Grasp domain	-	ID=HORVU.MOREX.r2.2HG0168190.1;Parent=HORVU.MOREX.r2.2HG0168190;description=Glutamine synthetase;ahrdqual=***;Ontology_term=GO:0000166,GO:0003824,GO:0004356,GO:0005524,GO:0005739,GO:0006542,GO:0006807,GO:0009507,GO:0009535,GO:0009570,GO:0009579,GO:0009651,GO:0009735,GO:0009941,GO:0016020,GO:0016874,GO:0022626,GO:0046686,GO:0048046;primary_confidence_class=HC;secondary_condidence_class=HC1
HORVU.MOREX.r2.6HG0460140	- && - && -	-	ID=HORVU.MOREX.r2.6HG0460140.1;Parent=HORVU.MOREX.r2.6HG0460140;description=Endoglucanase 11;ahrdqual=***;Ontology_term=GO:0003824,GO:0004553,GO:0005975;primary_confidence_class=HC;secondary_condidence_class=HC2
HORVU.MOREX.r2.3HG0192320	- && Q9S7I6.1 RecName: Full=LRR receptor-like serine/threonine-protein kinase RPK2; AltName: Full=Protein TOADSTOOL 2; AltName: Full=Receptor-like protein kinase 2; Flags: Precursor && PF08263:Leucine rich repeat N-terminal domain|PF00069:Protein kinase d	Pkinase	ID=HORVU.MOREX.r2.3HG0192320.1;Parent=HORVU.MOREX.r2.3HG0192320;description=Receptor-like protein kinase;ahrdqual=***;Ontology_term=GO:0000166,GO:0004672,GO:0004674,GO:0005524,GO:0005576,GO:0005886,GO:0006468,GO:0016020,GO:0016021,GO:0016301,GO:0016310,GO:0016740,GO:0019199;primary_confidence_class=HC;secondary_condidence_class=HC1
HORVU.MOREX.r2.7HG0619040	- && - && PF02620:Uncharacterized ACR, COG1399	-	ID=HORVU.MOREX.r2.7HG0619040.1;Parent=HORVU.MOREX.r2.7HG0619040;description=Glyceraldehyde-3-phosphate dehydrogenase;ahrdqual=--*;Ontology_term=GO:0000166,GO:0004365,GO:0005737,GO:0006006,GO:0006096,GO:0016491,GO:0016620,GO:0050661,GO:0051287,GO:0055114;primary_confidence_class=HC;secondary_condidence_class=HC2
HORVU.MOREX.r2.1HG0072210	- && Q8S985.1 RecName: Full=Auxin response factor 15; AltName: Full=ETTIN-like protein 1; AltName: Full=OsETTIN1 && PF06507:Auxin response factor|PF02362:B3 DNA binding domain	Auxin_resp	ID=HORVU.MOREX.r2.1HG0072210.1;Parent=HORVU.MOREX.r2.1HG0072210;description=Auxin response factor;ahrdqual=***;Ontology_term=GO:0003677,GO:0005634,GO:0006351,GO:0006355,GO:0009725,GO:0009734;primary_confidence_class=HC;secondary_condidence_class=HC1
HORVU.MOREX.r2.5HG0425730	- && O65351.1 RecName: Full=Subtilisin-like protease SBT1.7; AltName: Full=Cucumisin-like serine protease; AltName: Full=Subtilase subfamily 1 member 7; Short=AtSBT1.7; AltName: Full=Subtilisin-like serine protease 1; Short=At-SLP1; Flags: Precursor && PF	Peptidase_S8	ID=HORVU.MOREX.r2.5HG0425730.1;Parent=HORVU.MOREX.r2.5HG0425730;description=Subtilisin-like protease;ahrdqual=***;Ontology_term=GO:0004252,GO:0006508,GO:0008233,GO:0016787;primary_confidence_class=HC;secondary_condidence_class=HC1
HORVU.MOREX.r2.2HG0163870	- && Q4QTJ2.1 RecName: Full=S-norcoclaurine synthase 1; Short=PsNCS1; Flags: Precursor && PF00407:Pathogenesis-related protein Bet v I family	-	ID=HORVU.MOREX.r2.2HG0163870.1;Parent=HORVU.MOREX.r2.2HG0163870;description=Pathogenesis-related (PR)-10-related norcoclaurine synthase-like protein;ahrdqual=***;Ontology_term=GO:0006952,GO:0009607,GO:0016020,GO:0016021,GO:0016829,GO:0050474;primary_confidence_class=HC;secondary_condidence_class=HC1
HORVU.MOREX.r2.5HG0408920	- && - && PF13920:Zinc finger, C3HC4 type (RING finger)	-	ID=HORVU.MOREX.r2.5HG0408920.1;Parent=HORVU.MOREX.r2.5HG0408920;description=RING/U-box superfamily protein;ahrdqual=*-*;Ontology_term=GO:0000166,GO:0000266,GO:0001917,GO:0003374,GO:0003924,GO:0005515,GO:0005525,GO:0005737,GO:0005794,GO:0005856,GO:0005874,GO:0006897,GO:0007416,GO:0008017,GO:0014069,GO:0016185,GO:0016787,GO:0030424,GO:0031798,GO:0031802,GO:0031966,GO:0042802,GO:0043083,GO:0043197,G…
HORVU.MOREX.r2.6HG0502610	- && P26302.1 RecName: Full=Phosphoribulokinase, chloroplastic; Short=PRK; Short=PRKase; AltName: Full=Phosphopentokinase; Flags: Precursor && PF00485:Phosphoribulokinase / Uridine kinase family	-	ID=HORVU.MOREX.r2.6HG0502610.1;Parent=HORVU.MOREX.r2.6HG0502610;description=Phosphoribulokinase;ahrdqual=***;Ontology_term=GO:0005524,GO:0005975,GO:0008152,GO:0008974,GO:0016301,GO:0016310;primary_confidence_class=HC;secondary_condidence_class=HC1
HORVU.MOREX.r2.7HG0620030	- && A8QW51.1 RecName: Full=Probable O-methyltransferase 2; Short=SbOMT2 && PF00891:O-methyltransferase|PF08100:Dimerisation domain	-	ID=HORVU.MOREX.r2.7HG0620030.1;Parent=HORVU.MOREX.r2.7HG0620030;description=O-methyltransferase;ahrdqual=***;Ontology_term=GO:0008168,GO:0008171,GO:0016740,GO:0032259,GO:0046983;primary_confidence_class=HC;secondary_condidence_class=HC1
HORVU.MOREX.r2.1HG0076970	- && - && -	-	ID=HORVU.MOREX.r2.1HG0076970.1;Parent=HORVU.MOREX.r2.1HG0076970;description=muscle M-line assembly protein;ahrdqual=*-*;Ontology_term=GO:0003964,GO:0006278;primary_confidence_class=HC;secondary_condidence_class=HC2
HORVU.MOREX.r2.6HG0522340	- && Q9FG13.1 RecName: Full=Probable carboxylesterase 15; AltName: Full=AtCXE15 && PF07859:alpha/beta hydrolase fold	Abhydrolase_3	ID=HORVU.MOREX.r2.6HG0522340.1;Parent=HORVU.MOREX.r2.6HG0522340;description=Alpha/beta-Hydrolases superfamily protein, putative;ahrdqual=***;Ontology_term=GO:0008152,GO:0016787;primary_confidence_class=HC;secondary_condidence_class=HC1
HORVU.MOREX.r2.4HG0302250	- && - && PF13418:Galactose oxidase, central domain	-	ID=HORVU.MOREX.r2.4HG0302250.1;Parent=HORVU.MOREX.r2.4HG0302250;description=Acyl-CoA-binding domain-containing protein 4;ahrdqual=***;Ontology_term=GO:0000166,GO:0003824,GO:0005737,GO:0008152,GO:0008253,GO:0009117,GO:0016311,GO:0016787,GO:0046872;primary_confidence_class=HC;secondary_condidence_class=HC2
HORVU.MOREX.r2.4HG0297270	- && P17801.2 RecName: Full=Putative receptor protein kinase ZmPK1; Flags: Precursor && PF00069:Protein kinase domain|PF00954:S-locus glycoprotein domain|PF01453:D-mannose binding lectin	Pkinase	ID=HORVU.MOREX.r2.4HG0297270.1;Parent=HORVU.MOREX.r2.4HG0297270;description=Serine/threonine-protein kinase;ahrdqual=***;Ontology_term=GO:0000166,GO:0004672,GO:0004674,GO:0005524,GO:0005886,GO:0006468,GO:0016020,GO:0016021,GO:0016301,GO:0016310,GO:0016740,GO:0048544;primary_confidence_class=HC;secondary_condidence_class=HC1
HORVU.MOREX.r2.5HG0364780	- && - && PF08246:Cathepsin propeptide inhibitor domain (I29)	-	ID=HORVU.MOREX.r2.5HG0364780.1;Parent=HORVU.MOREX.r2.5HG0364780;description=Cysteine protease;ahrdqual=*-*;Ontology_term=GO:0006508,GO:0008233,GO:0008234;primary_confidence_class=HC;secondary_condidence_class=HC2
HORVU.MOREX.r2.3HG0186540	- && Q9XEA0.1 RecName: Full=Leucine--tRNA ligase, chloroplastic/mitochondrial; AltName: Full=Leucyl-tRNA synthetase; Short=LeuRS; AltName: Full=Protein EMBRYO DEFECTIVE 2369; Flags: Precursor && PF13603:Leucyl-tRNA synthetase, Domain 2|PF08264:Anticodon-b	-	ID=HORVU.MOREX.r2.3HG0186540.1;Parent=HORVU.MOREX.r2.3HG0186540;description=Leucine--tRNA ligase;ahrdqual=***;Ontology_term=GO:0000166,GO:0002161,GO:0004812,GO:0004823,GO:0005524,GO:0006412,GO:0006418,GO:0006429,GO:0016874,GO:0106074;primary_confidence_class=HC;secondary_condidence_class=HC1
HORVU.MOREX.r2.5HG0402270	- && Q0J1C1.1 RecName: Full=1-aminocyclopropane-1-carboxylate oxidase 1; Short=ACC oxidase 1; AltName: Full=Ethylene-forming enzyme; Short=EFE && PF03171:2OG-Fe(II) oxygenase superfamily|PF14226:non-haem dioxygenase in morphine synthesis N-terminal	2OG-FeII_Oxy	ID=HORVU.MOREX.r2.5HG0402270.1;Parent=HORVU.MOREX.r2.5HG0402270;description=1-aminocyclopropane-1-carboxylate oxidase;ahrdqual=***;Ontology_term=GO:0016491,GO:0046872,GO:0055114;primary_confidence_class=HC;secondary_condidence_class=HC1
HORVU.MOREX.r2.5HG0440080	- && O23755.1 RecName: Full=Elongation factor 2; Short=EF-2 && PF03764:Elongation factor G, domain IV|PF00009:Elongation factor Tu GTP binding domain|PF03144:Elongation factor Tu domain 2|PF14492:Elongation Factor G, domain II|PF00679:Elongation factor G	GTP_EFTU	ID=HORVU.MOREX.r2.5HG0440080.1;Parent=HORVU.MOREX.r2.5HG0440080;description=Elongation factor;ahrdqual=***;Ontology_term=GO:0003746,GO:0003924,GO:0005525,GO:0006414;primary_confidence_class=HC;secondary_condidence_class=HC1
HORVU.MOREX.r2.5HG0441740	- && Q9LE20.1 RecName: Full=Protein DETOXIFICATION 54; Short=AtDTX54; AltName: Full=Multidrug and toxic compound extrusion protein 54; Short=MATE protein 54; AltName: Full=Protein NOVEL ION CARRIER 2; Short=Protein NIC2 && PF01554:MatE	MatE	ID=HORVU.MOREX.r2.5HG0441740.1;Parent=HORVU.MOREX.r2.5HG0441740;description=Protein DETOXIFICATION;ahrdqual=***;Ontology_term=GO:0006855,GO:0015238,GO:0015297,GO:0016020,GO:0016021,GO:0055085;primary_confidence_class=HC;secondary_condidence_class=HC1
HORVU.MOREX.r2.5HG0383720	- && Q0D3J9.1 RecName: Full=Zinc finger CCCH domain-containing protein 53; Short=OsC3H53 && PF16131:Torus domain	-	ID=HORVU.MOREX.r2.5HG0383720.1;Parent=HORVU.MOREX.r2.5HG0383720;description=RNA-binding domain CCCH-type zinc finger protein;ahrdqual=***;Ontology_term=GO:0003676,GO:0003723,GO:0046872;primary_confidence_class=HC;secondary_condidence_class=HC2
HORVU.MOREX.r2.3HG0208840	- && Q9LSM9.2 RecName: Full=Serine carboxypeptidase-like 33; Flags: Precursor && PF00450:Serine carboxypeptidase	Peptidase_S10	ID=HORVU.MOREX.r2.3HG0208840.1;Parent=HORVU.MOREX.r2.3HG0208840;description=Carboxypeptidase;ahrdqual=***;Ontology_term=GO:0004180,GO:0004185,GO:0006508,GO:0008233,GO:0016787;primary_confidence_class=HC;secondary_condidence_class=HC1
HORVU.MOREX.r2.5HG0401150	- && - && PF02517:CAAX protease self-immunity	-	ID=HORVU.MOREX.r2.5HG0401150.1;Parent=HORVU.MOREX.r2.5HG0401150;description=CAAX amino terminal protease family protein;ahrdqual=***;Ontology_term=GO:0006508,GO:0008233,GO:0016020,GO:0016021;primary_confidence_class=HC;secondary_condidence_class=HC2
HORVU.MOREX.r2.1HG0008380	- && Q6NQJ6.1 RecName: Full=Ribonuclease II, chloroplastic/mitochondrial; Short=AtmtRNaseII; Short=RNase II; AltName: Full=Protein EMBRYO DEFECTIVE 2730; AltName: Full=Ribonucleotide reductase 1; Flags: Precursor && PF00773:RNB domain	RNB	ID=HORVU.MOREX.r2.1HG0008380.1;Parent=HORVU.MOREX.r2.1HG0008380;description=DIS3-like exonuclease 2;ahrdqual=*-*;Ontology_term=GO:0000175,GO:0000291,GO:0000932,GO:0003723,GO:0004518,GO:0004527,GO:0005737,GO:0016787,GO:0034427,GO:0046872,GO:0090305,GO:0090503,GO:1990074;primary_confidence_class=HC;secondary_condidence_class=HC1
HORVU.MOREX.r2.5HG0381850	- && - && PF03435:Saccharopine dehydrogenase NADP binding domain	Saccharop_dh	ID=HORVU.MOREX.r2.5HG0381850.1;Parent=HORVU.MOREX.r2.5HG0381850;description=Saccharopine dehydrogenase family protein, expressed;ahrdqual=***;Ontology_term=GO:0016491,GO:0055114;primary_confidence_class=HC;secondary_condidence_class=HC2
HORVU.MOREX.r2.7HG0601890	- && Q9LMR3.1 RecName: Full=Arogenate dehydrogenase 2, chloroplastic; AltName: Full=TyrAAT2; Flags: Precursor && PF02153:Prephenate dehydrogenase	-	ID=HORVU.MOREX.r2.7HG0601890.1;Parent=HORVU.MOREX.r2.7HG0601890;description=Arogenate dehydrogenase;ahrdqual=*-*;Ontology_term=GO:0004665,GO:0006571,GO:0008977,GO:0055114;primary_confidence_class=HC;secondary_condidence_class=HC1
HORVU.MOREX.r2.7HG0539650	- && - && PF09353:Domain of unknown function (DUF1995)	-	ID=HORVU.MOREX.r2.7HG0539650.1;Parent=HORVU.MOREX.r2.7HG0539650;description=DUF1995 domain protein;ahrdqual=***;Ontology_term=GO:0009507;primary_confidence_class=HC;secondary_condidence_class=HC2
HORVU.MOREX.r2.4HG0277800	- && Q9SGU2.1 RecName: Full=Auxin-responsive protein SAUR71; AltName: Full=Protein SMALL AUXIN UP RNA 71 && PF02519:Auxin responsive protein	Auxin_inducible	ID=HORVU.MOREX.r2.4HG0277800.1;Parent=HORVU.MOREX.r2.4HG0277800;description=Auxin responsive protein;ahrdqual=***;Ontology_term=GO:0009733;primary_confidence_class=HC;secondary_condidence_class=HC1
HORVU.MOREX.r2.3HG0241800	- && Q9FL87.1 RecName: Full=Protein CHLORORESPIRATORY REDUCTION 7, chloroplastic; Flags: Precursor && PF12095:Protein of unknown function (DUF3571)	-	ID=HORVU.MOREX.r2.3HG0241800.1;Parent=HORVU.MOREX.r2.3HG0241800;description=Chlororespiratory reduction 7;ahrdqual=***;Ontology_term=GO:0006629,GO:0008081;primary_confidence_class=HC;secondary_condidence_class=HC2
HORVU.MOREX.r2.1HG0057060	- && Q9LVM0.1 RecName: Full=Probable inactive receptor kinase At5g58300; Flags: Precursor && PF07714:Protein tyrosine kinase|PF08263:Leucine rich repeat N-terminal domain	Pkinase_Tyr	ID=HORVU.MOREX.r2.1HG0057060.1;Parent=HORVU.MOREX.r2.1HG0057060;description=Receptor-like kinase;ahrdqual=***;Ontology_term=GO:0000166,GO:0004672,GO:0005524,GO:0006468,GO:0016020,GO:0016021,GO:0016301,GO:0016310;primary_confidence_class=HC;secondary_condidence_class=HC1
HORVU.MOREX.r2.2HG0085290	- && Q9LVV5.2 RecName: Full=Thylakoid lumenal 15.0 kDa protein 2, chloroplastic; Flags: Precursor && -	-	ID=HORVU.MOREX.r2.2HG0085290.1;Parent=HORVU.MOREX.r2.2HG0085290;description=Thylakoid lumenal 15.0 kDa protein 2, chloroplastic;ahrdqual=*-*;Ontology_term=GO:0000139,GO:0000938,GO:0005829,GO:0009507,GO:0042147;primary_confidence_class=HC;secondary_condidence_class=HC2
HORVU.MOREX.r2.5HG0422470	- && - && -	-	ID=HORVU.MOREX.r2.5HG0422470.1;Parent=HORVU.MOREX.r2.5HG0422470;description=Serine/threonine-protein kinase TAO1;ahrdqual=--*;Ontology_term=GO:0000165,GO:0000166,GO:0000186,GO:0004672,GO:0004674,GO:0004709,GO:0005524,GO:0005737,GO:0006281,GO:0006468,GO:0006915,GO:0006974,GO:0007095,GO:0007346,GO:0007399,GO:0008022,GO:0016301,GO:0016310,GO:0016740,GO:0019901,GO:0030295,GO:0031098,GO:0031489,GO:003…
HORVU.MOREX.r2.2HG0131320	- && O23342.1 RecName: Full=Preprotein translocase subunit SECE1; Flags: Precursor && -	-	ID=HORVU.MOREX.r2.2HG0131320.1;Parent=HORVU.MOREX.r2.2HG0131320;description=Preprotein translocase subunit SECE1;ahrdqual=*-*;Ontology_term=GO:0016020,GO:0016021;primary_confidence_class=HC;secondary_condidence_class=HC1
HORVU.MOREX.r2.7HG0618470	- && Q94FM7.2 RecName: Full=5-epiaristolochene 1,3-dihydroxylase; Short=NtEAH; AltName: Full=Cytochrome P450 71D20 && PF00067:Cytochrome P450	p450	ID=HORVU.MOREX.r2.7HG0618470.1;Parent=HORVU.MOREX.r2.7HG0618470;description=Cytochrome P450;ahrdqual=***;Ontology_term=GO:0004497,GO:0005506,GO:0016491,GO:0016705,GO:0020037,GO:0046872,GO:0055114;primary_confidence_class=HC;secondary_condidence_class=HC1
HORVU.MOREX.r2.2HG0157070	- && O81304.1 RecName: Full=Probable plastid-lipid-associated protein 11; AltName: Full=Fibrillin-9 && PF04755:PAP_fibrillin	-	ID=HORVU.MOREX.r2.2HG0157070.1;Parent=HORVU.MOREX.r2.2HG0157070;description=Plastid-lipid associated protein PAP / fibrillin family protein;ahrdqual=***;Ontology_term=GO:0000166,GO:0000287,GO:0004012,GO:0005524,GO:0015914,GO:0016020,GO:0016021,GO:0016787,GO:0045332;primary_confidence_class=HC;secondary_condidence_class=HC1
HORVU.MOREX.r2.1HG0038730	- && - && PF01985:CRS1 / YhbY (CRM) domain	-	ID=HORVU.MOREX.r2.1HG0038730.1;Parent=HORVU.MOREX.r2.1HG0038730;description=CRS1 / YhbY (CRM) domain-containing protein;ahrdqual=--*;Ontology_term=GO:0003723;primary_confidence_class=HC;secondary_condidence_class=HC2
HORVU.MOREX.r2.2HG0127670	- && Q7H6J0.1 RecName: Full=DNA-directed RNA polymerase subunit alpha; Short=PEP; AltName: Full=Plastid-encoded RNA polymerase subunit alpha; Short=RNA polymerase subunit alpha >Q7H6J1.1 RecName: Full=DNA-directed RNA polymerase subunit alpha; Short=PEP;	RNA_pol_A_bac	ID=HORVU.MOREX.r2.2HG0127670.1;Parent=HORVU.MOREX.r2.2HG0127670;description=DNA-directed RNA polymerase subunit alpha;ahrdqual=*-*;Ontology_term=GO:0003677,GO:0003735,GO:0003899,GO:0005840,GO:0006351,GO:0006412,GO:0046983;primary_confidence_class=HC;secondary_condidence_class=HC2
HORVU.MOREX.r2.2HG0092740	- && - && PF00578:AhpC/TSA family	-	ID=HORVU.MOREX.r2.2HG0092740.1;Parent=HORVU.MOREX.r2.2HG0092740;description=Peroxiredoxin;ahrdqual=***;Ontology_term=GO:0005623,GO:0016209,GO:0016491,GO:0045454,GO:0055114,GO:0098869;primary_confidence_class=HC;secondary_condidence_class=HC2
HORVU.MOREX.r2.3HG0274190	- && Q3AHX9.1 RecName: Full=Probable dual-specificity RNA methyltransferase RlmN; AltName: Full=23S rRNA (adenine(2503)-C(2))-methyltransferase; AltName: Full=23S rRNA m2A2503 methyltransferase; AltName: Full=Ribosomal RNA large subunit methyltransferase	Radical_SAM	ID=HORVU.MOREX.r2.3HG0274190.1;Parent=HORVU.MOREX.r2.3HG0274190;description=Dual-specificity RNA methyltransferase RlmN;ahrdqual=***;Ontology_term=GO:0001510,GO:0003824,GO:0005737,GO:0006364,GO:0008168,GO:0008173,GO:0016740,GO:0032259,GO:0051536;primary_confidence_class=HC;secondary_condidence_class=HC2
HORVU.MOREX.r2.5HG0394640	- && Q9SSD2.1 RecName: Full=Pre-mRNA-processing-splicing factor 8A; AltName: Full=PRP8 homolog A; Short=AtPRP8A; AltName: Full=Protein ABNORMAL SUSPENSOR 2; AltName: Full=Protein EMBRYO DEFECTIVE 14; AltName: Full=Protein EMBRYO DEFECTIVE 177; AltName: Fu	Mov34	ID=HORVU.MOREX.r2.5HG0394640.1;Parent=HORVU.MOREX.r2.5HG0394640;description=Pre-mRNA-processing-splicing factor 8;ahrdqual=***;Ontology_term=GO:0000398,GO:0003723,GO:0005681,GO:0017070,GO:0030623;primary_confidence_class=HC;secondary_condidence_class=HC1
HORVU.MOREX.r2.2HG0108480	- && P10708.1 RecName: Full=Chlorophyll a-b binding protein 7, chloroplastic; AltName: Full=LHCI type II CAB-7; Flags: Precursor && PF00504:Chlorophyll A-B binding protein	-	ID=HORVU.MOREX.r2.2HG0108480.1;Parent=HORVU.MOREX.r2.2HG0108480;description=Chlorophyll a-b binding protein, chloroplastic;ahrdqual=***;Ontology_term=GO:0009507,GO:0009522,GO:0009523,GO:0009535,GO:0009536,GO:0009579,GO:0009765,GO:0015979,GO:0016020,GO:0016021,GO:0016168,GO:0018298;primary_confidence_class=HC;secondary_condidence_class=HC1
HORVU.MOREX.r2.3HG0253820	Thioredoxin family protein		ID=HORVU.MOREX.r2.3HG0253820.1;Parent=HORVU.MOREX.r2.3HG0253820;description=Thioredoxin family protein;ahrdqual=***;Ontology_term=GO:0006355,GO:0009658,GO:0042644;primary_confidence_class=HC;secondary_condidence_class=HC2
HORVU.MOREX.r2.7HG0592850	- && Q9M8L2.1 RecName: Full=F-box/kelch-repeat protein At1g80440 && PF01344:Kelch motif	Kelch_1	ID=HORVU.MOREX.r2.7HG0592850.1;Parent=HORVU.MOREX.r2.7HG0592850;description=Kelch repeat protein;ahrdqual=*-*;Ontology_term=GO:0000166,GO:0000723,GO:0003678,GO:0004386,GO:0005524,GO:0006281,GO:0006310,GO:0006974,GO:0016787,GO:0032508;primary_confidence_class=HC;secondary_condidence_class=HC1
HORVU.MOREX.r2.2HG0116980	- && Q6Z4A7.1 RecName: Full=Probable 5'-adenylylsulfate reductase 1, chloroplastic; AltName: Full=Adenosine 5'-phosphosulfate 5'-adenylylsulfate sulfotransferase 1; Short=APS sulfotransferase 1; AltName: Full=Adenosine 5'-phosphosulfate reductase-like 1;	-	ID=HORVU.MOREX.r2.2HG0116980.1;Parent=HORVU.MOREX.r2.2HG0116980;description=Phosphoadenosine phosphosulfate reductase;ahrdqual=***;Ontology_term=GO:0003824,GO:0008152,GO:0016671,GO:0019419,GO:0055114;primary_confidence_class=HC;secondary_condidence_class=HC1
HORVU.MOREX.r2.4HG0321850	- && O80634.2 RecName: Full=Photosynthetic NDH subunit of lumenal location 1, chloroplastic; AltName: Full=PsbP-like protein 2; Flags: Precursor && PF01789:PsbP	-	ID=HORVU.MOREX.r2.4HG0321850.1;Parent=HORVU.MOREX.r2.4HG0321850;description=PsbP family protein, expressed;ahrdqual=*-*;Ontology_term=GO:0005509,GO:0009523,GO:0009654,GO:0015979,GO:0016020,GO:0016021,GO:0019898;primary_confidence_class=HC;secondary_condidence_class=HC1
HORVU.MOREX.r2.7HG0549360	- && Q5G1S8.2 RecName: Full=Pentatricopeptide repeat-containing protein At3g18110, chloroplastic; AltName: Full=Protein EMBRYO DEFECTIVE 1270; Flags: Precursor && PF12854:PPR repeat|PF13041:PPR repeat family	-	ID=HORVU.MOREX.r2.7HG0549360.1;Parent=HORVU.MOREX.r2.7HG0549360;description=Pentatricopeptide repeat-containing protein;ahrdqual=***;Ontology_term=GO:0000166,GO:0005524,GO:0005737,GO:0008360,GO:0008716,GO:0009252,GO:0016874,GO:0046872,GO:0071555;primary_confidence_class=HC;secondary_condidence_class=HC1
HORVU.MOREX.r2.5HG0351690	- && P41096.1 RecName: Full=50S ribosomal protein L2, chloroplastic >A1EA50.1 RecName: Full=50S ribosomal protein L2, chloroplastic >A8Y9C8.1 RecName: Full=50S ribosomal protein L2, chloroplastic && PF03947:Ribosomal Proteins L2, C-terminal domain|PF00203	Ribosomal_L2_C	ID=HORVU.MOREX.r2.5HG0351690.1;Parent=HORVU.MOREX.r2.5HG0351690;description=50S ribosomal protein L2;ahrdqual=***;Ontology_term=GO:0003723,GO:0003735,GO:0005622,GO:0005840,GO:0006412,GO:0015934,GO:0016740;primary_confidence_class=HC;secondary_condidence_class=HC2
HORVU.MOREX.r2.5HG0400110	- && Q5SMM8.1 RecName: Full=Putrescine hydroxycinnamoyltransferase 1; Short=OsPHT1; AltName: Full=BAHD-like hydroxycinnamoyl transferase HCT3; AltName: Full=Hydroxycinnamoyltransferase 3; Short=OsHCT3 && PF02458:Transferase family	-	ID=HORVU.MOREX.r2.5HG0400110.1;Parent=HORVU.MOREX.r2.5HG0400110;description=Hydroxycinnamoyl-CoA shikimate/quinate hydroxycinnamoyltransferase;ahrdqual=***;Ontology_term=GO:0016740,GO:0016747;primary_confidence_class=HC;secondary_condidence_class=HC1
HORVU.MOREX.r2.1HG0072360	- && Q5BLD8.1 RecName: Full=Protein N-lysine methyltransferase METTL21A; AltName: Full=Methyltransferase-like protein 21A && PF10294:Lysine methyltransferase	-	ID=HORVU.MOREX.r2.1HG0072360.1;Parent=HORVU.MOREX.r2.1HG0072360;description=Protein-lysine methyltransferase METTL21D;ahrdqual=***;Ontology_term=GO:0008168,GO:0016740,GO:0032259;primary_confidence_class=HC;secondary_condidence_class=HC2
HORVU.MOREX.r2.7HG0553150	- && Q9LN01.1 RecName: Full=Pentatricopeptide repeat-containing protein At1g08070, chloroplastic; AltName: Full=Protein ORGANELLE TRANSCRIPT PROCESSING 82; Flags: Precursor && PF14432:DYW family of nucleic acid deaminases|PF12854:PPR repeat|PF13041:PPR re	PPR	ID=HORVU.MOREX.r2.7HG0553150.1;Parent=HORVU.MOREX.r2.7HG0553150;description=Pentatricopeptide repeat-containing protein;ahrdqual=***;Ontology_term=GO:0008270;primary_confidence_class=HC;secondary_condidence_class=HC1
HORVU.MOREX.r2.2HG0104420	- && Q59324.1 RecName: Full=2-hydroxy-6-oxo-6-phenylhexa-2,4-dienoate hydrolase; Short=HOPDA hydrolase; AltName: Full=2,6-dioxo-6-phenylhexa-3-enoate hydrolase && PF12695:Alpha/beta hydrolase family	-	ID=HORVU.MOREX.r2.2HG0104420.1;Parent=HORVU.MOREX.r2.2HG0104420;description=Alpha/beta hydrolase, putative;ahrdqual=***;Ontology_term=GO:0003824,GO:0016787;primary_confidence_class=HC;secondary_condidence_class=HC2
HORVU.MOREX.r2.3HG0249020	- && Q9SI61.1 RecName: Full=Amidophosphoribosyltransferase 1, chloroplastic; Short=AtATase1; Short=PRPP1; AltName: Full=Glutamine phosphoribosylpyrophosphate amidotransferase 1; Short=AtGPRAT1; Flags: Precursor && PF13537:Glutamine amidotransferase domain	-	ID=HORVU.MOREX.r2.3HG0249020.1;Parent=HORVU.MOREX.r2.3HG0249020;description=Amidophosphoribosyltransferase;ahrdqual=***;Ontology_term=GO:0004044,GO:0006164,GO:0006189,GO:0009113,GO:0009116,GO:0016740,GO:0016757,GO:0046872,GO:0051536;primary_confidence_class=HC;secondary_condidence_class=HC1
HORVU.MOREX.r2.4HG0283500	- && Q9SW80.3 RecName: Full=BEL1-like homeodomain protein 2; Short=BEL1-like protein 2; AltName: Full=Protein SAWTOOTH 1 && PF07526:Associated with HOX|PF05920:Homeobox KN domain	POX	ID=HORVU.MOREX.r2.4HG0283500.1;Parent=HORVU.MOREX.r2.4HG0283500;description=Homeobox protein bel1-like protein;ahrdqual=*-*;Ontology_term=GO:0003677,GO:0005634,GO:0005829,GO:0006355,GO:0009506;primary_confidence_class=HC;secondary_condidence_class=HC2
HORVU.MOREX.r2.5HG0434150	- && Q8W593.1 RecName: Full=Probable lactoylglutathione lyase, chloroplastic; AltName: Full=Glyoxalase I; Flags: Precursor && PF00903:Glyoxalase/Bleomycin resistance protein/Dioxygenase superfamily	Glyoxalase	ID=HORVU.MOREX.r2.5HG0434150.1;Parent=HORVU.MOREX.r2.5HG0434150;description=Lactoylglutathione lyase;ahrdqual=***;Ontology_term=GO:0004462,GO:0016829,GO:0046872;primary_confidence_class=HC;secondary_condidence_class=HC1
HORVU.MOREX.r2.6HG0459100	- && Q5KS50.1 RecName: Full=Coleoptile phototropism protein 1; AltName: Full=BTB/POZ domain-containing protein CPT1; AltName: Full=Non-phototropic hypocotyl 3-like protein; Short=NPH3-like protein && PF03000:NPH3 family	-	ID=HORVU.MOREX.r2.6HG0459100.1;Parent=HORVU.MOREX.r2.6HG0459100;description=Phototropic-responsive NPH3 family protein;ahrdqual=***;Ontology_term=GO:0016567;primary_confidence_class=HC;secondary_condidence_class=HC1
HORVU.MOREX.r2.2HG0178910	- && Q7XSV4.1 RecName: Full=Tubby-like F-box protein 7; Short=OsTLP7; AltName: Full=Tubby-like F-box protein 3; Short=OsTLP3 && PF00646:F-box domain|PF01167:Tub family	Tub	ID=HORVU.MOREX.r2.2HG0178910.1;Parent=HORVU.MOREX.r2.2HG0178910;description=Tubby-like F-box protein;ahrdqual=***;Ontology_term=GO:0009620;primary_confidence_class=HC;secondary_condidence_class=HC1

## Sheet: Cis_oe_D_down (90)
ID	Gene description	TF family	GO term
HORVU.MOREX.r2.1HG0032360	- && - && PF13855:Leucine rich repeat	-	ID=HORVU.MOREX.r2.1HG0032360.1;Parent=HORVU.MOREX.r2.1HG0032360;description=Leucine-rich repeat receptor-like protein kinase family protein;ahrdqual=*-*;Ontology_term=GO:0003677;primary_confidence_class=HC;secondary_condidence_class=HC1
HORVU.MOREX.r2.5HG0381840	- && - && PF04970:Lecithin retinol acyltransferase	-	ID=HORVU.MOREX.r2.5HG0381840.1;Parent=HORVU.MOREX.r2.5HG0381840;description=NC domain-containing family protein;ahrdqual=***;Ontology_term=GO:0003676,GO:0008270,GO:0015074;primary_confidence_class=HC;secondary_condidence_class=HC2
HORVU.MOREX.r2.5HG0406490	- && Q9LPS9.1 RecName: Full=Pirin-like protein At1g50590 && PF02678:Pirin|PF05726:Pirin C-terminal cupin domain	-	ID=HORVU.MOREX.r2.5HG0406490.1;Parent=HORVU.MOREX.r2.5HG0406490;description=Pirin-like protein;ahrdqual=***;Ontology_term=GO:0005739,GO:0008137,GO:0016020,GO:0016021,GO:0016491,GO:0055114;primary_confidence_class=HC;secondary_condidence_class=HC1
HORVU.MOREX.r2.2HG0162580	- && Q7XI14.1 RecName: Full=Probable D-2-hydroxyglutarate dehydrogenase, mitochondrial; Flags: Precursor && PF01565:FAD binding domain|PF02913:FAD linked oxidases, C-terminal domain	FAD_binding_4	ID=HORVU.MOREX.r2.2HG0162580.1;Parent=HORVU.MOREX.r2.2HG0162580;description=D-2-hydroxyglutarate dehydrogenase;ahrdqual=***;Ontology_term=GO:0003824,GO:0016491,GO:0016614,GO:0050660,GO:0055114;primary_confidence_class=HC;secondary_condidence_class=HC1
HORVU.MOREX.r2.5HG0356920	- && - && PF00595:PDZ domain (Also known as DHR or GLGF)|PF13365:Trypsin-like peptidase domain	PDZ	ID=HORVU.MOREX.r2.5HG0356920.1;Parent=HORVU.MOREX.r2.5HG0356920;description=Serine protease HtrA-like;ahrdqual=*-*;Ontology_term=GO:0004252,GO:0005886,GO:0006508,GO:0008233,GO:0008236,GO:0016020,GO:0016021,GO:0016787;primary_confidence_class=HC;secondary_condidence_class=HC2
HORVU.MOREX.r2.6HG0525000	- && - && PF00501:AMP-binding enzyme	AMP-binding	ID=HORVU.MOREX.r2.6HG0525000.1;Parent=HORVU.MOREX.r2.6HG0525000;description=4-coumarate-CoA ligase-like protein;ahrdqual=***;Ontology_term=GO:0003824,GO:0008152,GO:0016874;primary_confidence_class=HC;secondary_condidence_class=HC2
HORVU.MOREX.r2.5HG0407520	- && Q8GYX8.2 RecName: Full=Chaperone protein dnaJ 10; Short=AtDjC10; Short=AtJ10 && PF14308:X-domain of DnaJ-containing|PF00226:DnaJ domain	DnaJ	ID=HORVU.MOREX.r2.5HG0407520.1;Parent=HORVU.MOREX.r2.5HG0407520;description=Chaperone protein dnaJ, putative;ahrdqual=***;Ontology_term=GO:0003677,GO:0005634,GO:0008270;primary_confidence_class=HC;secondary_condidence_class=HC1
HORVU.MOREX.r2.3HG0261930	- && Q84J88.1 RecName: Full=Heavy metal-associated isoprenylated plant protein 36; Short=AtHIP36; Flags: Precursor && PF00403:Heavy-metal-associated domain	HMA	ID=HORVU.MOREX.r2.3HG0261930.1;Parent=HORVU.MOREX.r2.3HG0261930;description=Heavy metal transport/detoxification superfamily protein, putative;ahrdqual=*-*;Ontology_term=GO:0030001,GO:0046872;primary_confidence_class=HC;secondary_condidence_class=HC2
HORVU.MOREX.r2.2HG0129010	- && Q9SY14.1 RecName: Full=CSC1-like protein At4g02900 && PF02714:Calcium-dependent channel, 7TM region, putative phosphate|PF13967:Late exocytosis, associated with Golgi transport|PF14703:Cytosolic domain of 10TM putative phosphate transporter	-	ID=HORVU.MOREX.r2.2HG0129010.1;Parent=HORVU.MOREX.r2.2HG0129010;description=ERD (Early-responsive to dehydration stress) family protein;ahrdqual=***;Ontology_term=GO:0016020,GO:0016021;primary_confidence_class=HC;secondary_condidence_class=HC1
HORVU.MOREX.r2.6HG0506450	- && Q501H5.1 RecName: Full=Phosphatidylinositol/phosphatidylcholine transfer protein SFH13; AltName: Full=Protein SEC FOURTEEN HOMOLOGS 13; Short=AtSFH13 && PF03765:CRAL/TRIO, N-terminal domain|PF00650:CRAL/TRIO domain	CRAL_TRIO_N	ID=HORVU.MOREX.r2.6HG0506450.1;Parent=HORVU.MOREX.r2.6HG0506450;description=Sec14p-like phosphatidylinositol transfer family protein;ahrdqual=***;Ontology_term=GO:0016020,GO:0016021;primary_confidence_class=HC;secondary_condidence_class=HC1
HORVU.MOREX.r2.5HG0421620	- && - && PF13365:Trypsin-like peptidase domain	-	ID=HORVU.MOREX.r2.5HG0421620.1;Parent=HORVU.MOREX.r2.5HG0421620;description=Superoxide dismutase [Cu-Zn];ahrdqual=*-*;Ontology_term=GO:0004784,GO:0006801,GO:0016491,GO:0019430,GO:0046872,GO:0055114;primary_confidence_class=HC;secondary_condidence_class=HC2
HORVU.MOREX.r2.6HG0508760	- && Q9LX07.1 RecName: Full=Annexin D7; AltName: Full=AnnAt7 && PF00191:Annexin	-	ID=HORVU.MOREX.r2.6HG0508760.1;Parent=HORVU.MOREX.r2.6HG0508760;description=Annexin;ahrdqual=***;Ontology_term=GO:0000049,GO:0003723,GO:0005634,GO:0006400,GO:0008033,GO:0008168,GO:0008176,GO:0016740,GO:0032259,GO:0106004;primary_confidence_class=HC;secondary_condidence_class=HC1
HORVU.MOREX.r2.4HG0294250	- && O22925.1 RecName: Full=Vacuolar-sorting receptor 2; Short=AtVSR2; AltName: Full=BP80-like protein c; Short=AtBP80c; AltName: Full=Epidermal growth factor receptor-like protein 4; Short=AtELP4; Flags: Precursor && PF02225:PA domain	-	ID=HORVU.MOREX.r2.4HG0294250.1;Parent=HORVU.MOREX.r2.4HG0294250;description=Vacuolar sorting receptor family protein;ahrdqual=***;Ontology_term=GO:0005509,GO:0016020,GO:0016021;primary_confidence_class=HC;secondary_condidence_class=HC1
HORVU.MOREX.r2.5HG0439540	- && - && PF00646:F-box domain	F-box	ID=HORVU.MOREX.r2.5HG0439540.1;Parent=HORVU.MOREX.r2.5HG0439540;description=F-box family protein;ahrdqual=--*;Ontology_term=GO:0005215,GO:0016020,GO:0016021;primary_confidence_class=HC;secondary_condidence_class=HC2
HORVU.MOREX.r2.3HG0256690	- && Q39134.2 RecName: Full=Amino acid permease 3; AltName: Full=Amino acid transporter AAP3 && PF01490:Transmembrane amino acid transporter protein	Aa_trans	ID=HORVU.MOREX.r2.3HG0256690.1;Parent=HORVU.MOREX.r2.3HG0256690;description=Amino acid permease;ahrdqual=***;Ontology_term=GO:0016020,GO:0016021;primary_confidence_class=HC;secondary_condidence_class=HC1
HORVU.MOREX.r2.6HG0506960	- && Q9CAA7.1 RecName: Full=Putative U-box domain-containing protein 42; AltName: Full=Plant U-box protein 42 && PF04564:U-box domain	U-box	ID=HORVU.MOREX.r2.6HG0506960.1;Parent=HORVU.MOREX.r2.6HG0506960;description=U box domain-containing protein;ahrdqual=*-*;Ontology_term=GO:0004842,GO:0016567;primary_confidence_class=HC;secondary_condidence_class=HC1
HORVU.MOREX.r2.3HG0186320	- && Q9LIN2.1 RecName: Full=GDSL esterase/lipase At3g26430; AltName: Full=Extracellular lipase At3g26430; Flags: Precursor && PF00657:GDSL-like Lipase/Acylhydrolase	Lipase_GDSL	ID=HORVU.MOREX.r2.3HG0186320.1;Parent=HORVU.MOREX.r2.3HG0186320;description=GDSL esterase/lipase;ahrdqual=***;Ontology_term=GO:0016788;primary_confidence_class=HC;secondary_condidence_class=HC1
HORVU.MOREX.r2.5HG0441050	- && Q9MA55.1 RecName: Full=Acyl-CoA-binding domain-containing protein 4; Short=Acyl-CoA binding protein 4 && PF13415:Galactose oxidase, central domain|PF01344:Kelch motif|PF00887:Acyl CoA binding protein	Kelch_1	ID=HORVU.MOREX.r2.5HG0441050.1;Parent=HORVU.MOREX.r2.5HG0441050;description=Acyl-CoA-binding domain-containing protein 4;ahrdqual=***;Ontology_term=GO:0000062;primary_confidence_class=HC;secondary_condidence_class=HC1
HORVU.MOREX.r2.1HG0063760	- && Q8RXD4.1 RecName: Full=Protein BREAST CANCER SUSCEPTIBILITY 1 homolog; Short=AtBRCA1 && PF13920:Zinc finger, C3HC4 type (RING finger)|PF00533:BRCA1 C Terminus (BRCT) domain|PF13771:PHD-like zinc-binding domain	BRCT	ID=HORVU.MOREX.r2.1HG0063760.1;Parent=HORVU.MOREX.r2.1HG0063760;description=breast cancer associated RING 1;ahrdqual=*-*;Ontology_term=GO:0009507,GO:0009523,GO:0015979,GO:0016020,GO:0016021;primary_confidence_class=HC;secondary_condidence_class=HC2
HORVU.MOREX.r2.2HG0147250	- && Q7Y1Z0.1 RecName: Full=Chitinase 5; AltName: Full=Class IV chitinase a; Short=OsChia4a; AltName: Full=Pathogenesis related (PR)-3 chitinase 5; Flags: Precursor && PF00182:Chitinase class I|PF00187:Chitin recognition protein	-	ID=HORVU.MOREX.r2.2HG0147250.1;Parent=HORVU.MOREX.r2.2HG0147250;description=Chitinase;ahrdqual=***;Ontology_term=GO:0004568,GO:0005975,GO:0006032,GO:0008061,GO:0016998;primary_confidence_class=HC;secondary_condidence_class=HC1
HORVU.MOREX.r2.6HG0460850	- && O81970.1 RecName: Full=Cytochrome P450 71A9; AltName: Full=Cytochrome P450 CP1 && PF00067:Cytochrome P450	p450	ID=HORVU.MOREX.r2.6HG0460850.1;Parent=HORVU.MOREX.r2.6HG0460850;description=Cytochrome P450 family protein, expressed;ahrdqual=***;Ontology_term=GO:0004497,GO:0005506,GO:0016491,GO:0016705,GO:0020037,GO:0046872,GO:0055114;primary_confidence_class=HC;secondary_condidence_class=HC1
HORVU.MOREX.r2.5HG0387970	- && - && -	-	ID=HORVU.MOREX.r2.5HG0387970.1;Parent=HORVU.MOREX.r2.5HG0387970;description=Leucine-rich repeat receptor-like protein kinase;ahrdqual=*-*;Ontology_term=GO:0004672,GO:0005524,GO:0006468,GO:0016020,GO:0016021,GO:0016301,GO:0016310;primary_confidence_class=HC;secondary_condidence_class=HC2
HORVU.MOREX.r2.3HG0193480	- && O22255.1 RecName: Full=RING-H2 finger protein ATL64; AltName: Full=RING-type E3 ubiquitin transferase ATL64 && PF13639:Ring finger domain	-	ID=HORVU.MOREX.r2.3HG0193480.1;Parent=HORVU.MOREX.r2.3HG0193480;description=Ring finger protein, putative;ahrdqual=*-*;Ontology_term=GO:0016020,GO:0016021;primary_confidence_class=HC;secondary_condidence_class=HC2
HORVU.MOREX.r2.6HG0464420	- && Q9FWX7.1 RecName: Full=ABC transporter B family member 11; Short=ABC transporter ABCB.11; Short=AtABCB11; AltName: Full=Multidrug resistance protein 8; AltName: Full=P-glycoprotein 11 && PF07673:Protein of unknown function (DUF1602)|PF00664:ABC trans	ABC_membrane	ID=HORVU.MOREX.r2.6HG0464420.1;Parent=HORVU.MOREX.r2.6HG0464420;description=ABC transporter B family protein;ahrdqual=***;Ontology_term=GO:0000166,GO:0005524,GO:0016020,GO:0016021,GO:0016887,GO:0042626,GO:0055085;primary_confidence_class=HC;secondary_condidence_class=HC1
HORVU.MOREX.r2.2HG0079040	- && Q7G764.1 RecName: Full=Probable NAD(P)H-dependent oxidoreductase 1 && PF00248:Aldo/keto reductase family	Aldo_ket_red	ID=HORVU.MOREX.r2.2HG0079040.1;Parent=HORVU.MOREX.r2.2HG0079040;description=Reductase 1;ahrdqual=***;Ontology_term=GO:0016491,GO:0055114;primary_confidence_class=HC;secondary_condidence_class=HC1
HORVU.MOREX.r2.2HG0148770	- && Q9SD53.1 RecName: Full=UPF0481 protein At3g47200 && PF03140:Plant protein of unknown function	-	ID=HORVU.MOREX.r2.2HG0148770.1;Parent=HORVU.MOREX.r2.2HG0148770;description=transmembrane protein, putative (DUF247);ahrdqual=***;Ontology_term=GO:0000166,GO:0004672,GO:0004674,GO:0005524,GO:0006468,GO:0016020,GO:0016021,GO:0016301,GO:0016310,GO:0016491,GO:0016740,GO:0032440,GO:0055114;primary_confidence_class=HC;secondary_condidence_class=HC1
HORVU.MOREX.r2.7HG0598650	- && Q6ZCR3.1 RecName: Full=Germin-like protein 8-12; Flags: Precursor && PF00190:Cupin	-	ID=HORVU.MOREX.r2.7HG0598650.1;Parent=HORVU.MOREX.r2.7HG0598650;description=Germin-like protein;ahrdqual=***;Ontology_term=GO:0005576,GO:0030145,GO:0045735,GO:0046872;primary_confidence_class=HC;secondary_condidence_class=HC1
HORVU.MOREX.r2.1HG0039310	- && Q9SGU9.1 RecName: Full=Methionine gamma-lyase; Short=AtMGL; AltName: Full=L-methioninase && PF01053:Cys/Met metabolism PLP-dependent enzyme	Cys_Met_Meta_PP	ID=HORVU.MOREX.r2.1HG0039310.1;Parent=HORVU.MOREX.r2.1HG0039310;description=Cystathionine gamma-lyase;ahrdqual=***;Ontology_term=GO:0003824,GO:0016829,GO:0030170;primary_confidence_class=HC;secondary_condidence_class=HC1
HORVU.MOREX.r2.4HG0322360	- && Q9SYM5.1 RecName: Full=Trifunctional UDP-glucose 4,6-dehydratase/UDP-4-keto-6-deoxy-D-glucose 3,5-epimerase/UDP-4-keto-L-rhamnose-reductase RHM1; AltName: Full=Protein REPRESSOR OF LRX1 1; AltName: Full=Rhamnose biosynthetic enzyme 1; Short=AtRHM1; I	-	ID=HORVU.MOREX.r2.4HG0322360.1;Parent=HORVU.MOREX.r2.4HG0322360;description=Udp-glucose 4,6-dehydratase;ahrdqual=***;Ontology_term=GO:0016829,GO:0050377;primary_confidence_class=HC;secondary_condidence_class=HC1
HORVU.MOREX.r2.2HG0116600	- && Q69RC4.1 RecName: Full=Autophagy-related protein 8A; AltName: Full=Autophagy-related ubiquitin-like modifier ATG8A; Flags: Precursor >Q2XPP5.1 RecName: Full=Autophagy-related protein 8A; AltName: Full=Autophagy-related ubiquitin-like modifier ATG8A;	-	ID=HORVU.MOREX.r2.2HG0116600.1;Parent=HORVU.MOREX.r2.2HG0116600;description=Autophagy-related protein;ahrdqual=***;Ontology_term=GO:0006914;primary_confidence_class=HC;secondary_condidence_class=HC1
HORVU.MOREX.r2.3HG0195630	- && O80939.1 RecName: Full=L-type lectin-domain containing receptor kinase IV.1; Short=Arabidopsis thaliana lectin-receptor kinase e; Short=AthlecRK-e; Short=LecRK-IV.1; AltName: Full=Lectin Receptor Kinase 1; Flags: Precursor && PF00139:Legume lectin do	Pkinase	ID=HORVU.MOREX.r2.3HG0195630.1;Parent=HORVU.MOREX.r2.3HG0195630;description=Lectin receptor kinase;ahrdqual=***;Ontology_term=GO:0004672,GO:0005524,GO:0006468,GO:0016020,GO:0016021,GO:0016301,GO:0016310,GO:0030246;primary_confidence_class=HC;secondary_condidence_class=HC1
HORVU.MOREX.r2.4HG0318780	- && Q895K2.1 RecName: Full=DNA polymerase III PolC-type; Short=PolIII && PF00929:Exonuclease	Exonuc_X-T	ID=HORVU.MOREX.r2.4HG0318780.1;Parent=HORVU.MOREX.r2.4HG0318780;description=DNA polymerase III polC-type;ahrdqual=***;Ontology_term=GO:0003676;primary_confidence_class=HC;secondary_condidence_class=HC2
HORVU.MOREX.r2.6HG0466080	- && - && PF13855:Leucine rich repeat|PF08263:Leucine rich repeat N-terminal domain	LRRNT_2	ID=HORVU.MOREX.r2.6HG0466080.1;Parent=HORVU.MOREX.r2.6HG0466080;description=Leucine-rich repeat receptor-like protein kinase family protein;ahrdqual=***;Ontology_term=GO:0003723,GO:0003743,GO:0006413;primary_confidence_class=HC;secondary_condidence_class=HC1
HORVU.MOREX.r2.6HG0509510	- && Q6MEW4.1 RecName: Full=2,3-bisphosphoglycerate-dependent phosphoglycerate mutase; Short=BPG-dependent PGAM; Short=PGAM; Short=Phosphoglyceromutase; Short=dPGM && PF00300:Histidine phosphatase superfamily (branch 1)	-	ID=HORVU.MOREX.r2.6HG0509510.1;Parent=HORVU.MOREX.r2.6HG0509510;description=2,3-bisphosphoglycerate-dependent phosphoglycerate mutase;ahrdqual=***;Ontology_term=GO:0003824,GO:0004619,GO:0006096,GO:0008152,GO:0016868;primary_confidence_class=HC;secondary_condidence_class=HC2
HORVU.MOREX.r2.1HG0041900	- && - && PF03127:GAT domain|PF00790:VHS domain	-	ID=HORVU.MOREX.r2.1HG0041900.1;Parent=HORVU.MOREX.r2.1HG0041900;description=TOM1-like protein 2;ahrdqual=***;Ontology_term=GO:0005622,GO:0006886;primary_confidence_class=HC;secondary_condidence_class=HC2
HORVU.MOREX.r2.6HG0517380	- && Q8L831.1 RecName: Full=Nudix hydrolase 3; Short=AtNUDT3 && PF00293:NUDIX domain|PF03571:Peptidase family M49	NUDIX	ID=HORVU.MOREX.r2.6HG0517380.1;Parent=HORVU.MOREX.r2.6HG0517380;description=Isopentenyl-diphosphate delta-isomerase;ahrdqual=*-*;Ontology_term=GO:0004452,GO:0008299,GO:0016787,GO:0016853;primary_confidence_class=HC;secondary_condidence_class=HC1
HORVU.MOREX.r2.3HG0244870	- && Q8GUL1.1 RecName: Full=Autophagy-related protein 18g; Short=AtATG18g && PF12490:Breast carcinoma amplified sequence 3	-	ID=HORVU.MOREX.r2.3HG0244870.1;Parent=HORVU.MOREX.r2.3HG0244870;description=Breast carcinoma-amplified sequence 3-like protein;ahrdqual=***;Ontology_term=GO:0042594;primary_confidence_class=HC;secondary_condidence_class=HC1
HORVU.MOREX.r2.7HG0555100	- && - && -	-	ID=HORVU.MOREX.r2.7HG0555100.1;Parent=HORVU.MOREX.r2.7HG0555100;description=phosphatidic acid phosphohydrolase 2;ahrdqual=--*;Ontology_term=GO:0003950;primary_confidence_class=HC;secondary_condidence_class=HC2
HORVU.MOREX.r2.3HG0234750	- && F4IHJ0.1 RecName: Full=Phosphatidylinositol/phosphatidylcholine transfer protein SFH8; AltName: Full=Protein SEC FOURTEEN HOMOLOGS 8; Short=AtSFH8 && PF03765:CRAL/TRIO, N-terminal domain|PF00650:CRAL/TRIO domain	CRAL_TRIO_N	ID=HORVU.MOREX.r2.3HG0234750.1;Parent=HORVU.MOREX.r2.3HG0234750;description=Sec14p-like phosphatidylinositol transfer family protein;ahrdqual=***;Ontology_term=GO:0016020,GO:0016021;primary_confidence_class=HC;secondary_condidence_class=HC1
HORVU.MOREX.r2.3HG0235440	- && Q9SD62.1 RecName: Full=Putative receptor-like protein kinase At3g47110; Flags: Precursor && PF13855:Leucine rich repeat|PF00069:Protein kinase domain	Pkinase	ID=HORVU.MOREX.r2.3HG0235440.1;Parent=HORVU.MOREX.r2.3HG0235440;description=Kinase;ahrdqual=***;Ontology_term=GO:0000166,GO:0004672,GO:0004674,GO:0005524,GO:0006468,GO:0016020,GO:0016021,GO:0016301,GO:0016310,GO:0016740;primary_confidence_class=HC;secondary_condidence_class=HC2
HORVU.MOREX.r2.1HG0067180	- && - && PF04520:Senescence regulator	-	ID=HORVU.MOREX.r2.1HG0067180.1;Parent=HORVU.MOREX.r2.1HG0067180;description=senescence regulator (Protein of unknown function, DUF584)/S40;ahrdqual=***;Ontology_term=GO:0005743,GO:0006839,GO:0016020,GO:0016021,GO:0022857,GO:0055085;primary_confidence_class=HC;secondary_condidence_class=HC2
HORVU.MOREX.r2.4HG0328580	- && Q42831.1 RecName: Full=Non-symbiotic hemoglobin; AltName: Full=HORvu GLB1; AltName: Full=Non-legume hemoglobin && PF00042:Globin	-	ID=HORVU.MOREX.r2.4HG0328580.1;Parent=HORVU.MOREX.r2.4HG0328580;description=Non-symbiotic hemoglobin;ahrdqual=***;Ontology_term=GO:0005344,GO:0015671,GO:0019825,GO:0020037,GO:0046872;primary_confidence_class=HC;secondary_condidence_class=HC1
HORVU.MOREX.r2.2HG0181070	- && C0LGP4.1 RecName: Full=Probable LRR receptor-like serine/threonine-protein kinase At3g47570; Flags: Precursor && PF13855:Leucine rich repeat|PF07714:Protein tyrosine kinase	Pkinase_Tyr	ID=HORVU.MOREX.r2.2HG0181070.1;Parent=HORVU.MOREX.r2.2HG0181070;description=Receptor kinase;ahrdqual=***;Ontology_term=GO:0000166,GO:0004672,GO:0004674,GO:0005524,GO:0006468,GO:0016020,GO:0016021,GO:0016301,GO:0016310,GO:0016740;primary_confidence_class=HC;secondary_condidence_class=HC1
HORVU.MOREX.r2.7HG0619320	- && Q9LNJ3.1 RecName: Full=Aspartyl protease family protein 2; Flags: Precursor && PF14543:Xylanase inhibitor N-terminal|PF14541:Xylanase inhibitor C-terminal	-	ID=HORVU.MOREX.r2.7HG0619320.1;Parent=HORVU.MOREX.r2.7HG0619320;description=Eukaryotic aspartyl protease family protein;ahrdqual=***;Ontology_term=GO:0004190,GO:0006508,GO:0008233,GO:0016787;primary_confidence_class=HC;secondary_condidence_class=HC1
HORVU.MOREX.r2.1HG0067240	- && Q93VB5.1 RecName: Full=Heat stress transcription factor A-4d; AltName: Full=Heat stress transcription factor 10; Short=rHsf10; AltName: Full=Heat stress transcription factor 15; Short=OsHsf-15; AltName: Full=Protein SPOTTED LEAF 7 && PF00447:HSF-type	HSF_DNA-bind	ID=HORVU.MOREX.r2.1HG0067240.1;Parent=HORVU.MOREX.r2.1HG0067240;description=Heat shock transcription factor;ahrdqual=***;Ontology_term=GO:0003677,GO:0003700,GO:0005634,GO:0006355,GO:0043565;primary_confidence_class=HC;secondary_condidence_class=HC1
HORVU.MOREX.r2.5HG0391810	- && Q9LXT4.1 RecName: Full=Plant cysteine oxidase 5 && PF07847:Protein of unknown function (DUF1637)	-	ID=HORVU.MOREX.r2.5HG0391810.1;Parent=HORVU.MOREX.r2.5HG0391810;description=2-aminoethanethiol dioxygenase;ahrdqual=***;Ontology_term=GO:0016702,GO:0051213,GO:0055114;primary_confidence_class=HC;secondary_condidence_class=HC1
HORVU.MOREX.r2.7HG0614180	- && Q67W82.1 RecName: Full=Probable 4-coumarate--CoA ligase 4; Short=4CL 4; Short=Os4CL4; AltName: Full=4-coumaroyl-CoA synthase 4 && PF00501:AMP-binding enzyme|PF13193:AMP-binding enzyme C-terminal domain	AMP-binding	ID=HORVU.MOREX.r2.7HG0614180.1;Parent=HORVU.MOREX.r2.7HG0614180;description=4-coumarate:CoA ligase;ahrdqual=***;Ontology_term=GO:0003824,GO:0008152,GO:0016874;primary_confidence_class=HC;secondary_condidence_class=HC1
HORVU.MOREX.r2.2HG0161460	- && P43309.1 RecName: Full=Polyphenol oxidase, chloroplastic; Short=PPO; AltName: Full=Catechol oxidase; Flags: Precursor && PF12143:Protein of unknown function (DUF_B2219)|PF12142:Polyphenol oxidase middle domain|PF00264:Common central domain of tyrosin	-	ID=HORVU.MOREX.r2.2HG0161460.1;Parent=HORVU.MOREX.r2.2HG0161460;description=Polyphenol oxidase;ahrdqual=***;Ontology_term=GO:0004097,GO:0008152,GO:0016491,GO:0046148,GO:0046872,GO:0055114;primary_confidence_class=HC;secondary_condidence_class=HC1
HORVU.MOREX.r2.7HG0604890	- && Q8RXT9.2 RecName: Full=GDSL esterase/lipase At1g28590; AltName: Full=Extracellular lipase At1g28590; Flags: Precursor && PF00657:GDSL-like Lipase/Acylhydrolase	Lipase_GDSL	ID=HORVU.MOREX.r2.7HG0604890.1;Parent=HORVU.MOREX.r2.7HG0604890;description=GDSL esterase/lipase;ahrdqual=***;Ontology_term=GO:0016788;primary_confidence_class=HC;secondary_condidence_class=HC1
HORVU.MOREX.r2.3HG0187510	- && - && PF13962:Domain of unknown function|PF12796:Ankyrin repeats (3 copies)	-	ID=HORVU.MOREX.r2.3HG0187510.1;Parent=HORVU.MOREX.r2.3HG0187510;description=Ankyrin repeat family protein-like;ahrdqual=***;Ontology_term=GO:0007165,GO:0016020,GO:0016021;primary_confidence_class=HC;secondary_condidence_class=HC2
HORVU.MOREX.r2.2HG0079820	- && Q9FYA2.1 RecName: Full=Probable WRKY transcription factor 75; AltName: Full=WRKY DNA-binding protein 75 && PF03106:WRKY DNA -binding domain	WRKY	ID=HORVU.MOREX.r2.2HG0079820.1;Parent=HORVU.MOREX.r2.2HG0079820;description=WRKY transcription factor;ahrdqual=***;Ontology_term=GO:0003677,GO:0003700,GO:0005634,GO:0006351,GO:0006355,GO:0043565;primary_confidence_class=HC;secondary_condidence_class=HC2
HORVU.MOREX.r2.6HG0505150	- && Q9ASU1.1 RecName: Full=Diacylglycerol O-acyltransferase 2 && PF03982:Diacylglycerol acyltransferase	-	ID=HORVU.MOREX.r2.6HG0505150.1;Parent=HORVU.MOREX.r2.6HG0505150;description=Diacylglycerol O-acyltransferase 2;ahrdqual=***;Ontology_term=GO:0016740,GO:0016746,GO:0016747;primary_confidence_class=HC;secondary_condidence_class=HC1
HORVU.MOREX.r2.7HG0592010	- && P17801.2 RecName: Full=Putative receptor protein kinase ZmPK1; Flags: Precursor && PF01453:D-mannose binding lectin|PF00069:Protein kinase domain|PF00954:S-locus glycoprotein domain	Pkinase	ID=HORVU.MOREX.r2.7HG0592010.1;Parent=HORVU.MOREX.r2.7HG0592010;description=Serine/threonine-protein kinase;ahrdqual=***;Ontology_term=GO:0000166,GO:0004672,GO:0004674,GO:0005524,GO:0006468,GO:0016020,GO:0016021,GO:0016301,GO:0016310,GO:0016740,GO:0048544;primary_confidence_class=HC;secondary_condidence_class=HC1
HORVU.MOREX.r2.3HG0224000	- && Q8VZG2.1 RecName: Full=Protein HYPER-SENSITIVITY-RELATED 4; Short=AtHSR4; AltName: Full=BCS1-like protein && PF14363:Domain associated at C-terminal with AAA|PF00004:ATPase family associated with various cellular activities (AAA)	AAA	ID=HORVU.MOREX.r2.3HG0224000.1;Parent=HORVU.MOREX.r2.3HG0224000;description=ATP-dependent zinc metalloprotease FtsH;ahrdqual=*-*;Ontology_term=GO:0000166,GO:0004222,GO:0005524,GO:0005886,GO:0006508,GO:0008233,GO:0008237,GO:0016020,GO:0016021,GO:0016787,GO:0046872;primary_confidence_class=HC;secondary_condidence_class=HC1
HORVU.MOREX.r2.4HG0337930	- && Q10QS9.1 RecName: Full=B3 domain-containing protein Os03g0184500 && PF02362:B3 DNA binding domain	B3	ID=HORVU.MOREX.r2.4HG0337930.1;Parent=HORVU.MOREX.r2.4HG0337930;description=B3 domain-containing protein;ahrdqual=***;Ontology_term=GO:0003677,GO:0005634,GO:0006351,GO:0006355;primary_confidence_class=HC;secondary_condidence_class=HC1
HORVU.MOREX.r2.7HG0598660	- && Q6ZCR3.1 RecName: Full=Germin-like protein 8-12; Flags: Precursor && PF00190:Cupin	-	ID=HORVU.MOREX.r2.7HG0598660.1;Parent=HORVU.MOREX.r2.7HG0598660;description=Germin-like protein;ahrdqual=***;Ontology_term=GO:0005576,GO:0030145,GO:0045735,GO:0046872;primary_confidence_class=HC;secondary_condidence_class=HC1
HORVU.MOREX.r2.3HG0265650	- && Q9XIC7.1 RecName: Full=Somatic embryogenesis receptor kinase 2; Short=AtSERK2; AltName: Full=Somatic embryogenesis receptor-like kinase 2; Flags: Precursor && PF08263:Leucine rich repeat N-terminal domain	LRRNT_2	ID=HORVU.MOREX.r2.3HG0265650.1;Parent=HORVU.MOREX.r2.3HG0265650;description=Leucine-rich repeat receptor-like kinase;ahrdqual=*-*;Ontology_term=GO:0000166,GO:0004672,GO:0004674,GO:0005102,GO:0005524,GO:0005739,GO:0006468,GO:0007165,GO:0016020,GO:0016021,GO:0016301,GO:0016310,GO:0016740;primary_confidence_class=HC;secondary_condidence_class=HC2
HORVU.MOREX.r2.7HG0593040	- && - && -	-	ID=HORVU.MOREX.r2.7HG0593040.1;Parent=HORVU.MOREX.r2.7HG0593040;description=Cysteine/Histidine-rich C1 domain family protein;ahrdqual=***;Ontology_term=GO:0005622,GO:0016020,GO:0016021,GO:0035556;primary_confidence_class=HC;secondary_condidence_class=HC2
HORVU.MOREX.r2.7HG0587680	- && - && PF00139:Legume lectin domain	-	ID=HORVU.MOREX.r2.7HG0587680.1;Parent=HORVU.MOREX.r2.7HG0587680;description=Lectin-like protein kinase;ahrdqual=*-*;Ontology_term=GO:0004672,GO:0005524,GO:0006468,GO:0016020,GO:0016021,GO:0016301,GO:0016310,GO:0030246;primary_confidence_class=HC;secondary_condidence_class=HC2
HORVU.MOREX.r2.1HG0005640	- && Q8BL95.1 RecName: Full=UPF0769 protein C21orf59 homolog && PF11069:Protein of unknown function (DUF2870)	-	ID=HORVU.MOREX.r2.1HG0005640.1;Parent=HORVU.MOREX.r2.1HG0005640;description=heat shock protein 70;ahrdqual=--*;Ontology_term=GO:0003964,GO:0006278,GO:0016787;primary_confidence_class=HC;secondary_condidence_class=HC2
HORVU.MOREX.r2.2HG0110070	- && Q7XTF8.1 RecName: Full=Copper transporter 6; Short=OsCOPT6 && PF04145:Ctr copper transporter family	-	ID=HORVU.MOREX.r2.2HG0110070.1;Parent=HORVU.MOREX.r2.2HG0110070;description=Copper transporter, putative;ahrdqual=***;Ontology_term=GO:0005375,GO:0016020,GO:0016021,GO:0035434;primary_confidence_class=HC;secondary_condidence_class=HC1
HORVU.MOREX.r2.4HG0321810	- && - && PF13398:Peptidase M50B-like	-	ID=HORVU.MOREX.r2.4HG0321810.1;Parent=HORVU.MOREX.r2.4HG0321810;description=Peptidase M50B-like protein;ahrdqual=***;Ontology_term=GO:0016020,GO:0016021;primary_confidence_class=HC;secondary_condidence_class=HC2
HORVU.MOREX.r2.4HG0342850	- && Q9FNL7.1 RecName: Full=Protein NRT1/ PTR FAMILY 5.2; Short=AtNPF5.2; AltName: Full=Peptide transporter PTR3-A; Short=AtPTR3 && PF00854:POT family	-	ID=HORVU.MOREX.r2.4HG0342850.1;Parent=HORVU.MOREX.r2.4HG0342850;description=Peptide transporter;ahrdqual=***;Ontology_term=GO:0016020,GO:0016021,GO:0022857,GO:0055085;primary_confidence_class=HC;secondary_condidence_class=HC1
HORVU.MOREX.r2.6HG0471860	- && P0DKJ4.1 RecName: Full=Bidirectional sugar transporter SWEET2a; Short=SbSWEET2a && PF03083:Sugar efflux transporter for intercellular exchange	-	ID=HORVU.MOREX.r2.6HG0471860.1;Parent=HORVU.MOREX.r2.6HG0471860;description=Bidirectional sugar transporter SWEET;ahrdqual=***;Ontology_term=GO:0008643,GO:0016020,GO:0016021;primary_confidence_class=HC;secondary_condidence_class=HC1
HORVU.MOREX.r2.3HG0240680	- && Q9XG83.1 RecName: Full=Gibberellin 2-beta-dioxygenase; AltName: Full=GA 2-oxidase; AltName: Full=Gibberellin 2-beta-hydroxylase; AltName: Full=Gibberellin 2-oxidase && PF03171:2OG-Fe(II) oxygenase superfamily|PF14226:non-haem dioxygenase in morphine	2OG-FeII_Oxy	ID=HORVU.MOREX.r2.3HG0240680.1;Parent=HORVU.MOREX.r2.3HG0240680;description=Gibberellin 2-oxidase;ahrdqual=***;Ontology_term=GO:0016491,GO:0046872,GO:0055114;primary_confidence_class=HC;secondary_condidence_class=HC1
HORVU.MOREX.r2.2HG0138670	- && - && PF02496:ABA/WDS induced protein	-	ID=HORVU.MOREX.r2.2HG0138670.1;Parent=HORVU.MOREX.r2.2HG0138670;description=Abscisic stress ripening;ahrdqual=*-*;Ontology_term=GO:0006950;primary_confidence_class=HC;secondary_condidence_class=HC2
HORVU.MOREX.r2.5HG0379640	- && Q9LZ20.1 RecName: Full=Cationic amino acid transporter 6, chloroplastic; Flags: Precursor && PF13906:C-terminus of AA_permease|PF13520:Amino acid permease	-	ID=HORVU.MOREX.r2.5HG0379640.1;Parent=HORVU.MOREX.r2.5HG0379640;description=Cationic amino acid transporter;ahrdqual=***;Ontology_term=GO:0016020,GO:0016021,GO:0022857,GO:0055085;primary_confidence_class=HC;secondary_condidence_class=HC1
HORVU.MOREX.r2.6HG0457770	- && O64477.1 RecName: Full=G-type lectin S-receptor-like serine/threonine-protein kinase At2g19130; Flags: Precursor && PF01453:D-mannose binding lectin|PF08276:PAN-like domain|PF00954:S-locus glycoprotein domain|PF00069:Protein kinase domain	Pkinase	ID=HORVU.MOREX.r2.6HG0457770.1;Parent=HORVU.MOREX.r2.6HG0457770;description=Serine/threonine-protein kinase;ahrdqual=***;Ontology_term=GO:0000166,GO:0004672,GO:0004674,GO:0005524,GO:0006468,GO:0016020,GO:0016021,GO:0016301,GO:0016310,GO:0016740,GO:0048544;primary_confidence_class=HC;secondary_condidence_class=HC1
HORVU.MOREX.r2.6HG0516710	- && P12949.1 RecName: Full=Dehydrin DHN4; AltName: Full=B18 && PF00257:Dehydrin	-	ID=HORVU.MOREX.r2.6HG0516710.1;Parent=HORVU.MOREX.r2.6HG0516710;description=Dehydrin;ahrdqual=***;Ontology_term=GO:0006950,GO:0009415;primary_confidence_class=HC;secondary_condidence_class=HC1
HORVU.MOREX.r2.5HG0427610	- && Q9FKL6.1 RecName: Full=Calmodulin-binding protein 60 B && PF07887:Calmodulin binding protein-like	-	ID=HORVU.MOREX.r2.5HG0427610.1;Parent=HORVU.MOREX.r2.5HG0427610;description=Calmodulin-binding protein, putative, expressed;ahrdqual=*-*;Ontology_term=GO:0005516,GO:0006950;primary_confidence_class=HC;secondary_condidence_class=HC2
HORVU.MOREX.r2.4HG0291950	- && - && -	-	ID=HORVU.MOREX.r2.4HG0291950.1;Parent=HORVU.MOREX.r2.4HG0291950;description=SPOC domain / Transcription elongation factor S-II protein;ahrdqual=--*;Ontology_term=GO:0003700,GO:0006355;primary_confidence_class=HC;secondary_condidence_class=HC2
HORVU.MOREX.r2.3HG0229300	- && Q5SN75.1 RecName: Full=Probable protein phosphatase 2C 8; Short=OsPP2C08 && PF00481:Protein phosphatase 2C	PP2C	ID=HORVU.MOREX.r2.3HG0229300.1;Parent=HORVU.MOREX.r2.3HG0229300;description=Protein phosphatase 2c, putative;ahrdqual=***;Ontology_term=GO:0003824,GO:0004721,GO:0004722,GO:0006470,GO:0016787,GO:0043169,GO:0046872;primary_confidence_class=HC;secondary_condidence_class=HC1
HORVU.MOREX.r2.6HG0449500	- && Q9LMN6.1 RecName: Full=Wall-associated receptor kinase 4; Flags: Precursor && PF00069:Protein kinase domain|PF13947:Wall-associated receptor kinase galacturonan-binding	Pkinase	ID=HORVU.MOREX.r2.6HG0449500.1;Parent=HORVU.MOREX.r2.6HG0449500;description=Receptor-like protein kinase;ahrdqual=*-*;Ontology_term=GO:0000166,GO:0004672,GO:0004674,GO:0005524,GO:0005576,GO:0005886,GO:0006468,GO:0016020,GO:0016021,GO:0016301,GO:0016310,GO:0016740,GO:0019199;primary_confidence_class=HC;secondary_condidence_class=HC2
HORVU.MOREX.r2.5HG0420460	- && Q653B6.1 RecName: Full=Potassium transporter 18; AltName: Full=OsHAK18 && PF02705:K+ potassium transporter	K_trans	ID=HORVU.MOREX.r2.5HG0420460.1;Parent=HORVU.MOREX.r2.5HG0420460;description=Potassium transporter;ahrdqual=***;Ontology_term=GO:0006811,GO:0006813,GO:0015079,GO:0016020,GO:0016021,GO:0071805;primary_confidence_class=HC;secondary_condidence_class=HC1
HORVU.MOREX.r2.3HG0270520	- && Q02438.2 RecName: Full=Glucan endo-1,3-beta-glucosidase GV; AltName: Full=(1->3)-beta-glucan endohydrolase GV; AltName: Full=(1->3)-beta-glucanase isoenzyme GV; AltName: Full=Beta-1,3-endoglucanase GV && PF00332:Glycosyl hydrolases family 17	Glyco_hydro_17	ID=HORVU.MOREX.r2.3HG0270520.1;Parent=HORVU.MOREX.r2.3HG0270520;description=Beta-1,3-glucanase;ahrdqual=***;Ontology_term=GO:0004553,GO:0005975,GO:0008152,GO:0016787,GO:0016798;primary_confidence_class=HC;secondary_condidence_class=HC1
HORVU.MOREX.r2.2HG0172600	- && O81905.1 RecName: Full=Receptor-like serine/threonine-protein kinase SD1-8; AltName: Full=Arabidopsis thaliana receptor kinase 3; AltName: Full=S-domain-1 (SD1) receptor kinase 8; Short=SD1-8; Flags: Precursor && PF01453:D-mannose binding lectin|PF00	Pkinase	ID=HORVU.MOREX.r2.2HG0172600.1;Parent=HORVU.MOREX.r2.2HG0172600;description=Serine/threonine-protein kinase;ahrdqual=***;Ontology_term=GO:0000166,GO:0004672,GO:0004674,GO:0005524,GO:0006468,GO:0016020,GO:0016021,GO:0016301,GO:0016310,GO:0016740,GO:0048544;primary_confidence_class=HC;secondary_condidence_class=HC1
HORVU.MOREX.r2.7HG0621840	- && B5X570.1 RecName: Full=NAC domain-containing protein 14; Short=ANAC014; AltName: Full=Protein NTM1-like 2 && PF02365:No apical meristem (NAM) protein	NAM	ID=HORVU.MOREX.r2.7HG0621840.1;Parent=HORVU.MOREX.r2.7HG0621840;description=NAC domain-containing protein, putative;ahrdqual=***;Ontology_term=GO:0003677,GO:0005634,GO:0006351,GO:0006355;primary_confidence_class=HC;secondary_condidence_class=HC2
HORVU.MOREX.r2.5HG0365020	- && Q9SZL8.1 RecName: Full=Protein FAR1-RELATED SEQUENCE 5 && PF10551:MULE transposase domain|PF03101:FAR1 DNA-binding domain|PF04434:SWIM zinc finger	FAR1	ID=HORVU.MOREX.r2.5HG0365020.1;Parent=HORVU.MOREX.r2.5HG0365020;description=Protein FAR1-RELATED SEQUENCE 5;ahrdqual=***;Ontology_term=GO:0006355,GO:0008270;primary_confidence_class=HC;secondary_condidence_class=HC1
HORVU.MOREX.r2.4HG0343390	- && Q6PHS9.1 RecName: Full=Voltage-dependent calcium channel subunit alpha-2/delta-2; AltName: Full=Protein ducky; AltName: Full=Voltage-gated calcium channel subunit alpha-2/delta-2; Contains: RecName: Full=Voltage-dependent calcium channel subunit alph	VWA	ID=HORVU.MOREX.r2.4HG0343390.1;Parent=HORVU.MOREX.r2.4HG0343390;description=Zinc finger (C3HC4-type RING finger) family protein;ahrdqual=***;Ontology_term=GO:0016788;primary_confidence_class=HC;secondary_condidence_class=HC2
HORVU.MOREX.r2.3HG0274640	- && Q9LUC5.1 RecName: Full=Cytochrome P450 72A15 && PF00067:Cytochrome P450	p450	ID=HORVU.MOREX.r2.3HG0274640.1;Parent=HORVU.MOREX.r2.3HG0274640;description=Cytochrome P450;ahrdqual=***;Ontology_term=GO:0004497,GO:0005506,GO:0016491,GO:0016705,GO:0020037,GO:0046872,GO:0055114;primary_confidence_class=HC;secondary_condidence_class=HC1
HORVU.MOREX.r2.5HG0392060	- && Q9M6E8.1 RecName: Full=9-cis-epoxycarotenoid dioxygenase NCED1, chloroplastic; AltName: Full=PvNCED1; Flags: Precursor && PF03055:Retinal pigment epithelial membrane protein	RPE65	ID=HORVU.MOREX.r2.5HG0392060.1;Parent=HORVU.MOREX.r2.5HG0392060;description=Carotenoid cleavage dioxygenase/CCD8; ahrdqual=***;Ontology_term=GO:0016702,GO:0046872,GO:0051213,GO:0055114;primary_confidence_class=HC;secondary_condidence_class=HC1
HORVU.MOREX.r2.6HG0523770	- && - && PF08263:Leucine rich repeat N-terminal domain|PF13855:Leucine rich repeat	LRRNT_2	ID=HORVU.MOREX.r2.6HG0523770.1;Parent=HORVU.MOREX.r2.6HG0523770;description=Leucine-rich repeat receptor-like protein kinase family protein;ahrdqual=***;Ontology_term=GO:0003676,GO:0003723,GO:0005198,GO:0008270,GO:0016020,GO:0016032,GO:0019012,GO:0019013,GO:0019028,GO:0020002,GO:0030430,GO:0033644,GO:0039702,GO:0042025,GO:0044174,GO:0046755,GO:0046872,GO:0055036,GO:0072494;primary_confidence_clas…
HORVU.MOREX.r2.3HG0241270	- && - && PF13962:Domain of unknown function|PF12796:Ankyrin repeats (3 copies)	-	ID=HORVU.MOREX.r2.3HG0241270.1;Parent=HORVU.MOREX.r2.3HG0241270;description=Ankyrin repeat family protein, putative, expressed;ahrdqual=***;Ontology_term=GO:0016020,GO:0016021;primary_confidence_class=HC;secondary_condidence_class=HC1
HORVU.MOREX.r2.6HG0496860	- && A2X7U1.2 RecName: Full=Homeobox-leucine zipper protein HOX24; AltName: Full=HD-ZIP protein HOX24; AltName: Full=Homeodomain transcription factor HOX24; AltName: Full=OsHox24 && PF02183:Homeobox associated leucine zipper|PF00046:Homeobox domain	Homeobox	ID=HORVU.MOREX.r2.6HG0496860.1;Parent=HORVU.MOREX.r2.6HG0496860;description=Homeobox protein, putative;ahrdqual=*-*;Ontology_term=GO:0003677,GO:0003700,GO:0005634,GO:0006355,GO:0043565;primary_confidence_class=HC;secondary_condidence_class=HC1
HORVU.MOREX.r2.4HG0344860	- && Q0WQX7.1 RecName: Full=RHOMBOID-like protein 1; Short=AtRBL1 && PF01694:Rhomboid family	Rhomboid	ID=HORVU.MOREX.r2.4HG0344860.1;Parent=HORVU.MOREX.r2.4HG0344860;description=Rhomboid-like protein;ahrdqual=***;Ontology_term=GO:0000166,GO:0004812,GO:0004817,GO:0005524,GO:0005737,GO:0006412,GO:0006418,GO:0006423,GO:0016874,GO:0046872;primary_confidence_class=HC;secondary_condidence_class=HC1
HORVU.MOREX.r2.5HG0409600	- && P14133.1 RecName: Full=L-ascorbate oxidase; Short=ASO; Short=Ascorbase; Flags: Precursor && PF00394:Multicopper oxidase|PF07731:Multicopper oxidase|PF07732:Multicopper oxidase	-	ID=HORVU.MOREX.r2.5HG0409600.1;Parent=HORVU.MOREX.r2.5HG0409600;description=Ascorbate oxidase;ahrdqual=***;Ontology_term=GO:0005507,GO:0005576,GO:0016491,GO:0046872,GO:0055114;primary_confidence_class=HC;secondary_condidence_class=HC1
HORVU.MOREX.r2.6HG0471350	- && Q9S9N9.1 RecName: Full=Cinnamoyl-CoA reductase 1; Short=AtCCR1; AltName: Full=Protein IRREGULAR XYLEM 4 && PF01370:NAD dependent epimerase/dehydratase family	Epimerase	ID=HORVU.MOREX.r2.6HG0471350.1;Parent=HORVU.MOREX.r2.6HG0471350;description=Cinnamoyl CoA reductase;ahrdqual=***;Ontology_term=GO:0003824,GO:0050662;primary_confidence_class=HC;secondary_condidence_class=HC1
HORVU.MOREX.r2.1HG0019930	- && - && -	-	ID=HORVU.MOREX.r2.1HG0019930.1;Parent=HORVU.MOREX.r2.1HG0019930;description=E3 ubiquitin-protein ligase;ahrdqual=*-*;Ontology_term=GO:0005634,GO:0006511,GO:0007275,GO:0008270,GO:0016567,GO:0046872;primary_confidence_class=HC;secondary_condidence_class=HC2
HORVU.MOREX.r2.6HG0508630	- && Q8L612.1 RecName: Full=MACPF domain-containing protein At1g14780 && PF01823:MAC/Perforin domain	-	ID=HORVU.MOREX.r2.6HG0508630.1;Parent=HORVU.MOREX.r2.6HG0508630;description=MACPF domain-containing protein;ahrdqual=***;Ontology_term=GO:0003824,GO:0004152,GO:0005737,GO:0006207,GO:0006222,GO:0016020,GO:0016491,GO:0016627,GO:0055114;primary_confidence_class=HC;secondary_condidence_class=HC1

## Sheet: DEGs_ce_up_GO
#Aspect	GO	Enrichment_log2	q-value	subset_ratio	description
BP	GO:0006264	9.42585	0.0332417	1.81818	mitochondrial DNA replication
BP	GO:0019379	9.42585	0.0332417	1.81818	sulfate assimilation, phosphoadenylyl sulfate reduction by phosphoadenylyl-sulfate reductase (thioredoxin)
BP	GO:0033258	9.42585	0.0332417	1.81818	plastid DNA metabolic process
BP	GO:0033259	9.42585	0.0332417	1.81818	plastid DNA replication
MF	GO:0004604	9.42585	0.0332417	1.81818	phosphoadenylyl-sulfate reductase (thioredoxin) activity
MF	GO:0008974	9.42585	0.0332417	1.81818	phosphoribulokinase activity
MF	GO:0009973	9.42585	0.0332417	1.81818	adenylyl-sulfate reductase activity
BP	GO:0001708	5.25592	0.0398226	3.63636	cell fate specification
CC	GO:0031977	4.24263	0.0211803	5.45455	thylakoid lumen
BP	GO:0006364	3.84089	0.0411104	5.45455	rRNA processing
BP	GO:0016072	3.7724	0.0415669	5.45455	rRNA metabolic process
BP	GO:0009965	3.71619	0.0303848	5.45455	leaf morphogenesis
BP	GO:0010016	3.24594	0.0304804	7.27273	shoot system morphogenesis
BP	GO:0009657	2.87895	0.0401484	7.27273	plastid organization
CC	GO:0009534	2.67096	0.00686738	12.7273	chloroplast thylakoid
CC	GO:0031976	2.66715	0.00620489	12.7273	plastid thylakoid
CC	GO:0044436	2.65325	0.0156976	10.9091	thylakoid part
CC	GO:0009579	2.53406	0.00472703	14.5455	thylakoid
CC	GO:0009570	2.47281	0.00105447	18.1818	chloroplast stroma
CC	GO:0009532	2.43376	0.00111067	18.1818	plastid stroma
CC	GO:0009507	2.25913	2.28646e-09	45.4545	chloroplast
CC	GO:0044434	2.21779	0.00018046	25.4545	chloroplast part
CC	GO:0009536	2.19972	2.83019e-09	45.4545	plastid
CC	GO:0044435	2.18471	0.000177527	25.4545	plastid part
CC	GO:0031984	2.05205	0.0395319	12.7273	organelle subcompartment
CC	GO:0044444	0.921878	0.00637034	50.9091	cytoplasmic part
CC	GO:0005737	0.857033	0.00917279	52.7273	cytoplasm
