# Supplementary material for: WHIRLY1 Acts Upstream of ABA-Related Reprogramming of Drought-Induced Gene Expression in Barley and Affects Stress-Related Histone Modifications
Source: Int J Mol Sci. 2023 Mar 28;24(7):6326. doi: 10.3390/ijms24076326 (PMC10094662; doi:10.3390/ijms24076326)
Supplement: Supplementary file 1 [file ijms-24-06326-s001.zip › Supplemental table S315.02.RANKING.xlsx]

## Sheet: 28_OEvsWT_D_down
Aspect	GO	Enrichment_log2	q-value	subset_ratio	description
MF	GO:0005355	4.41767	3.41545e-07	0.338983	glucose transmembrane transporter activity
BP	GO:0015755	4.41767	0.00123841	0.169492	fructose transmembrane transport
MF	GO:0005353	4.41767	0.00123841	0.169492	fructose transmembrane transporter activity
MF	GO:0034256	4.41767	0.00123841	0.169492	chlorophyll(ide) b reductase activity
CC	GO:0061908	4.41767	0.00123841	0.169492	phagophore
BP	GO:0006097	4.41767	0.0155091	0.112994	glyoxylate cycle
BP	GO:0006218	4.41767	0.0155091	0.112994	uridine catabolic process
BP	GO:1902334	4.41767	0.0155091	0.112994	fructose export from vacuole to cytoplasm
MF	GO:0001530	4.41767	0.0155091	0.112994	lipopolysaccharide binding
MF	GO:0004349	4.41767	0.0155091	0.112994	glutamate 5-kinase activity
MF	GO:0004350	4.41767	0.0155091	0.112994	glutamate-5-semialdehyde dehydrogenase activity
MF	GO:0005356	4.41767	0.0155091	0.112994	glucose:proton symporter activity
MF	GO:0008516	4.41767	0.0155091	0.112994	hexose uniporter activity
MF	GO:0009679	4.41767	0.0155091	0.112994	hexose:proton symporter activity
MF	GO:0010327	4.41767	0.0155091	0.112994	acetyl CoA:(Z)-3-hexen-1-ol acetyltransferase activity
MF	GO:0015284	4.41767	0.0155091	0.112994	fructose uniporter activity
MF	GO:0015292	4.41767	0.0155091	0.112994	uniporter activity
MF	GO:0045437	4.41767	0.0155091	0.112994	uridine nucleosidase activity
MF	GO:0050263	4.41767	0.0155091	0.112994	ribosylpyrimidine nucleosidase activity
MF	GO:0072585	4.41767	0.0155091	0.112994	xanthosine nucleotidase activity
MF	GO:0015149	4.19528	2.06572e-06	0.338983	hexose transmembrane transporter activity
MF	GO:0015183	4.00263	0.00395935	0.169492	L-aspartate transmembrane transporter activity
BP	GO:0006561	3.83271	0.000867429	0.225989	proline biosynthetic process
CC	GO:0005776	3.83271	0.000867429	0.225989	autophagosome
BP	GO:0006208	3.83271	0.0359661	0.112994	pyrimidine nucleobase catabolic process
BP	GO:0006212	3.83271	0.0359661	0.112994	uracil catabolic process
BP	GO:0033231	3.83271	0.0359661	0.112994	carbohydrate export
BP	GO:0046864	3.83271	0.0359661	0.112994	isoprenoid transport
BP	GO:0046865	3.83271	0.0359661	0.112994	terpenoid transport
BP	GO:0051091	3.83271	0.0359661	0.112994	positive regulation of DNA-binding transcription factor activity
BP	GO:0072722	3.83271	0.0359661	0.112994	response to amitrole
BP	GO:0090057	3.83271	0.0359661	0.112994	root radial pattern formation
MF	GO:0005354	3.83271	0.0359661	0.112994	galactose transmembrane transporter activity
MF	GO:0035673	3.83271	0.0359661	0.112994	oligopeptide transmembrane transporter activity
MF	GO:0042937	3.83271	0.0359661	0.112994	tripeptide transmembrane transporter activity
MF	GO:0098599	3.83271	0.0359661	0.112994	palmitoyl hydrolase activity
MF	GO:1990137	3.83271	0.0359661	0.112994	plant seed peroxidase activity
BP	GO:0015697	3.68071	0.00820547	0.169492	quaternary ammonium group transport
BP	GO:0015808	3.68071	0.00820547	0.169492	L-alanine transport
BP	GO:0032328	3.68071	0.00820547	0.169492	alanine transport
BP	GO:2001142	3.68071	0.00820547	0.169492	nicotinate transport
BP	GO:2001143	3.68071	0.00820547	0.169492	N-methylnicotinate transport
MF	GO:0004473	3.68071	0.00820547	0.169492	malate dehydrogenase (decarboxylating) (NADP+) activity
MF	GO:0005351	3.68071	0.00820547	0.169492	carbohydrate:proton symporter activity
MF	GO:0005402	3.68071	0.00820547	0.169492	carbohydrate:cation symporter activity
MF	GO:0090416	3.68071	0.00820547	0.169492	nicotinate transmembrane transporter activity
MF	GO:0090417	3.68071	0.00820547	0.169492	N-methylnicotinate transmembrane transporter activity
BP	GO:0010623	3.61032	0.00168029	0.225989	programmed cell death involved in cell development
MF	GO:0004470	3.61032	0.00168029	0.225989	malic enzyme activity
MF	GO:0004471	3.61032	0.00168029	0.225989	malate dehydrogenase (decarboxylating) (NAD+) activity
BP	GO:0006560	3.41768	0.000140513	0.338983	proline metabolic process
MF	GO:0015145	3.41768	0.000140513	0.338983	monosaccharide transmembrane transporter activity
BP	GO:0072529	3.41768	0.000645175	0.282486	pyrimidine-containing compound catabolic process
BP	GO:0008645	3.41768	0.013687	0.169492	hexose transmembrane transport
BP	GO:0009068	3.41768	0.013687	0.169492	aspartate family amino acid catabolic process
BP	GO:0010304	3.41768	0.013687	0.169492	PSII associated light-harvesting complex II catabolic process
BP	GO:0019632	3.41768	0.013687	0.169492	shikimate metabolic process
MF	GO:0015651	3.41768	0.013687	0.169492	quaternary ammonium group transmembrane transporter activity
BP	GO:0015749	3.30219	0.000221782	0.338983	monosaccharide transmembrane transport
BP	GO:0032491	3.28017	0.00103372	0.282486	detection of molecule of fungal origin
MF	GO:0015180	3.28017	0.00103372	0.282486	L-alanine transmembrane transporter activity
MF	GO:0022858	3.28017	0.00103372	0.282486	alanine transmembrane transporter activity
BP	GO:0051180	3.24775	0.00481275	0.225989	vitamin transport
BP	GO:0046244	3.22503	7.69497e-05	0.39548	salicylic acid catabolic process
MF	GO:0051119	3.19528	0.000355054	0.338983	sugar transmembrane transporter activity
BP	GO:0001504	3.19528	0.0197689	0.169492	neurotransmitter uptake
BP	GO:0046133	3.19528	0.0197689	0.169492	pyrimidine ribonucleoside catabolic process
BP	GO:0046135	3.19528	0.0197689	0.169492	pyrimidine nucleoside catabolic process
BP	GO:0080026	3.19528	0.0197689	0.169492	response to indolebutyric acid
BP	GO:0089718	3.19528	0.0197689	0.169492	amino acid import across plasma membrane
BP	GO:0098712	3.19528	0.0197689	0.169492	L-glutamate import across plasma membrane
MF	GO:0009916	3.19528	0.0197689	0.169492	alternative oxidase activity
MF	GO:0016703	3.19528	0.0197689	0.169492	oxidoreductase activity, acting on single donors with incorporation of molecular oxygen, incorporation of one atom of oxygen (internal monooxygenases or internal mixed function oxidases)
BP	GO:0010446	3.15464	0.00153146	0.282486	response to alkaline pH
BP	GO:0071467	3.15464	0.00153146	0.282486	cellular response to pH
BP	GO:0071469	3.15464	0.00153146	0.282486	cellular response to alkaline pH
BP	GO:1900067	3.15464	0.00153146	0.282486	regulation of cellular response to alkaline pH
MF	GO:0045548	3.09574	0.000527675	0.338983	phenylalanine ammonia-lyase activity
BP	GO:0002240	3.09574	0.0072249	0.225989	response to molecule of oomycetes origin
BP	GO:0015996	3.0551	0.000175758	0.39548	chlorophyll catabolic process
MF	GO:0005460	3.03916	0.00229397	0.282486	UDP-glucose transmembrane transporter activity
MF	GO:0047714	3.03916	0.00229397	0.282486	galactolipase activity
BP	GO:0006559	3.00263	1.7017e-05	0.508475	L-phenylalanine catabolic process
BP	GO:1902222	3.00263	1.7017e-05	0.508475	erythrose 4-phosphate/phosphoenolpyruvate family amino acid catabolic process
MF	GO:0005459	3.00263	0.000756741	0.338983	UDP-galactose transmembrane transporter activity
BP	GO:0051560	3.00263	0.0285498	0.169492	mitochondrial calcium ion homeostasis
BP	GO:0080024	3.00263	0.0285498	0.169492	indolebutyric acid metabolic process
BP	GO:0080148	3.00263	0.0285498	0.169492	negative regulation of response to water deprivation
MF	GO:0080030	3.00263	0.0285498	0.169492	methyl indole-3-acetate esterase activity
BP	GO:0046149	2.9771	0.000243942	0.39548	pigment catabolic process
BP	GO:0019336	2.95824	7.89672e-05	0.451977	phenol-containing compound catabolic process
BP	GO:0006690	2.95824	0.00974075	0.225989	icosanoid metabolic process
BP	GO:0010597	2.95824	0.00974075	0.225989	green leaf volatile biosynthetic process
BP	GO:0019372	2.95824	0.00974075	0.225989	lipoxygenase pathway
BP	GO:0034389	2.93224	0.00323736	0.282486	lipid droplet organization
MF	GO:0015645	2.91517	0.0010331	0.338983	fatty acid ligase activity
BP	GO:0009819	2.83271	1.50559e-05	0.564972	drought recovery
BP	GO:0034219	2.83271	0.000471742	0.39548	carbohydrate transmembrane transport
BP	GO:0009268	2.83271	0.00138996	0.338983	response to pH
BP	GO:0072334	2.83271	0.00441983	0.282486	UDP-galactose transmembrane transport
MF	GO:0004467	2.83271	0.00441983	0.282486	long-chain fatty acid-CoA ligase activity
BP	GO:0015786	2.83271	0.0132297	0.225989	UDP-glucose transmembrane transport
BP	GO:0006213	2.83271	0.0380216	0.169492	pyrimidine nucleoside metabolic process
BP	GO:0006572	2.83271	0.0380216	0.169492	tyrosine catabolic process
BP	GO:0009395	2.83271	0.0380216	0.169492	phospholipid catabolic process
BP	GO:0046113	2.83271	0.0380216	0.169492	nucleobase catabolic process
BP	GO:0046131	2.83271	0.0380216	0.169492	pyrimidine ribonucleoside metabolic process
BP	GO:0071836	2.83271	0.0380216	0.169492	nectar secretion
BP	GO:0006787	2.77381	0.000205791	0.451977	porphyrin-containing compound catabolic process
BP	GO:0033015	2.77381	0.000205791	0.451977	tetrapyrrole catabolic process
BP	GO:0009595	2.7396	0.00586838	0.282486	detection of biotic stimulus
BP	GO:0098581	2.7396	0.00586838	0.282486	detection of external biotic stimulus
MF	GO:0016615	2.7396	0.00586838	0.282486	malate dehydrogenase activity
BP	GO:0009065	2.71723	0.0162522	0.225989	glutamine family amino acid catabolic process
BP	GO:0015783	2.71723	0.0162522	0.225989	GDP-fucose transmembrane transport
MF	GO:0016841	2.6807	0.0024604	0.338983	ammonia-lyase activity
BP	GO:0043200	2.6807	0.0485421	0.169492	response to amino acid
BP	GO:0051552	2.6807	0.0485421	0.169492	flavone metabolic process
BP	GO:0051553	2.6807	0.0485421	0.169492	flavone biosynthetic process
BP	GO:0051554	2.6807	0.0485421	0.169492	flavonol metabolic process
BP	GO:0051555	2.6807	0.0485421	0.169492	flavonol biosynthetic process
MF	GO:0047724	2.6807	0.0485421	0.169492	inosine nucleosidase activity
MF	GO:0016405	2.66278	0.000353055	0.451977	CoA-ligase activity
MF	GO:0005457	2.65214	0.00763411	0.282486	GDP-fucose transmembrane transporter activity
MF	GO:0036080	2.65214	0.00763411	0.282486	purine nucleotide-sugar transmembrane transporter activity
BP	GO:0009084	2.64006	0.00103696	0.39548	glutamine family amino acid biosynthetic process
BP	GO:0009269	2.6334	0.000152573	0.508475	response to desiccation
MF	GO:0016878	2.61032	0.000455276	0.451977	acid-thiol ligase activity
BP	GO:0090480	2.61032	0.020619	0.225989	purine nucleotide-sugar transmembrane transport
MF	GO:0080032	2.61032	0.020619	0.225989	methyl jasmonate esterase activity
BP	GO:0006558	2.56967	7.93717e-05	0.564972	L-phenylalanine metabolic process
BP	GO:1902221	2.56967	7.93717e-05	0.564972	erythrose 4-phosphate/phosphoenolpyruvate family amino acid metabolic process
BP	GO:0006108	2.56967	0.00936754	0.282486	malate metabolic process
BP	GO:0051289	2.56967	0.00936754	0.282486	protein homotetramerization
MF	GO:0004806	2.56967	0.00936754	0.282486	triglyceride lipase activity
BP	GO:0043562	2.51078	0.000719473	0.451977	cellular response to nitrogen levels
BP	GO:0006308	2.51078	0.0260364	0.225989	DNA catabolic process
BP	GO:0006995	2.51078	0.0260364	0.225989	cellular response to nitrogen starvation
BP	GO:0009862	2.51078	0.0260364	0.225989	systemic acquired resistance, salicylic acid mediated signaling pathway
MF	GO:0090482	2.51078	0.0260364	0.225989	vitamin transmembrane transporter activity
BP	GO:0015696	2.49167	0.0115511	0.282486	ammonium transport
BP	GO:0015804	2.47907	0.00502785	0.338983	neutral amino acid transport
BP	GO:0019432	2.46348	0.000880154	0.451977	triglyceride biosynthetic process
BP	GO:0009074	2.45831	0.00038029	0.508475	aromatic amino acid family catabolic process
BP	GO:0042447	2.4542	0.000163244	0.564972	hormone catabolic process
BP	GO:0008643	2.41767	3.37746e-05	0.677966	carbohydrate transport
MF	GO:0005313	2.41767	0.0140955	0.282486	L-glutamate transmembrane transporter activity
MF	GO:0008519	2.41767	0.0140955	0.282486	ammonium transmembrane transporter activity
MF	GO:0005548	2.41767	0.0321617	0.225989	phospholipid transporter activity
MF	GO:0015144	2.37814	0.00057244	0.508475	carbohydrate transmembrane transporter activity
BP	GO:0046460	2.37328	0.00130418	0.451977	neutral lipid biosynthetic process
BP	GO:0046463	2.37328	0.00130418	0.451977	acylglycerol biosynthetic process
MF	GO:0015175	2.37328	0.00130418	0.451977	neutral amino acid transmembrane transporter activity
MF	GO:0015293	2.35878	0.00767282	0.338983	symporter activity
BP	GO:0006536	2.34728	0.0162642	0.282486	glutamate metabolic process
BP	GO:0015914	2.34728	0.0162642	0.282486	phospholipid transport
BP	GO:0006152	2.33021	0.0376741	0.225989	purine nucleoside catabolic process
BP	GO:0009970	2.33021	0.0376741	0.225989	cellular response to sulfate starvation
MF	GO:0003997	2.33021	0.0376741	0.225989	acyl-CoA oxidase activity
MF	GO:0008515	2.33021	0.0376741	0.225989	sucrose transmembrane transporter activity
MF	GO:0008028	2.31813	0.00386118	0.39548	monocarboxylic acid transmembrane transporter activity
BP	GO:0009064	2.30219	7.6517e-05	0.677966	glutamine family amino acid metabolic process
BP	GO:0001676	2.30219	0.00880904	0.338983	long-chain fatty acid metabolic process
BP	GO:0009063	2.29666	9.21156e-08	1.12994	cellular amino acid catabolic process
MF	GO:0016877	2.28017	0.000429345	0.564972	ligase activity, forming carbon-sulfur bonds
BP	GO:0009164	2.28017	0.0195291	0.282486	nucleoside catabolic process
BP	GO:0034656	2.28017	0.0195291	0.282486	nucleobase-containing small molecule catabolic process
MF	GO:0004069	2.28017	0.0195291	0.282486	L-aspartate:2-oxoglutarate aminotransferase activity
MF	GO:0015112	2.28017	0.0195291	0.282486	nitrate transmembrane transporter activity
MF	GO:0015294	2.28017	0.0195291	0.282486	solute:cation symporter activity
MF	GO:0015179	2.27083	0.0046119	0.39548	L-amino acid transmembrane transporter activity
BP	GO:1901606	2.26567	7.20922e-07	1.01695	alpha-amino acid catabolic process
MF	GO:0008483	2.26013	4.58267e-05	0.734463	transaminase activity
MF	GO:0016769	2.26013	4.58267e-05	0.734463	transferase activity, transferring nitrogenous groups
BP	GO:0006641	2.24775	0.000511432	0.564972	triglyceride metabolic process
BP	GO:1901658	2.24775	0.00230289	0.451977	glycosyl compound catabolic process
BP	GO:1901071	2.24775	0.0104125	0.338983	glucosamine-containing compound metabolic process
MF	GO:0004568	2.24775	0.0104125	0.338983	chitinase activity
MF	GO:0015172	2.24775	0.0104125	0.338983	acidic amino acid transmembrane transporter activity
MF	GO:0015174	2.24775	0.0104125	0.338983	basic amino acid transmembrane transporter activity
MF	GO:0015154	2.24775	0.0451081	0.225989	disaccharide transmembrane transporter activity
MF	GO:0015157	2.24775	0.0451081	0.225989	oligosaccharide transmembrane transporter activity
MF	GO:0015556	2.24775	0.0451081	0.225989	C4-dicarboxylate transmembrane transporter activity
MF	GO:0050145	2.24775	0.0451081	0.225989	nucleoside monophosphate kinase activity
BP	GO:0006022	2.21604	0.0229137	0.282486	aminoglycan metabolic process
BP	GO:0006026	2.21604	0.0229137	0.282486	aminoglycan catabolic process
BP	GO:0006030	2.21604	0.0229137	0.282486	chitin metabolic process
BP	GO:0006032	2.21604	0.0229137	0.282486	chitin catabolic process
BP	GO:0046348	2.21604	0.0229137	0.282486	amino sugar catabolic process
BP	GO:0070588	2.21604	0.0229137	0.282486	calcium ion transmembrane transport
BP	GO:1901072	2.21604	0.0229137	0.282486	glucosamine-containing compound catabolic process
MF	GO:0005326	2.21604	0.0229137	0.282486	neurotransmitter transporter activity
MF	GO:0015171	2.21122	6.69015e-05	0.734463	amino acid transmembrane transporter activity
MF	GO:0004197	2.19528	0.0123652	0.338983	cysteine-type endopeptidase activity
MF	GO:0015165	2.19528	0.0123652	0.338983	pyrimidine nucleotide-sugar transmembrane transporter activity
BP	GO:1901616	2.18501	0.000714892	0.564972	organic hydroxy compound catabolic process
BP	GO:0046271	2.16975	0.00018536	0.677966	phenylpropanoid catabolic process
BP	GO:0046274	2.16975	0.00018536	0.677966	lignin catabolic process
BP	GO:0015718	2.14918	0.000431807	0.621469	monocarboxylic acid transport
BP	GO:0051262	2.14465	0.0142994	0.338983	protein tetramerization
MF	GO:0005319	2.13756	0.00765873	0.39548	lipid transporter activity
CC	GO:0005811	2.13756	0.00765873	0.39548	lipid droplet
MF	GO:0005338	2.09574	0.00859807	0.39548	nucleotide-sugar transmembrane transporter activity
BP	GO:0006836	2.09574	0.0316051	0.282486	neurotransmitter transport
BP	GO:0010112	2.09574	0.0316051	0.282486	regulation of systemic acquired resistance
BP	GO:0072523	2.09574	0.0316051	0.282486	purine-containing compound catabolic process
MF	GO:0008514	2.07598	1.85684e-09	1.63842	organic anion transmembrane transporter activity
MF	GO:0016701	2.0719	0.000346266	0.677966	oxidoreductase activity, acting on single donors with incorporation of molecular oxygen
MF	GO:0005342	2.06852	6.78649e-07	1.18644	organic acid transmembrane transporter activity
MF	GO:0046943	2.06852	6.78649e-07	1.18644	carboxylic acid transmembrane transporter activity
BP	GO:0072329	2.06569	2.98464e-06	1.07345	monocarboxylic acid catabolic process
BP	GO:0009696	2.04844	0.000399316	0.677966	salicylic acid metabolic process
MF	GO:0005315	2.03916	0.0358719	0.282486	inorganic phosphate transmembrane transporter activity
MF	GO:0016872	2.03916	0.0358719	0.282486	intramolecular lyase activity
BP	GO:0001505	1.9914	0.00691935	0.451977	regulation of neurotransmitter levels
MF	GO:0016682	1.98471	0.00198932	0.564972	oxidoreductase activity, acting on diphenols and related substances as donors, oxygen as acceptor
BP	GO:0044282	1.98344	2.13809e-12	2.37288	small molecule catabolic process
BP	GO:0015748	1.97289	0.00396611	0.508475	organophosphate ester transport
BP	GO:0015780	1.93963	0.014598	0.39548	nucleotide-sugar transmembrane transport
MF	GO:0015932	1.93655	0.000776536	0.677966	nucleobase-containing compound transmembrane transporter activity
BP	GO:0006638	1.93225	0.00260418	0.564972	neutral lipid metabolic process
BP	GO:0006639	1.93225	0.00260418	0.564972	acylglycerol metabolic process
BP	GO:0090481	1.93225	0.0458236	0.282486	pyrimidine nucleotide-sugar transmembrane transport
BP	GO:0016054	1.92892	5.59511e-09	1.75141	organic acid catabolic process
BP	GO:0046395	1.92892	5.59511e-09	1.75141	carboxylic acid catabolic process
MF	GO:0004970	1.9031	0.0158979	0.39548	ionotropic glutamate receptor activity
MF	GO:0005230	1.9031	0.0158979	0.39548	extracellular ligand-gated ion channel activity
MF	GO:0005310	1.9031	0.0158979	0.39548	dicarboxylic acid transmembrane transporter activity
MF	GO:0008066	1.9031	0.0158979	0.39548	glutamate receptor activity
MF	GO:0022824	1.9031	0.0158979	0.39548	transmitter-gated ion channel activity
MF	GO:0022835	1.9031	0.0158979	0.39548	transmitter-gated channel activity
MF	GO:0030594	1.9031	0.0158979	0.39548	neurotransmitter receptor activity
BP	GO:1901136	1.88929	0.000590368	0.734463	carbohydrate derivative catabolic process
MF	GO:1901505	1.88929	0.000590368	0.734463	carbohydrate derivative transmembrane transporter activity
BP	GO:0006865	1.88715	0.00586569	0.508475	amino acid transport
BP	GO:0003333	1.87335	0.0309034	0.338983	amino acid transmembrane transport
BP	GO:0009699	1.83271	5.53321e-05	1.01695	phenylpropanoid biosynthetic process
MF	GO:0030145	1.83271	0.000833457	0.734463	manganese ion binding
MF	GO:0019205	1.83271	0.0348708	0.338983	nucleobase-containing compound kinase activity
BP	GO:0015711	1.82497	3.34487e-08	1.75141	organic anion transport
BP	GO:0015849	1.82073	1.99622e-05	1.12994	organic acid transport
BP	GO:0046942	1.82073	1.99622e-05	1.12994	carboxylic acid transport
MF	GO:0051213	1.81101	0.00277008	0.621469	dioxygenase activity
BP	GO:1901264	1.80886	0.00480443	0.564972	carbohydrate derivative transport
MF	GO:0015085	1.79876	0.0223212	0.39548	calcium ion transmembrane transporter activity
BP	GO:0009808	1.79523	4.62916e-05	1.07345	lignin metabolic process
BP	GO:0010117	1.79318	0.0377947	0.338983	photoprotection
BP	GO:0018958	1.77826	0.00115977	0.734463	phenol-containing compound metabolic process
BP	GO:0006972	1.77381	0.000260176	0.903955	hyperosmotic response
MF	GO:0016702	1.77381	0.015211	0.451977	oxidoreductase activity, acting on single donors with incorporation of molecular oxygen, incorporation of two atoms of oxygen
BP	GO:0042538	1.75471	0.00225075	0.677966	hyperosmotic salinity response
BP	GO:0009695	1.75471	0.00995319	0.508475	jasmonic acid biosynthetic process
BP	GO:0006040	1.75471	0.042191	0.338983	amino sugar metabolic process
MF	GO:0016679	1.74782	0.00390156	0.621469	oxidoreductase activity, acting on diphenols and related substances as donors
BP	GO:0042537	1.74307	0.0014201	0.734463	benzene-containing compound metabolic process
MF	GO:0008509	1.72961	9.96605e-11	2.54237	anion transmembrane transporter activity
BP	GO:0009750	1.71723	0.0461752	0.338983	response to fructose
BP	GO:0010192	1.69521	0.00828854	0.564972	mucilage biosynthetic process
BP	GO:0002238	1.67044	0.0340826	0.39548	response to molecule of fungal origin
BP	GO:0010193	1.65214	0.00969804	0.564972	response to ozone
BP	GO:0034440	1.64829	0.00651945	0.621469	lipid oxidation
BP	GO:0009062	1.63108	0.0104591	0.564972	fatty acid catabolic process
BP	GO:0009698	1.6269	1.37342e-05	1.41243	phenylpropanoid metabolic process
BP	GO:0010200	1.60138	4.59513e-05	1.29944	response to chitin
BP	GO:0010191	1.58985	0.0127559	0.564972	mucilage metabolic process
MF	GO:0030247	1.56968	3.17263e-07	1.9774	polysaccharide binding
BP	GO:0009072	1.55969	0.00122911	0.903955	aromatic amino acid family metabolic process
MF	GO:0050897	1.55969	0.00666937	0.677966	cobalt ion binding
MF	GO:0045551	1.5526	0.0472517	0.39548	cinnamyl-alcohol dehydrogenase activity
BP	GO:0080167	1.54497	1.99201e-07	2.0904	response to karrikin
BP	GO:0002239	1.5269	0.00786785	0.677966	response to oomycetes
BP	GO:0034754	1.52151	0.0237494	0.508475	cellular hormone metabolic process
MF	GO:0005516	1.51078	0.000381613	1.12994	calmodulin binding
BP	GO:0006820	1.50438	1.34858e-08	2.54237	anion transport
BP	GO:0044550	1.50279	8.37096e-05	1.35593	secondary metabolite biosynthetic process
BP	GO:0010243	1.50256	9.58772e-07	1.9774	response to organonitrogen compound
BP	GO:1901605	1.49711	5.53925e-08	2.37288	alpha-amino acid metabolic process
BP	GO:1903825	1.48694	0.039185	0.451977	organic acid transmembrane transport
BP	GO:1905039	1.48694	0.039185	0.451977	carboxylic acid transmembrane transport
BP	GO:0019395	1.47907	0.0284491	0.508475	fatty acid oxidation
MF	GO:0019901	1.46771	0.0147033	0.621469	protein kinase binding
BP	GO:0006635	1.46348	0.0427168	0.451977	fatty acid beta-oxidation
BP	GO:0048544	1.44938	0.000212808	1.29944	recognition of pollen
MF	GO:0004888	1.44039	0.0457894	0.451977	transmembrane signaling receptor activity
BP	GO:0009816	1.43785	0.033215	0.508475	defense response to bacterium, incompatible interaction
BP	GO:0008037	1.43344	0.000248936	1.29944	cell recognition
BP	GO:0010150	1.41767	0.000148807	1.41243	leaf senescence
BP	GO:0009875	1.41767	0.000205294	1.35593	pollen-pistil interaction
BP	GO:0010224	1.41767	0.00479807	0.847458	response to UV-B
BP	GO:0010214	1.41767	0.0177261	0.621469	seed coat development
MF	GO:0005509	1.40107	3.99583e-09	3.05085	calcium ion binding
BP	GO:0090693	1.39701	0.000131337	1.46893	plant organ senescence
BP	GO:0098656	1.37815	0.00223415	1.01695	anion transmembrane transport
BP	GO:0009850	1.37665	0.0115345	0.734463	auxin metabolic process
BP	GO:0009749	1.37328	0.0157203	0.677966	response to glucose
CC	GO:0005777	1.3712	6.72269e-07	2.37288	peroxisome
CC	GO:0042579	1.3712	6.72269e-07	2.37288	microbody
BP	GO:0009611	1.36738	8.7733e-12	4.18079	response to wounding
MF	GO:0004867	1.36239	0.00482574	0.903955	serine-type endopeptidase inhibitor activity
BP	GO:0006869	1.35466	0.00941723	0.79096	lipid transport
BP	GO:0042430	1.34443	0.0177173	0.677966	indole-containing compound metabolic process
MF	GO:0045735	1.34443	0.0177173	0.677966	nutrient reservoir activity
BP	GO:0044242	1.34086	0.0055964	0.903955	cellular lipid catabolic process
BP	GO:0009627	1.33967	0.00293532	1.01695	systemic acquired resistance
MF	GO:0004620	1.33967	0.0458883	0.508475	phospholipase activity
MF	GO:0016298	1.33675	0.0141437	0.734463	lipase activity
BP	GO:0015698	1.31333	0.00878633	0.847458	inorganic anion transport
BP	GO:0032787	1.31255	1.08842e-12	4.85876	monocarboxylic acid metabolic process
MF	GO:0015103	1.3022	0.00942252	0.847458	inorganic anion transmembrane transporter activity
BP	GO:0034284	1.29793	0.0162484	0.734463	response to monosaccharide
BP	GO:0006631	1.29368	7.21128e-06	2.20339	fatty acid metabolic process
BP	GO:1901698	1.28226	6.86957e-07	2.65537	response to nitrogen compound
MF	GO:0071949	1.28017	0.0104579	0.847458	FAD binding
MF	GO:0008374	1.28017	0.0425244	0.564972	O-acyltransferase activity
BP	GO:0009694	1.27719	0.0328332	0.621469	jasmonic acid metabolic process
MF	GO:0016627	1.26013	0.0197862	0.734463	oxidoreductase activity, acting on the CH-CH group of donors
BP	GO:0009624	1.24775	0.0127381	0.847458	response to nematode
BP	GO:0015931	1.24775	0.0364987	0.621469	nucleobase-containing compound transport
BP	GO:0010876	1.23776	0.0102462	0.903955	lipid localization
BP	GO:0009746	1.23445	0.0297243	0.677966	response to hexose
MF	GO:0052689	1.23004	0.00652398	1.01695	carboxylic ester hydrolase activity
BP	GO:1901615	1.22128	9.69607e-06	2.37288	organic hydroxy compound metabolic process
BP	GO:0009411	1.20617	0.00587939	1.07345	response to UV
BP	GO:1901361	1.20369	9.79789e-06	2.42938	organic cyclic compound catabolic process
BP	GO:1901607	1.19271	0.00492604	1.12994	alpha-amino acid biosynthetic process
BP	GO:0009267	1.1906	0.00294939	1.24294	cellular response to starvation
MF	GO:0019900	1.18885	0.0137845	0.903955	kinase binding
BP	GO:0008652	1.18635	0.00236022	1.29944	cellular amino acid biosynthetic process
BP	GO:0031669	1.18147	0.00114509	1.46893	cellular response to nutrient levels
MF	GO:0030246	1.18063	5.55943e-08	3.55932	carbohydrate binding
BP	GO:0019748	1.17559	4.56349e-05	2.20339	secondary metabolic process
BP	GO:0042445	1.17151	1.67952e-05	2.42938	hormone metabolic process
BP	GO:0009644	1.14821	0.0265592	0.79096	response to high light intensity
BP	GO:0019439	1.14714	5.41745e-05	2.25989	aromatic compound catabolic process
MF	GO:0030170	1.14714	0.00699188	1.12994	pyridoxal phosphate binding
MF	GO:0070279	1.14714	0.00699188	1.12994	vitamin B6 binding
MF	GO:0015075	1.14177	3.27635e-10	4.85876	ion transmembrane transporter activity
MF	GO:0015291	1.14122	0.000830586	1.63842	secondary active transmembrane transporter activity
MF	GO:0046873	1.13914	0.00133126	1.52542	metal ion transmembrane transporter activity
MF	GO:0004497	1.13474	0.0224899	0.847458	monooxygenase activity
BP	GO:0030258	1.12699	0.0297295	0.79096	lipid modification
MF	GO:0019842	1.12106	0.00415949	1.29944	vitamin binding
MF	GO:0016616	1.11469	0.00441105	1.29944	oxidoreductase activity, acting on the CH-OH group of donors, NAD or NADP as acceptor
MF	GO:0030414	1.11187	0.0136314	1.01695	peptidase inhibitor activity
MF	GO:0016614	1.10688	0.00232676	1.46893	oxidoreductase activity, acting on CH-OH group of donors
BP	GO:0009814	1.09574	0.000554481	1.86441	defense response, incompatible interaction
BP	GO:0031668	1.09574	0.000690749	1.80791	cellular response to extracellular stimulus
CC	GO:0009705	1.09574	0.0177618	0.960452	plant-type vacuole membrane
BP	GO:0042594	1.08999	0.00344122	1.41243	response to starvation
BP	GO:1901657	1.08817	0.012704	1.07345	glycosyl compound metabolic process
MF	GO:0061134	1.0798	0.0159763	1.01695	peptidase regulator activity
CC	GO:0000325	1.07853	0.00383336	1.41243	plant-type vacuole
BP	GO:0071496	1.06895	0.000917983	1.80791	cellular response to external stimulus
BP	GO:0042737	1.06718	0.00140292	1.69492	drug catabolic process
MF	GO:0015318	1.06424	3.85417e-08	4.35028	inorganic molecular entity transmembrane transporter activity
BP	GO:1901617	1.05056	0.00877892	1.24294	organic hydroxy compound biosynthetic process
BP	GO:0007568	1.04683	0.00219064	1.63842	aging
MF	GO:0004866	1.0457	0.0235077	0.960452	endopeptidase inhibitor activity
MF	GO:0061135	1.0457	0.0235077	0.960452	endopeptidase regulator activity
BP	GO:0006520	1.04203	5.47682e-06	3.27684	cellular amino acid metabolic process
BP	GO:0009615	1.0352	0.0453178	0.79096	response to virus
BP	GO:0009787	1.0352	0.0453178	0.79096	regulation of abscisic acid-activated signaling pathway
BP	GO:1901419	1.0352	0.0453178	0.79096	regulation of response to alcohol
BP	GO:1905957	1.0352	0.0453178	0.79096	regulation of cellular response to alcohol
BP	GO:0044255	1.0172	3.39129e-08	4.74576	cellular lipid metabolic process
BP	GO:0000302	1.00263	0.00276973	1.69492	response to reactive oxygen species
BP	GO:0009620	0.992565	1.50717e-05	3.27684	response to fungus
BP	GO:0016042	0.983043	0.0396912	0.903955	lipid catabolic process
BP	GO:0006468	0.973993	3.82081e-20	12.7684	protein phosphorylation
BP	GO:0006811	0.963955	3.43532e-08	5.19774	ion transport
BP	GO:0006629	0.955789	2.30869e-09	6.0452	lipid metabolic process
BP	GO:0030001	0.954792	0.00108587	2.14689	metal ion transport
BP	GO:0019752	0.948698	9.52185e-12	7.74011	carboxylic acid metabolic process
MF	GO:0005215	0.941827	4.92159e-12	8.0791	transporter activity
BP	GO:0043436	0.938203	5.78751e-12	8.0791	oxoacid metabolic process
BP	GO:0006082	0.936395	6.17808e-12	8.0791	organic acid metabolic process
MF	GO:0005506	0.934396	3.31601e-05	3.38983	iron ion binding
MF	GO:0016301	0.932991	3.30626e-20	13.6723	kinase activity
MF	GO:0042578	0.92429	0.000823601	2.37288	phosphoric ester hydrolase activity
BP	GO:0010817	0.923355	0.000163168	2.93785	regulation of hormone levels
MF	GO:0004672	0.923332	6.319e-18	12.3729	protein kinase activity
BP	GO:0031667	0.920659	0.00526263	1.75141	response to nutrient levels
MF	GO:0022857	0.916721	4.64959e-11	7.74011	transmembrane transporter activity
MF	GO:0016791	0.91396	0.00292281	1.9774	phosphatase activity
BP	GO:0009617	0.913401	6.57091e-06	4.0678	response to bacterium
BP	GO:0050832	0.905559	0.000771351	2.48588	defense response to fungus
MF	GO:0016773	0.903879	2.7508e-18	13.1073	phosphotransferase activity, alcohol group as acceptor
MF	GO:0050662	0.896008	2.62129e-05	3.72881	coenzyme binding
MF	GO:0050660	0.894108	0.0248972	1.24294	flavin adenine dinucleotide binding
BP	GO:0046486	0.894108	0.0454845	1.01695	glycerolipid metabolic process
BP	GO:0009991	0.892414	0.0026999	2.0904	response to extracellular stimulus
CC	GO:0016021	0.887634	5.87421e-09	6.55367	integral component of membrane
BP	GO:0016310	0.887159	6.81648e-18	13.2203	phosphorylation
BP	GO:0071396	0.88648	0.00153645	2.31638	cellular response to lipid
BP	GO:0012501	0.88577	0.00838284	1.69492	programmed cell death
BP	GO:0072330	0.885176	0.00400808	1.9774	monocarboxylic acid biosynthetic process
BP	GO:0009415	0.881618	3.68538e-06	4.51977	response to water
BP	GO:0055085	0.874356	3.10494e-09	6.94915	transmembrane transport
MF	GO:0016705	0.866053	8.88261e-05	3.50282	oxidoreductase activity, acting on paired donors, with incorporation or reduction of molecular oxygen
CC	GO:0031224	0.863082	1.07894e-09	7.45763	intrinsic component of membrane
MF	GO:0022804	0.856476	0.000544421	2.88136	active transmembrane transporter activity
BP	GO:0046700	0.855145	0.0158073	1.52542	heterocycle catabolic process
BP	GO:0042742	0.853229	0.000182021	3.33333	defense response to bacterium
MF	GO:0008324	0.850727	0.00102644	2.65537	cation transmembrane transporter activity
BP	GO:0006796	0.850111	2.55765e-20	16.1017	phosphate-containing compound metabolic process
BP	GO:0006793	0.844868	3.70454e-20	16.2712	phosphorus metabolic process
BP	GO:0009743	0.832712	0.0328743	1.29944	response to carbohydrate
BP	GO:0042493	0.826258	2.23037e-06	5.25424	response to drug
BP	GO:0044281	0.826046	4.08746e-12	10.1695	small molecule metabolic process
MF	GO:0016772	0.823048	1.01461e-16	14.0113	transferase activity, transferring phosphorus-containing groups
BP	GO:0042440	0.821824	0.0391353	1.24294	pigment metabolic process
BP	GO:0043207	0.821049	2.33335e-10	8.70056	response to external biotic stimulus
BP	GO:0051707	0.821049	2.33335e-10	8.70056	response to other organism
BP	GO:0009607	0.820273	2.36197e-10	8.70056	response to biotic stimulus
BP	GO:0009751	0.815633	0.00325432	2.37288	response to salicylic acid
CC	GO:0005774	0.814222	1.14932e-05	4.74576	vacuolar membrane
BP	GO:0009555	0.81327	0.00292482	2.42938	pollen development
CC	GO:0044437	0.808583	1.33568e-05	4.74576	vacuolar part
BP	GO:0010035	0.808294	7.67304e-11	9.37853	response to inorganic substance
MF	GO:0016491	0.805565	6.58588e-14	12.1469	oxidoreductase activity
BP	GO:0009739	0.802962	0.0353336	1.35593	response to gibberellin
BP	GO:0006812	0.798764	0.000674567	3.16384	cation transport
BP	GO:0006979	0.797088	3.05738e-05	4.51977	response to oxidative stress
BP	GO:0071702	0.795617	3.15223e-05	4.51977	organic substance transport
BP	GO:0006952	0.793996	3.65045e-09	8.13559	defense response
BP	GO:0009642	0.79318	0.0368172	1.35593	response to light intensity
CC	GO:0098588	0.791681	1.29151e-06	5.87571	bounding membrane of organelle
BP	GO:0008219	0.788318	0.0150185	1.80791	cell death
CC	GO:0005773	0.786906	1.03334e-09	8.75706	vacuole
BP	GO:0009605	0.786596	4.20089e-12	11.0169	response to external stimulus
BP	GO:0046677	0.785802	0.00064751	3.27684	response to antibiotic
BP	GO:0001101	0.785517	3.01476e-12	11.1864	response to acid chemical
BP	GO:0044270	0.782719	0.0315765	1.46893	cellular nitrogen compound catabolic process
BP	GO:0098542	0.780562	2.01654e-07	6.77966	defense response to other organism
BP	GO:0006970	0.773819	8.68878e-06	5.31073	response to osmotic stress
BP	GO:0009737	0.770863	7.29584e-05	4.40678	response to abscisic acid
BP	GO:1901700	0.770626	3.89484e-14	13.2768	response to oxygen-containing compound
BP	GO:0014070	0.765594	0.00110612	3.16384	response to organic cyclic compound
BP	GO:0097305	0.764966	8.03939e-05	4.40678	response to alcohol
BP	GO:0033993	0.755469	6.89703e-06	5.64972	response to lipid
CC	GO:0005576	0.754708	0.000206306	4.0678	extracellular region
MF	GO:0008144	0.750306	1.19336e-18	18.0226	drug binding
BP	GO:0016053	0.746158	0.000766035	3.50282	organic acid biosynthetic process
BP	GO:0046394	0.746158	0.000766035	3.50282	carboxylic acid biosynthetic process
BP	GO:0006464	0.745452	5.97822e-16	15.7062	cellular protein modification process
BP	GO:0036211	0.745452	5.97822e-16	15.7062	protein modification process
BP	GO:0071215	0.745246	0.0495834	1.35593	cellular response to abscisic acid stimulus
BP	GO:0097306	0.745246	0.0495834	1.35593	cellular response to alcohol
CC	GO:0098805	0.744066	1.51479e-05	5.42373	whole membrane
BP	GO:0009414	0.739278	0.000319019	4.0113	response to water deprivation
BP	GO:0055114	0.734863	1.43338e-10	10.7345	oxidation-reduction process
BP	GO:0034220	0.733979	0.0101915	2.25989	ion transmembrane transport
MF	GO:0004842	0.732104	0.0289408	1.69492	ubiquitin-protein transferase activity
BP	GO:0006810	0.724851	6.85473e-12	12.3729	transport
BP	GO:0051234	0.716728	9.39102e-12	12.4294	establishment of localization
BP	GO:0044283	0.709652	0.000453563	4.12429	small molecule biosynthetic process
BP	GO:0009651	0.709132	0.000179767	4.63277	response to salt stress
MF	GO:0005524	0.705456	2.9883e-15	16.4407	ATP binding
MF	GO:0019787	0.702507	0.0360373	1.69492	ubiquitin-like protein transferase activity
BP	GO:0008610	0.697783	0.00510787	2.88136	lipid biosynthetic process
BP	GO:0051179	0.694051	1.50551e-11	12.8814	localization
MF	GO:0035639	0.682474	3.10755e-15	17.2881	purine ribonucleoside triphosphate binding
BP	GO:1901565	0.673511	0.00773202	2.82486	organonitrogen compound catabolic process
BP	GO:0051704	0.668791	9.49034e-10	11.5819	multi-organism process
CC	GO:0005886	0.666666	9.55726e-12	14.0113	plasma membrane
CC	GO:0005794	0.658143	0.00020767	5.19774	Golgi apparatus
MF	GO:0140096	0.657576	2.26392e-15	18.5311	catalytic activity, acting on a protein
BP	GO:0046686	0.657558	0.00840445	2.88136	response to cadmium ion
BP	GO:0043412	0.655929	6.85106e-13	15.8192	macromolecule modification
MF	GO:0048037	0.645849	3.64071e-06	7.79661	cofactor binding
BP	GO:0045087	0.641565	0.010889	2.82486	innate immune response
BP	GO:0002376	0.640612	0.00764736	3.10734	immune system process
BP	GO:1901575	0.630182	0.000325108	5.31073	organic substance catabolic process
BP	GO:0042221	0.6277	8.67456e-15	19.209	response to chemical
BP	GO:0009056	0.619385	7.66174e-05	6.44068	catabolic process
CC	GO:0048046	0.61471	0.0179611	2.65537	apoplast
BP	GO:0044248	0.610313	0.000313562	5.64972	cellular catabolic process
BP	GO:0071705	0.608544	0.00878755	3.27684	nitrogen compound transport
BP	GO:0048229	0.60826	0.0156142	2.82486	gametophyte development
BP	GO:0017144	0.602837	0.0117531	3.10734	drug metabolic process
MF	GO:0016740	0.598622	4.71205e-16	22.3164	transferase activity
BP	GO:0006955	0.595962	0.0176858	2.82486	immune response
BP	GO:0071229	0.593526	0.00858023	3.44633	cellular response to acid chemical
CC	GO:0071944	0.585866	1.02987e-10	15.8192	cell periphery
BP	GO:0009753	0.583452	0.0468365	2.14689	response to jasmonic acid
CC	GO:0044425	0.578069	7.67915e-06	8.92655	membrane part
MF	GO:0016829	0.577209	0.0432894	2.25989	lyase activity
BP	GO:0010038	0.570278	0.00833598	3.72881	response to metal ion
BP	GO:1901701	0.567565	0.00443116	4.29379	cellular response to oxygen-containing compound
CC	GO:0005783	0.565373	0.00373975	4.46328	endoplasmic reticulum
BP	GO:0009409	0.553213	0.0362041	2.59887	response to cold
BP	GO:0009628	0.546373	5.0572e-08	13.4463	response to abiotic stimulus
MF	GO:0020037	0.545771	0.0132317	3.61582	heme binding
MF	GO:0032559	0.543417	2.5876e-10	17.1751	adenyl ribonucleotide binding
MF	GO:0030554	0.542773	2.67679e-10	17.1751	adenyl nucleotide binding
MF	GO:0036094	0.540583	1.03041e-12	21.1864	small molecule binding
MF	GO:0097367	0.538101	6.66305e-11	18.4746	carbohydrate derivative binding
MF	GO:0004674	0.533962	0.0433323	2.59887	protein serine/threonine kinase activity
MF	GO:0016798	0.531838	0.0443455	2.59887	hydrolase activity, acting on glycosyl bonds
MF	GO:0032555	0.53082	2.11731e-10	18.0226	purine ribonucleotide binding
MF	GO:0017076	0.530211	2.18389e-10	18.0226	purine nucleotide binding
MF	GO:0032553	0.523462	3.13909e-10	18.0791	ribonucleotide binding
CC	GO:0031090	0.522749	0.000589284	6.83616	organelle membrane
CC	GO:0012505	0.518152	7.22471e-05	8.87006	endomembrane system
MF	GO:0043168	0.51778	9.09566e-12	21.0169	anion binding
MF	GO:0000166	0.515753	6.72775e-11	19.7175	nucleotide binding
MF	GO:1901265	0.515753	6.72775e-11	19.7175	nucleoside phosphate binding
BP	GO:0006950	0.50853	2.04806e-10	19.322	response to stress
BP	GO:0010033	0.503227	2.73724e-06	12.2034	response to organic substance
BP	GO:1901135	0.501567	0.0422737	2.93785	carbohydrate derivative metabolic process
BP	GO:0071310	0.486653	0.0104497	4.68927	cellular response to organic substance
BP	GO:1901564	0.483106	8.74702e-14	26.8362	organonitrogen compound metabolic process
BP	GO:0032870	0.476226	0.0158671	4.35028	cellular response to hormone stimulus
CC	GO:0016020	0.46923	1.82462e-13	27.4576	membrane
BP	GO:0071495	0.467707	0.0179484	4.35028	cellular response to endogenous stimulus
BP	GO:0007154	0.460774	0.000490017	8.75706	cell communication
MF	GO:0046906	0.449936	0.0389476	3.67232	tetrapyrrole binding
BP	GO:0009725	0.442885	0.000206104	10.3955	response to hormone
MF	GO:0003824	0.441951	4.9175e-31	53.1073	catalytic activity
BP	GO:0009719	0.440888	0.000217722	10.3955	response to endogenous stimulus
BP	GO:0050896	0.43204	3.73645e-13	30.2825	response to stimulus
BP	GO:0070887	0.411177	0.0179583	5.48023	cellular response to chemical stimulus
BP	GO:0044267	0.408016	3.90651e-06	16.8362	cellular protein metabolic process
BP	GO:0065008	0.357901	0.0380763	5.59322	regulation of biological quality
BP	GO:0019538	0.356978	7.69256e-06	19.887	protein metabolic process
BP	GO:0032501	0.294994	0.00346526	14.1243	multicellular organismal process
BP	GO:0007275	0.246262	0.0263194	12.2034	multicellular organism development
CC	GO:0044444	0.19911	0.000969187	30.8475	cytoplasmic part
CC	GO:0005737	0.197891	0.000496757	33.3898	cytoplasm

## Sheet: 28_OEvsWT_D_up
Aspect	GO	Enrichment_log2	q-value	subset_ratio	description
BP	GO:0010258	4.59158	2.24346e-06	0.318674	NADH dehydrogenase complex (plastoquinone) assembly
BP	GO:0010275	4.59158	0.00084325	0.191205	NAD(P)H dehydrogenase complex assembly
MF	GO:0016984	4.59158	0.00084325	0.191205	ribulose-bisphosphate carboxylase activity
CC	GO:0080085	4.59158	0.00084325	0.191205	signal recognition particle, chloroplast targeting
BP	GO:0001561	4.59158	0.014737	0.12747	fatty acid alpha-oxidation
BP	GO:0009233	4.59158	0.014737	0.12747	menaquinone metabolic process
BP	GO:0009234	4.59158	0.014737	0.12747	menaquinone biosynthetic process
BP	GO:0030186	4.59158	0.014737	0.12747	melatonin metabolic process
BP	GO:0030187	4.59158	0.014737	0.12747	melatonin biosynthetic process
BP	GO:0062055	4.59158	0.014737	0.12747	photosynthetic state transition
BP	GO:0062075	4.59158	0.014737	0.12747	pollen aperture formation
BP	GO:0090143	4.59158	0.014737	0.12747	nucleoid organization
MF	GO:0004044	4.59158	0.014737	0.12747	amidophosphoribosyltransferase activity
MF	GO:0004059	4.59158	0.014737	0.12747	aralkylamine N-acetyltransferase activity
MF	GO:0004468	4.59158	0.014737	0.12747	lysine N-acetyltransferase activity, acting on acetyl phosphate as donor
MF	GO:0031409	4.59158	0.014737	0.12747	pigment binding
MF	GO:0045550	4.59158	0.014737	0.12747	geranylgeranyl reductase activity
MF	GO:0046028	4.59158	0.014737	0.12747	electron transporter, transferring electrons from cytochrome b6/f complex of photosystem II activity
MF	GO:0046422	4.59158	0.014737	0.12747	violaxanthin de-epoxidase activity
CC	GO:0009344	4.59158	0.014737	0.12747	nitrite reductase complex [NAD(P)H]
CC	GO:0009515	4.59158	0.014737	0.12747	granal stacked thylakoid
CC	GO:0009542	4.59158	0.014737	0.12747	granum
CC	GO:0030093	4.59158	0.014737	0.12747	chloroplast photosystem I
CC	GO:0098572	4.59158	0.014737	0.12747	stromal side of plastid thylakoid membrane
BP	GO:0110102	4.4761	1.20466e-14	0.764818	chloroplast ribulose bisphosphate carboxylase complex assembly
BP	GO:0010270	4.26965	0.000199255	0.254939	photosystem II oxygen evolving complex assembly
BP	GO:0090391	4.26965	0.000199255	0.254939	granum assembly
BP	GO:0009773	4.17654	1.32372e-12	0.764818	photosynthetic electron transport in photosystem I
BP	GO:0045038	4.10615	3.66461e-05	0.318674	protein import into chloroplast thylakoid membrane
BP	GO:0009157	4.00661	0.0317957	0.12747	deoxyribonucleoside monophosphate biosynthetic process
BP	GO:0009162	4.00661	0.0317957	0.12747	deoxyribonucleoside monophosphate metabolic process
BP	GO:0010322	4.00661	0.0317957	0.12747	regulation of isopentenyl diphosphate biosynthetic process, methylerythritol 4-phosphate pathway
BP	GO:0019464	4.00661	0.0317957	0.12747	glycine decarboxylation via glycine cleavage system
BP	GO:0051290	4.00661	0.0317957	0.12747	protein heterotetramerization
MF	GO:0008891	4.00661	0.0317957	0.12747	glycolate oxidase activity
MF	GO:0019136	4.00661	0.0317957	0.12747	deoxynucleoside kinase activity
MF	GO:0046715	4.00661	0.0317957	0.12747	active borate transmembrane transporter activity
MF	GO:0051920	4.00661	0.0317957	0.12747	peroxiredoxin activity
BP	GO:1901259	3.85461	1.52449e-05	0.382409	chloroplast rRNA processing
BP	GO:0042549	3.81397	2.47368e-06	0.446144	photosystem II stabilization
BP	GO:0032544	3.79803	3.0072e-13	0.956023	plastid translation
CC	GO:0009533	3.78422	5.07747e-14	1.01976	chloroplast stromal thylakoid
MF	GO:0016987	3.78422	0.00105413	0.254939	sigma factor activity
CC	GO:0030095	3.78422	0.00105413	0.254939	chloroplast photosystem II
CC	GO:0009512	3.74358	0.000190377	0.318674	cytochrome b6f complex
MF	GO:0045157	3.71711	3.00433e-05	0.382409	electron transporter, transferring electrons within the noncyclic electron transport pathway of photosynthesis activity
CC	GO:0009654	3.59157	3.02066e-11	0.892288	photosystem II oxygen evolving complex
BP	GO:0048564	3.59157	4.24317e-08	0.637349	photosystem I assembly
BP	GO:0010190	3.59157	0.00192948	0.254939	cytochrome b6f complex assembly
BP	GO:0043489	3.59157	0.00192948	0.254939	RNA stabilization
BP	GO:1902369	3.59157	0.00192948	0.254939	negative regulation of RNA catabolic process
CC	GO:0009544	3.59157	0.00192948	0.254939	chloroplast ATP synthase complex
BP	GO:0006546	3.59157	0.01173	0.191205	glycine catabolic process
BP	GO:0046713	3.59157	0.01173	0.191205	borate transport
BP	GO:0042548	3.49205	9.89184e-11	0.892288	regulation of photosynthesis, light reaction
CC	GO:0009539	3.4761	3.77731e-09	0.764818	photosystem II reaction center
CC	GO:0031977	3.46725	1.15808e-37	3.18674	thylakoid lumen
CC	GO:0000229	3.43957	7.82766e-07	0.573614	cytoplasmic chromosome
CC	GO:0009508	3.43957	7.82766e-07	0.573614	plastid chromosome
BP	GO:0010207	3.43403	1.06342e-09	0.828553	photosystem II assembly
BP	GO:0042274	3.42165	0.00320669	0.254939	ribosomal small subunit biogenesis
BP	GO:0031425	3.40715	3.70665e-08	0.701083	chloroplast RNA processing
CC	GO:0098807	3.36919	1.01668e-08	0.764818	chloroplast thylakoid membrane protein complex
CC	GO:0010598	3.36919	1.26585e-06	0.573614	NAD(P)H dehydrogenase complex (plastoquinone)
BP	GO:0006175	3.36919	0.016913	0.191205	dATP biosynthetic process
BP	GO:0006176	3.36919	0.016913	0.191205	dATP biosynthetic process from ADP
BP	GO:0009151	3.36919	0.016913	0.191205	purine deoxyribonucleotide metabolic process
BP	GO:0009153	3.36919	0.016913	0.191205	purine deoxyribonucleotide biosynthetic process
BP	GO:0009215	3.36919	0.016913	0.191205	purine deoxyribonucleoside triphosphate metabolic process
BP	GO:0009216	3.36919	0.016913	0.191205	purine deoxyribonucleoside triphosphate biosynthetic process
BP	GO:0010036	3.36919	0.016913	0.191205	response to boron-containing substance
BP	GO:0046060	3.36919	0.016913	0.191205	dATP metabolic process
MF	GO:0004332	3.36919	0.016913	0.191205	fructose-bisphosphate aldolase activity
CC	GO:0000312	3.35712	3.43676e-12	1.08349	plastid small ribosomal subunit
CC	GO:0009547	3.32853	4.12379e-21	1.91205	plastid ribosome
CC	GO:0009543	3.31147	1.55784e-19	1.78458	chloroplast thylakoid lumen
CC	GO:0031978	3.31147	1.55784e-19	1.78458	plastid thylakoid lumen
BP	GO:0010196	3.31147	4.25864e-05	0.446144	nonphotochemical quenching
BP	GO:0042793	3.31147	4.25864e-05	0.446144	plastid transcription
BP	GO:1990066	3.31147	4.25864e-05	0.446144	energy quenching
CC	GO:0000311	3.29201	4.4987e-09	0.828553	plastid large ribosomal subunit
BP	GO:0043487	3.26965	0.000250625	0.382409	regulation of RNA stability
BP	GO:0019682	3.26965	0.00493566	0.254939	glyceraldehyde-3-phosphate metabolic process
MF	GO:0008187	3.24762	7.03261e-09	0.828553	poly-pyrimidine tract binding
MF	GO:0008266	3.24762	7.03261e-09	0.828553	poly(U) RNA binding
CC	GO:0009523	3.2097	7.69042e-22	2.10325	photosystem II
BP	GO:0043467	3.18948	2.89232e-09	0.892288	regulation of generation of precursor metabolites and energy
CC	GO:0009521	3.18659	2.48225e-35	3.44168	photosystem
BP	GO:0009769	3.17654	0.000367451	0.382409	photosynthesis, light harvesting in photosystem II
BP	GO:0009938	3.17654	0.0240838	0.191205	negative regulation of gibberellic acid mediated signaling pathway
BP	GO:0019684	3.15973	1.73639e-62	6.11855	photosynthesis, light reaction
BP	GO:0009767	3.15717	8.40348e-24	2.35819	photosynthetic electron transport chain
BP	GO:0015979	3.13024	3.86821e-89	8.79541	photosynthesis
CC	GO:0009522	3.12591	2.2211e-13	1.33843	photosystem I
BP	GO:0010257	3.10615	0.00193109	0.318674	NADH dehydrogenase complex assembly
BP	GO:1900865	3.10615	0.00193109	0.318674	chloroplast RNA modification
CC	GO:0042651	3.10518	4.07637e-137	13.5118	thylakoid membrane
CC	GO:0009535	3.10249	7.19663e-127	12.5558	chloroplast thylakoid membrane
CC	GO:0055035	3.09165	7.65084e-127	12.6195	plastid thylakoid membrane
CC	GO:0034357	3.08131	2.51627e-139	13.8942	photosynthetic membrane
CC	GO:0044436	3.07323	6.46269e-146	14.5953	thylakoid part
MF	GO:0045156	3.03903	3.4899e-09	0.956023	electron transporter, transferring electrons within the cyclic electron transport pathway of photosynthesis activity
BP	GO:0006426	3.00661	0.0323293	0.191205	glycyl-tRNA aminoacylation
BP	GO:0006544	3.00661	0.0323293	0.191205	glycine metabolic process
BP	GO:0009071	3.00661	0.0323293	0.191205	serine family amino acid catabolic process
BP	GO:0009265	3.00661	0.0323293	0.191205	2'-deoxyribonucleotide biosynthetic process
BP	GO:0019288	3.00661	0.0323293	0.191205	isopentenyl diphosphate biosynthetic process, methylerythritol 4-phosphate pathway
BP	GO:0043461	3.00661	0.0323293	0.191205	proton-transporting ATP synthase complex assembly
BP	GO:0043488	3.00661	0.0323293	0.191205	regulation of mRNA stability
BP	GO:0046385	3.00661	0.0323293	0.191205	deoxyribose phosphate biosynthetic process
BP	GO:0071493	3.00661	0.0323293	0.191205	cellular response to UV-B
BP	GO:1901031	3.00661	0.0323293	0.191205	regulation of response to reactive oxygen species
MF	GO:0004784	3.00661	0.0323293	0.191205	superoxide dismutase activity
MF	GO:0004820	3.00661	0.0323293	0.191205	glycine-tRNA ligase activity
MF	GO:0008839	3.00661	0.0323293	0.191205	4-hydroxy-tetrahydrodipicolinate reductase
MF	GO:0016721	3.00661	0.0323293	0.191205	oxidoreductase activity, acting on superoxide radicals as acceptor
CC	GO:0000427	2.9395	0.000279984	0.446144	plastid-encoded plastid RNA polymerase complex
CC	GO:0009534	2.9302	2.64726e-141	15.2326	chloroplast thylakoid
CC	GO:0031976	2.92639	4.67011e-141	15.2326	plastid thylakoid
CC	GO:0010287	2.92255	2.46545e-28	3.18674	plastoglobule
BP	GO:0009772	2.90708	4.72994e-08	0.892288	photosynthetic electron transport in photosystem II
CC	GO:0009579	2.8797	1.88103e-168	18.4831	thylakoid
CC	GO:0009538	2.86575	2.4438e-07	0.828553	photosystem I reaction center
BP	GO:0042135	2.85461	0.0415304	0.191205	neurotransmitter catabolic process
BP	GO:2000278	2.85461	0.0415304	0.191205	regulation of DNA biosynthetic process
BP	GO:0009765	2.84025	2.72745e-16	1.91205	photosynthesis, light harvesting
CC	GO:0000313	2.83153	9.5114e-17	1.97578	organellar ribosome
CC	GO:0000314	2.83076	8.28857e-10	1.14723	organellar small ribosomal subunit
BP	GO:0015977	2.82604	0.00487959	0.318674	carbon fixation
BP	GO:0010206	2.78422	0.00177114	0.382409	photosystem II repair
MF	GO:0003959	2.78422	0.0168549	0.254939	NADPH dehydrogenase activity
CC	GO:0000315	2.76845	5.86448e-07	0.828553	organellar large ribosomal subunit
BP	GO:0010109	2.75507	2.06271e-07	0.892288	regulation of photosynthesis
BP	GO:0009638	2.75507	0.000632531	0.446144	phototropism
BP	GO:0098869	2.75507	0.000632531	0.446144	cellular oxidant detoxification
BP	GO:0010027	2.7336	2.64787e-08	1.01976	thylakoid membrane organization
MF	GO:0003727	2.72484	9.2369e-09	1.08349	single-stranded RNA binding
MF	GO:0016168	2.69849	1.3961e-10	1.33843	chlorophyll binding
BP	GO:1990748	2.69849	0.000817324	0.446144	cellular detoxification
MF	GO:0010297	2.68468	0.0204707	0.254939	heteropolysaccharide binding
BP	GO:0009668	2.66084	5.5074e-08	1.01976	plastid membrane organization
CC	GO:0009295	2.65869	4.10147e-16	2.10325	nucleoid
CC	GO:0042646	2.65869	4.10147e-16	2.10325	plastid nucleoid
BP	GO:0009768	2.62474	1.68315e-05	0.701083	photosynthesis, light harvesting in photosystem I
MF	GO:0051537	2.59158	0.00017346	0.573614	2 iron, 2 sulfur cluster binding
BP	GO:0019430	2.59158	0.0104285	0.318674	removal of superoxide radicals
BP	GO:0071450	2.59158	0.0104285	0.318674	cellular response to oxygen radical
BP	GO:0071451	2.59158	0.0104285	0.318674	cellular response to superoxide
BP	GO:0042372	2.59158	0.0252262	0.254939	phylloquinone biosynthetic process
BP	GO:0042374	2.59158	0.0252262	0.254939	phylloquinone metabolic process
CC	GO:0010319	2.57598	9.67079e-11	1.4659	stromule
CC	GO:0009532	2.55368	2.35598e-149	19.7578	plastid stroma
CC	GO:0009570	2.51629	5.08402e-138	18.738	chloroplast stroma
CC	GO:0042644	2.51629	1.466e-12	1.78458	chloroplast nucleoid
BP	GO:0009657	2.50411	5.26583e-39	5.60867	plastid organization
BP	GO:0009085	2.50411	0.0308306	0.254939	lysine biosynthetic process
BP	GO:0009089	2.50411	0.0308306	0.254939	lysine biosynthetic process via diaminopimelate
BP	GO:0016129	2.50411	0.0308306	0.254939	phytosteroid biosynthetic process
BP	GO:0046451	2.50411	0.0308306	0.254939	diaminopimelate metabolic process
BP	GO:0030091	2.4761	0.00551268	0.382409	protein repair
BP	GO:0009637	2.46896	1.8421e-13	1.97578	response to blue light
CC	GO:0019898	2.46604	4.93034e-05	0.701083	extrinsic component of membrane
BP	GO:0022900	2.43111	1.72987e-21	3.25048	electron transport chain
MF	GO:0008173	2.42165	2.68878e-05	0.764818	RNA methyltransferase activity
BP	GO:0034250	2.42165	0.00105445	0.509879	positive regulation of cellular amide metabolic process
BP	GO:0045727	2.42165	0.00105445	0.509879	positive regulation of translation
BP	GO:0006553	2.42165	0.0348451	0.254939	lysine metabolic process
BP	GO:0009643	2.42165	0.0348451	0.254939	photosynthetic acclimation
CC	GO:0048500	2.42165	0.0348451	0.254939	signal recognition particle
CC	GO:0044435	2.41345	5.69438e-215	29.8279	plastid part
CC	GO:0009526	2.39454	6.03916e-87	13.0656	plastid envelope
CC	GO:0044434	2.39314	1.45587e-203	28.7444	chloroplast part
BP	GO:0000303	2.38994	0.0172037	0.318674	response to superoxide
BP	GO:0000305	2.38994	0.0172037	0.318674	response to oxygen radical
BP	GO:0046688	2.38994	0.0172037	0.318674	response to copper ion
CC	GO:0009941	2.38962	1.37259e-83	12.6195	chloroplast envelope
BP	GO:0009658	2.36128	4.27889e-26	4.14277	chloroplast organization
BP	GO:0015995	2.34365	4.0796e-08	1.2747	chlorophyll biosynthetic process
BP	GO:0009895	2.34365	0.0417154	0.254939	negative regulation of catabolic process
BP	GO:0031330	2.34365	0.0417154	0.254939	negative regulation of cellular catabolic process
MF	GO:0048038	2.34365	0.0417154	0.254939	quinone binding
CC	GO:0031984	2.33523	6.46211e-100	15.4876	organelle subcompartment
CC	GO:0045261	2.32854	0.0197439	0.318674	proton-transporting ATP synthase complex, catalytic core F(1)
BP	GO:0010114	2.32072	4.07445e-09	1.4659	response to red light
BP	GO:0006801	2.31856	0.00985731	0.382409	superoxide metabolic process
MF	GO:0046933	2.29879	0.000358948	0.637349	proton-transporting ATP synthase activity, rotational mechanism
BP	GO:0006754	2.29202	2.91251e-05	0.828553	ATP biosynthetic process
BP	GO:0015985	2.29202	2.91251e-05	0.828553	energy coupled proton transport, down electrochemical gradient
BP	GO:0015986	2.29202	2.91251e-05	0.828553	ATP synthesis coupled proton transport
BP	GO:0000373	2.26965	0.02322	0.318674	Group II intron splicing
BP	GO:0016128	2.26965	0.02322	0.318674	phytosteroid metabolic process
BP	GO:0016131	2.26965	0.049878	0.254939	brassinosteroid metabolic process
BP	GO:0045995	2.26965	0.049878	0.254939	regulation of embryonic development
MF	GO:0016894	2.26965	0.049878	0.254939	endonuclease activity, active with either ribo- or deoxyribonucleic acids and producing 3'-phosphomonoesters
MF	GO:0019843	2.24108	0.000502386	0.637349	rRNA binding
BP	GO:0009144	2.20911	2.53175e-05	0.892288	purine nucleoside triphosphate metabolic process
BP	GO:0009145	2.20911	2.53175e-05	0.892288	purine nucleoside triphosphate biosynthetic process
BP	GO:0015994	2.18064	5.79868e-08	1.40217	chlorophyll metabolic process
BP	GO:0006091	2.16476	6.06455e-43	7.77565	generation of precursor metabolites and energy
BP	GO:0034644	2.151	0.00806906	0.446144	cellular response to UV
BP	GO:0009205	2.14227	9.30551e-05	0.828553	purine ribonucleoside triphosphate metabolic process
BP	GO:0009206	2.14227	9.30551e-05	0.828553	purine ribonucleoside triphosphate biosynthetic process
MF	GO:0051536	2.12591	2.52171e-07	1.33843	iron-sulfur cluster binding
MF	GO:0051540	2.12591	2.52171e-07	1.33843	metal cluster binding
MF	GO:0016702	2.11765	0.00200655	0.573614	oxidoreductase activity, acting on single donors with incorporation of molecular oxygen, incorporation of two atoms of oxygen
BP	GO:0045036	2.09681	0.000551542	0.701083	protein targeting to chloroplast
BP	GO:0072596	2.09681	0.000551542	0.701083	establishment of protein localization to chloroplast
CC	GO:0009507	2.07333	2.92658e-239	39.9618	chloroplast
BP	GO:0006364	2.06551	3.04505e-08	1.59337	rRNA processing
BP	GO:0072598	2.05101	0.000711624	0.701083	protein localization to chloroplast
CC	GO:0009536	2.05027	2.89493e-242	40.9815	plastid
BP	GO:0009199	2.04409	0.000193008	0.828553	ribonucleoside triphosphate metabolic process
BP	GO:0009201	2.04409	0.000193008	0.828553	ribonucleoside triphosphate biosynthetic process
BP	GO:0006740	2.00661	0.043769	0.318674	NADPH regeneration
MF	GO:0008028	2.00661	0.043769	0.318674	monocarboxylic acid transmembrane transporter activity
BP	GO:0016072	1.99703	7.70946e-08	1.59337	rRNA metabolic process
BP	GO:0010218	1.99464	2.35938e-06	1.2747	response to far red light
MF	GO:0044769	1.98492	0.00105381	0.701083	ATPase activity, coupled to transmembrane movement of ions, rotational mechanism
MF	GO:0016701	1.98277	0.00200275	0.637349	oxidoreductase activity, acting on single donors with incorporation of molecular oxygen
BP	GO:0009142	1.97267	0.00016763	0.892288	nucleoside triphosphate biosynthetic process
BP	GO:1901661	1.97267	0.0148899	0.446144	quinone metabolic process
BP	GO:1901663	1.97267	0.0148899	0.446144	quinone biosynthetic process
MF	GO:0016655	1.96708	1.2283e-05	1.14723	oxidoreductase activity, acting on NAD(P)H, quinone or similar compound as acceptor
BP	GO:0071484	1.95931	0.0499187	0.318674	cellular response to light intensity
MF	GO:0051539	1.9395	0.0166337	0.446144	4 iron, 4 sulfur cluster binding
BP	GO:0016109	1.90708	0.0178464	0.446144	tetraterpenoid biosynthetic process
BP	GO:0016117	1.90708	0.0178464	0.446144	carotenoid biosynthetic process
BP	GO:0042181	1.90708	0.0178464	0.446144	ketone biosynthetic process
MF	GO:0003755	1.89114	0.0318458	0.382409	peptidyl-prolyl cis-trans isomerase activity
CC	GO:0031967	1.88957	1.51958e-61	13.5755	organelle envelope
CC	GO:0031975	1.88957	1.51958e-61	13.5755	envelope
BP	GO:0006779	1.88632	1.24106e-06	1.4659	porphyrin-containing compound biosynthetic process
BP	GO:0009141	1.87537	0.000342566	0.892288	nucleoside triphosphate metabolic process
MF	GO:0008137	1.87537	0.000342566	0.892288	NADH dehydrogenase (ubiquinone) activity
MF	GO:0050136	1.87537	0.000342566	0.892288	NADH dehydrogenase (quinone) activity
BP	GO:0033014	1.85461	1.00432e-06	1.52964	tetrapyrrole biosynthetic process
BP	GO:0006119	1.84155	0.00237705	0.701083	oxidative phosphorylation
CC	GO:0045259	1.83076	0.00832643	0.573614	proton-transporting ATP synthase complex
BP	GO:0006778	1.80016	6.50494e-07	1.65711	porphyrin-containing compound metabolic process
BP	GO:0046034	1.77099	5.8471e-08	1.97578	ATP metabolic process
BP	GO:0033013	1.76845	9.95033e-07	1.65711	tetrapyrrole metabolic process
BP	GO:0065002	1.76376	0.00650244	0.637349	intracellular protein transmembrane transport
BP	GO:0042773	1.7615	0.0114594	0.573614	ATP synthesis coupled electron transport
BP	GO:0097237	1.73359	0.0193111	0.509879	cellular response to toxic substance
BP	GO:0042254	1.70136	5.20144e-07	1.84831	ribosome biogenesis
MF	GO:0016628	1.69541	0.0143778	0.573614	oxidoreductase activity, acting on the CH-CH group of donors, NAD or NADP as acceptor
MF	GO:0051213	1.69541	0.0143778	0.573614	dioxygenase activity
BP	GO:0071806	1.68468	0.00979996	0.637349	protein transmembrane transport
BP	GO:0042631	1.67404	0.0156715	0.573614	cellular response to water deprivation
BP	GO:0071462	1.67404	0.0156715	0.573614	cellular response to water stimulus
BP	GO:0015718	1.67101	0.0370463	0.446144	monocarboxylic acid transport
CC	GO:1990204	1.66084	1.14141e-05	1.52964	oxidoreductase complex
CC	GO:0009528	1.65298	0.0170242	0.573614	plastid inner membrane
CC	GO:0098796	1.64992	2.57936e-18	5.22626	membrane protein complex
BP	GO:0016108	1.63738	0.0276401	0.509879	tetraterpenoid metabolic process
BP	GO:0016116	1.63738	0.0276401	0.509879	carotenoid metabolic process
CC	GO:0009706	1.63738	0.0276401	0.509879	chloroplast inner membrane
BP	GO:0046148	1.62938	1.45061e-06	1.84831	pigment biosynthetic process
BP	GO:0006412	1.61946	4.53817e-24	7.07457	translation
MF	GO:0003954	1.61757	0.00197107	0.892288	NADH dehydrogenase activity
MF	GO:0016651	1.6143	1.96558e-05	1.52964	oxidoreductase activity, acting on NAD(P)H
BP	GO:0043043	1.61285	6.49624e-24	7.07457	peptide biosynthetic process
CC	GO:0015935	1.60668	2.14878e-05	1.52964	small ribosomal subunit
BP	GO:0034614	1.60551	0.00342189	0.828553	cellular response to reactive oxygen species
BP	GO:0034622	1.60077	1.44771e-12	3.76036	cellular protein-containing complex assembly
BP	GO:0006417	1.59157	0.00153038	0.956023	regulation of translation
BP	GO:0034248	1.59157	0.00153038	0.956023	regulation of cellular amide metabolic process
BP	GO:0006518	1.58836	1.54222e-23	7.1383	peptide metabolic process
BP	GO:0098754	1.56921	0.0330262	0.509879	detoxification
BP	GO:0006164	1.54488	0.000384486	1.21096	purine nucleotide biosynthetic process
BP	GO:0009451	1.54321	0.000107944	1.40217	RNA modification
MF	GO:0140101	1.51757	0.000493478	1.21096	catalytic activity, acting on a tRNA
BP	GO:0071482	1.51185	0.000152356	1.40217	cellular response to light stimulus
BP	GO:0072522	1.49965	0.000572081	1.21096	purine-containing compound biosynthetic process
BP	GO:0042440	1.49049	4.41248e-06	1.97578	pigment metabolic process
BP	GO:0022904	1.48115	0.0156373	0.701083	respiratory electron transport chain
BP	GO:0043604	1.47997	1.68828e-21	7.32951	amide biosynthetic process
MF	GO:0009055	1.47868	3.93145e-08	2.7406	electron transfer activity
BP	GO:0009135	1.4761	0.0330307	0.573614	purine nucleoside diphosphate metabolic process
BP	GO:0009179	1.4761	0.0330307	0.573614	purine ribonucleoside diphosphate metabolic process
BP	GO:0009185	1.4761	0.0330307	0.573614	ribonucleoside diphosphate metabolic process
BP	GO:0046031	1.4761	0.0330307	0.573614	ADP metabolic process
BP	GO:0071478	1.47358	0.000219949	1.40217	cellular response to radiation
BP	GO:0045454	1.46819	0.000344582	1.33843	cell redox homeostasis
BP	GO:0022613	1.46656	1.43062e-05	1.84831	ribonucleoprotein complex biogenesis
BP	GO:0034660	1.46317	1.05544e-08	2.99554	ncRNA metabolic process
CC	GO:0048046	1.46284	1.00547e-13	4.78011	apoplast
BP	GO:0034470	1.46104	3.00832e-06	2.10325	ncRNA processing
BP	GO:0009644	1.42165	0.00490092	0.956023	response to high light intensity
BP	GO:0043603	1.41073	3.39657e-20	7.45698	cellular amide metabolic process
BP	GO:0009152	1.39191	0.00414371	1.01976	purine ribonucleotide biosynthetic process
BP	GO:0034599	1.3877	0.00904716	0.892288	cellular response to oxidative stress
BP	GO:0009165	1.38722	0.000359009	1.4659	nucleotide biosynthetic process
CC	GO:0005840	1.35752	8.94448e-18	7.01083	ribosome
BP	GO:0009260	1.34812	0.00399445	1.08349	ribonucleotide biosynthetic process
BP	GO:0046390	1.34812	0.00399445	1.08349	ribose phosphate biosynthetic process
BP	GO:1901293	1.33378	0.000600732	1.4659	nucleoside phosphate biosynthetic process
BP	GO:0009639	1.33074	1.3869e-06	2.61313	response to red or far red light
MF	GO:0016627	1.31855	0.0232164	0.764818	oxidoreductase activity, acting on the CH-CH group of donors
BP	GO:0071214	1.30207	1.22628e-05	2.29446	cellular response to abiotic stimulus
BP	GO:0104004	1.30207	1.22628e-05	2.29446	cellular response to environmental stimulus
CC	GO:0042170	1.29879	0.0111626	0.956023	plastid membrane
BP	GO:0006090	1.29612	0.0327702	0.701083	pyruvate metabolic process
BP	GO:0017038	1.29612	0.0327702	0.701083	protein import
CC	GO:1990904	1.28901	8.75152e-18	7.64818	ribonucleoprotein complex
BP	GO:0006163	1.27543	0.000571708	1.59337	purine nucleotide metabolic process
CC	GO:0031969	1.25859	0.0231079	0.828553	chloroplast membrane
BP	GO:0006399	1.25011	0.00182065	1.40217	tRNA metabolic process
BP	GO:0009409	1.24795	2.8373e-09	4.2065	response to cold
BP	GO:0009735	1.24705	4.43907e-08	3.63289	response to cytokinin
BP	GO:0009606	1.24285	0.0117067	1.01976	tropism
MF	GO:0019829	1.23906	0.0190543	0.892288	ATPase-coupled cation transmembrane transporter activity
BP	GO:0009150	1.21427	0.0018856	1.4659	purine ribonucleotide metabolic process
MF	GO:0042625	1.2091	0.0225395	0.892288	ATPase-coupled ion transmembrane transporter activity
BP	GO:0072521	1.2018	0.000686193	1.72084	purine-containing compound metabolic process
CC	GO:0005576	1.20163	1.92829e-11	5.54493	extracellular region
BP	GO:0009117	1.19926	0.000318582	1.91205	nucleotide metabolic process
MF	GO:0005507	1.19689	0.000423219	1.84831	copper ion binding
BP	GO:1902600	1.19564	0.00676514	1.21096	proton transmembrane transport
BP	GO:0061024	1.19522	0.0119188	1.08349	membrane organization
CC	GO:0044391	1.19399	2.66378e-05	2.48566	ribosomal subunit
BP	GO:0009259	1.18218	0.00192143	1.52964	ribonucleotide metabolic process
BP	GO:0019693	1.18218	0.00192143	1.52964	ribose phosphate metabolic process
BP	GO:1901566	1.18105	2.67356e-23	11.4723	organonitrogen compound biosynthetic process
BP	GO:0009416	1.15069	8.59651e-15	7.71192	response to light stimulus
BP	GO:0006753	1.14974	0.000558861	1.91205	nucleoside phosphate metabolic process
BP	GO:0007623	1.14935	0.00333254	1.4659	circadian rhythm
BP	GO:0048511	1.14935	0.00333254	1.4659	rhythmic process
BP	GO:0065003	1.12798	1.51728e-07	4.0153	protein-containing complex assembly
BP	GO:0009314	1.1053	8.0772e-14	7.71192	response to radiation
BP	GO:0043933	1.08522	2.10316e-07	4.2065	protein-containing complex subunit organization
MF	GO:0003735	1.08479	9.07202e-09	5.03505	structural constituent of ribosome
BP	GO:0009642	1.08256	0.0030005	1.65711	response to light intensity
BP	GO:0000302	1.077	0.00195832	1.78458	response to reactive oxygen species
BP	GO:0055114	1.04627	3.52005e-22	13.3206	oxidation-reduction process
BP	GO:0009411	1.03903	0.0411772	0.956023	response to UV
MF	GO:0016209	1.03086	0.00616211	1.59337	antioxidant activity
MF	GO:0005198	1.01679	2.90904e-08	5.28999	structural molecule activity
MF	GO:0016853	1.00661	0.0163276	1.33843	isomerase activity
MF	GO:0008168	1.00318	0.00101718	2.23072	methyltransferase activity
MF	GO:0016741	0.996627	0.000899101	2.29446	transferase activity, transferring one-carbon groups
CC	GO:0022626	0.972126	0.00321645	1.97578	cytosolic ribosome
MF	GO:0003690	0.960141	0.00651633	1.78458	double-stranded DNA binding
BP	GO:0044085	0.947225	2.91197e-10	7.45698	cellular component biogenesis
BP	GO:0055086	0.940949	0.00256734	2.16699	nucleobase-containing small molecule metabolic process
BP	GO:0009266	0.935294	1.76963e-06	4.71638	response to temperature stimulus
MF	GO:0001883	0.917806	0.0287878	1.33843	purine nucleoside binding
MF	GO:0005525	0.917806	0.0287878	1.33843	GTP binding
MF	GO:0019001	0.917806	0.0287878	1.33843	guanyl nucleotide binding
MF	GO:0032550	0.917806	0.0287878	1.33843	purine ribonucleoside binding
MF	GO:0032561	0.917806	0.0287878	1.33843	guanyl ribonucleotide binding
MF	GO:0003723	0.917264	5.84248e-10	7.64818	RNA binding
BP	GO:0006396	0.917103	7.12195e-06	4.39771	RNA processing
CC	GO:0044445	0.905528	0.00652864	1.97578	cytosolic part
CC	GO:0032991	0.902892	1.97814e-21	16.3161	protein-containing complex
BP	GO:0080167	0.901742	0.0319993	1.33843	response to karrikin
CC	GO:0044444	0.898642	7.87129e-87	50.0956	cytoplasmic part
MF	GO:0032549	0.896187	0.0284391	1.40217	ribonucleoside binding
BP	GO:0010608	0.891139	0.0214487	1.52964	posttranscriptional regulation of gene expression
MF	GO:0016491	0.889489	3.69978e-16	12.8744	oxidoreductase activity
BP	GO:0051188	0.882166	0.00309511	2.35819	cofactor biosynthetic process
MF	GO:0001882	0.881085	0.0313197	1.40217	nucleoside binding
BP	GO:0009738	0.880607	0.0347582	1.33843	abscisic acid-activated signaling pathway
BP	GO:0090407	0.858626	0.0174907	1.72084	organophosphate biosynthetic process
BP	GO:0019725	0.847412	0.0253637	1.59337	cellular homeostasis
CC	GO:0005737	0.821212	5.12273e-78	51.434	cytoplasm
MF	GO:0048037	0.81975	1.86645e-09	8.79541	cofactor binding
BP	GO:0042742	0.816919	0.000904291	3.25048	defense response to bacterium
BP	GO:0022607	0.811594	2.79727e-05	4.84385	cellular component assembly
CC	GO:0043228	0.79303	1.83055e-11	11.2173	non-membrane-bounded organelle
CC	GO:0043232	0.79303	1.83055e-11	11.2173	intracellular non-membrane-bounded organelle
BP	GO:0044271	0.754648	3.42538e-19	19.5666	cellular nitrogen compound biosynthetic process
MF	GO:0046906	0.751215	0.000216717	4.52518	tetrapyrrole binding
BP	GO:0009617	0.750272	0.00118874	3.63289	response to bacterium
BP	GO:0019637	0.716289	0.0144896	2.54939	organophosphate metabolic process
BP	GO:0009628	0.683445	7.52193e-12	14.7865	response to abiotic stimulus
BP	GO:0051186	0.682906	0.00483159	3.44168	cofactor metabolic process
CC	GO:0044446	0.623614	4.58648e-28	35.1816	intracellular organelle part
BP	GO:0010467	0.623127	5.73824e-14	19.8853	gene expression
CC	GO:0044422	0.622612	5.35262e-28	35.1816	organelle part
BP	GO:1901135	0.618887	0.0158643	3.18674	carbohydrate derivative metabolic process
MF	GO:0050662	0.610483	0.0197948	3.05927	coenzyme binding
BP	GO:0044249	0.572773	2.03836e-15	24.6017	cellular biosynthetic process
BP	GO:1901576	0.558885	6.07292e-15	24.8566	organic substance biosynthetic process
BP	GO:0017144	0.549975	0.0386876	2.99554	drug metabolic process
CC	GO:0016020	0.548042	1.92244e-17	28.9994	membrane
BP	GO:0009058	0.540642	1.54273e-14	25.4939	biosynthetic process
MF	GO:0003700	0.535725	0.0249449	3.63289	DNA-binding transcription factor activity
BP	GO:0006979	0.531708	0.0232784	3.76036	response to oxidative stress
BP	GO:0006996	0.528161	0.000451732	7.71192	organelle organization
BP	GO:0034645	0.527831	8.50856e-09	17.0172	cellular macromolecule biosynthetic process
BP	GO:0044281	0.51932	0.000345673	8.2218	small molecule metabolic process
BP	GO:0009059	0.517689	1.26828e-08	17.2084	macromolecule biosynthetic process
BP	GO:0071840	0.509909	8.66001e-07	14.0217	cellular component organization or biogenesis
BP	GO:0019438	0.506104	1.70857e-06	13.5755	aromatic compound biosynthetic process
CC	GO:0043231	0.504732	1.02737e-35	52.7725	intracellular membrane-bounded organelle
CC	GO:0043227	0.496483	4.99623e-35	53.0274	membrane-bounded organelle
CC	GO:0044425	0.492581	0.000592518	8.413	membrane part
BP	GO:1901362	0.487929	2.74327e-06	13.9579	organic cyclic compound biosynthetic process
BP	GO:0018130	0.484468	7.79669e-06	13.1294	heterocycle biosynthetic process
BP	GO:0016070	0.471833	2.36379e-06	14.914	RNA metabolic process
CC	GO:0005739	0.470188	0.0116732	5.6724	mitochondrion
CC	GO:0043229	0.464888	3.8639e-33	54.812	intracellular organelle
CC	GO:0043226	0.462681	7.02742e-33	54.812	organelle
BP	GO:0016043	0.459127	4.49359e-05	12.4283	cellular component organization
BP	GO:0034654	0.407897	0.000868204	11.0899	nucleobase-containing compound biosynthetic process
BP	GO:0031323	0.400374	0.000630055	11.9184	regulation of cellular metabolic process
BP	GO:0065008	0.394306	0.0326958	5.73614	regulation of biological quality
CC	GO:0005622	0.388079	2.68228e-26	57.2976	intracellular
CC	GO:0044424	0.388079	2.68228e-26	57.2976	intracellular part
BP	GO:0051252	0.362891	0.0108684	9.11409	regulation of RNA metabolic process
BP	GO:0009725	0.341155	0.0136449	9.6877	response to hormone
BP	GO:0009719	0.33916	0.0143078	9.6877	response to endogenous stimulus
BP	GO:0019219	0.33738	0.0170064	9.24156	regulation of nucleobase-containing compound metabolic process
CC	GO:0044464	0.336523	1.00645e-22	60.2932	cell part
CC	GO:0005623	0.336203	1.07367e-22	60.2932	cell
BP	GO:2000112	0.33387	0.0172936	9.36902	regulation of cellular macromolecule biosynthetic process
BP	GO:0010556	0.333424	0.0169657	9.43276	regulation of macromolecule biosynthetic process
BP	GO:0006355	0.33151	0.0231784	8.73168	regulation of transcription, DNA-templated
BP	GO:1903506	0.33151	0.0231784	8.73168	regulation of nucleic acid-templated transcription
BP	GO:2001141	0.33151	0.0231784	8.73168	regulation of RNA biosynthetic process
BP	GO:0006351	0.326813	0.0190101	9.43276	transcription, DNA-templated
BP	GO:0097659	0.326813	0.0190101	9.43276	nucleic acid-templated transcription
BP	GO:0032774	0.32277	0.0207048	9.43276	RNA biosynthetic process
BP	GO:0009889	0.320138	0.0172564	10.0064	regulation of biosynthetic process
BP	GO:0031326	0.314847	0.0210009	9.81517	regulation of cellular biosynthetic process
BP	GO:0010033	0.314569	0.015366	10.7075	response to organic substance
BP	GO:0050896	0.308046	4.29638e-06	27.7884	response to stimulus
BP	GO:0051171	0.304768	0.0235266	10.0701	regulation of nitrogen compound metabolic process
BP	GO:0042221	0.293076	0.00463338	15.2326	response to chemical
BP	GO:0080090	0.278235	0.0377453	10.1976	regulation of primary metabolic process
BP	GO:1901564	0.257083	0.00105555	22.9446	organonitrogen compound metabolic process
BP	GO:0019222	0.247599	0.0361174	12.6195	regulation of metabolic process
BP	GO:0006950	0.247575	0.0150166	16.1249	response to stress
BP	GO:0008152	0.187831	9.18172e-08	58.3811	metabolic process
BP	GO:0044237	0.16588	0.000153878	48.3748	cellular metabolic process
MF	GO:0003824	0.127356	0.0140847	42.7024	catalytic activity
BP	GO:0009987	0.111071	0.00329582	57.1064	cellular process
